# Supplementary material
Source: Research Square preprint supplement (doi:10.21203/rs.3.rs-9229349/v1)
Supplement: Supplementary file 1 [file 094e69aa8dc349198c9747bf.docx]

clear all

set more off

set type double

set seed 20260227

* ==================== Path Settings ====================

* IMPORTANT: Ensure there are no Chinese characters in your file path

global project "C:/Users/Lenovo/Desktop/Aging_Employment/MyResearch"

cd "$project"

cap mkdir "$project/data/cleaned"

cap mkdir "$project/temp"

cap mkdir "$project/output"

* Install required packages

local req_cmds "reghdfe estout ftools center winsor2 ivreghdfe xtoverid"

foreach cmd of local req_cmds {

cap which `cmd'

if _rc ssc install `cmd', replace

}

* ==================== 1. Data Import ====================

import excel "WDI_panel_data.xlsx", sheet("Sheet1") firstrow clear

* Standardize country and year variable names

cap rename CountryName country

cap rename countryname country

cap rename Country country

cap rename COUNTRY country

cap rename Year year

cap rename YEAR year

* ==================== 2. Variable Renaming (English) =====================

* Dependent Variables: Youth Unemployment Rates

rename SLUEM1524ZS YUR_total

rename SLUEM1524MAZS YUR_male

rename SLUEM1524FEZS YUR_female

* Robustness Dependent Variables: Youth NEET Rates

rename SLUEMNEETMEZS NEET_total

rename SLUEMNEETMAMEZS NEET_male

rename SLUEMNEETFEMEZS NEET_female

* Core Independent Variables

rename SPPOPDPNDOL Aging /* Old-age dependency ratio */

rename SPPOP65UPTOZS Aging_65up /* Population ages 65 and above (% of total) */

* Moderating Variable

rename NECONTOTLZS Consume /* Final consumption expenditure (% of GDP) */

* Control Variables

rename NYGDPMKTPKDZG GDP_growth

rename FPCPITOTLZG Inflation /* CPI */

rename SPPOPGROW Pop_growth

rename SPURBTOTLINZS Urbanization

rename NETRDGNFSZS Trade_openness /* FDI / Trade openness */

* ==================== 3. String to Numeric Conversion ====================

local str_vars YUR_total YUR_male YUR_female ///

NEET_total NEET_male NEET_female ///

Aging Aging_65up ///

Consume ///

GDP_growth Inflation Pop_growth Urbanization Trade_openness

foreach v of local str_vars {

cap confirm string variable `v'

if !_rc {

replace `v' = "" if `v' == ".."

destring `v', replace force

}

}

* ==================== 4. Country Encoding ====================

gen country_clean = trim(lower(country))

encode country_clean, gen(country_code)

drop country_clean

xtset country_code year, yearly

* ==================== 5. Process Main Sample ====================

keep if year >= 2005 & year <= 2025

* ==================== 6. Exclude Countries/Regions with Pop < 1 Million ====================

gen exclude_flag = 0

* [Exclusion list for small economies]

replace exclude_flag = 1 if regexm(lower(country), "american samoa")

replace exclude_flag = 1 if regexm(lower(country), "andorra")

replace exclude_flag = 1 if regexm(lower(country), "antigua")

replace exclude_flag = 1 if regexm(lower(country), "aruba")

replace exclude_flag = 1 if regexm(lower(country), "bahamas")

replace exclude_flag = 1 if regexm(lower(country), "barbados")

replace exclude_flag = 1 if regexm(lower(country), "belize")

replace exclude_flag = 1 if regexm(lower(country), "bermuda")

replace exclude_flag = 1 if regexm(lower(country), "bhutan")

replace exclude_flag = 1 if regexm(lower(country), "brunei")

replace exclude_flag = 1 if regexm(lower(country), "cabo verde") | regexm(lower(country), "cape verde")

replace exclude_flag = 1 if regexm(lower(country), "cayman")

replace exclude_flag = 1 if regexm(lower(country), "channel islands")

replace exclude_flag = 1 if regexm(lower(country), "macao") | regexm(lower(country), "macau")

replace exclude_flag = 1 if regexm(lower(country), "comoros")

replace exclude_flag = 1 if regexm(lower(country), "curacao") | regexm(lower(country), "curaçao")

replace exclude_flag = 1 if regexm(lower(country), "dominica") & !regexm(lower(country), "dominican")

replace exclude_flag = 1 if regexm(lower(country), "faroe")

replace exclude_flag = 1 if regexm(lower(country), "fiji")

replace exclude_flag = 1 if regexm(lower(country), "french polynesia")

replace exclude_flag = 1 if regexm(lower(country), "greenland")

replace exclude_flag = 1 if regexm(lower(country), "grenada")

replace exclude_flag = 1 if regexm(lower(country), "guam")

replace exclude_flag = 1 if regexm(lower(country), "guyana")

replace exclude_flag = 1 if regexm(lower(country), "iceland")

replace exclude_flag = 1 if regexm(lower(country), "isle of man")

replace exclude_flag = 1 if regexm(lower(country), "kiribati")

replace exclude_flag = 1 if regexm(lower(country), "liechtenstein")

replace exclude_flag = 1 if regexm(lower(country), "luxembourg")

replace exclude_flag = 1 if regexm(lower(country), "maldives")

replace exclude_flag = 1 if regexm(lower(country), "malta")

replace exclude_flag = 1 if regexm(lower(country), "marshall islands")

replace exclude_flag = 1 if regexm(lower(country), "micronesia")

replace exclude_flag = 1 if regexm(lower(country), "monaco")

replace exclude_flag = 1 if regexm(lower(country), "montenegro")

replace exclude_flag = 1 if regexm(lower(country), "new caledonia")

replace exclude_flag = 1 if regexm(lower(country), "northern mariana")

replace exclude_flag = 1 if regexm(lower(country), "palau")

replace exclude_flag = 1 if regexm(lower(country), "samoa") & !regexm(lower(country), "american")

replace exclude_flag = 1 if regexm(lower(country), "san marino")

replace exclude_flag = 1 if regexm(lower(country), "sao tome") | regexm(lower(country), "são tomé")

replace exclude_flag = 1 if regexm(lower(country), "seychelles")

replace exclude_flag = 1 if regexm(lower(country), "sint maarten")

replace exclude_flag = 1 if regexm(lower(country), "solomon islands")

replace exclude_flag = 1 if regexm(lower(country), "st. kitts") | regexm(lower(country), "saint kitts")

replace exclude_flag = 1 if regexm(lower(country), "st. martin") | regexm(lower(country), "saint martin")

replace exclude_flag = 1 if regexm(lower(country), "st. vincent") | regexm(lower(country), "saint vincent")

replace exclude_flag = 1 if regexm(lower(country), "suriname")

replace exclude_flag = 1 if regexm(lower(country), "tonga")

replace exclude_flag = 1 if regexm(lower(country), "turks and caicos")

replace exclude_flag = 1 if regexm(lower(country), "tuvalu")

replace exclude_flag = 1 if regexm(lower(country), "vanuatu")

replace exclude_flag = 1 if regexm(lower(country), "virgin islands") & regexm(lower(country), "u.s.")

di "========== Excluded Countries (Population < 1 million) =========="

tab country if exclude_flag == 1

* Exclude these countries

drop if exclude_flag == 1

drop exclude_flag

di "========== Sample Size After Exclusion =========="

count

* ==================== 7. Winsorization (1% and 99%) ====================

local winsor_vars YUR_total YUR_male YUR_female ///

NEET_total NEET_male NEET_female ///

Aging Aging_65up ///

Consume ///

GDP_growth Inflation Pop_growth Urbanization Trade_openness

foreach v of local winsor_vars {

winsor2 `v', cuts(1 99) replace

}

* ==================== 8. Construct Base Sample ====================

global controls "GDP_growth Inflation Pop_growth Urbanization Trade_openness"

* Generate sample marker based on non-missing core variables

egen missing_count = rowmiss(YUR_total YUR_male YUR_female ///

Aging Aging_65up Consume ///

$controls)

gen base_sample = (missing_count == 0)

tab base_sample, m

* Keep only base sample

keep if base_sample == 1

drop missing_count base_sample

* Drop countries with less than 5 years of observations (ensure panel balance)

bysort country_code: gen N_country = _N

drop if N_country < 5

tab N_country

count

di "========== Sample Size After Removing Short Panels =========="

count

* ==================== 9. Mean Centering (For Interaction Terms) =====================

center Aging Consume, prefix(c_)

* Generate interaction term

gen c_Aging_Consume = c_Aging * c_Consume

label var c_Aging_Consume "Aging * Consumption (Centered)"

* ==================== 10. Save Cleaned Sample ====================

log using "$project/output/sample_selection.log", replace text

di "Original Observations: 4,522"

di "Excluded pop < 1M: 1,087 obs (54 countries)"

di "Missing core variables: 767 obs"

di "Short panels removed: 7 obs"

di "Final Sample Size: 2,661 obs"

log close

save "$project/data/cleaned/full_sample.dta", replace

di "========== Base sample saved. Total obs = " _N "=========="

* ==================== Hausman Test ====================

di "========== Hausman Test: FE vs RE =========="

use "$project/data/cleaned/full_sample.dta", clear

global controls "GDP_growth Inflation Pop_growth Urbanization Trade_openness"

* Step 1: Fixed Effects Model (FE)

xtreg YUR_total Aging $controls, fe

estimates store FE

* Step 2: Random Effects Model (RE)

xtreg YUR_total Aging $controls, re

estimates store RE

* Step 3: Traditional Hausman Test

log using "$project/output/hausman_test.log", replace text

di "========== Hausman Test Results =========="

hausman FE RE, sigmamore

log close

* Step 4: Robust Hausman Test (xtoverid)

qui xtreg YUR_total Aging $controls, re

xtoverid

* ==================== Table 1: Descriptive Statistics ====================

di "========== Table 1 Descriptive Statistics =========="

* Get regression sample

reghdfe YUR_total Aging $controls, absorb(country_code year) vce(cluster country_code)

gen reg_sample = e(sample)

keep if reg_sample == 1

local desc_vars "YUR_total YUR_male YUR_female Aging Aging_65up Consume GDP_growth Inflation Pop_growth Urbanization Trade_openness"

estpost sum `desc_vars', detail

esttab using "$project/output/Table1_Descriptive_Statistics.rtf", ///

replace cells("count mean sd min max p50") ///

title("Table 1: Descriptive Statistics of Core Variables") nonumber nomtitle

* ==================== Table 2: Correlation Matrix ====================

di "========== Table 2 Correlation Matrix =========="

local core_vars "YUR_total Aging Consume GDP_growth Inflation Pop_growth Urbanization Trade_openness"

estpost correlate `core_vars', matrix listwise

esttab using "$project/output/Table2_Correlation_Matrix.rtf", ///

replace unstack not noobs compress ///

title("Table 2: Correlation Matrix")

* ==================== Table 3: VIF Test ====================

di "========== Table 3 VIF Test =========="

reg YUR_total Aging Consume $controls

estat vif

matrix vif_matrix = r(vif)

esttab matrix(vif_matrix) using "$project/output/Table3_VIF_Test.rtf", ///

replace title("Table 3: Variance Inflation Factor (VIF) Test") ///

addnotes("Note: Mean VIF < 10 indicates no severe multicollinearity.")

* ============================================================================

* Table 4: Baseline Regression

* ============================================================================

* Step 1: Controls only

reghdfe YUR_total $controls Consume, absorb(country_code year) vce(cluster country_code)

est store step1_total

reghdfe YUR_male $controls Consume, absorb(country_code year) vce(cluster country_code)

est store step1_male

reghdfe YUR_female $controls Consume, absorb(country_code year) vce(cluster country_code)

est store step1_female

* Step 2: Independent variable only

reghdfe YUR_total Aging, absorb(country_code year) vce(cluster country_code)

est store step2_total

reghdfe YUR_male Aging, absorb(country_code year) vce(cluster country_code)

est store step2_male

reghdfe YUR_female Aging, absorb(country_code year) vce(cluster country_code)

est store step2_female

* Step 3: Full model

reghdfe YUR_total Aging $controls Consume, absorb(country_code year) vce(cluster country_code)

est store step3_total

reghdfe YUR_male Aging $controls Consume, absorb(country_code year) vce(cluster country_code)

est store step3_male

reghdfe YUR_female Aging $controls Consume, absorb(country_code year) vce(cluster country_code)

est store step3_female

* Export Table 4

esttab step1_total step1_male step1_female ///

step2_total step2_male step2_female ///

step3_total step3_male step3_female ///

using "$project/output/Table4_Baseline_Regression.rtf", ///

replace ///

b(3) se(3) star(* 0.1 ** 0.05 *** 0.01) ///

title("Table 4: Baseline Regression - Impact of Aging on Youth Unemployment") ///

mgroups("Controls Only" "IV Only" "Full Model", ///

pattern(1 1 1 1 1 1 1 1 1) ///

prefix(\multicolumn{@span}{c}{) suffix(}) span) ///

mtitles("(1)" "(2)" "(3)" "(4)" "(5)" "(6)" "(7)" "(8)" "(9)") ///

keep(Aging Consume GDP_growth Inflation Pop_growth Urbanization Trade_openness _cons) ///

order(Aging Consume) ///

varlabels( ///

Aging "Aging" ///

Consume "Consumption" ///

GDP_growth "GDP Growth" ///

Inflation "Inflation" ///

Pop_growth "Pop Growth" ///

Urbanization "Urbanization" ///

Trade_openness "Trade Openness" ///

_cons "Constant") ///

stats(N r2 N_clust, ///

fmt(0 3 0) ///

labels("Observations" "R-squared" "Number of Countries")) ///

addnotes("Note: Dependent variable is Youth Unemployment Rate. Robust standard errors clustered at the country level are in parentheses. *** p<0.01, ** p<0.05, * p<0.1.") ///

compress noabbrev

* ==================== Table 5: Moderating Effect (Consumption) ====================

di "========== Table 5 Moderating Effect =========="

reghdfe YUR_total c_Aging c_Consume c_Aging_Consume $controls, ///

absorb(country_code year) vce(cluster country_code)

est store mod_total

reghdfe YUR_male c_Aging c_Consume c_Aging_Consume $controls, ///

absorb(country_code year) vce(cluster country_code)

est store mod_male

reghdfe YUR_female c_Aging c_Consume c_Aging_Consume $controls, ///

absorb(country_code year) vce(cluster country_code)

est store mod_female

esttab mod_total mod_male mod_female ///

using "$project/output/Table5_Moderating_Effect.rtf", ///

replace b(3) se(3) star(* 0.1 ** 0.05 *** 0.01) ///

title("Table 5: Moderating Effect of Consumption on Aging and Youth Unemployment") ///

mtitles("Total" "Male" "Female") ///

scalars("r2 R-squared" "N Observations" "N_clust Number of Countries") ///

addnotes("Note: Interaction variables are mean-centered. Country and year fixed effects are included. Robust standard errors clustered at the country level are in parentheses. *** p<0.01, ** p<0.05, * p<0.1.") ///

keep(c_Aging c_Consume c_Aging_Consume GDP_growth Inflation Pop_growth Urbanization Trade_openness) ///

varlabels( ///

c_Aging "Aging" ///

c_Consume "Consumption" ///

c_Aging_Consume "Aging x Consumption" ///

GDP_growth "GDP Growth" ///

Inflation "Inflation" ///

Pop_growth "Pop Growth" ///

Urbanization "Urbanization" ///

Trade_openness "Trade Openness" ///

) width(\hsize) nonumber

* ==================== Heterogeneity: Income Group Classification ====================

import excel "$project/income_classification.xlsx", sheet("List of economies") clear

rename A country_name

rename B iso3

rename C region

rename D income_level

rename E income_group

rename F lending_category

drop if country_name == "country"

destring income_group, replace

drop if missing(country_name)

gen str50 country_match = trim(country_name)

duplicates drop country_match, force

isid country_match

save "$project/temp/income_classification.dta", replace

use "$project/data/cleaned/full_sample.dta", clear

gen str50 country_match = trim(country)

replace country_match = "Côte d'Ivoire" if country == "Cote d'Ivoire"

replace country_match = "Vietnam" if country == "Viet Nam"

merge m:1 country_match using "$project/temp/income_classification.dta"

drop if _merge == 2

* Manual matching for missing countries

replace income_group = 2 if country == "Cote d'Ivoire" & _merge==1

replace income_level = "Lower middle income" if country == "Cote d'Ivoire" & _merge==1

replace income_group = 1 if country == "Ethiopia" & _merge==1

replace income_level = "Low income" if country == "Ethiopia" & _merge==1

replace income_group = 3 if country == "Turkiye" & _merge==1

replace income_level = "Upper middle income" if country == "Turkiye" & _merge==1

replace income_group = 3 if country == "Venezuela, RB" & _merge==1

replace income_level = "Upper middle income" if country == "Venezuela, RB" & _merge==1

drop _merge

* Generate developed/developing dummies

gen developed = (income_group == 4)

gen developing = (income_group >= 1 & income_group <= 3)

label variable developed "Developed Countries"

label variable developing "Developing Countries"

save "$project/data/cleaned/full_sample_with_income.dta", replace

* ==================== Table 6: Heterogeneity Analysis (Developed vs Developing) ====================

di "========== Table 6 Heterogeneity: Developed vs Developing =========="

preserve

keep if developed == 1

reghdfe YUR_total c_Aging $controls, absorb(country_code year) vce(cluster country_code)

est store dev_base

reghdfe YUR_total c_Aging c_Consume c_Aging_Consume $controls, absorb(country_code year) vce(cluster country_code)

est store dev_cons

restore

preserve

keep if developing == 1

reghdfe YUR_total c_Aging $controls, absorb(country_code year) vce(cluster country_code)

est store undev_base

reghdfe YUR_total c_Aging c_Consume c_Aging_Consume $controls, absorb(country_code year) vce(cluster country_code)

est store undev_cons

restore

esttab dev_base undev_base dev_cons undev_cons ///

using "$project/output/Table6_Heterogeneity_Income.rtf", ///

replace b(3) se(3) star(* 0.1 ** 0.05 *** 0.01) ///

title("Table 6: Heterogeneity Analysis - Developed vs Developing Countries") ///

mtitles("Developed" "Developing" "Developed" "Developing") ///

mgroups("Baseline" "Moderation", pattern(1 0 1 0)) ///

order(c_Aging c_Aging_Consume c_Consume) ///

varlabels( ///

c_Aging "Aging" ///

c_Aging_Consume "Aging x Consumption" ///

c_Consume "Consumption" ///

GDP_growth "GDP Growth" ///

Inflation "Inflation" ///

Pop_growth "Pop Growth" ///

Urbanization "Urbanization" ///

Trade_openness "Trade Openness") ///

drop(_cons) ///

scalars("r2 R-squared" "N Observations" "N_clust Number of Countries") ///

addnotes("Note: Dependent variable is Youth Unemployment Rate. Country and year fixed effects are included. Robust standard errors clustered at the country level are in parentheses. *** p<0.01, ** p<0.05, * p<0.1") ///

width(\hsize) nonumber

* ==================== Heterogeneity: Service Sector Employment ====================

reghdfe YUR_total Aging $controls, absorb(country_code year) vce(cluster country_code)

gen base_sample = e(sample)

cap confirm variable SLSRVEMPLZS

if _rc {

di as error "Variable SLSRVEMPLZS (Service employment %) not found."

exit 111

}

sum SLSRVEMPLZS if base_sample==1, detail

gen high_serv_emp = (SLSRVEMPLZS > r(p50)) if base_sample==1 & !missing(SLSRVEMPLZS)

reghdfe YUR_total c_Aging $controls if high_serv_emp==0 & base_sample==1, absorb(country_code year) vce(cluster country_code)

est store low_serv_base

reghdfe YUR_total c_Aging c_Consume c_Aging_Consume $controls if high_serv_emp==0 & base_sample==1, absorb(country_code year) vce(cluster country_code)

est store low_serv_mod

reghdfe YUR_total c_Aging $controls if high_serv_emp==1 & base_sample==1, absorb(country_code year) vce(cluster country_code)

est store high_serv_base

reghdfe YUR_total c_Aging c_Consume c_Aging_Consume $controls if high_serv_emp==1 & base_sample==1, absorb(country_code year) vce(cluster country_code)

est store high_serv_mod

esttab low_serv_base high_serv_base low_serv_mod high_serv_mod ///

using "$project/output/Table7_Heterogeneity_Service.rtf", ///

replace b(3) se(3) star(* 0.1 ** 0.05 *** 0.01) ///

title("Table 7: Heterogeneity Analysis by Service Sector Employment Share") ///

mtitles("Low Service" "High Service" "Low Service" "High Service") ///

order(c_Aging c_Aging_Consume c_Consume) ///

varlabels( ///

c_Aging "Aging" ///

c_Aging_Consume "Aging x Consumption" ///

c_Consume "Consumption" ///

GDP_growth "GDP Growth" ///

Inflation "Inflation" ///

Pop_growth "Pop Growth" ///

Urbanization "Urbanization" ///

Trade_openness "Trade Openness") ///

drop(_cons) ///

stats(N r2, fmt(0 3) labels("Observations" "R-squared")) ///

addnotes("Note: Grouped by median service employment share. Country and year fixed effects are included. *** p<0.01, ** p<0.05, * p<0.1.") ///

width(\hsize) nonumber

* ============================================================================

* Robustness Checks: Substituting Variables & Trim

* ============================================================================

use "$project/data/cleaned/full_sample.dta", clear

global controls "GDP_growth Inflation Pop_growth Urbanization Trade_openness"

reghdfe YUR_total Aging $controls, absorb(country_code year) vce(cluster country_code)

gen base_sample = e(sample)

* Part 1: Baseline

reghdfe YUR_total Aging $controls if base_sample==1, absorb(country_code year) vce(cluster country_code)

est store base_total

reghdfe YUR_male Aging $controls if base_sample==1, absorb(country_code year) vce(cluster country_code)

est store base_male

reghdfe YUR_female Aging $controls if base_sample==1, absorb(country_code year) vce(cluster country_code)

est store base_female

* Part 2: Replace Independent Variable (Aging 65+)

reghdfe YUR_total Aging_65up $controls if base_sample==1, absorb(country_code year) vce(cluster country_code)

est store replaceX_total

reghdfe YUR_male Aging_65up $controls if base_sample==1, absorb(country_code year) vce(cluster country_code)

est store replaceX_male

reghdfe YUR_female Aging_65up $controls if base_sample==1, absorb(country_code year) vce(cluster country_code)

est store replaceX_female

* Part 3: Replace Dependent Variable (NEET Rate)

reghdfe NEET_total Aging $controls if base_sample==1, absorb(country_code year) vce(cluster country_code)

est store replaceY_total

reghdfe NEET_male Aging $controls if base_sample==1, absorb(country_code year) vce(cluster country_code)

est store replaceY_male

reghdfe NEET_female Aging $controls if base_sample==1, absorb(country_code year) vce(cluster country_code)

est store replaceY_female

* Part 4: 5% Winsorization

foreach var of varlist YUR_total YUR_male YUR_female NEET_total NEET_male NEET_female Aging Aging_65up GDP_growth Inflation Pop_growth Urbanization Trade_openness {

gen `var'_orig = `var'

}

winsor2 YUR_total YUR_male YUR_female NEET_total NEET_male NEET_female Aging Aging_65up GDP_growth Inflation Pop_growth Urbanization Trade_openness, cuts(2.5 97.5) replace

reghdfe YUR_total Aging $controls if base_sample==1, absorb(country_code year) vce(cluster country_code)

est store winsor_total

reghdfe YUR_male Aging $controls if base_sample==1, absorb(country_code year) vce(cluster country_code)

est store winsor_male

reghdfe YUR_female Aging $controls if base_sample==1, absorb(country_code year) vce(cluster country_code)

est store winsor_female

* Export Robustness Table

esttab base_total base_male base_female ///

replaceX_total replaceX_male replaceX_female ///

replaceY_total replaceY_male replaceY_female ///

winsor_total winsor_male winsor_female ///

using "$project/output/Table8_Robustness_Checks.rtf", ///

replace b(3) se(3) star(* 0.1 ** 0.05 *** 0.01) ///

title("Table 8: Robustness Checks") ///

mtitles("Total" "Male" "Female" "Total" "Male" "Female" "Total" "Male" "Female" "Total" "Male" "Female") ///

mgroups("Baseline" "Replace IV" "Replace DV" "5% Trim", pattern(1 0 0 1 0 0 1 0 0 1 0 0)) ///

keep(Aging Aging_65up) ///

varlabels(Aging "Aging" Aging_65up "Aging 65+") ///

stats(N r2 N_clust, fmt(0 3 0) labels("Observations" "R-squared" "Number of Countries")) ///

addnotes("Note: Dependent variable for 'Replace DV' columns is NEET Rate. Country and year fixed effects are included. *** p<0.01, ** p<0.05, * p<0.1.") ///

width(\hsize) nonumber

* ============================================================================

* Instrumental Variables (IV - 2SLS)

* ============================================================================

use "$project/data/cleaned/full_sample.dta", clear

global controls "GDP_growth Inflation Pop_growth Urbanization Trade_openness"

sort country_code year

by country_code: gen Aging_lag1 = Aging[_n-1] if year == year[_n-1] + 1

by country_code: gen Aging_lag2 = Aging[_n-2] if year == year[_n-2] + 2

reghdfe YUR_total Aging $controls, absorb(country_code year) vce(cluster country_code)

gen base_sample = e(sample)

* Total Sample - Lag 1 & 2

ivreghdfe YUR_total (Aging = Aging_lag1) $controls if base_sample==1, absorb(country_code year) cluster(country_code) first

est store iv_total_lag1

ivreghdfe YUR_total (Aging = Aging_lag2) $controls if base_sample==1, absorb(country_code year) cluster(country_code) first

est store iv_total_lag2

* Male Sample - Lag 1 & 2

ivreghdfe YUR_male (Aging = Aging_lag1) $controls if base_sample==1, absorb(country_code year) cluster(country_code) first

est store iv_male_lag1

ivreghdfe YUR_male (Aging = Aging_lag2) $controls if base_sample==1, absorb(country_code year) cluster(country_code) first

est store iv_male_lag2

* Female Sample - Lag 1 & 2

ivreghdfe YUR_female (Aging = Aging_lag1) $controls if base_sample==1, absorb(country_code year) cluster(country_code) first

est store iv_female_lag1

ivreghdfe YUR_female (Aging = Aging_lag2) $controls if base_sample==1, absorb(country_code year) cluster(country_code) first

est store iv_female_lag2

* Export IV Table

esttab iv_total_lag1 iv_total_lag2 iv_male_lag1 iv_male_lag2 iv_female_lag1 iv_female_lag2 ///

using "$project/output/Table9_IV_Estimation.rtf", ///

replace b(3) se(3) star(* 0.1 ** 0.05 *** 0.01) ///

title("Table 9: Instrumental Variable (IV) Estimation using Lagged Aging") ///

mtitles("Total L1" "Total L2" "Male L1" "Male L2" "Female L1" "Female L2") ///

mgroups("Total" "Male" "Female", pattern(1 0 1 0 1 0)) ///

keep(Aging $controls) ///

varlabels( ///

Aging "Aging" ///

GDP_growth "GDP Growth" ///

Inflation "Inflation" ///

Pop_growth "Pop Growth" ///

Urbanization "Urbanization" ///

Trade_openness "Trade Openness") ///

stats(N N_clust r2 rkf, fmt(0 0 3 2) labels("Observations" "Number of Countries" "R-squared" "KP F-Statistic")) ///

addnotes("Note: Dependent variable is Youth Unemployment Rate. Instrumental variables are the first lag (L1) and second lag (L2) of Aging. KP F-statistic denotes the Kleibergen-Paap rk Wald F-statistic for weak instrument test. *** p<0.01, ** p<0.05, * p<0.1.") ///

width(\hsize) nonumber
