# Supplementary material
Source: Research Square preprint supplement (doi:10.21203/rs.3.rs-9229349/v1)
Supplement: Supplementary file 2 [file 60bd659b22ffce68ae677df7.xlsx]

## Sheet: Sheet1
country	iso3	year	FP.CPI.TOTL.ZG	NE.CON.GOVT.ZS	NE.CON.PRVT.ZS	NE.CON.TOTL.ZS	NE.TRD.GNFS.ZS	NV.SRV.TOTL.ZS	NY.GDP.MKTP.KD.ZG	SE.TER.ENRR	SE.XPD.TOTL.GD.ZS	SL.SRV.EMPL.ZS	SL.TLF.ACTI.ZS	SL.TLF.ADVN.ZS	SL.UEM.1524.FE.ZS	SL.UEM.1524.MA.ZS	SL.UEM.1524.ZS	SL.UEM.NEET.FE.ME.ZS	SL.UEM.NEET.MA.ME.ZS	SL.UEM.NEET.ME.ZS	SP.POP.65UP.TO.ZS	SP.POP.DPND.OL	SP.POP.GROW	SP.URB.TOTL.IN.ZS
Afghanistan	AFG	2005	12.6863					39.0078	11.2297			25.7077	47.557		13.914	9.452	10.176	67.95	17.68	42.31	2.26975	4.76031	3.51922	19.7059
Afghanistan	AFG	2006	6.7846					39.831	5.3574			25.9421	47.601		13.894	9.451	10.182	67.939	17.626	42.276	2.27178	4.7455	4.0927	20.1105
Afghanistan	AFG	2007	8.68057					40.2947	13.8263			27.2249	47.66		13.777	9.383	10.12	67.863	17.507	42.179	2.27622	4.72855	1.8926	20.5907
Afghanistan	AFG	2008	26.4187					45.4098	3.92498			27.6622	47.729		13.752	9.386	10.137	67.89	17.482	42.18	2.28357	4.71179	2.18655	21.1241
Afghanistan	AFG	2009	-6.81116					45.2444	21.3905	3.93816		29.3948	47.804		13.602	9.298	10.056	67.808	17.357	42.071	2.29354	4.69717	3.64638	21.6885
Afghanistan	AFG	2010	2.17854					48.8794	14.3624		3.47945	31.1593	47.885		13.535	9.269	10.041	67.687	17.304	41.979	2.30661	4.68576	2.93469	22.2615
Afghanistan	AFG	2011	11.8042					49.6968	0.426355	3.68686	3.46201	31.1178	47.969		13.494	9.259	10.044	67.66	17.332	41.974	2.32214	4.67815	3.6915	22.8206
Afghanistan	AFG	2012	6.44121					50.5794	12.7523		2.6042	32.3133	48.056		13.487	9.271	10.071	67.514	17.02	41.736	2.33791	4.67052	4.04786	23.3434
Afghanistan	AFG	2013	7.38577					52.6827	5.60074		3.45446	32.0764	48.154		13.455	9.262	10.104	67.329	16.848	41.549	2.34977	4.65404	3.41823	23.8077
Afghanistan	AFG	2014	4.674					52.9909	2.72454	8.39764	3.69522	32.2392	48.248	84.292	13.368	9.21	10.094	67.138	16.679	41.36	2.35654	4.62697	3.63252	24.191
Afghanistan	AFG	2015	-0.661709					53.2353	1.45131		3.2558	33.7321	48.339		16.028	11.522	12.534	67.423	17.455	41.887	2.3567	4.58644	3.11996	24.4649
Afghanistan	AFG	2016	4.38389					59.0232	2.26031		4.54397	35.2398	48.429		18.615	13.789	14.932	67.687	18.177	42.379	2.3555	4.54352	2.53572	24.6588
Afghanistan	AFG	2017	4.97595					58.3291	2.647		4.34319	36.8021	48.521	64.677	21.157	16.031	17.31	67.928	18.846	42.84	2.35974	4.51403	2.80834	24.8353
Afghanistan	AFG	2018	0.626149					59.4774	1.18923	9.99592		37.0167	46.758		20.559	15.075	16.402	67.955	18.567	42.722	2.36712	4.49397	2.91081	24.9992
Afghanistan	AFG	2019	2.30237					55.4728	3.9116			37.5135	44.982		20.021	14.156	15.52	67.942	18.246	42.56	2.37615	4.47934	2.98439	25.1437
Afghanistan	AFG	2020	5.60189	22.1092	92.3033	114.413	46.7099	52.5721	-2.3511	10.8544		35.5353	42.596	57.91	21.237	14.449	16.053	75.591	32.851	53.764	2.37073	4.43915	3.15361	25.2622
Afghanistan	AFG	2021	5.1332	21.2624	88.4783	109.741	51.4117	47.1604	-20.7388			30.1516	41.751	64.051	21.231	14.704	16.013	74.216	30.32	51.802	2.35255	4.37771	2.3561	25.3479
Afghanistan	AFG	2022	13.7121	21.8455	97.6115	119.457	72.8855	45.0499	-6.24017			29.4272	38.612		30.212	16.474	17.539	83.932	29.369	56.063	2.35514	4.35613	1.4357	25.3939
Afghanistan	AFG	2023	-4.64471	21.2145	98.071	119.286	67.5847	46.3744	2.26694			29.4985	38.567		30.133	16.435	17.494	83.965	29.249	55.995	2.37754	4.37078	2.13559	25.4731
Afghanistan	AFG	2024	-6.60119									29.5022	38.533		29.719	16.192	17.235	83.992	28.957	55.84	2.40097	4.38842	2.83657	25.7007
Afghanistan	AFG	2025										29.4719	38.448		28.496	15.814	16.785	84.056	28.67	55.713
Albania	ALB	2005	2.36658	11.0833	74.763	85.8463	69.1163	40.3981	5.13082	22.389	3.28155	36.3588	63.342	65.015	24.765	27.433	26.243	36.226	34.123	35.186	8.95908	13.7471	-0.51179	45.9938
Albania	ALB	2006	2.37073	10.555	75.2908	85.8458	72.2019	40.1992	6.01898	26.2101	3.19146	37.0819	62.414		24.448	27.003	25.877	34.191	31.1	32.648	9.36032	14.2664	-0.630911	47.0701
Albania	ALB	2007	2.93268	10.3859	79.5955	89.9814	79.9119	40.5452	6.50009	30.2319	3.27593	37.3182	61.477	79.188	25.119	27.826	26.645	32.247	28.518	30.37	9.7746	14.8025	-0.755719	48.2023
Albania	ALB	2008	3.32087	10.705	82.0726	92.7776	75.2485	41.075	6.90706	31.684		37.541	60.521	78.904	26.858	26.412	26.605	30.932	25.466	28.166	10.1805	15.3192	-0.767343	49.3851
Albania	ALB	2009	2.26692	11.5158	80.0758	91.5916	73.3214	42.004	2.69075	32.924		36.5546	62.932	81.301	28.521	26.488	27.357	36.199	25.438	30.734	10.5634	15.7883	-0.673894	50.6132
Albania	ALB	2010	3.6271	11.6894	76.1306	87.8201	75.5325	41.3132	2.97315	43.3279		38.0057	63.347	77.97	31.993	30.102	30.867	33.726	25.849	29.72	10.9201	16.2057	-0.496462	51.8816
Albania	ALB	2011	3.42807	11.873	76.8794	88.7524	80.699	42.239	2.46352	49.3997	3.17881	35.7883	68.097	74.517	19.507	24.857	22.697	32.48	27.62	30.011	11.2282	16.5497	-0.269017	53.2917
Albania	ALB	2012	2.03159	11.7429	77.2889	89.0318	76.9684	43.5059	0.98413	58.6214	3.29534	36.8368	64.417	73.064	23.062	32.438	28.871	29.532	25.824	27.654	11.5093	16.8762	-1.54314	53.8638
Albania	ALB	2013	1.93762	11.7677	77.1875	88.9552	75.7506	42.6288	1.70723	63.8441	3.5393	38.7158	59.711	73.427	27.027	33.412	31.207	32.102	29.876	30.977	11.8201	17.2845	-1.54314	54.298
Albania	ALB	2014	1.62587	12.2746	78.3051	90.5797	75.0212	42.6576	2.24023	65.5507	3.18178	39.6694	61.319	74.381	32.583	43.321	39.554	32.642	30.165	31.392	12.1668	17.7755	-1.54314	54.7326
Albania	ALB	2015	1.89617	11.6996	77.6278	89.3273	71.2794	42.8779	2.2277	61.9608	3.43797	39.8608	64.087	73.271	40.195	39.3	39.628	31.224	28.432	29.816	12.5431	18.3209	-1.54312	55.1579
Albania	ALB	2016	1.27543	12.105	77.7555	89.8606	74.0145	43.4482	3.90894	58.4885	3.96209	40.2112	66.179	74.125	34.011	37.257	35.918	27.608	27.178	27.391	12.9202	18.8689	-1.54313	55.5739
Albania	ALB	2017	1.98666	11.851	75.2752	87.1262	76.7874	44.5621	3.28318	58.0178	3.61172	42.2423	66.919	73.225	27.386	33.662	31.184	27.499	24.985	26.227	13.3054	19.4491	-1.54315	55.9803
Albania	ALB	2018	2.02806	11.8666	74.4741	86.3408	75.6941	44.397	3.67142	56.0803	3.08201	42.7084	68.305	72.099	25.773	29.554	28.109	27.752	25.512	26.614	13.7395	20.1296	-1.5431	56.377
Albania	ALB	2019	1.41109	12.676	75.5463	88.2223	75.3821	45.4534	2.06258	61.4085	3.87019	43.2159	69.662	75.465	25.97	27.588	26.942	25.445	26.187	25.824	14.2481	20.9508	-1.54314	56.7639
Albania	ALB	2020	1.62089	13.6673	74.5535	88.2208	59.5207	45.7213	-3.31376	61.5853	3.32504	43.2415	69.039	75.903	25.781	26.825	26.422	26.459	27.403	26.943	14.767	21.8089	-1.54316	57.1409
Albania	ALB	2021	2.04147	12.9573	71.6947	84.652	75.5904	45.2788	8.96958	59.9699	3.00556	44.427	69.319	75.947	29.497	25.357	27.089	26.032	22.251	24.084	15.266	22.6611	-1.54312	57.5077
Albania	ALB	2022	6.7252	12.1443	71.3572	83.5015	84.698	46.2991	4.8268	62.6479	2.72977	43.9962	73.168	77.472	25.725	23.683	24.543	25.755	21.811	23.714	15.7763	23.5463	-1.54316	57.8643
Albania	ALB	2023	4.75835	12.1218	69.9538	82.0756	82.3525	47.665	4.01542	64.7294	3.09153	46.3125	75.467	82.056	26.421	24.686	25.41	24.081	22.305	23.16	16.302	24.4569	-1.54311	58.2106
Albania	ALB	2024	2.21587	12.4199	69.5135	81.9334	79.4546	48.69	4.04593	81.9986		46.7791	76.156		26.589	24.859	25.582	24.192	22.395	23.258	16.9228	25.549	-1.54314	58.5464
Albania	ALB	2025										47.2444	77.003		25.858	25.358	25.567	24.302	22.484	23.355
Algeria	DZA	2005	1.38245	12.4254	34.4975	46.9228	66.8405	39.5234	5.4	20.7099		52.7471	46.099		30.057	31.452	31.243	42.811	16.697	29.29	4.75825	7.18225	1.46331	63.6599
Algeria	DZA	2006	2.3115	11.9514	32.0735	44.0249	65.9153	38.3696	2.9	21.3458		53.7389	46.007		25.904	24.137	24.398	42.334	13.89	27.614	4.81277	7.20824	1.54127	64.4154
Algeria	DZA	2007	3.679	12.3882	32.1455	44.5336	67.5455	39.7143	3.1	23.5956		54.7655	45.945		33.432	27.005	27.939	42.284	14.898	28.113	4.85271	7.22513	1.66907	65.1691
Algeria	DZA	2008	4.85859	13.7658	30.4314	44.1972	71.0285	39.5736	2.5		4.11142	55.7369	45.92		33.756	22.88	24.431	41.399	12.976	26.688	4.87581	7.22931	1.81885	65.9015
Algeria	DZA	2009	5.73706	16.3716	36.6743	53.0458	64.2848	46.1375	1.2	30.5015		56.8663	45.934		35.283	19.58	21.78	40.537	11.401	25.45	4.88611	7.22729	1.91589	66.5097
Algeria	DZA	2010	3.91106	16.9633	33.2646	50.2279	63.4912	43.6024	4.8	30.7344	8.69177	57.6166	46.254		38.099	19.311	22.161	39.272	10.818	24.53	4.89359	7.23388	1.94706	67.1235
Algeria	DZA	2011	4.52421	20.1129	30.3772	50.4901	62.2201	44.6513	3	32.3866	9.12453	58.3707	46.11		35.781	20.463	22.803	37.708	15.123	26	4.90949	7.26595	1.95689	67.7344
Algeria	DZA	2012	8.89145	19.7503	31.9594	51.7097	60.7576	44.9115	2.4	33.5571	7.02951	59.0535	45.948		40.76	25.528	27.872	35.341	10.968	22.7	4.94225	7.33902	1.99281	68.3421
Algeria	DZA	2013	3.25424	18.5351	34.4352	52.9703	59.151	46.7934	2.6	35.4386	6.65906	59.6929	45.779		41.468	22.513	25.459	35.047	8.914	21.5	5.00012	7.47152	2.01953	68.9464
Algeria	DZA	2014	2.91693	18.9933	35.7928	54.7861	56.9235	47.9036	4.1	36.0428	6.5489	59.5848	45.593		39.723	23.04	25.664	34.942	11.48	22.8	5.08618	7.66466	2.03787	69.5469
Algeria	DZA	2015	4.78445	20.5245	39.8443	60.3687	53.2046	52.1104	3.2	38.2445	6.17633	60.0079	45.534		45.213	27.398	30.377	32.258	10.853	21.2	5.19674	7.9023	2.05625	70.1433
Algeria	DZA	2016	6.39769	20.0218	41.1242	61.146	49.7609	52.394	3.9	43.9041	6.50211	60.1186	45.509		44.59	22.831	26.228	31.607	9.944	20.435	5.3259	8.17182	2.05569	70.7354
Algeria	DZA	2017	5.59112	18.829	42.0568	60.8859	49.8208	51.2221	1.5	49.1777	5.73482	58.8562	45.611		46.427	27.316	30.295	31.603	10.91	20.95	5.46724	8.46491	2.032	71.3228
Algeria	DZA	2018	4.26999	17.4037	41.7294	59.1331	52.4362	49.4261	1.4	52.8819	5.81275	58.755	45.679		46.844	27.731	30.709	30.537	10.685	20.336	5.61801	8.77252	1.93781	71.9052
Algeria	DZA	2019	1.95177	18.261	42.8004	61.0614	46.5068	50.4801	0.9	53.8645	5.57537	58.7774	45.709		47.369	28.222	31.202	30.168	10.504	20.084	5.77498	9.08218	1.84041	72.4825
Algeria	DZA	2020	2.41513	19.8032	46.5668	66.37	40.3898	52.8042	-5	53.3752	6.19392	58.2762	41.291		54.36	32.36	35.767	30.321	11.858	20.869	5.89409	9.31674	1.71191	73.0541
Algeria	DZA	2021	7.22606	18.4286	42.3734	60.8021	46.8371	48.488	3.8	54.2223	5.51403	58.2199	41.785		50.939	30.646	33.828	30.04	11.101	20.36	6.01404	9.53564	1.61936	73.6199
Algeria	DZA	2022	9.26552	16.5401	37.9689	54.509	51.1901	42.7463	3.6	53.3876	4.74925	58.0537	45.545		47.469	28.413	31.359	29.86	10.321	19.89	6.18696	9.82497	1.58758	74.1796
Algeria	DZA	2023	9.32217	17.9064	40.6364	58.5428	43.7398	45.5477	4.1	55.532	5.61016	58.1913	45.346		45.735	27.065	29.995	29.969	9.559	19.56	6.37686	10.1246	1.49898	74.7328
Algeria	DZA	2024	4.04611	18.0568	41.275	59.3317	40.1346	46.795	3.7	54.4283		58.2134	45.084		45.56	26.931	29.884	30.092	9.592	19.632	6.58221	10.4333	1.39839	75.2793
Algeria	DZA	2025										58.2543	44.788		45.003	26.513	29.444	30.215	9.625	19.704
American Samoa	ASM	2005			73.4		223.2		-0.408163												3.78243	6.39021	-0.354388	87.7798
American Samoa	ASM	2006			76.0649		229.817		-4.09836		14.717										3.83773	6.43942	-0.430123	87.4984
American Samoa	ASM	2007			74.1313		218.147		1.85185												3.88234	6.46732	-0.464054	87.2018
American Samoa	ASM	2008			72.6786		249.821		-2.65734												3.92097	6.48573	-0.509198	86.9002
American Samoa	ASM	2009			58.963		161.333		-4.16667												3.95296	6.49677	-0.538814	86.6036
American Samoa	ASM	2010			69.9825		157.941		0.29985												4.04592	6.59639	-0.541733	86.3191
American Samoa	ASM	2011			72.1053		157.544		0												4.22439	6.8242	-0.60478	86.0285
American Samoa	ASM	2012			65.625		176.406		-4.33483												4.43117	7.10334	-0.742342	85.7161
American Samoa	ASM	2013			69.906		173.824		-2.5												4.66337	7.44024	-0.890369	85.3846
American Samoa	ASM	2014			72.0062		174.806		1.76282												4.90686	7.80743	-1.00492	85.0351
American Samoa	ASM	2015			68.3507		162.407		3.14961												5.14203	8.15953	-1.10586	84.6687
American Samoa	ASM	2016			69.0015		159.165		-1.67939												5.37664	8.50928	-1.20432	84.2863
American Samoa	ASM	2017			76.9608		161.438		-6.98758												5.61393	8.86142	-1.26939	83.889
American Samoa	ASM	2018			76.2128		171.831		2.67112												5.85069	9.21097	-1.32302	83.478
American Samoa	ASM	2019			78.6708		156.569		-0.487805												6.08357	9.55779	-1.38258	83.0542
American Samoa	ASM	2020			73.9251		154.369		4.41176												6.36536	9.95036	-0.896275	82.6241
American Samoa	ASM	2021			80.2667		136.8		-0.782473												6.71915	10.4281	-1.08299	82.2127
American Samoa	ASM	2022			71.2974		124.684		1.73502												7.10363	10.9572	-1.81009	81.7948
American Samoa	ASM	2023																			7.55035	11.6271	-1.7129	81.3722
American Samoa	ASM	2024																			8.04448	12.386	-1.60367	80.9447
Andorra	AND	2005						74.4199	5.3978	8.45697	1.64497										11.9161	16.2937	4.08107	89.9564
Andorra	AND	2006						74.1243	4.80869	9.93558	2.2449										11.8282	16.1552	2.75676	89.3789
Andorra	AND	2007						74.5593	1.55319		2.10469										11.9166	16.2476	2.83925	89.05
Andorra	AND	2008						75.3641	-5.55919	11.0231	2.87393										12.1679	16.6029	1.95686	88.9407
Andorra	AND	2009						76.0356	-5.30285		3.14292										12.5513	17.1983	0.469583	88.8443
Andorra	AND	2010						76.9912	-1.97496		2.97663										12.7438	17.6291	-3.86697	88.7605
Andorra	AND	2011						77.3751	-0.00806975		2.98706										12.6911	17.6728	-3.689	88.6888
Andorra	AND	2012						76.8249	-4.97444	12.8702	2.56578										12.6786	17.6588	-1.22756	88.6291
Andorra	AND	2013						78.0216	-3.5476	14.5405	2.50616										12.7504	17.7826	-2.15758	88.5809
Andorra	AND	2014						78.2437	2.50447	13.54	3.07421										12.8606	17.9453	-1.95667	88.544
Andorra	AND	2015						78.6674	1.43414	13.8207	3.28035										12.9258	18.0135	-2.14248	88.5181
Andorra	AND	2016						78.1009	3.70968	15.2011	3.23707										13.0179	18.1075	0.00969831	88.5027
Andorra	AND	2017						77.8689	0.346072	15.6665	3.21709										13.1984	18.32	2.16804	88.4977
Andorra	AND	2018						77.6558	1.58877	15.7132	3.24672										13.4862	18.6558	1.87885	88.5081
Andorra	AND	2019						77.5555	2.01555	15.4353	3.15061										13.8257	19.081	1.7305	88.5392
Andorra	AND	2020						79.8154	-11.1839	15.2606	2.63213										14.2169	19.6411	1.17775	88.5908
Andorra	AND	2021						79.3819	8.28678	15.4118	2.38192										14.598	20.1746	1.26363	88.6627
Andorra	AND	2022						78.1918	9.56461	34.6414	2.64728										14.9689	20.6827	1.69677	88.7549
Andorra	AND	2023						78.311	2.58355	62.4107	1.89868										15.4182	21.3162	1.43375	88.8202
Andorra	AND	2024						77.589	3.37182	67.6768											15.9457	22.0956	1.32931	88.885
Angola	AGO	2005	22.9535	17.2899	32.591	49.8809	95.3415	35.4993	14.1548	2.63856	2.12011	58.4651	77.82		38.887	37.089	38.018	31.497	20.908	26.231	2.74989	5.28176	3.64627	56
Angola	AGO	2006	13.3052	16.5479	30.2415	46.7894	84.6246	37.144	11.8418	2.55977	2.28146	56.6876	77.835		38.51	36.702	37.636	31.329	20.709	26.046	2.74799	5.27331	3.68489	56.8939
Angola	AGO	2007	12.2515	16.7687	31.1636	47.9323	97.2256	34.0968	13.0027			54.8911	77.861		38.389	36.577	37.512	31.127	20.502	25.839	2.7435	5.26137	3.74258	57.7565
Angola	AGO	2008	12.4758	18.201	29.3707	47.5717	108.68	34.2213	10.7866			53.1497	77.884		38.576	36.774	37.703	31.043	20.397	25.744	2.73835	5.25061	3.77829	58.5852
Angola	AGO	2009	13.7303	20.6806	37.6711	58.3517	102.263	46.6572	1.99559			51.3263	77.877	69.126	39.063	37.308	38.213	31.13	20.449	25.812	2.73339	5.24219	3.80156	59.3775
Angola	AGO	2010	14.4697	18.0528	35.3924	53.4452	90.9941	40.4059	5.29367		3.42132	48.8556	77.883		39.533	37.824	38.705	32.782	21.72	27.273	2.7299	5.23673	3.8511	60.131
Angola	AGO	2011	13.4825	19.6109	33.8188	53.4296	89.0369	37.8278	3.59387	6.44004		46.5492	77.867	89.106	40.245	37.771	39.007	34.534	22.278	28.431	2.72826	5.23436	3.88795	60.8432
Angola	AGO	2012	10.2779	19.2206	34.6962	53.9168	81.9395	38.1529	8.50312		3.08191	44.4213	77.635		38.511	36.884	37.697	35.044	23.001	29.047	2.72627	5.23169	3.88358	61.5114
Angola	AGO	2013	8.77781	23.2188	36.6726	59.8914	77.3498	40.5014	4.88306	9.2234	4.43895	42.438	77.402		37.114	36.349	36.731	35.64	23.847	29.767	2.71903	5.21918	3.84998	62.1333
Angola	AGO	2014	7.28039	19.2372	47.4408	66.678	69.5801	44.0532	4.65572			40.3316	77.165	68.655	35.692	35.793	35.743	36.473	24.724	30.622	2.70449	5.19399	3.73273	62.7231
Angola	AGO	2015	9.35597	17.5157	56.0572	73.5729	54.9794	48.0419	0.763178	8.78321	3.4869	40.3215	76.926		34.619	35.624	35.122	34.399	23.777	29.109	2.69128	5.17212	3.60507	63.5157
Angola	AGO	2016	30.6944	14.7724	52.7906	67.5629	47.0156	46.7231	-1.70053	9.78288	2.75494	40.114	76.686		33.516	35.446	34.483	32.25	22.757	27.521	2.68501	5.16028	3.57644	64.2992
Angola	AGO	2017	29.8445	12.514	53.053	65.5669	45.6643	46.619	-0.149396		2.46688	40.0179	76.444		32.296	35.151	33.725	30.25	21.78	26.03	2.68524	5.15759	3.54061	65.0851
Angola	AGO	2018	19.6289	10.3391	51.8854	62.2244	58.9165	43.9575	-0.594411		2.18351	39.7773	76.201		30.967	34.735	32.855	28.304	20.835	24.582	2.69304	5.16801	3.45323	65.8732
Angola	AGO	2019	17.081	10.9876	50.7307	61.7184	60.7148	43.8627	-0.20468		2.07306	39.6662	75.958	91.492	29.501	34.15	31.832	26.136	19.688	22.922	2.70798	5.18976	3.38788	66.6638
Angola	AGO	2020	22.2715	11.4462	60.1025	71.5486	54.3442	45.3592	-4.04245		2.66745	38.2191	74.268		30.731	35.352	33.076	26.884	20.279	23.591	2.72561	5.21599	3.26796	67.4568
Angola	AGO	2021	25.7543	10.6325	56.0096	66.6421	61.5262	42.6412	2.10275		2.2972	37.5749	77.388	92.779	27.627	32.636	30.171	22.507	20.767	21.639	2.7447	5.24338	3.18132	68.2524
Angola	AGO	2022	21.3553	11.0016	59.6841	70.6857	55.2548	43.7735	4.216		2.38536	40.4878	76.224		26.924	27.359	27.143	26.018	23.509	24.766	2.77334	5.28569	3.14303	69.0506
Angola	AGO	2023	13.6441	11.4124	64.6608	76.0732	53.0335	41.8052	1.26331	10.0494	2.51274	40.5263	75.784		26.574	27.084	26.834	26.025	23.331	24.68	2.81145	5.34331	3.08066	69.8515
Angola	AGO	2024	28.2405	10.6815	66.7826	77.4642	50.8422	41.0552	4.42391	9.95491		40.6876	75.795		26.48	26.99	26.74	26.128	23.347	24.739	2.85242	5.40266	3.0442	70.6551
Angola	AGO	2025										40.8515	75.71		26.666	27.767	27.229	26.231	23.365	24.799
Antigua and Barbuda	ATG	2005	2.09875					75.4203	6.47369												7.10773	10.6085	1.12677	29.1738
Antigua and Barbuda	ATG	2006	1.78779					71.5729	12.7081												7.06292	10.4595	1.2396	28.4353
Antigua and Barbuda	ATG	2007	1.41605					71.1681	9.31518												7.04066	10.3576	1.35547	27.7201
Antigua and Barbuda	ATG	2008	5.33381					70.933	-0.0140066												7.03879	10.2948	1.46768	27.0586
Antigua and Barbuda	ATG	2009	-0.55016					71.4897	-11.9629	14.893	2.22276										7.06462	10.2834	1.50944	26.4808
Antigua and Barbuda	ATG	2010	3.37003					73.6586	-7.84051	16.6952											7.15361	10.353	1.35347	26.017
Antigua and Barbuda	ATG	2011	3.45675					75.056	-1.95874	15.1061											7.29741	10.4993	1.17914	25.6947
Antigua and Barbuda	ATG	2012	3.37688					72.6759	3.37314	25.1156	2.13043										7.46505	10.6808	1.06918	25.4556
Antigua and Barbuda	ATG	2013	1.0595					74.1366	-0.600982		2.35972										7.64667	10.8868	0.917166	25.2476
Antigua and Barbuda	ATG	2014	1.08944				141.546	73.9445	2.19829		2.30444										7.85107	11.1369	0.792861	25.09
Antigua and Barbuda	ATG	2015	0.968993				130.072	73.0844	1.42162		1.99348										8.11104	11.4676	0.722892	25
Antigua and Barbuda	ATG	2016	-0.489438				132.026	71.1512	4.12037		2.1715										8.44513	11.9093	0.624382	24.924
Antigua and Barbuda	ATG	2017	2.43249				127.664	70.2894	2.71273		2.28158										8.79869	12.3932	0.553103	24.85
Antigua and Barbuda	ATG	2018	1.20716				130.655	67.9049	6.712		2.26923			84.912							9.1272	12.8404	0.504979	24.7781
Antigua and Barbuda	ATG	2019	1.43136				137.538	68.4306	3.17222		3.35726										9.47315	13.3199	0.480554	24.7083
Antigua and Barbuda	ATG	2020	0.62599				94.2895	67.8301	-18.8688		3.00518										9.86325	13.8859	0.526173	24.6406
Antigua and Barbuda	ATG	2021	2.063				101.075	68.4401	8.17286		2.50897										10.2789	14.5031	0.546162	24.575
Antigua and Barbuda	ATG	2022	7.53108				117.704	68.4082	9.10781		2.50369										10.7287	15.1761	0.53027	24.5114
Antigua and Barbuda	ATG	2023	5.06714					69.0617	2.42736		3.10505										11.2388	15.9322	0.5114	24.45
Antigua and Barbuda	ATG	2024	6.19887						3.65639												11.7845	16.7363	0.487472	24.3907
Argentina	ARG	2005		12.1419	63.0294	75.1713	40.5513	48.4861	8.85166	63.4893	3.86001	68.5869	68.458	84.369	30.653	23.239	26.207	24.553	15.373	19.874	9.96523	15.7937	1.02746	90.1234
Argentina	ARG	2006		12.4294	63.2702	75.6996	40.4335	48.7491	8.04715	66.9445	4.12821	68.5997	68.826	84.953	29.202	19.944	23.777	24.896	14.333	19.509	10.0447	15.8707	1.02825	90.3034
Argentina	ARG	2007		12.9893	62.5312	75.5206	40.9452	49.5083	9.00765	66.6672	4.4626	68.6557	68.282		24.362	17.391	20.242	24.507	14.226	19.261	10.1165	15.9339	0.991102	90.4797
Argentina	ARG	2008		13.6335	63.0746	76.7081	40.4027	50.2552	4.05723	68.5611	4.84441	68.7483	67.727	83.852	22.118	16.765	18.927	24.497	14.556	19.421	10.1938	16.0118	1.01289	90.6522
Argentina	ARG	2009		15.9039	62.9781	78.882	34.0571	53.306	-5.91853	70.6932	5.53105	69.6003	68.087	83.878	24.521	19.004	21.184	24.41	15.847	20.036	10.2963	16.1379	1.05977	90.8209
Argentina	ARG	2010		15.1637	64.2341	79.3978	34.971	51.4952	10.1254	73.8037	5.01971	69.7073	67.539	83.842	23.565	16.727	19.381	24.333	14.794	19.459	10.4021	16.2743	1.05636	90.993
Argentina	ARG	2011		15.689	64.2203	79.9093	35.2062	51.8119	6.00395	77.0101	5.29063	69.0724	68.14	83.641	22.086	16.61	18.71	23.068	13.942	18.405	10.5161	16.4339	1.06474	91.1072
Argentina	ARG	2012		16.6454	64.9034	81.5488	30.5265	53.6581	-1.02642	78.1465	5.34583	69.4876	68.062	82.469	23.025	15.452	18.34	23.185	13.832	18.406	10.6423	16.6177	1.02766	91.2041
Argentina	ARG	2013		16.8062	65.9876	82.7938	29.3339	53.9191	2.40532	78.5682	5.43661	69.2982	67.663	82.649	23.28	17.281	19.555	23.984	14.367	19.07	10.7672	16.802	0.992959	91.3015
Argentina	ARG	2014		16.9499	65.3831	82.333	28.4068	52.9405	-2.51262	81.0726	5.36144	69.0305	66.941	82.21	22.271	17.153	19.137	24.451	15.104	19.675	10.8941	16.9977	1.03174	91.3975
Argentina	ARG	2015		18.0984	65.9058	84.0042	22.4862	55.8149	2.73116	83.7557	5.77611	69.653	66.771		23.714	18.077	20.267	23.884	15.304	19.5	11.0315	17.2149	1.04726	91.4923
Argentina	ARG	2016		17.6546	65.7219	83.3765	26.0939	56.1222	-2.08033	86.6744	5.54549	70.4877	66.599		25.592	19.382	21.799	23.382	15.65	19.431	11.1688	17.4285	0.968911	91.5857
Argentina	ARG	2017		17.6969	66.7396	84.4365	25.2896	57.3499	2.8185	89.3297	5.45432	71.0992	66.422	79.033	26.947	20.22	22.843	22.834	15.813	19.246	11.3071	17.636	0.88125	91.6776
Argentina	ARG	2018	34.2772	15.8051	69.4702	85.2753	30.7625	56.3698	-2.6174	91.0847	4.87774	71.4909	67.403	79.577	27.869	21.12	23.845	22.599	15.602	19.023	11.4637	17.8664	0.822969	91.768
Argentina	ARG	2019	53.5483	16.4432	66.1276	82.5708	32.6306	55.4388	-2.00086	95.1928	4.77165	71.772	68.122	80.407	28.559	24.012	25.842	21.716	16.85	19.228	11.6325	18.0994	0.710901	91.8568
Argentina	ARG	2020	42.0151	16.873	65.7047	82.5777	30.2037	54.8579	-9.90048	99.3697	5.2769	71.3067	63.716	77.242	35.019	27.238	30.429	23.693	21.024	22.328	11.7934	18.2823	0.484666	91.9439
Argentina	ARG	2021	48.4094	15.9158	62.9532	78.869	33.0787	52.834	10.4418	107.22	4.65393	71.7662	68.759	79.162	26.688	21.008	23.373	18.571	13.777	16.118	11.9186	18.3808	0.265879	92.0293
Argentina	ARG	2022	72.4308	15.7026	65.9286	81.6313	31.5802	53.5341	6.02075	107.104	4.79263	71.3172	70.054	79.559	20.723	17.745	19.004	17.845	13.991	15.872	12.0341	18.4529	0.210809	92.1128
Argentina	ARG	2023	133.489	16.3016	65.6352	81.9368	26.677	53.1991	-1.85579	107.823	5.89754	71.2233	70.886	80.3	19.379	16.867	17.946	16.738	13.4	15.028	12.203	18.6004	0.286976	92.1945
Argentina	ARG	2024	219.884	14.9168	66.6849	81.6017	27.9298	53.6514	-1.34293			71.6393	70.535	78.584	20.172	18.528	19.228	18.055	14.677	16.324	12.416	18.8178	0.34583	92.2742
Argentina	ARG	2025										71.8147	70.691		21.011	17.83	19.188	18.092	14.709	16.358
Armenia	ARM	2005	0.638928	9.71001	79.4241	89.1341	70.1397		13.9	37.7094	2.71203	42.4698	69.445		11.716	12.194	11.975	29.556	18.722	24.348	11.1166	16.4325	-0.586252	64.5334
Armenia	ARM	2006	2.89236	9.26564	76.0094	85.275	61.0301		13.2	41.5904	2.71577	43.7507	69.403		11.134	12.643	11.951	28.939	18.338	23.842	11.3035	16.5581	-0.615288	64.4759
Armenia	ARM	2007	4.40736	9.39819	75.3569	84.7551	56.975		13.7	44.4558	3.01894	44.9832	69.393	61.302	10.541	13.086	11.92	28.269	18.058	23.357	11.3129	16.4185	-0.631969	64.4258
Armenia	ARM	2008	8.94995	9.39591	75.2922	84.6881	54.5423		6.9	46.5245	3.17273	45.1175	68.892	70.5	40.664	31.38	35.614	36.029	23.709	30.112	11.153	16.0633	-0.655422	64.3841
Armenia	ARM	2009	3.40677	12.2837	84.5474	96.8311	57.2742		-14.1	49.0897	3.84079	45.0269	70.322	65.658	44.24	35.454	39.529	36.567	24.312	30.701	10.9146	15.6399	-0.685836	64.352
Armenia	ARM	2010	8.17636	12.0437	86.2569	98.3006	64.643		2.2	50.584	3.249	45.0884	70.234	68.547	44.911	31.132	37.517	36.229	22.277	29.564	10.7248	15.3275	-0.693856	64.3304
Armenia	ARM	2011	7.65001	11.9103	88.0051	99.9154	69.4356		4.7	51.2949	3.14385	45.8727	70.015	69.797	42.966	33.926	38.08	35.265	22.842	29.309	10.6449	15.2072	-0.556591	64.3207
Armenia	ARM	2012	2.55802	10.91	85.8798	96.7898	75.9617	45.6989	7.2	44.4856	2.77248	46.288	69.75	69.97	38.853	30.529	34.299	34.519	22.147	28.54	10.6602	15.2554	-0.125578	64.3268
Armenia	ARM	2013	5.78967	11.9351	86.7885	98.7236	77.555	45.7498	3.3	44.8348	2.65018	48.2957	69.811	70.175	40.453	30.647	35.034	34.571	21.802	28.346	10.7084	15.3768	-0.0694663	64.3584
Armenia	ARM	2014	2.98131	12.0859	85.5472	97.633	75.7789	47.413	3.6	47.7151	2.24724	48.4456	69.893	74.514	44.207	30.188	36.376	34.714	21.131	28.028	10.7767	15.5422	-0.271712	64.4143
Armenia	ARM	2015	3.73169	13.1116	77.9158	91.0274	71.6821	48.2127	3.2	48.7314	2.80591	48.7606	70.072	76.864	36.976	27.91	31.854	32.147	20.207	26.208	10.9238	15.8404	-0.305729	64.493
Armenia	ARM	2016	-1.40361	13.4542	76.3037	89.7578	76.078	49.9105	0.2	54.3433	2.75812	50.6168	70.421	74.624	44.512	28.999	35.657	32.73	19.855	26.252	11.1449	16.2618	-0.410213	64.5929
Armenia	ARM	2017	0.969553	12.3186	80.03	92.3485	87.2024	50.7653	7.5	55.5066	2.70759	51.9478	70.493	73.609	44.989	32.44	37.728	32.291	20.546	26.316	11.4172	16.7626	-0.432038	64.7125
Armenia	ARM	2018	2.52023	11.4867	79.8009	91.2876	92.4731	52.6163	5.2	57.4585	2.11331	48.3079	70.615	74.291	40.157	28.942	33.62	30.516	19.237	24.746	11.7117	17.2645	-0.349674	64.8503
Armenia	ARM	2019	1.44345	12.5646	83.3487	95.9133	97.847	53.9732	7.6	53.5944	2.15984	50.3593	67.884	71.007	35.098	30.949	32.613	29.585	21.512	25.461	12.0453	17.8043	-0.219169	65.0047
Armenia	ARM	2020	1.21144	14.9686	75.3356	90.3042	70.1214	53.2412	-7.2	52.3332	2.70556	52.2191	71.17	73.862	33.373	31.207	32.079	30.842	21.283	25.984	12.3433	18.2897	-0.033761	65.1742
Armenia	ARM	2021	7.18484	13.6499	71.2974	84.9472	79.2489	53.0784	5.8	56.6235	2.76785	52.9377	72.177	75.206	33.337	27.672	30.095	25.457	18.388	21.892	12.6002	18.7083	0.0270097	65.3573
Armenia	ARM	2022	8.64091	11.6765	66.8052	78.4817	103.879	55.6162	12.6	57.1818	2.4919	49.5449	68.742	70.294	30.674	23.8	26.691	27.957	21.145	24.533	12.9152	19.2126	0.232656	65.5624
Armenia	ARM	2023	1.98042	12.0992	66.3616	78.4608	123.419	60.345	8.3	56.277	2.4387	51.4646	70.412	72.326	31.325	23.734	26.736	23.245	17.151	20.177	13.211	19.6465	-0.165164	65.6957
Armenia	ARM	2024	0.269512	10.6635	68.3177	78.9813	150.065	61.9894	5.9	52.7748		51.6221	70.787		31.225	23.66	26.659	23.409	17.252	20.302	13.7028	20.4336	2.30762	65.8114
Armenia	ARM	2025										51.7297	70.814		30.572	23.444	26.244	23.58	17.358	20.426
Aruba	ABW	2005	3.39779	22.836	52.9033	75.7392	145.05	75.5411	-0.383138	36.2042	4.62322										8.13117	11.5982	2.59076	64.958
Aruba	ABW	2006	3.60802	22.323	55.0122	77.3352	141.043	73.7472	1.12741	34.2269											8.39636	11.9869	1.79664	64.8113
Aruba	ABW	2007	5.39257	21.4145	56.6887	78.1031	139.972	72.0519	3.08954	34.8968	4.70255										8.64299	12.3588	0.746665	64.6533
Aruba	ABW	2008	8.95599	21.2483	54.7002	75.9485	139.11	73.1525	1.83576	35.0971	4.8273										8.90348	12.755	0.762933	64.4889
Aruba	ABW	2009	-2.13543	24.833	57.2442	82.0773	137.557	75.7664	-11.6777	34.4309	5.7974										9.18299	13.1806	0.678451	64.323
Aruba	ABW	2010	2.07814	26.4651	60.28	86.7452	135.465	78.5445	-2.73346	36.0625	6.75109										9.48923	13.613	0.230041	64.1613
Aruba	ABW	2011	4.3163	25.1085	62.4107	87.5192	154.438	77.4233	3.36924	37.8648	5.91467										9.85086	14.0913	0.736689	63.9993
Aruba	ABW	2012	0.627472	26.1779	60.7376	86.9156	156.645	79.5391	-1.0408	38.8642	6.34729										10.2596	14.657	1.46978	63.8252
Aruba	ABW	2013	-2.37207	26.1933	58.5599	84.7532	155.732	80.1808	6.43146	17.1259	6.44296										10.6935	15.2955	1.49203	63.6383
Aruba	ABW	2014	0.421441	24.8237	57.6466	82.4703	156.491	80.2286	1.4261	17.7519	5.85128										11.1519	16.0047	1.06551	63.4393
Aruba	ABW	2015	0.474764	23.2556	55.055	78.3106	140.493	79.1391	3.61148	16.7312	5.88827										11.6404	16.7914	1.0237	63.2288
Aruba	ABW	2016	-0.931196	23.4876	54.8914	78.379	136.887	78.7311	1.23434	17.1416	5.49136										12.1632	17.6559	0.757968	63.0078
Aruba	ABW	2017	-1.02828	23.0216	55.8701	78.8916	138.717	78.9879	3.49343		4.45582										12.7168	18.5828	0.00735761	62.7768
Aruba	ABW	2018	3.62604	23.071	56.5345	79.6055	138.825	79.7291	3.21247		4.54876										13.3108	19.5829	0.158976	62.5368
Aruba	ABW	2019	4.25746	22.9089	58.994	81.9029	137.962	77.9193	1.22511		4.43504										13.942	20.648	0.270505	62.2883
Aruba	ABW	2020		29.1602	62.4604	91.6206	122.724	77.2007	-23.898												14.5767	21.7012	-0.565684	62.0029
Aruba	ABW	2021		22.8466	61.7865	84.6331	139.918	78.4104	14.7306		3.61856										15.1295	22.5907	-0.820211	61.9275
Aruba	ABW	2022		20.3645	58.8482	79.2127	160.635	79.0036	10.6364												15.7002	23.5192	-0.362774	61.8812
Aruba	ABW	2023		18.9016	51.2544	70.1561	159.019		7.7068												16.369	24.6359	0.0456517	61.8351
Aruba	ABW	2024		17.4998	47.9996	65.4995	160.365		6.81078	14.0655											17.0563	25.8045	0.590657	61.7909
Australia	AUS	2005	2.69183	18.3521	56.9427	75.2948	39.0979	64.4368	3.15548			74.51	75.434	79.869	10.341	10.877	10.619	12.057	9.259	10.63	12.885	19.131	1.21729	85.6191
Australia	AUS	2006	3.55529	18.2758	56.1158	74.3916	41.4879	63.807	2.77093			74.4938	75.836	80.648	9.47	10.539	10.026	11.557	9.045	10.273	12.9925	19.2717	1.34945	85.7493
Australia	AUS	2007	2.32761	18.1384	56.0488	74.1872	41.9297	64.3888	3.78947			74.683	76.223	79.893	9.245	9.466	9.36	11.387	8.426	9.87	13.0876	19.3982	1.825	85.8969
Australia	AUS	2008	4.3503	18.054	55.9494	74.0034	42.7522	64.5204	3.62399			74.3025	76.534	80.417	8.6	9.009	8.814	11.036	8.123	9.541	13.1773	19.5189	2.00391	86.0254
Australia	AUS	2009	1.77112	18.3714	54.0721	72.4436	45.5936	64.0981	1.95485			74.5701	76.406	86.72	10.351	12.471	11.461	12.576	10.287	11.4	13.3149	19.7258	2.06083	86.1278
Australia	AUS	2010	2.91834	18.7746	55.4535	74.2281	40.3905	65.7221	2.21005			74.7664	76.458	86.33	11.125	11.935	11.548	11.859	10.808	11.32	13.5293	20.0726	1.55571	86.2199
Australia	AUS	2011	3.30385	18.608	53.9892	72.5971	41.722	64.6278	2.39473			75.384	76.667	86.64	10.78	11.921	11.37	11.749	9.487	10.59	13.7988	20.5283	1.38953	86.3269
Australia	AUS	2012	1.76278	18.8351	53.7188	72.5539	43.0198	65.1563	3.95247			75.5497	76.449	86.86	10.955	12.449	11.728	10.401	9.441	9.91	14.088	21.0375	1.74582	86.4451
Australia	AUS	2013	2.44989	18.775	54.7819	73.5569	41.1005	66.201	2.65445			76.0132	76.424	82.58	11.355	13.032	12.22	11.816	10.26	11.02	14.3663	21.5386	1.72115	86.5741
Australia	AUS	2014	2.48792	18.6961	55.0004	73.6965	42.2993	65.6306	2.60119			76.2215	76.332	81.28	12.47	14.107	13.311	10.483	9.714	10.09	14.6344	22.0235	1.49157	86.7221
Australia	AUS	2015	1.50837	19.111	56.2476	75.3585	41.4948	67.1766	2.16435	119.679		77.2979	76.964	82.09	11.913	14.235	13.11	10.183	9.434	9.8	14.8995	22.5076	1.43922	86.8779
Australia	AUS	2016	1.27699	19.8953	57.1635	77.0587	40.8134	68.1552	2.75564	119.683		77.3913	76.969	81.42	11.398	13.815	12.642	9.016	8.379	8.69	15.1508	22.9692	1.56194	87.0166
Australia	AUS	2017	1.94865	19.8687	55.743	75.6117	42.0354	66.932	2.29331	109.993		77.9738	77.472	81.8	11.466	13.648	12.592	8.996	8.926	8.96	15.3876	23.3957	1.64683	87.1281
Australia	AUS	2018	1.9114	19.9423	55.4513	75.3936	43.5732	66.592	2.87417	103.322		77.4955	78.134	78.824	11.04	12.783	11.935	10.148	8.727	9.419	15.641	23.844	1.496	87.2268
Australia	AUS	2019	1.61077	20.2894	54.2902	74.5796	46.0017	66.0476	2.19402	109.76		78.3832	78.534	79.215	10.57	12.282	11.452	9.349	9.373	9.361	15.9451	24.3832	1.47749	87.302
Australia	AUS	2020	0.846906	21.8139	52.4647	74.2786	44.4996	66.2547	-0.133532	110.139	5.38625	78.0429	77.759	78.315	13.252	14.99	14.142	9.655	11.696	10.706	16.3387	25.0973	1.23343	87.2713
Australia	AUS	2021	2.86391	22.3669	50.9514	73.3184	40.2022	65.7262	2.00695	112.688	5.34109	78.0006	79.304	78.939	9.729	12.481	11.134	8.407	10.082	9.27	16.7492	25.8366	0.140895	87.2353
Australia	AUS	2022	6.5941	22.018	49.0537	71.0717	45.6946	63.3628	4.25305	106.241	5.05916	78.5533	80.56	78.775	7.552	9.355	8.468	8.046	8.713	8.389	17.075	26.3954	1.28931	87.3343
Australia	AUS	2023	5.59701	21.2449	50.5242	71.7691	49.0443	63.6366	3.58382	104.648		78.17	80.891	79.332	7.453	9.272	8.388	7.73	8.086	7.913	17.384	26.9162	2.43451	87.4867
Australia	AUS	2024	3.16161	22.1458	51.4329	73.5788	47.1454	66.1399	1.37341			78.4104	80.558	79.454	8.125	10.621	9.408	7.96	9.069	8.53	17.73	27.5191	1.99384	87.6021
Australia	AUS	2025										78.5307	80.614		8.433	10.727	9.61	8.028	9.122	8.59
Austria	AUT	2005	2.29914	19.4781	54.1765	73.0046	94.6748	60.1404	2.32037		5.28515	67.1522	71.273	75.864	10.409	11.856	11.178	10.135	13.49	11.842	16.2127	23.9218	0.681267	66.9798
Austria	AUT	2006	1.44155	19.3952	53.5936	72.3052	98.7857	60.2518	3.26934		5.26368	66.5941	72.209	76.376	9.88	10.193	10.046	9.432	12.947	11.22	16.6795	24.691	0.494798	67.0007
Austria	AUT	2007	2.16856	18.8623	52.3419	70.5909	101.365	59.9241	3.77522	63.8021	5.17918	67.1489	73.304	77.157	9.689	9.512	9.596	9.182	12.177	10.706	17.028	25.2382	0.324147	67.0211
Austria	AUT	2008	3.21595	19.3986	52.1655	70.9894	102.744	60.4339	1.45331	66.1984	5.29851	68.5372	73.725	75.445	8.679	8.756	8.72	9.209	11.483	10.366	17.281	25.6127	0.313041	67.0436
Austria	AUT	2009	0.506309	20.8121	53.8122	73.8985	87.6005	61.5565	-3.58626	67.9916	5.76568	69.6953	74.142	75.841	10.167	11.554	10.896	10.096	13.298	11.726	17.5314	25.991	0.261953	67.0706
Austria	AUT	2010	1.81353	20.6212	53.8378	73.9163	99.6449	61.6369	1.80898	75.0403	5.73626	69.8498	74.195	75.466	9.477	9.843	9.673	8.877	12.63	10.788	17.6592	26.1542	0.240394	67.1047
Austria	AUT	2011	3.28658	20.0232	53.7195	73.0742	105.775	61.6607	2.92747	77.2625	5.62787	69.0369	74.328	76.071	9.261	9.095	9.173	8.513	12.527	10.559	17.7361	26.2298	0.337081	67.1484
Austria	AUT	2012	2.48568	19.9902	53.8083	73.1898	105.841	61.354	0.628246	79.5471	5.51612	69.2447	74.898	76.648	9.339	9.755	9.561	8.319	11.921	10.158	17.9497	26.5685	0.455937	67.2086
Austria	AUT	2013	2.00016	20.0845	54.1171	73.4446	104.985	61.5862	-0.250726	80.9616	5.59406	69.5168	75.292	77.013	10.064	9.504	9.767	8.651	11.96	10.341	18.1994	26.9915	0.589387	67.2981
Austria	AUT	2014	1.60581	19.9848	53.887	72.9278	104.497	61.8416	0.755799	81.0196	5.49766	69.4118	75.182	76.676	10.074	10.903	10.508	8.797	12.631	10.758	18.3881	27.3181	0.781542	67.4154
Austria	AUT	2015	0.896563	19.888	53.0194	72.3442	103.118	62.1632	1.30352	82.2563	5.49145	69.7048	75.31	76.79	10.166	11.561	10.91	8.999	12.959	11.038	18.4614	27.4581	1.12099	67.5576
Austria	AUT	2016	0.891592	19.7584	52.5473	71.8097	101.573	61.7644	2.11722	82.8497	5.50954	70.0892	76.04	76.749	10.37	12.345	11.424	9.105	12.597	10.914	18.4999	27.5567	1.0814	67.7218
Austria	AUT	2017	2.08127	19.5989	52.8046	71.8948	105.556	61.856	2.27225	83.8393	5.40181	71.1478	76.185	77.229	8.881	10.949	9.971	7.533	13.173	10.454	18.6103	27.7873	0.694621	67.9051
Austria	AUT	2018	1.99838	19.4423	52.2101	71.0677	108.378	62.243	2.48422	85.8699	5.25437	70.8704	76.647	76.643	9.468	9.664	9.572	8.74	11.996	10.422	18.7626	28.0846	0.487072	68.1047
Austria	AUT	2019	1.5309	19.5313	51.7439	70.763	108.207	62.5614	1.75498	86.3234	5.23678	70.988	76.889	76.606	7.928	9.483	8.767	9.207	12.703	11.008	18.9403	28.4232	0.444674	68.3176
Austria	AUT	2020	1.38191	21.1529	49.8491	70.8996	99.9482	62.8124	-6.31826	88.7072	5.57962	71.2713	76.493	76.765	9.065	11.419	10.325	8.49	14.183	11.419	19.1698	28.8541	0.415177	68.541
Austria	AUT	2021	2.76667	21.7318	49.6709	71.4681	111.033	62.3033	4.92309	93.9401	5.48071	70.6387	77.14	76.768	12.339	11.76	12.023	10.341	14.07	12.257	19.4629	29.4105	0.435672	68.7736
Austria	AUT	2022	8.54687	20.4896	50.9602	71.4864	123.58	62.4359	5.33096	94.5117	5.27748	70.0973	77.652	79.946	10.281	10.366	10.327	10.139	14.065	12.155	19.7898	30.0463	0.956288	68.9981
Austria	AUT	2023	7.81413	20.2679	51.6954	72.2652	115.153	62.58	-0.786244	91.6818		71.1618	77.976	79.741	11.263	10.73	10.98	10.921	15.201	13.118	20.164	30.7691	0.989465	69.2265
Austria	AUT	2024	2.93792			73.7342	108.826	63.9707	-0.65909			72.3417	77.931	77.072	10.215	10.607	10.428	10.916	15.221	13.125	20.6064	31.6216	0.50488	69.4658
Austria	AUT	2025										72.586	77.946		10.73	11.223	10.998	10.912	15.243	13.132
Azerbaijan	AZE	2005	9.67951	10.422	42.121	52.543	115.842	25.0852	27.9615		2.97462	48.6053	71.941		16.255	14.434	15.332	11.043	5.04	8.104	6.56167	9.60726	1.02227	52.5029
Azerbaijan	AZE	2006	8.32892	8.53986	37.103	45.6429	105.262	23.5098	34.4662	19.7895	2.55552	48.0995	70.202		14.338	15.055	14.691	10.783	5.961	8.417	6.587	9.5426	1.09859	52.654
Azerbaijan	AZE	2007	16.6998	9.66027	33.4014	43.0617	96.6418	21.756	25.4632	19.3646	2.54928	48.8254	66.844		11.594	15.167	13.45	11.207	6.302	8.798	6.50614	9.32891	1.13386	52.8282
Azerbaijan	AZE	2008	20.8491	8.49511	33.4356	41.9307	89.2429	23.6589	10.5914	19.0479	2.44093	48.2766	65.504		11.963	15.363	13.74	11.908	6.897	9.445	6.32769	8.97667	2.09985	53.0633
Azerbaijan	AZE	2009	1.45705	11.1234	42.7566	53.88	74.744	31.3212	9.3695	19.0577	3.22431	49.2061	65.55		14.634	12.565	13.685	11.652	7.075	9.4	6.09541	8.55709	2.07615	53.1358
Azerbaijan	AZE	2010	5.72687	10.8814	39.3625	50.244	74.986	28.2162	4.78883	19.26	2.78062	48.0533	65.299		14.762	14.434	14.64	12.293	6.906	9.64	5.88788	8.20032	1.18979	53.2848
Azerbaijan	AZE	2011	7.85833	10.1277	37.2586	47.3862	80.508	27.7128	-1.573	19.6473	2.43564	48.0427	65.574		14.614	14.399	14.52	12.622	6.041	9.377	5.74281	7.96574	1.303	53.5085
Azerbaijan	AZE	2012	1.06621	10.526	39.471	49.997	78.2631	29.5223	2.20294	20.4385	2.06763	48.0597	66.002		16.095	11.921	13.974	12.911	4.596	8.803	5.67836	7.88215	1.32876	53.8076
Azerbaijan	AZE	2013	2.41572	10.2832	41.903	52.1862	74.6758	31.4926	5.84342	21.4404	2.44213	48.5244	66.426		15.713	11.264	13.478	11.736	4.091	7.95	5.68448	7.93265	1.29345	54.1821
Azerbaijan	AZE	2014	1.37344	10.8859	45.4376	56.3235	69.4832	34.1869	2.79759	23.1597	2.63304	48.9423	67.484		15.679	11.285	13.415	10.551	3.38	6.985	5.71574	8.02751	1.24821	54.6319
Azerbaijan	AZE	2015	4.02769	12.4082	56.6901	69.0984	72.6015	40.6504	1.04955	25.4832	2.95168	49.5804	68.26		15.631	11.245	13.363	9.23	2.828	6.026	5.79496	8.19052	1.19121	55.157
Azerbaijan	AZE	2016	12.4434	12.8321	58.7085	71.5405	90.0773	39.3227	-3.0636	27.2369	2.90341	49.3351	69.598		14.984	10.97	12.925	7.796	2.341	5.055	5.9464	8.45992	1.11786	55.7575
Azerbaijan	AZE	2017	12.9359	11.3414	57.5864	68.9278	90.4023	38.1232	0.153615	28.4671	2.47382	49.276	70.21		14.323	10.542	12.389	6.813	1.991	4.389	6.14014	8.77854	0.981262	56.4332
Azerbaijan	AZE	2018	2.26855	10.4665	54.1406	64.6071	91.6726	35.2832	1.5004	28.9725	2.45543	49.0193	70.791		13.269	10.064	11.637	6.002	1.787	3.88	6.36888	9.11543	0.866317	57.1842
Azerbaijan	AZE	2019	2.61057	11.1235	57.5067	68.6302	85.8181	36.9725	2.47981	32.9222	3.17646	48.92	70.825		12.743	10.267	11.475	5.345	1.68	3.488	6.62764	9.49172	0.846647	58.1308
Azerbaijan	AZE	2020	2.75981	16.2189	60.8859	77.1048	72.0179	42.3542	-4.19896	36.3855	4.33205	48.9943	73.286		17.626	12.808	15.129	5.637	1.617	3.582	6.88337	9.87193	0.684365	58.2935
Azerbaijan	AZE	2021	6.6503	13.8674	52.3633	66.2308	76.2869	37.7012	5.61644	39.0096	3.70208	48.8282	69.644		16.511	12.956	14.675	5.778	1.85	3.753	7.14668	10.2523	0.441198	58.366
Azerbaijan	AZE	2022	13.8523	11.6421	43.3627	55.0049	86.9823	32.0715	4.71468	41.0018	3.0469	48.79	71.161		15.267	12.113	13.616	4.982	1.623	3.237	7.52651	10.8022	0.0395079	58.4383
Azerbaijan	AZE	2023	8.78543	13.815	53.9849	67.7999	83.5359	39.7647	1.35448	41.3908	3.664	49.4568	71.102		15.25	12.077	13.581	4.937	1.664	3.228	8.01055	11.502	0.120242	58.5075
Azerbaijan	AZE	2024	2.21217	14.3667	55.4356	69.8024	82.6899	42.3163	4.0714	41.3414		49.8776	71.076		15.224	12.038	13.544	4.961	1.678	3.24	8.55577	12.287	0.480155	58.5738
Azerbaijan	AZE	2025										50.238	70.894		14.707	11.652	13.091	4.982	1.691	3.252
Bahamas, The	BHS	2005	1.59161	9.75173	59.4295	69.1812	81.3963	82.1954	3.39608			78.6804	80.515		24.152	17.079	20.264	26.226	10.419	18.314	7.88484	11.9062	1.20292	81.8606
Bahamas, The	BHS	2006	2.38983	10.2388	61.5319	71.7706	87.5507	78.9506	2.51659			79.1907	80.614		18.147	14.96	16.4	23.754	9.413	16.582	8.14438	12.2598	1.2946	82.0396
Bahamas, The	BHS	2007	2.49258	10.0976	60.4153	70.5129	88.0128	82.0797	1.4461			79.7395	80.681		21.492	16.778	18.918	25.219	10.296	17.768	8.38936	12.5712	1.41343	82.1965
Bahamas, The	BHS	2008	4.48956	11.1847	61.255	72.4397	87.4292	81.2018	-2.32365			80.8083	80.737		19.986	14.526	17.015	24.899	9.588	17.262	8.62447	12.857	1.34543	82.3197
Bahamas, The	BHS	2009	2.06273	12.6729	60.5913	73.2642	76.521	82.3926	-4.17543			81.0556	80.821		29.874	22.734	26	29.411	14.212	21.835	8.8844	13.1972	1.30112	82.3978
Bahamas, The	BHS	2010	1.34403	12.5171	61.6823	74.1995	78.6756	81.138	1.53866		2.45166	82.1225	80.924		29.588	23.974	26.552	29.402	14.985	22.224	9.15675	13.5594	1.27842	82.4198
Bahamas, The	BHS	2011	3.19878	13.7591	62.9694	76.7284	88.3337	79.8624	0.613171		2.35577	83.1302	81.041		29.238	25.096	27.004	29.411	15.587	22.533	9.40551	13.8782	1.15016	82.413
Bahamas, The	BHS	2012	1.97337	13.0881	63.5667	76.6548	84.2515	76.9412	4.52004		2.30391	83.4161	81.18		31.46	29.413	30.359	29.997	17.418	23.738	9.637	14.1752	1.00108	82.3947
Bahamas, The	BHS	2013	0.722415	11.7381	64.4669	76.205	84.5484	79.0402	-2.8632		2.42429	83.9316	81.337		36.321	32.864	34.465	32.062	19.239	25.68	9.84964	14.4471	0.923628	82.3636
Bahamas, The	BHS	2014	1.51376	11.1355	64.4926	75.6282	80.537	78.3941	1.84697		2.24715	84.1525	81.513		32.527	25.93	28.993	30.358	15.875	23.149	10.0401	14.6902	0.878822	82.3181
Bahamas, The	BHS	2015	1.86148	11.368	63.6784	75.0465	69.678	76.8374	0.997412		2.27232	84.5566	81.706		28.694	21.372	24.781	28.347	13.318	20.866	10.2099	14.9015	0.794122	82.2569
Bahamas, The	BHS	2016	-0.346377	10.718	64.4194	75.1374	67.2129	76.49	-1.15651		2.58786	84.6759	81.905		31.804	20.626	25.844	29.193	13.005	21.135	10.3649	15.0852	0.700545	82.1784
Bahamas, The	BHS	2017	1.51821	11.7105	66.5266	78.2363	68.3343	74.96	3.3714		2.6951	84.5698	82.135		26.43	17.251	21.547	26.316	10.944	18.665	10.5142	15.2567	0.624247	82.0814
Bahamas, The	BHS	2018	2.26586	11.2722	66.0704	77.3426	72.1543	75.1389	2.39796		2.49264	84.6431	82.382		24.848	23.552	24.16	24.768	13.402	19.112	10.6676	15.4334	0.569969	81.9643
Bahamas, The	BHS	2019	2.49124	12.655	60.3758	73.0316	68.7866	74.3692	-0.838586		2.62573	84.6219	82.589	88.098	19.811	18.724	19.235	22.04	11.135	16.614	10.8244	15.6137	0.497339	81.8257
Bahamas, The	BHS	2020	0.0385211	21.7684	63.1552	84.9236	53.4208	76.4658	-20.0894		3.71252	84.7222	75.713		24.32	23.612	23.943	25.409	15.736	20.592	10.9764	15.7852	0.300555	81.6643
Bahamas, The	BHS	2021	2.90491	17.344	66.6827	84.0268	65.9325	77.177	17.5861		3.04891	84.1843	77.489		21.814	21.726	21.768	23.101	13.841	18.485	11.092	15.8978	0.12875	81.4784
Bahamas, The	BHS	2022	5.60541	13.1735	62.1344	75.308	75.983	80.3099	10.8779		2.62367	84.1954	82.657		18.354	18.995	18.694	20.252	10.892	15.584	11.2521	16.0751	0.293484	81.3201
Bahamas, The	BHS	2023	3.05292	13.1128	63.396	76.5082	76.5495	78.5585	3.04824		2.74192	84.2827	82.844	98.774	17.162	18.171	17.696	19.177	10.091	14.647	11.498	16.3848	0.477304	81.3214
Bahamas, The	BHS	2024	0.409162	12.9112	64.2988	77.21	79.2425	77.186	3.37867			84.357	82.927		17.69	18.828	18.291	18.931	10.202	14.576	11.7759	16.7479	0.460335	81.3249
Bahamas, The	BHS	2025										84.4354	82.899		19.598	18.936	19.248	19.77	10.276	15.028
Bahrain	BHR	2005	2.58621	14.0567	39.7334	53.7902	148.314		6.769	19.0136		67.3783	67.165		9.334	1.786	3.836	30.896	18.427	23.199	2.14426	2.89328	7.60408	91.1682
Bahrain	BHR	2006	2.00747	12.7112	34.7271	47.4385	147.104	53.4635	6.467	17.5359	2.87441	66.235	68.148		9.692	1.836	3.93	30.685	17.332	22.486	2.13167	2.83929	7.74779	92.7186
Bahrain	BHR	2007	3.25667	12.0998	31.6131	43.7129	137.785	52.81	8.29396		2.575	65.231	69.338		10.031	1.899	4.062	29.971	15.516	21.222	2.11532	2.78666	7.8923	94.4605
Bahrain	BHR	2008	3.526	11.293	34.4866	45.7796	145.883	48.3071	6.24501		2.49678	64.1274	70.664		10.487	2.041	4.309	28.961	13.321	19.693	2.10585	2.74808	5.99407	96.3461
Bahrain	BHR	2009	2.79551	13.9782	40.9096	54.8878	117.964	55.5965	2.53989			64.3087	72.034		11.114	2.278	4.688	27.78	11.066	18.122	2.10822	2.727	6.5687	98.3278
Bahrain	BHR	2010	1.96188	12.3894	41.1678	53.5572	115.561	54.7856	4.3343		2.35115	63.193	73.068		11.756	2.429	4.953	26.873	9.335	16.861	2.15047	2.77601	4.16586	100
Bahrain	BHR	2011	-0.400041	13.3096	40.4496	53.7592	167.53	50.6069	1.92816	46.3075	2.31235	63.6565	72.552		13.086	2.648	5.283	26.439	9.171	16.508	2.23518	2.88831	-2.7666	100
Bahrain	BHR	2012	2.7574	14.8558	39.1193	53.975	178.824	52.445	3.80303	47.6812	2.54483	63.9105	72.999		13.292	2.736	5.425	24.639	8.116	15.079	2.30276	2.95897	1.16009	100
Bahrain	BHR	2013	3.30001	14.9619	41.7717	56.7336	184.59	52.1332	5.29262	44.1275	2.38287	63.8452	73.047		13.01	2.724	5.439	22.907	6.746	13.644	2.45569	3.15698	3.59293	100
Bahrain	BHR	2014	2.64755	15.4831	41.6956	57.1787	168.576	53.721	4.30886	44.7867	2.36919	63.7101	72.764		12.623	2.662	5.398	22.494	6.268	13.308	2.6254	3.40761	4.78104	100
Bahrain	BHR	2015	1.84863	16.8845	46.7183	63.6028	147.916	59.7147	2.50787	45.644	2.55344	63.7682	72.953		12.546	2.67	5.427	21.099	5.234	12.105	2.58876	3.36626	4.15422	100
Bahrain	BHR	2016	2.78679	16.278	47.4829	63.761	132.823	60.7105	3.81499	46.7632	2.80248	63.6403	73.551		12.828	2.756	5.527	20.599	5.161	11.795	2.53749	3.27951	3.82316	100
Bahrain	BHR	2017	1.38672	15.8529	42.5232	58.3761	136.429	58.8266	4.95384	48.7281	2.21637	63.6676	74.005		12.948	2.823	5.593	20.179	5.052	11.546	2.61202	3.36559	5.29315	100
Bahrain	BHR	2018	2.08767	15.5592	41.5249	57.0841	144.075	57.2062	2.05259	50.2628	2.38894	63.7994	73.79		12.94	2.839	5.633	19.885	4.888	11.375	2.77239	3.58267	0.131482	100
Bahrain	BHR	2019	1.00582	14.9942	38.6106	53.6048	135.418	56.3995	2.05288	52.9046	2.11147	63.9398	73.295		12.938	2.833	5.657	19.256	4.566	10.943	3.00447	3.90723	-1.29469	100
Bahrain	BHR	2020	-2.31771	16.5555	40.7009	57.2565	135.461	57.8231	-5.91136	54.4078	2.05802	64.5012	71.224		15.917	2.936	6.389	21.449	6.931	13.026	3.27889	4.26792	-0.781611	100
Bahrain	BHR	2021	-0.606319	15.2084	37.9502	53.1585	153.799	52.8741	4.35004	47.5016	1.85116	63.91	71.015		14.472	3.101	6.043	21.221	7.687	13.209	3.46416	4.48469	2.16103	100
Bahrain	BHR	2022	3.62574	13.6922	36.9366	50.6288	167.141	49.2411	6.18016	50.3074	1.71192	63.8685	72.445		12.969	2.626	5.33	19.168	6.364	11.621	3.49895	4.5193	1.34222	100
Bahrain	BHR	2023	0.0746207	14.6137	38.8675	53.4812	157.448	51.945	3.87812	57.0562	1.88778	63.9778	72.973		12.693	2.693	5.381	17.438	4.898	10.173	3.638	4.70204	3.37686	100
Bahrain	BHR	2024	0.919635	14.114	39.9341	54.048	157.818	53.1861	2.6038	58.3677		64.1041	72.975		12.63	2.743	5.469	17.326	4.914	10.207	3.8534	4.97665	0.733547	100
Bahrain	BHR	2025										64.2594	72.928		12.545	2.709	5.416	17.535	5.007	10.34
Bangladesh	BGD	2005	7.04662	5.18023	73.7641	78.9443	34.3969	52.88	6.53594	6.13484		30.4395	59.266		12.819	7.492	8.79	55.507	6.543	30.99	3.72492	6.15324	1.26067	25.477
Bangladesh	BGD	2006	6.76526	5.44008	73.1233	78.5634	38.1119	52.7446	6.6719	7.0704	2.13129	30.877	59.243	72.584	11.921	5.763	7.255	57.497	7.115	32.256	3.80177	6.25483	1.16117	25.9479
Bangladesh	BGD	2007	9.10698	5.35946	73.8932	79.2526	39.9424	52.884	7.0586	7.66305	2.20222	31.3753	59.476		11.893	6.575	8.022	55.218	9.232	32.168	3.88739	6.3719	1.07564	26.4153
Bangladesh	BGD	2008	8.90194	5.17828	75.6323	80.8106	42.6209	52.9321	6.01379	8.62266	2.05457	31.8272	59.712		11.975	7.411	8.795	52.674	11.616	32.086	3.98312	6.50585	0.998441	26.8721
Bangladesh	BGD	2009	5.42347	5.09375	74.5738	79.6676	40.0928	53.3233	5.04512	10.4939	1.93942	32.2859	59.951		12.107	8.271	9.557	49.697	13.921	31.753	4.0903	6.65506	0.931892	27.3111
Bangladesh	BGD	2010	8.12668	5.07533	74.1147	79.19	37.8028	53.4983	5.57179			32.7415	60.194	85.838	7.049	5.845	6.289	45.523	14.697	30.06	4.20925	6.81767	0.876531	27.7254
Bangladesh	BGD	2011	11.3952	5.09745	74.2805	79.3779	47.4208	53.0458	6.46438	13.2663	2.1327	33.1927	59.773	72.781	7.939	7.113	7.429	44.926	14.551	29.686	4.34377	6.99773	0.908526	28.11
Bangladesh	BGD	2012	6.2175	5.03934	73.7369	78.7762	48.1109	53.1516	6.52146	13.4212	2.1755	33.6489	59.349		8.808	8.362	8.538	44.628	14.441	29.479	4.48906	7.18428	0.958356	28.4788
Bangladesh	BGD	2013	7.53041	5.11613	72.8478	77.9639	46.2964	53.3902	6.01361	13.4901	1.96616	34.1119	58.918	80.094	9.694	9.661	9.674	44.546	14.193	29.311	4.62684	7.35009	0.938408	28.8407
Bangladesh	BGD	2014	6.99164	5.33752	72.5725	77.9101	44.5141	53.6358	6.06106	13.5777	2.09872	35.0587	58.541		10.942	9.626	10.122	45.81	13.005	29.345	4.75657	7.49808	0.911168	29.1944
Bangladesh	BGD	2015	6.19428	5.40424	72.4373	77.8415	42.086	53.7138	6.55264	15.574	1.87225	35.9781	58.166		12.391	9.602	10.561	46.841	11.539	29.124	4.9026	7.6705	0.893819	29.5395
Bangladesh	BGD	2016	5.51353	5.8653	66.8644	72.7297	31.3342	51.2078	7.11348	17.3985	1.28184	36.8757	57.794	77.52	14.094	9.562	10.956	47.763	10.134	28.88	5.07224	7.88083	0.892432	29.8754
Bangladesh	BGD	2017	5.70207	6.02233	66.9119	72.9342	29.9997	51.3839	6.59025	18.5176	2.11343	38.9834	60.504	79.638	16.225	10.066	12.101	44.774	9.86	27.386	5.25889	8.13254	0.850917	30.2016
Bangladesh	BGD	2018	5.54362	5.95917	67.5897	73.5488	32.5146	50.8902	7.31941	19.571	2.09477	39.1809	61.156		13.803	10.768	11.907	39.078	9.874	24.753	5.45814	8.42341	0.820955	30.5176
Bangladesh	BGD	2019	5.592	6.23819	66.8774	73.1156	31.5781	50.8493	7.88192	22.7095	1.13095	39.3551	61.768		11.935	11.606	11.742	33.58	9.758	22.067	5.66256	8.73026	0.846411	30.8228
Bangladesh	BGD	2020	5.69107	5.97121	66.9512	72.9224	26.2714	51.5113	3.44802	22.6923	2.13974	38.4822	62.144		12.11	14.585	13.473	28.735	10.764	20.161	5.83514	8.99008	0.836311	31.1169
Bangladesh	BGD	2021	5.54565	5.88275	68.7754	74.6582	27.724	51.3015	6.93868	23.9007	2.17091	38.2385	63.568		9.979	15.268	12.72	23.602	10.705	17.505	5.97381	9.19732	0.814978	31.3992
Bangladesh	BGD	2022	7.69695	5.699	69.0766	74.7756	33.78	51.0381	7.09983	23.5005	2.08539	38.3625	64.576	78.087	7.732	14.277	10.985	19.04	10.422	14.958	6.13516	9.42496	1.02423	31.6737
Bangladesh	BGD	2023	9.8835	5.66517	68.5753	74.2405	30.983	51.1119	5.77511	24.2003	2.16214	37.0078	63.45	77.05	4.671	11.06	7.905	18.705	9.591	14.338	6.32055	9.67649	1.22171	32.1578
Bangladesh	BGD	2024	10.4657	5.90807	70.1347	76.0428	26.7781	51.4167	4.22326	23.7296	2.03438	37.3716	61.347	74.856	4.933	13.196	9.097	19.724	10.88	15.431	6.49846	9.91941	1.21462	32.6783
Bangladesh	BGD	2025										37.7063	61.294		5.333	13.258	9.385	20.1	10.949	15.598
Barbados	BRB	2005	6.08219					71.9348	3.95546		5.66965	76.22	80.293		24.88	18.229	21.259	23.487	27.461	25.465	11.3248	16.7404	0.52537	60.639
Barbados	BRB	2006	7.30766					72.5253	6.07055			75.4099	80.002		22.817	18.689	20.58	22.798	27.754	25.263	11.341	16.696	0.481152	60.1961
Barbados	BRB	2007	4.03423					72.0321	2.07918	60.2387	5.22061	75.3761	79.745		19.777	15.486	17.46	21.771	26.562	24.154	11.3779	16.6953	0.475162	59.8039
Barbados	BRB	2008	8.10811					72.4636	0.633461		4.92074	75.877	79.536		22.298	16.367	19.109	22.476	26.931	24.691	11.4827	16.8385	0.524264	59.4932
Barbados	BRB	2009	3.64386					73.8294	-5.01728	74.2061	5.1104	75.8262	79.338		23.495	23.895	23.709	22.752	29.881	26.292	11.6579	17.1202	0.515328	59.2945
Barbados	BRB	2010	5.82422					76.3904	-2.21771	69.5953	6.05262	76.2962	79.109		24.826	25.847	25.369	24.123	31.009	27.54	11.8179	17.3735	0.407743	59.2366
Barbados	BRB	2011	9.4322					75.9028	-0.31032	66.9464		76.7795	78.848		31.21	22.952	26.83	26.576	30.264	28.408	11.9514	17.5734	0.325002	59.2367
Barbados	BRB	2012	4.53335					75.1755	-3.41391	70.029	4.58823	77.0698	77.801		32.482	25.816	28.827	27.34	31.754	29.536	12.139	17.8549	0.288929	59.2372
Barbados	BRB	2013	1.8141					75.5391	-1.77117	73.1808	4.50307	77.1756	78.379		31.623	27.122	29.111	27.139	32.109	29.615	12.369	18.2014	0.26217	59.2385
Barbados	BRB	2014	1.7695					75.4626	0.752615	71.2683	5.35951	77.4785	76.888		37.456	28.732	33.056	28.639	33.155	30.893	12.6331	18.5999	0.245678	59.241
Barbados	BRB	2015	-1.11279					74.7409	-1.17048	57.2814	5.15998	77.7496	75.727	80.284	29.697	28.165	28.856	26.837	33.039	29.942	12.9216	19.032	0.230381	59.2451
Barbados	BRB	2016	1.28193					75.0264	1.49651	52.0534	4.1972	77.8774	76.296	81.877	27.718	24.715	26.183	25.849	32.11	28.993	13.2031	19.4486	0.217692	59.251
Barbados	BRB	2017	4.66018					73.461	0.708387	51.0107	3.95621	77.5836	76.764	82.259	25.592	26.761	26.206	25.548	32.804	29.198	13.5159	19.9277	0.204727	59.2593
Barbados	BRB	2018	3.67381					74.1217	-1.27602	45.8752	5.40448	78.6663	76.26	80.593	24.053	24.335	24.207	25.005	31.573	28.316	13.8812	20.5103	0.192554	59.2702
Barbados	BRB	2019	4.10029					74.4119	0.227712	48.9355	3.72228	80.2604	76.193	79.908	21.059	29.935	25.785	23.998	33.403	28.748	14.2957	21.1898	0.176538	59.2841
Barbados	BRB	2020						73.5706	-14.3647	52.9716	3.8653	80.6207	74.53		28.861	31.036	30.031	26.418	33.939	30.218	14.771	21.9909	0.174452	59.3015
Barbados	BRB	2021						74.8619	-0.096778	54.672	4.49793	80.2747	74.104	77.577	31.302	25.667	28.25	27.08	32.313	29.726	15.2621	22.8349	0.159264	59.322
Barbados	BRB	2022						75.7026	17.2265	55.0601	4.14001	80.972	77.677	78.576	25.684	17.342	21.026	25.223	28.736	27.002	15.6988	23.5806	0.0605883	59.3539
Barbados	BRB	2023	9.79207					75.4999	2.91436	54.26	3.77545	82.3988	77.788	79.21	17.077	19.382	18.264	22.013	29.855	25.993	16.0934	24.2301	0.00637559	59.4236
Barbados	BRB	2024	-0.440113					75.5343	2.48226	53.5816	3.55593	82.5048	78.168		16.891	19.158	18.049	22.082	29.97	26.089	16.5502	24.9972	0.0463879	59.5397
Barbados	BRB	2025								50.8011		82.583	78.297		17.614	19.308	18.479	22.155	30.09	26.185
Belarus	BLR	2005	10.3389	20.7853	51.9879	72.7732	118.884	39.6283	9.4	65.4601	5.87103	50.8169	73.087		12.965	17.763	15.58	18.824	13.449	16.079	14.7034	21.0754	-0.683006	72.031
Belarus	BLR	2006	6.99713	19.2074	51.4755	70.6829	124.295	40.8329	9.99999	68.3141	6.07696	51.5202	73.456		11.97	16.393	14.378	17.663	12.649	15.1	14.7876	21.1127	-0.612296	72.6114
Belarus	BLR	2007	8.42675	18.5232	51.8111	70.3343	128.154	40.4715	8.60001	71.1051	5.1521	52.249	73.778		11.012	15.074	13.222	16.335	11.96	14.095	14.7506	20.9775	-0.458848	73.0913
Belarus	BLR	2008	14.8379	16.525	51.9572	68.4822	129.599	37.9914	10.2	71.3164		52.7923	74.074		10.037	13.73	12.045	15.313	11.452	13.333	14.523	20.5478	-0.345415	73.5532
Belarus	BLR	2009	12.9457	16.1001	56.2094	72.3095	108.636	42.1691	0.199995	75.3679	4.36894	53.6767	74.396	78.41	9.113	12.461	10.931	13.753	10.495	12.08	14.2317	20.0469	-0.245915	74.191
Belarus	BLR	2010	7.73575	16.0214	55.6451	71.6665	115.918	43.474	7.75002	80.117	5.22004	54.4046	74.713		9.016	12.471	10.89	11.851	9.816	10.805	13.9455	19.5846	-0.218523	74.5501
Belarus	BLR	2011	53.2287	13.4484	48.7055	62.1539	157.974	44.138	5.54997	87.3374	4.68479	55.2482	75.098		8.943	12.515	10.877	9.515	8.791	9.143	13.7428	19.2875	-0.234283	75.0598
Belarus	BLR	2012	59.2197	13.5667	48.0516	61.6183	153.085	43.2927	1.70785	93.473	4.95964	55.9534	75.578		8.842	12.52	10.829	7.642	7.78	7.713	13.7398	19.3543	-0.156618	75.5281
Belarus	BLR	2013	18.3123	13.4298	51.2564	64.6862	119.816	45.4218	0.998719	95.4975	5.00942	56.5939	76.072		8.775	12.578	10.825	6.758	7.143	6.956	13.8439	19.6155	-0.03838	75.9497
Belarus	BLR	2014	18.1196	13.7543	52.8272	66.5815	110.651	45.6522	1.65112	94.3164	4.81833	57.3736	76.58		8.69	12.612	10.799	6.288	6.918	6.612	14.0573	20.0622	0.0561516	76.3405
Belarus	BLR	2015	13.5345	14.9218	52.8773	67.7991	115.915	47.7417	-3.82957	93.7888	4.78751	58.0723	77.063		8.603	12.65	10.774	5.735	6.788	6.276	14.3138	20.5902	0.132853	76.6264
Belarus	BLR	2016	11.8366	15.6531	54.5098	70.1629	125.209	48.523	-2.52645	91.5207	4.94655	58.7157	77.501	82.96	8.5	12.668	10.729	5.531	6.731	6.147	14.5403	21.0754	0.0877211	76.8459
Belarus	BLR	2017	6.03184	15.6528	54.456	70.1088	133.368	47.6337	2.53218	89.4706	4.795	58.5312	77.947	83.763	7.264	11.271	9.348	4.709	6.306	5.529	14.7976	21.606	-0.109782	77.0208
Belarus	BLR	2018	4.8723	15.7395	53.5533	69.2928	139.394	47.8105	3.1492	84.7098	4.83657	58.0564	78.177	83.705	8.369	12.669	10.651	5.937	7.321	6.649	15.0512	22.1081	-0.213824	77.2133
Belarus	BLR	2019	5.59816	16.843	53.9637	70.8067	130.85	48.4267	1.44646	81.2922	4.97949	58.5558	78.36	83.395	7.342	12.881	10.207	5.654	8.07	6.897	15.3719	22.7212	-0.201787	77.4551
Belarus	BLR	2020	5.54814	16.965	52.2356	69.2005	118.934	49.0119	-0.672743	79.9002	4.86264	58.5259	78.521	83.37	10.096	13.772	12.046	5.763	7.76	6.79	15.7338	23.4066	-0.423475	77.789
Belarus	BLR	2021	9.46028	16.8161	50.8714	67.6875	136.014	48.6965	2.43886	78.6027	4.60641	58.6418	78.887	82.848	9.565	11.355	10.493	4.833	6.083	5.476	16.0698	24.036	-0.828233	78.1311
Belarus	BLR	2022	15.2097	17.2289	53.4309	70.6597	120.024	48.2025	-4.6584	77.0977	4.62823	58.9619	79.393	83.026	9.797	10.713	10.283	5.129	5.167	5.149	16.5068	24.8098	-0.804228	78.4733
Belarus	BLR	2023	5.0006	17.8519	53.9328	71.7847	131.585	48.8056	4.12654	72.825	4.95148	58.9077	79.387	83.426	8.986	11.974	10.596	5.879	6.229	6.059	17.062	25.749	-0.540825	78.8146
Belarus	BLR	2024	5.78532	19.0029	56.7998	75.8028	131.918	49.6802	4.00985	70.1108		59.2134	79.61	83.692	8.936	11.919	10.538	5.944	6.291	6.122	17.6666	26.7528	-0.498818	79.1551
Belarus	BLR	2025										59.4634	79.583		7.783	10.398	9.183	6.008	6.352	6.185
Belgium	BEL	2005	2.78143	22.094	50.1883	72.2823	144.529	65.8743	2.32174	62.8203	5.79586	73.275	66.744	79.515	22.059	21	21.482	13.561	12.488	13.017	17.2202	26.2321	0.550056	83.5645
Belgium	BEL	2006	1.79121	21.9388	50.0482	71.987	149.568	66.1489	2.55234	63.3717		73.3527	66.506	78.569	22.565	18.802	20.511	12.358	10.161	11.245	17.1588	26.0746	0.659558	83.8579
Belgium	BEL	2007	1.82306	21.6159	49.6457	71.2616	152.468	66.054	3.67692	62.4618		73.7134	67.091	79.211	20.879	17.103	18.841	12.168	10.187	11.165	17.0788	25.885	0.734331	84.1454
Belgium	BEL	2008	4.48944	22.6661	50.7243	73.3904	161.088	66.9574	0.446905	62.7642	6.33294	73.7747	67.111	78.287	18.718	17.346	17.97	11.099	9.194	10.135	17.0687	25.8449	0.789977	84.427
Belgium	BEL	2009	-0.0531457	24.1041	51.1864	75.9198	135.138	68.2494	-1.90644	64.9798	6.43466	75.0385	66.935	77.682	22.485	21.485	21.94	11.685	10.493	11.081	17.0993	25.9045	0.8046	84.7026
Belgium	BEL	2010	2.1893	23.726	51.4236	76.1117	150.163	67.9168	2.71031	66.8579	6.44077	75.2729	67.689	76.849	22.358	22.418	22.391	10.946	10.786	10.865	17.1173	25.9579	0.913639	84.9719
Belgium	BEL	2011	3.53208	23.8731	51.1646	75.7432	160.766	68.1084	1.93116	67.7034	6.38482	75.4658	66.738	76.003	18.738	18.712	18.724	12.025	11.609	11.814	17.2511	26.2288	1.301	85.235
Belgium	BEL	2012	2.83966	24.1931	51.7081	76.6971	160.383	68.674	0.215804	69.7491	6.56627	77.0719	66.938	75.834	18.863	20.414	19.738	12.18	12.504	12.345	17.4894	26.6897	0.620164	85.4915
Belgium	BEL	2013	1.1131	24.2058	52.2304	77.0419	157.574	68.8013	0.305495	71.7841	6.60136	76.9366	67.536	75.745	22.465	24.685	23.689	12.1	13.242	12.68	17.7204	27.1406	0.47134	85.7415
Belgium	BEL	2014	0.340003	24.1169	51.561	76.5203	158.572	69.2885	1.76554	74.0397	6.55865	77.3888	67.734	75.737	22.331	23.979	23.225	11.491	12.582	12.045	17.9622	27.6173	0.443929	85.9848
Belgium	BEL	2015	0.561429	23.6812	51.4827	75.9908	155.069	69.4272	1.47416	76.4239	6.46964	77.3894	67.596	75.022	20.041	23.784	22.125	11.815	12.536	12.182	18.1637	28.0118	0.579446	86.2213
Belgium	BEL	2016	1.97385	23.3499	51.4853	75.6399	159.058	69.5879	1.1935	77.2435	6.48613	77.4843	67.62	75.054	18.144	21.711	20.108	9.711	10.054	9.886	18.3567	28.3892	0.5063	86.4508
Belgium	BEL	2017	2.12597	23.1178	51.6629	75.6834	166.904	69.418	1.47447	80.7738	6.44915	77.6473	67.987	75.717	18.026	20.198	19.236	9.429	10.263	9.855	18.5849	28.8395	0.385228	86.6732
Belgium	BEL	2018	2.05316	23.1696	51.8411	75.76	168.278	69.6767	1.87797	79.1237	6.38883	78.2148	68.585	74.824	15.263	16.157	15.748	10.021	9.59	9.801	18.8086	29.2765	0.455185	86.8883
Belgium	BEL	2019	1.43682	23.0038	51.2398	74.8549	165.465	69.5353	2.44289	79.3045	6.32381	77.7955	69.018	75.138	12.266	15.943	14.236	8.717	9.76	9.25	19.0298	29.6973	0.540461	87.0962
Belgium	BEL	2020	0.740792	24.3008	49.0506	74.4878	156.95	70.3395	-4.79298	79.4996	6.7547	78.2959	68.558	75.472	15.117	15.5	15.326	9.523	10.443	9.994	19.224	30.049	0.430997	87.2965
Belgium	BEL	2021	2.44025	23.8396	48.9733	73.6842	177.382	70.7487	6.25446	82.6882	6.38112	79.1522	69.675	75.313	16.177	19.908	18.206	5.667	7.599	6.654	19.4521	30.458	0.411602	87.4306
Belgium	BEL	2022	9.59751	23.5866	50.0387	75.0499	191.179	69.4707	3.95624	83.5736	6.27797	78.4678	70.513	75.994	14.45	18.131	16.41	6.315	7.867	7.107	19.7672	31.0302	0.808165	87.4892
Belgium	BEL	2023	4.04901	23.533	49.8526	75.041	165.847	70.2566	1.71412	82.1476		78.7661	70.574	75.902	14.379	17.652	16.119	5.519	7.957	6.765	20.1453	31.6929	0.850264	87.5515
Belgium	BEL	2024	3.14349			75.89	158.932	70.9861	1.07045			79.4677	71.011	75.743	14.898	19.376	17.343	6.315	8.317	7.339	20.5581	32.4026	0.665559	87.6127
Belgium	BEL	2025										79.7686	71.006		15.59	19.602	17.777	6.37	8.374	7.395
Belize	BLZ	2005	-1.10431	14.5522	64.4083	78.9605	92.9971	62.489	2.21919	16.1423		62.5632	62.879		35.374	14.737	22.155	44.153	15.618	29.996	3.96918	6.83119	2.91741	46.7271
Belize	BLZ	2006	-7.11377	13.682	60.5569	74.2389	98.8811	60.4547	4.51145	16.9415		62.8386	63.124		31.006	12.317	19.03	42.893	14.592	28.863	3.97355	6.79167	2.87084	46.4085
Belize	BLZ	2007	2.31808	14.353	59.9333	74.2863	95.9556	60.0996	3.3394	17.9253		63.2139	63.366		27.058	11.71	17.215	41.919	14.293	28.228	3.97535	6.74645	2.81605	46.0812
Belize	BLZ	2008	6.39443	14.7572	61.888	76.6451	105.462	60.3512	-1.62748	18.7854	4.29996	63.3729	63.609		25.949	11.259	16.52	41.669	14.077	27.996	3.97931	6.7039	2.75173	45.7599
Belize	BLZ	2009	-1.10431	16.1555	62.048	78.2035	89.5809	61.6209	-0.44671	22.0563	4.8012	63.8457	63.853		26.307	11.454	16.766	41.416	13.999	27.835	3.99022	6.67144	2.67547	45.459
Belize	BLZ	2010	0.917977	16.3374	62.323	78.6604	94.8582	61.6121	1.41741	21.5657	5.24252	64.3315	64.082		26.554	11.591	16.92	41.755	14.128	28.043	3.98695	6.59307	2.41171	45.1915
Belize	BLZ	2011	1.60206	16.2852	61.5172	77.8024	106.915	60.9176	-0.130071	21.5464	5.51787	64.5843	64.301		26.646	11.649	16.956	41.948	14.329	28.186	3.97344	6.48328	2.17847	44.9418
Belize	BLZ	2012	1.30058	16.0112	61.7678	77.7791	111.167	61.8058	3.94389	24.0272	5.47352	64.9365	64.53	87.71	26.604	11.649	16.914	41.636	14.12	27.885	3.97681	6.41008	2.15087	44.6903
Belize	BLZ	2013	0.509748	16.4577	63.4248	79.8825	108.673	62.1685	4.06647	24.0045	5.12474	65.187	64.769	83.753	26.598	11.672	16.904	41.748	14.168	27.928	3.99544	6.36712	2.13398	44.4381
Belize	BLZ	2014	1.2014	16.2632	62.7949	79.0581	107.113	61.9065	3.89226	24.0155	5.1395	65.4405	65.742	85.712	29.421	12.104	18.272	40.836	14.857	27.785	4.02797	6.35042	2.11318	44.185
Belize	BLZ	2015	-0.861584	17.182	61.3905	78.5725	104.071	62.1639	2.76026	23.4351	5.35711	66.4967	66.106	85.64	26.018	11.297	16.48	41.393	14.155	27.679	4.0761	6.36049	2.10144	43.9312
Belize	BLZ	2016	0.663427	18.1188	60.9746	79.0935	96.4998	61.8504	-0.0187415	24.476	5.72604	65.7324	66.471	84.545	26.457	11.269	16.547	39.801	15.204	27.378	4.13115	6.37867	2.32231	43.6766
Belize	BLZ	2017	1.14765	18.8216	60.5394	79.361	97.7073	62.5536	-1.83324	24.7317	5.95072	66.8864	66.101	82.79	25.911	9.779	15.686	40.029	15.049	27.378	4.19438	6.41494	2.3031	43.4211
Belize	BLZ	2018	0.269983	19.4629	61.9299	81.3927	100.989	63.7964	0.822069	24.5883	6.1278	65.0921	69.547	78.438	33.594	14.578	22.006	36.008	13.713	24.714	4.27416	6.49214	1.8646	43.1648
Belize	BLZ	2019	0.187069	18.8183	61.9791	80.7974	102.442	64.0699	4.25659	25.1387	5.96378	67.4349	71.915	85.427	29.847	13.204	19.934	35.166	14.845	24.884	4.37513	6.60831	1.46285	42.9078
Belize	BLZ	2020	0.121435	17.2816	62.8858	80.1674	81.6431	61.4327	-13.5229	25.9422	5.21302	66.6013	56.814		34.499	15.213	22.367	36.593	16.007	26.186	4.48554	6.73304	1.28324	42.6498
Belize	BLZ	2021	3.23564	16.6282	62.981	79.6092	98.9824	61.0978	17.9899	23.6814	5.96299	66.6443	63.061		33.284	14.907	21.819	36.487	15.833	26.05	4.5985	6.85471	1.15347	42.3911
Belize	BLZ	2022	6.27689	15.8042	64.4543	80.2586	107.84	61.6054	9.25051	23.9768	4.60416	67.1742	61.066		28.685	12.53	18.422	35.314	13.932	24.472	4.70833	6.95667	1.85125	42.1373
Belize	BLZ	2023	4.38984	15.8202	63.6731	79.4933	106.401	62.1308	0.500128	22.3734	4.23143	67.781	60.415		27.689	12.005	17.833	35.272	14.156	24.525	4.84134	7.10225	2.05773	41.9459
Belize	BLZ	2024	3.28956	15.9426	64.2851	80.2277	108.972	62.441	3.50466	24.8099	4.62276	68.1965	59.736		28.568	12.502	18.553	35.465	14.209	24.641	5.02384	7.34502	1.44078	41.7532
Belize	BLZ	2025										68.5182	62.205		29.495	12.983	19.321	35.658	14.264	24.757
Benin	BEN	2005	5.36452	8.99107	81.0515	90.0426	39.0959	38.0188	1.71316	5.4112	2.65668	35.6756	72.498		1.369	1.244	1.308	20.558	8.841	14.675	3.06526	5.85381	3.22061	40.3098
Benin	BEN	2006	3.78218	9.66673	81.1186	90.7854	39.7747	39.2379	3.94374	6.20295	2.5634	35.9437	72.505		1.614	1.287	1.457	20.847	9.189	14.99	3.05824	5.82487	3.12067	40.7878
Benin	BEN	2007	1.29807	9.56849	79.0827	88.6512	49.1138	41.0099	5.98635	7.43086	2.36331	36.5199	72.514		1.845	1.322	1.596	21.105	9.409	15.22	3.05634	5.81361	2.9551	41.2858
Benin	BEN	2008	7.9473	10.2336	79.5199	89.7535	47.7754	43.8028	4.89658	7.34216	2.77728	37.0752	72.522		2.046	1.343	1.715	21.448	9.82	15.589	3.05763	5.80394	3.01959	41.803
Benin	BEN	2009	0.896072	11.2886	78.6924	89.981	44.7026	44.0903	2.31929	9.34625	3.08927	37.3104	72.528		2.335	1.404	1.902	21.723	9.988	15.803	3.06062	5.79076	2.99904	42.3385
Benin	BEN	2010	2.20784	11.2119	78.4668	89.6787	51.4309	44.5474	2.11406	12.6082	3.67997	37.5046	72.534		2.692	1.486	2.138	21.986	9.935	15.9	3.06379	5.77667	2.98424	42.8917
Benin	BEN	2011	2.70424	11.0235	78.0316	89.0552	47.217	46.9792	2.96375	11.8089		37.9134	72.54	66.174	5.745	5.089	5.448	23.543	11.063	17.234	3.06346	5.76121	2.97782	43.4616
Benin	BEN	2012	6.74468	11.1283	76.5387	87.667	50.7367	48.8721	4.81122	12.8605	3.56202	39.3767	72.994		4.633	4.834	4.725	22.446	11.264	16.787	3.05798	5.73869	2.96767	44.0475
Benin	BEN	2013	0.428889	11.0422	74.155	85.1972	59.2002	49.4208	7.19143	14.7752	3.32751	40.9862	73.445	59.547	3.476	4.521	3.956	21.306	11.228	16.202	3.05292	5.71921	2.94885	44.6503
Benin	BEN	2014	-0.548758	10.1802	72.9688	83.149	65.2683	49.5286	6.35768	14.6916	3.16179	41.0568	73.889		3.275	3.996	3.608	20.781	11.366	16.008	3.0463	5.69712	2.95502	45.2881
Benin	BEN	2015	0.218786	11.4114	75.1722	86.5835	56.7563	49.2409	1.77815	12.4852	3.17298	40.4905	74.329		3.224	3.643	3.418	20.368	11.913	16.079	3.03763	5.67097	2.95392	45.9407
Benin	BEN	2016	-0.79331	10.2808	73.2205	83.5013	58.9869	48.2032	3.33967	11.953	2.8991	40.0442	74.764		3.188	3.293	3.237	19.938	12.23	16.026	3.03144	5.64972	2.9246	46.6095
Benin	BEN	2017	0.0432649	10.479	72.626	83.105	61.4766	48.401	5.67156	11.3379	3.53559	40.0637	75.195		3.078	2.871	2.981	19.564	12.554	16.005	3.02785	5.63172	2.88118	47.2943
Benin	BEN	2018	0.919171	10.4105	70.4497	80.8602	61.7952	48.8001	6.69725	11.5739	2.93162	40.3001	75.622		2.85	2.365	2.621	19.098	12.717	15.858	3.02828	5.61766	2.81364	47.9953
Benin	BEN	2019	0.732849	10.3421	68.4484	78.7905	63.6813	48.0268	6.86569	10.3907	2.73205	40.2452	76.046	80.269	2.659	1.905	2.302	18.753	13.062	15.863	3.03327	5.60785	2.73539	48.7126
Benin	BEN	2020	3.02272	11.3994	68.0551	79.4544	44.8332	47.8973	3.84879	10.3808	2.89898	38.7656	75.712		3.159	2.75	2.96	18.449	12.833	15.597	3.03996	5.59776	2.6626	49.4462
Benin	BEN	2021	1.73354	10.076	67.2907	77.3666	48.0549	45.885	7.15545	9.82797	3.09693	38.5234	76.991		2.963	3.526	3.242	17.667	12.553	15.07	3.04703	5.58534	2.5923	50.1962
Benin	BEN	2022	1.35078	10.0576	61.545	71.6026	44.3816	46.8939	6.25295	10.235	3.09726	39.0161	77.288	76.049	2.642	3.606	3.13	16.774	11.785	14.241	3.06253	5.58684	2.54741	50.9627
Benin	BEN	2023	2.7387	9.50406	60.6205	70.1246	44.6631	47.7222	6.35278		3.22974	39.8399	77.323		2.609	3.564	3.09	16.751	11.823	14.25	3.08788	5.6066	2.52275	51.7458
Benin	BEN	2024	1.16093	9.01435	58.8827	67.897	40.6398	48.8795	7.45312			40.6672	77.363		2.608	3.57	3.089	16.844	11.843	14.307	3.11815	5.63561	2.46175	52.5455
Benin	BEN	2025										41.4424	77.462		2.554	3.22	2.887	16.936	11.865	14.364
Bermuda	BMU	2005							1.67421		1.98877										12.2371	17.713	0.24907	100
Bermuda	BMU	2006							5.54387	32.5519											12.5323	18.1594	0.195946	100
Bermuda	BMU	2007							3.34514	29.232											12.7917	18.4778	0.279712	100
Bermuda	BMU	2008							-1.86596	29.9918											12.9827	18.6383	0.459189	100
Bermuda	BMU	2009							-5.6267	38.3708	2.2892										13.155	18.7982	0.417768	100
Bermuda	BMU	2010		13.8163	47.8157	61.6321	74.5951	88.9208	-2.50288	36.5495	2.30669										13.4624	19.2592	0.251395	100
Bermuda	BMU	2011		14.0446	49.4895	63.5341	76.2704	89.7451	-3.74274	37.8277	2.19657										13.9442	20.0682	0.0125532	100
Bermuda	BMU	2012		14.106	48.7607	62.8667	73.7823	90.6871	-5.3053	36.9151	2.38597										14.4691	20.9405	-0.1366	100
Bermuda	BMU	2013		13.6558	48.4948	62.1506	76.2701	90.0703	-0.279709	35.1998	2.2795										15.0291	21.8325	-0.11319	100
Bermuda	BMU	2014		12.8349	48.9972	61.8321	76.5167	90.8154	-3.70107	33.3333	1.53688										15.5819	22.6729	-0.0708087	100
Bermuda	BMU	2015		12.5031	48.6544	61.1576	73.2955	90.4111	0.77553	30.6167	1.50164										16.1069	23.4832	-0.102368	100
Bermuda	BMU	2016		12.1306	48.8186	60.9492	72.7499	90.1323	-0.657206		2.03906										16.6458	24.3752	-0.0236382	100
Bermuda	BMU	2017		11.6269	49.1851	60.812	72.3924	89.7083	3.61142	21.8094	1.32496										17.1662	25.2773	0.203106	100
Bermuda	BMU	2018		11.7283	48.7763	60.5046	77.5553	89.6169	-0.432801	22.3408	1.93595										17.674	26.1594	0.397147	100
Bermuda	BMU	2019		12.2567	48.1757	60.4324	77.5601	89.1452	0.307106		1.9268										18.2328	27.1517	0.43146	100
Bermuda	BMU	2020		12.7248	47.7451	60.4698	69.1937	90.3342	-6.82757		1.74835										18.8228	28.2241	0.428053	100
Bermuda	BMU	2021		12.3184	47.1589	59.4773	71.4082	90.498	4.60743		1.94565										19.4445	29.3633	0.412308	100
Bermuda	BMU	2022		11.9364	47.0421	58.9785	75.1972	90.5815	6.47623		1.77583										20.1418	30.6438	0.156109	100
Bermuda	BMU	2023		11.3688	45.4604	56.8292	73.5909	91.4562	4.91722	17.3357	1.8651										20.9118	32.0692	-0.0787967	100
Bermuda	BMU	2024		11.0325	43.7933	54.8388	75.2902		5.97253												21.7439	33.6325	-0.0958758	100
Bhutan	BTN	2005	5.31263	23.862	39.8543	63.7163	97.7434	42.995	6.93507	4.87233	6.7642	31.7688	71.56		8.426	10.374	9.438	15.958	10.608	13.06	4.69219	7.55788	1.72527	30.938
Bhutan	BTN	2006	5.00045	23.1583	33.5611	56.7194	108.158	42.616	5.64081	5.12222		32.1286	71.688		9.615	9.474	9.543	16.189	10.292	13.014	4.78168	7.60713	1.34079	31.5665
Bhutan	BTN	2007	5.15611	20.8381	38.4599	59.298	106.929	39.5301	16.1048	5.54622		32.6683	71.824		12.162	10.664	11.413	16.836	10.496	13.437	4.85345	7.63574	1.16227	32.1738
Bhutan	BTN	2008	8.32716	20.7105	43.8843	64.5948	101.954	40.7036	4.52945	6.58205	4.56951	32.9383	71.945		13.294	10.556	11.941	16.969	10.352	13.427	4.93297	7.67724	1.12969	32.7637
Bhutan	BTN	2009	4.36112	23.2326	43.208	66.4406	101.559	42.7819	7.66749	6.29682	4.41888	33.2704	72.041		14.363	10.4	12.42	17.134	10.342	13.495	5.02076	7.73713	1.10655	33.3397
Bhutan	BTN	2010	7.03638	21.2189	42.0842	63.3031	105.011	43.0053	11.9319	6.57718	3.82319	33.6171	70.318		10.879	6.996	8.784	18.366	9.951	13.846	5.11486	7.81321	1.09544	33.9052
Bhutan	BTN	2011	8.84899	21.1375	37.5917	58.7292	102.796	44.7529	8.48926	7.70503	4.31659	30.6455	69.308		11.244	6.644	8.911	17.957	10.747	14.069	5.21211	7.90109	1.09781	34.4638
Bhutan	BTN	2012	10.9197	20.2849	32.7352	53.0201	94.045	42.3928	5.16482	7.60806		31.747	66.627		7.024	6.937	6.982	17.43	12.295	14.647	5.3102	7.9984	1.10778	35.0189
Bhutan	BTN	2013	8.77638	18.3623	37.8072	56.1695	95.0525	42.457	1.73634	10.3629	5.16564	32.6975	67.401		9.779	9.02	9.389	18.749	12.444	15.316	5.411	8.10773	1.10832	35.574
Bhutan	BTN	2014	8.27106	18.1268	44.9168	63.0436	87.9343	43.0401	5.88109		5.46183	32.5268	64.51	57.82	9.843	8.264	9.023	18.918	12.446	15.38	5.51675	8.226	1.07872	36.1327
Bhutan	BTN	2015	4.54814	19.1339	51.002	70.1359	89.6392	43.7448	6.6608		6.92889	32.3532	65.613	63.04	12.47	8.015	10.115	18.544	11.374	14.618	5.63327	8.35647	1.01497	36.6983
Bhutan	BTN	2016	3.21989	18.1053	47.6344	65.7397	76.3848	43.4016	8.47594		6.40448	32.6472	65.401		13.401	10.096	11.614	18.655	11.458	14.72	5.76253	8.50253	0.973884	37.2745
Bhutan	BTN	2017	4.95508	18.1851	47.5427	65.7278	76.7884	43.2393	2.08685	14.8355	6.61724	32.8177	65.156		14.497	12.424	13.355	18.831	11.593	14.899	5.83667	8.54014	0.861275	37.8646
Bhutan	BTN	2018	2.72396	18.4949	48.8498	67.3448	79.7397	45.6144	3.50187	14.9304	6.4781	32.9435	64.883	86.314	15.578	14.902	15.199	19.114	11.819	15.188	5.86666	8.48639	0.716471	38.4662
Bhutan	BTN	2019	2.72643	19.1177	48.0054	67.1232	76.1235	49.6274	5.75515	15.942	4.50983	33.4271	68.604	88.348	13.422	9.807	11.56	13.198	7.958	10.405	5.92797	8.4797	0.664446	39.0747
Bhutan	BTN	2020	5.62937	22.3154	54.3132	76.6285	71.8304	49.9816	-10.2184	16.8651	5.46992	35.2256	70.089	87.012	24.794	19.209	21.989	15.948	8.416	11.968	6.01801	8.52306	0.675257	39.6889
Bhutan	BTN	2021	7.34681	22.6722	52.1241	74.7964	77.5824	50.1792	4.42137	14.7382	6.59839	34.5324	71.233	91.116	23.992	17.214	20.609	12.348	7.039	9.563	6.12664	8.60454	0.703488	40.3075
Bhutan	BTN	2022	5.63917	21.0173	57.7774	78.7947	85.5712	51.1968	5.21387	14.5781	7.46982	40.8044	65.719	85.225	31.127	23.757	27.177	20.059	14.328	17.069	6.24575	8.7091	0.703184	40.9365
Bhutan	BTN	2023	4.22934	20.3354	59.3593	79.6947	81.7366	52.7908	4.63216	15.0075	5.84519	40.9315	67.738	68.964	17.796	12.271	14.939	22.739	16.937	19.723	6.3687	8.82469	0.698147	41.7352
Bhutan	BTN	2024	2.76132							13.0113		41.2758	67.745	71.591	19.106	16.832	17.934	23.206	17.496	20.241	6.49424	8.9456	0.651371	42.5645
Bhutan	BTN	2025										41.7511	67.69		18.409	15.782	17.052	23.142	17.379	20.146
Bolivia	BOL	2005	5.39323	15.9746	66.3175	82.292	67.6419	46.8202	4.42143			40.8156	70.753	87.075	6.665	4.163	5.22	18.81	5.598	12.08	5.374	9.22075	1.68565	64.2133
Bolivia	BOL	2006	4.2824	14.3542	62.7749	77.1291	74.5378	43.1318	4.79701		6.43422	41.8213	70.589	85.96	6.911	4.208	5.349	17.926	3.902	10.786	5.37477	9.16032	1.70464	64.6631
Bolivia	BOL	2007	8.70561	14.0587	63.2253	77.2839	76.0619	42.5096	4.56438		6.72049	42.9748	70.426	87.071	7.243	4.308	5.546	18.054	4.226	11.019	5.38086	9.11141	1.71052	65.1067
Bolivia	BOL	2008	14.0068	13.2774	62.2238	75.5012	82.867	40.496	6.1485		6.72302	47.3316	70.266	82.311	7.503	4.362	5.686	15.41	4.147	9.685	5.39547	9.0799	1.68811	65.5448
Bolivia	BOL	2009	3.34645	14.7088	65.5018	80.2106	68.6271	43.5085	3.357		7.57486	47.7719	70.11	88.179	6.616	4.312	5.283	15.177	3.367	9.179	5.41919	9.06623	1.66527	65.9782
Bolivia	BOL	2010	2.50328	13.8312	62.2985	76.1297	75.5116	43.5524	4.12672		6.97379	48.4243	69.956		6.559	4.354	5.283	16.467	3.78	10.029	5.4522	9.07017	1.64441	66.4076
Bolivia	BOL	2011	9.88446	13.7771	60.7043	74.4814	82.4804	41.0132	5.20409		6.45056	48.6541	69.805	81.712	6.545	4.441	5.327	17.719	4.18	10.854	5.49155	9.08539	1.62277	66.8337
Bolivia	BOL	2012	4.5156	13.4396	59.5037	72.9434	84.9488	40.4435	5.12228		6.628	50.8256	69.655	85.552	4.564	2.486	3.361	17.499	3.517	10.414	5.53104	9.10174	1.59965	67.2581
Bolivia	BOL	2013	5.7364	13.8415	60.1867	74.0282	81.2309	40.2118	6.79601		6.80322	50.0396	69.503	81.771	5.56	5.269	5.392	16.835	4.228	10.45	5.55754	9.09587	1.57374	67.6697
Bolivia	BOL	2014	5.7666	14.707	62.9374	77.6445	85.2645	41.4654	5.46057		7.47813	47.53	69.346	81.953	7.057	3.118	4.774	18.666	3.837	11.158	5.56754	9.0599	1.54456	68.0374
Bolivia	BOL	2015	4.05961	17.4953	68.4197	85.915	67.9328	45.9764	4.85719		8.14343	48.7216	69.19	80.126	8.335	5.778	6.852	22.448	6.866	14.561	5.57957	9.02842	1.51686	68.3958
Bolivia	BOL	2016	3.62321	17.4583	68.9094	86.3677	56.401	49.8023	4.26392		8.15061	49.1262	69.038	78.097	7.729	6.081	6.772	16.905	4.826	10.791	5.60109	9.01632	1.48971	68.7446
Bolivia	BOL	2017	2.82276	15.1955	66.9265	82.122	45.5761	51.5106	4.19521		8.09724	49.201	70.18	77.886	7.59	5.966	6.654	18.255	5.062	11.577	5.62694	9.01387	1.46125	69.0838
Bolivia	BOL	2018	2.27206	16.0783	66.1083	82.1866	46.9262	52.3312	2.86808		8.01587	49.0913	73.409	79.498	6.901	6.684	6.78	17.693	4.142	10.834	5.65832	9.02162	1.43337	69.4134
Bolivia	BOL	2019	1.83955	16.1153	66.9084	83.0237	45.821	53.3452	1.50672		8.09104	51.4066	76.018	82.05	7.562	6.435	6.927	16.879	6.462	11.606	5.69638	9.04093	1.40658	69.7335
Bolivia	BOL	2020	0.940742	18.6067	67.8979	86.5046	37.5164	55.7779	-12.7195		8.43711	51.9315	74.047	78.413	15.928	14.686	15.241	18.013	9.497	13.702	5.6536	8.92774	1.23396	70.0443
Bolivia	BOL	2021	0.737384	16.9869	65.7886	82.7754	47.6671	52.5597	10.029		7.96215	51.921	79.614	83.891	8.669	7.797	8.199	15.072	6.982	10.976	5.52076	8.66825	1.01931	70.345
Bolivia	BOL	2022	1.74633	16.3831	67.513	83.8961	57.5249	52.8584	3.74742		7.5755	54.6787	80.165	85.209	6.7	5.487	6.044	14.357	5.692	9.969	5.47908	8.55807	1.16426	70.6353
Bolivia	BOL	2023	2.57689	16.8531	68.9661	85.8192	49.6083	53.7978	2.51637		8.31589	54.8076	80.13	85.982	5.39	4.607	4.968	13.627	5.67	9.597	5.55047	8.63118	1.37334	70.9151
Bolivia	BOL	2024	5.09977	16.5337	69.627	86.1607	46.9779	53.3625	-1.12336			55.1239	80.133	86.863	5.593	4.81	5.17	11.171	4.953	8.021	5.64147	8.73672	1.37207	71.2361
Bolivia	BOL	2025										55.4921	80.465		5.64	4.476	5.013	10.906	4.669	7.746
Bosnia and Herzegovina	BIH	2005		21.6563	95.2303	116.887	84.3555	54.6379	3.89718	24.1594		47.0906	59.781		66.561	58.723	61.65	36.556	34.727	35.629	13.4871	19.3641	-1.08029	44.1571
Bosnia and Herzegovina	BIH	2006	6.12557	20.9748	90.211	111.186	79.8299	52.5945	5.414	27.0378		47.4562	59.846	72.946	68.844	61.118	63.982	36.264	34.739	35.488	13.8857	19.9272	-0.814268	44.4753
Bosnia and Herzegovina	BIH	2007	1.50078	21.0805	87.2194	108.3	83.5519	52.54	5.85912	30.7171		46.4686	59.951	79.668	66.13	56.578	60.099	32.48	32.238	32.357	14.2342	20.4204	-1.23438	44.7926
Bosnia and Herzegovina	BIH	2008	7.42704	22.0814	86.0451	108.126	86.1629	53.6513	5.44185	34.4739		45.8535	60.124	80.465	54.283	45.692	48.838	28.689	26.123	27.375	14.5483	20.8919	-1.65511	45.1091
Bosnia and Herzegovina	BIH	2009	-0.381464	23.4615	86.3604	109.822	73.7475	55.6401	-3.00446	36.9576		46.1637	60.261	81.256	54.782	47.486	50.142	26.405	26.838	26.628	14.8252	21.3325	-1.73116	45.4246
Bosnia and Herzegovina	BIH	2010	1.99621	23.1271	85.9297	109.057	80.9682	55.5087	0.865667	38.5335		48.2834	60.283	79.745	64.5	56.92	59.665	28.603	28.846	28.728	15.1145	21.807	-1.77666	45.7392
Bosnia and Herzegovina	BIH	2011	3.67125	23.09	85.9904	109.08	87.8363	55.8147	0.959512	41.977		50.316	60.236	83.707	62.446	57.952	59.568	26.698	29.798	28.304	15.4537	22.3531	-1.84492	46.0529
Bosnia and Herzegovina	BIH	2012	2.05267	23.3654	87.5433	110.909	88.1451	56.7862	-0.821837	44.7015		47.9531	60.224	79.758	66.066	64.436	65.019	26.558	31.106	28.923	15.8713	23.0004	-1.93438	46.3656
Bosnia and Herzegovina	BIH	2013	-0.0930457	22.8258	86.6126	109.438	87.9312	56.1571	2.34986	51.3601		50.1741	60.15	81.242	60.604	61.094	60.919	24.878	28.246	26.634	16.323	23.6905	-1.62768	46.6954
Bosnia and Herzegovina	BIH	2014	-0.897194	22.861	86.1722	109.033	90.5523	56.7835	1.15385	54.1656	3.31474	51.8283	60.087	81.385	68.103	62.669	64.598	24.936	29.074	27.097	16.7738	24.4015	-1.28296	47.1308
Bosnia and Herzegovina	BIH	2015	-1.03602	21.9698	82.1467	104.117	88.292	54.9288	4.28413	55.5337	3.01811	51.5119	60.194	78.958	70.597	62.293	65.239	26.567	29.975	28.348	17.2535	25.1996	-1.30697	47.5712
Bosnia and Herzegovina	BIH	2016	-1.5841	20.9094	79.3033	100.213	88.244	54.175	3.24226	56.9546	4.26451	49.6691	60.276	78.922	60.243	54.071	56.261	25.408	28.626	27.09	17.7718	26.0918	-1.30268	48.0249
Bosnia and Herzegovina	BIH	2017	0.810133	20.1653	77.3643	97.5296	96.6459	54.4501	3.2441	54.5287	2.83868	50.4846	60.411	77.476	52.917	45.173	47.925	25.102	25.876	25.506	18.3389	27.089	-1.28437	48.4918
Bosnia and Herzegovina	BIH	2018	1.41711	19.6574	74.8987	94.5561	98.4321	53.7328	3.829	49.7988	3.89297	51.079	60.525	76.564	47.293	36.802	40.535	22.16	23.012	22.605	18.976	28.236	-1.22314	48.9719
Bosnia and Herzegovina	BIH	2019	0.562782	19.359	73.4953	92.8543	94.5161	54.5708	2.88585	46.6678	4.0445	49.2186	60.59	74.597	39.825	32.741	35.263	22.711	22.494	22.598	19.6457	29.467	-1.23186	49.465
Bosnia and Herzegovina	BIH	2020	-1.0513	20.7503	73.4623	94.2126	82.5216	54.6562	-3.01509	43.8039	3.01954	53.666	59.394	79.669	45.797	33.585	37.924	23.299	20.436	21.805	20.2427	30.5809	-1.39008	49.9711
Bosnia and Herzegovina	BIH	2021	1.98164	19.4015	69.8254	89.2269	96.7391	53.8615	7.39164	45.0589	4.13623	50.8578	59.961	80.05	41.831	32.441	35.816	19.873	18.779	19.302	20.6777	31.4058	-1.66385	50.4899
Bosnia and Herzegovina	BIH	2022	14.0208	18.6619	69.0565	87.7185	110.205	54.5017	4.22681	45.6063	2.97013	51.3051	61.76	80.302	38.342	28.006	31.728	18.086	17.198	17.623	21.1033	32.2088	-1.24364	51.0215
Bosnia and Herzegovina	BIH	2023	6.1059	19.1262	69.7123	88.8385	99.633	55.9111	1.99439	45.5028	3.24565	51.7978	62.677	81.292	30.454	25.635	27.27	14.985	16.896	15.98	21.6424	33.2257	-0.61751	51.5657
Bosnia and Herzegovina	BIH	2024	1.69213	19.661	69.1891	88.8501	95.1563	56.5589	2.97152			52.2463	62.92	82.572	30.502	25.701	27.334	15.125	17.026	16.114	22.2302	34.342	-0.65582	52.1224
Bosnia and Herzegovina	BIH	2025										52.6908	63.059		31.41	26.543	28.201	15.264	17.155	16.247
Botswana	BWA	2005	8.61023	19.4007	38.1067	57.5075	88.5054	45.2838	4.55665	9.23078	10.6786	64.4169	61.102		42.263	32.282	36.817	49.852	38.235	44.122	3.41925	5.59573	1.79499	58.4536
Botswana	BWA	2006	11.5552	27.72	33.3185	61.0385	86.6124	47.8448	8.36387	10.0698		64.1066	61.362	52.142	37.275	27.52	31.91	48.278	36.261	42.338	3.4188	5.56033	1.86518	59.6421
Botswana	BWA	2007	7.081	27.9077	34.6372	62.5449	98.4965	48.3122	5.79256	10.2233	9.04667	64.7665	62.403		37.556	26.708	31.605	46.595	33.953	40.332	3.41469	5.52411	1.93813	60.7822
Botswana	BWA	2008	12.7022	30.4959	38.5282	69.0241	99.0082	51.7687	3.25207	14.2659		65.1994	63.412		38.073	26.044	31.491	44.494	31.379	37.984	3.40872	5.48855	2.00821	61.8322
Botswana	BWA	2009	8.0273	35.9378	44.1809	80.1187	88.4808	58.2732	-14.1442	21.9871	9.8253	65.3218	64.388	87.571	39.767	26.152	32.34	42.386	28.878	35.668	3.40267	5.457	2.06588	62.7502
Botswana	BWA	2010	6.94888	30.7753	42.7741	73.5493	94.639	54.7365	10.1197	19.5399		65.7872	61.446	72.44	42.305	29.139	35.093	42.438	29.577	36.032	3.39859	5.43546	2.10944	63.4946
Botswana	BWA	2011	8.45987	28.3311	40.5214	68.8526	98.9615	51.7079	6.83841	17.5135	10.8266	66.1008	62.192		41.677	29.876	35.196	41.633	29.566	35.615	3.39813	5.43043	1.96877	64.0188
Botswana	BWA	2012	7.5369	31.8384	45.9934	77.8317	111.875	55.5813	-0.170857	21.6664	8.10987	66.213	62.832		40.285	30.061	34.652	40.047	28.989	34.521	3.4083	5.4597	1.67774	64.3993
Botswana	BWA	2013	5.88461	31.0633	46.5685	77.6318	125.783	55.1238	11.1029	26.3371	8.01721	66.8901	63.291		39.442	30.688	34.602	38.621	28.522	33.562	3.43325	5.51858	1.50922	64.758
Botswana	BWA	2014	4.40225	29.2538	42.31	71.5638	119.498	53.0342	5.69714	24.8356	7.88874	67.3092	63.667		38.628	31.363	34.6	38.049	28.685	33.35	3.48531	5.61213	1.45442	65.0965
Botswana	BWA	2015	3.06203	31.6394	45.9978	77.6372	112.901	56.8759	-4.85133	26.8693	8.39458	67.2309	63.994		37.949	32.18	34.743	37.143	28.778	32.941	3.56111	5.73553	1.42753	65.4104
Botswana	BWA	2016	2.81496	28.4757	40.6986	69.1743	100.465	54.1249	7.20442	22.6606	8.73589	67.6789	64.315		37.211	32.973	34.851	36.944	29.225	33.064	3.63969	5.85396	1.4197	65.6949
Botswana	BWA	2017	3.30828	28.8781	42.042	70.9201	81.924	56.9681	4.11438	21.4763	7.80924	68.0165	64.668		36.361	33.691	34.872	36.422	29.35	32.866	3.71468	5.95803	1.42048	65.9456
Botswana	BWA	2018	3.23802	29.0985	43.4672	72.5657	87.4551	58.4363	4.18869		7.90539	68.3032	65.055		35.012	33.922	34.404	35.501	29.096	32.282	3.78396	6.04595	1.41898	66.1579
Botswana	BWA	2019	2.77286	31.6419	44.2529	75.8949	83.093	61.2229	3.03177	21.4965	8.399	68.6023	65.469	77.116	34.301	34.816	34.588	34.802	29.196	31.985	3.84555	6.11521	1.42263	66.3272
Botswana	BWA	2020	1.89036	36.1431	48.5436	84.6867	77.6634	65.9173	-8.72888	22.4018	8.05834	65.517	63.344	78.968	42.916	38.371	40.436	39.256	35.052	37.144	3.89045	6.15234	1.43941	66.4488
Botswana	BWA	2021	7.24098	31.5305	43.305	74.8356	88.7587	60.2496	11.9163	21.2033		66.455	66.179	80.202	49.149	38.194	43.355	40.256	30.129	35.168	3.86903	6.08863	1.4913	66.5183
Botswana	BWA	2022	11.6656	27.8884	40.58	68.4685	85.6117	56.4283	5.48602	20.7096		66.6614	66.94	78.93	49.44	36.765	42.611	40.356	33.676	37.003	3.88015	6.09164	1.58848	66.589
Botswana	BWA	2023	5.06762	29.2901	42.8942	72.1842	68.8034	59.1937	3.20807	20.5658		66.2107	70.631	79.999	49.986	39.592	44.361	40.424	34.752	37.581	3.96967	6.22699	1.64032	67.0213
Botswana	BWA	2024	2.81835	32.1214	45.2927	77.4141	71.1053	63.4945	-2.98987	21.4088		66.1443	70.94	78.796	51.103	40.455	45.296	38.207	37.79	37.998	4.03589	6.3224	1.63538	67.4624
Botswana	BWA	2025										66.1988	71.205		51.713	41.272	46.004	38.399	37.87	38.134
Brazil	BRA	2005	6.86954	18.89	60.5043	79.3943	27.0868	56.0759	3.20213		4.47908	62.0771	72.298	84.536	27.385	16.946	21.399	26.448	11.835	19.074	5.77511	8.60566	1.09591	82.9839
Brazil	BRA	2006	4.18357	19.0389	60.4377	79.4766	26.0417	57.1381	3.96199		4.8706	63.0885	71.954	84.296	25.552	15.686	19.883	26.537	12.09	19.244	5.93003	8.79237	1.05834	83.2672
Brazil	BRA	2007	3.64127	18.943	59.8749	78.8179	25.2926	57.7262	6.06987		4.97426	63.4103	71.731	84.361	24.348	14.629	18.795	26.36	12.141	19.179	6.0966	8.99753	1.01237	83.5383
Brazil	BRA	2008	5.67859	18.8394	59.7308	78.5702	27.2576	56.8049	5.0942		5.26884	63.4621	71.699	83.957	22.817	13.633	17.556	24.932	11.849	18.323	6.27423	9.2187	0.957985	83.8036
Brazil	BRA	2009	4.88803	19.6506	61.9565	81.6071	22.106	59.1451	-0.125812		5.46355	64.4203	72.128	84.326	25.603	15.409	19.774	25.346	12.381	18.794	6.46426	9.4576	0.895632	84.0698
Brazil	BRA	2010	5.03873	19.0169	60.2228	79.2397	22.7722	57.6129	7.52823		5.6488	65.3018	71.02		23.572	14.263	18.239	25.57	12.643	19.034	6.66689	9.7149	0.840883	84.3438
Brazil	BRA	2011	6.63645	18.6693	60.2739	78.9431	23.9344	57.5682	3.97442		5.73741	66.1773	69.892	82.963	21.8	13.31	16.928	25.912	13.03	19.397	6.882	9.98998	0.813814	84.6226
Brazil	BRA	2012	5.4035	18.5301	61.4119	79.942	25.1143	58.7336	1.92118	43.2309	5.8551	66.3315	69.52	81.678	19.85	12.96	15.854	27.239	13.991	20.536	7.11477	10.291	0.811598	84.8974
Brazil	BRA	2013	6.20431	18.8925	61.7153	80.6077	25.786	59.6788	3.00482	44.3394	5.83885	66.3184	69.608	81.478	19.409	13.023	15.7	27.446	14.517	20.902	7.37028	10.6261	0.810512	85.1677
Brazil	BRA	2014	6.32904	19.1535	62.9596	82.1131	24.6854	61.251	0.503956	47.1569	5.94848	67.1199	69.534	82.883	18.897	13.023	15.496	27.194	14.34	20.686	7.65358	11.0072	0.806314	85.4331
Brazil	BRA	2015	9.0299	19.7768	63.9648	83.7416	26.9536	62.3079	-3.54576	48.434	6.24106	67.8478	69.982	83.271	23.675	16.433	19.493	28.613	15.758	22.103	7.95681	11.4255	0.791722	85.6936
Brazil	BRA	2016	8.73914	20.3793	64.2515	84.6308	24.5337	63.2037	-3.27592	48.3333	6.31404	68.8325	70.248	83.492	30.996	23.276	26.596	29.615	18.141	23.803	8.26857	11.8604	0.761973	85.9487
Brazil	BRA	2017	3.44637	20.1619	64.4943	84.6562	24.3197	63.3387	1.32287	50.0267	6.32048	69.8641	70.669	83.461	33.119	25.111	28.593	30.507	19.372	24.866	8.59165	12.318	0.728247	86.1983
Brazil	BRA	2018	3.66485	19.8951	64.6161	84.5112	28.8762	62.6534	1.78367	51.1917	6.08851	70.413	70.814	83.228	32.231	24.677	27.958	30.05	19.304	24.605	8.92785	12.8054	0.68344	86.4421
Brazil	BRA	2019	3.73298	19.9836	65.144	85.1276	28.8903	63.0678	1.22078	52.6241	5.96347	70.7201	71.417	83.399	31.877	23.364	27.098	29.475	18.646	23.986	9.27307	13.3105	0.651994	86.6798
Brazil	BRA	2020	3.21177	20.1352	63.144	83.2792	32.3021	61.4484	-3.27676	54.5728	5.7715	70.4295	67.016	80.02	35.308	26.516	30.267	31.25	20.878	25.991	9.59866	13.7823	0.579351	86.9112
Brazil	BRA	2021	8.30166	18.5476	61.368	79.9156	37.6563	56.9134	4.7626	56.8306	5.49698	69.7709	69.505	80.86	33.539	24.254	28.311	28.27	18.625	23.377	9.9111	14.2364	0.425361	87.1361
Brazil	BRA	2022	9.28011	18.4022	63.0641	81.4663	38.8161	58.0872	3.01669	60.3906	5.61923	70.7769	70.743	82.262	24.664	17.676	20.732	25.837	16.258	20.975	10.2518	14.7411	0.360181	87.3496
Brazil	BRA	2023	4.59356	19.0426	62.9243	81.9669	33.6662	59.1789	3.24166			71.6256	70.266	82.136	20.909	15.636	17.938	25.465	15.925	20.621	10.6336	15.3155	0.395929	87.616
Brazil	BRA	2024	4.36746	18.7696	63.9563	82.7259	35.5845	59.1708	3.41932			71.9821	70.97	82.268	18.561	13.447	15.674	24.281	14.498	19.312	11.0492	15.9473	0.405467	87.8959
Brazil	BRA	2025										72.1591	71.049		16.588	11.968	13.981	24.342	14.538	19.361
British Virgin Islands	VGB	2005									3.04633										4.90387	6.79236	3.36903	43.7412
British Virgin Islands	VGB	2006									3.5148										5.04022	6.96153	3.43902	44.2181
British Virgin Islands	VGB	2007									3.04367										5.19406	7.17669	3.50223	44.7167
British Virgin Islands	VGB	2008																			5.37317	7.43471	3.57029	45.2371
British Virgin Islands	VGB	2009								70.4889	3.24165										5.60669	7.78214	3.4766	45.7791
British Virgin Islands	VGB	2010									3.48701										5.89149	8.17575	1.6651	46.3428
British Virgin Islands	VGB	2011																			6.14246	8.48607	3.6716	46.9282
British Virgin Islands	VGB	2012									3.55561										6.33712	8.69467	5.53863	47.5352
British Virgin Islands	VGB	2013									4.45811										6.53556	8.92027	4.37796	48.164
British Virgin Islands	VGB	2014									4.0092										6.72593	9.14868	3.89441	48.8144
British Virgin Islands	VGB	2015								40.3415	4.7045										6.87006	9.31494	4.5546	49.4864
British Virgin Islands	VGB	2016								39.1733	3.25468										7.1787	9.73696	-1.81355	50.1801
British Virgin Islands	VGB	2017									2.45709										7.61644	10.3357	-3.54213	50.8954
British Virgin Islands	VGB	2018								17.7551	2.42556										7.83536	10.5751	5.81552	51.6323
British Virgin Islands	VGB	2019								24.2532	2.50097										8.05067	10.8158	4.89317	52.3908
British Virgin Islands	VGB	2020								30.4758	2.70539										8.32514	11.1496	2.01285	53.1709
British Virgin Islands	VGB	2021								30.3667	3.02455										8.57589	11.4425	1.79872	53.9726
British Virgin Islands	VGB	2022								29.041	2.48402										8.85722	11.77	1.33987	54.7959
British Virgin Islands	VGB	2023								26.6493	3.17284										9.20226	12.1644	1.72311	55.6408
British Virgin Islands	VGB	2024								29.5605											9.62352	12.6803	1.23893	56.5072
Brunei Darussalam	BRN	2005	1.24444	18.2176	14.2801	32.4977	81.6201	27.7621	-0.00392532	15.2499		79.0838	70.459		21.632	17.793	19.414	19.675	15.008	17.192	3.08889	4.3973	1.68725	73.5529
Brunei Darussalam	BRN	2006	0.159888	17.9424	12.6424	30.5848	81.571	26.2087	4.09841	15.2069		79.0835	70.287		22.075	18.354	19.929	19.771	15.091	17.287	3.18445	4.49338	1.58853	74.0148
Brunei Darussalam	BRN	2007	0.967774	22.5869	12.935	35.5219	81.0114	27.7683	-3.76362	15.4847		79.6101	70.016		22.542	18.855	20.414	20.011	15.26	17.489	3.27471	4.6002	1.6886	74.4345
Brunei Darussalam	BRN	2008	2.08498	16.9641	11.2462	28.2102	89.7454	24.7655	-3.90071	15.7385		79.7217	69.707		22.962	19.242	20.811	20.236	15.579	17.76	3.34813	4.70284	1.84867	74.7929
Brunei Darussalam	BRN	2009	1.03572	22.9752	15.4402	38.4154	90.2871	33.6143	-1.90025	16.5658		80.1785	69.502		23.503	19.773	21.345	20.453	15.665	17.905	3.40081	4.77643	1.87722	75.0713
Brunei Darussalam	BRN	2010	0.356869	22.1519	14.7128	36.8648	95.3715	32.503	2.74136	15.3332	1.84384	80.2978	69.415		23.812	20.114	21.674	20.707	15.858	18.129	3.43485	4.82283	1.89898	75.2507
Brunei Darussalam	BRN	2011	0.137912	18.7288	12.7734	31.5022	99.5379	27.3573	3.74441	17.4271	3.32214	80.1145	69.395		24.158	20.519	22.054	20.519	15.71	17.963	3.4837	4.88438	1.78275	75.3121
Brunei Darussalam	BRN	2012	0.111766	18.4381	13.7614	32.1994	105.641	28.2804	0.913135	22.0733	2.88964	80.1688	69.346		24.678	21.095	22.601	19.881	15.481	17.536	3.59148	5.02087	1.53256	75.2714
Brunei Darussalam	BRN	2013	0.389205	20.1644	15.2626	35.427	110.94	31.2459	-2.12478	23.4649		80.4935	69.258		25.394	21.863	23.338	19.745	15.634	17.544	3.75144	5.2266	1.38231	75.1757
Brunei Darussalam	BRN	2014	-0.207109	21.4176	15.5089	36.9265	102.421	32.836	-2.50789	30.0799	3.35322	80.7192	69.15	85.58	26.112	22.654	24.092	19.123	15.38	17.111	3.94037	5.47079	1.34019	75.0573
Brunei Darussalam	BRN	2015	-0.488347	25.0617	19.7856	44.8473	89.8962	39.4304	-0.392384	28.6641		81.3408	69.033		27.378	24.832	25.886	19.699	17.043	18.267	4.1568	5.75224	1.3021	74.9485
Brunei Darussalam	BRN	2016	-0.278693	26.2232	21.1504	47.3736	87.3198	42.976	-2.47792	28.6644	4.4254	82.0372	68.941		28.547	26.983	27.629	20.048	18.623	19.278	4.40308	6.07653	1.25964	74.8816
Brunei Darussalam	BRN	2017	-1.26051	26.4772	20.4756	46.9528	85.1769	40.8511	1.32873	31.2434		82.514	68.905	81.912	29.555	29.044	29.255	19.944	19.985	19.966	4.67856	6.44413	1.2107	74.8476
Brunei Darussalam	BRN	2018	1.02505	24.1417	19.5325	43.6743	93.8981	37.3376	0.052371	27.9286		79.5354	70.041	84.121	32.662	29.572	30.809	23.211	18.588	20.716	4.97591	6.84449	1.1574	74.8172
Brunei Darussalam	BRN	2019	-0.390522	25.0404	20.473	45.5134	108.51	38.1776	3.86884	27.7715		77.2834	68.636	81.121	24.104	17.783	20.141	21.897	18.543	20.092	5.28836	7.26788	1.10621	74.7923
Brunei Darussalam	BRN	2020	1.94032	25.431	23.7816	49.2126	110.291	41.4504	1.13357	29.1961		74.9484	68.08	83.166	33.323	22.926	26.852	22.753	20.291	21.433	5.6135	7.71222	1.06148	74.7748
Brunei Darussalam	BRN	2021	1.73341	22.4671	24.8519	47.3189	147.123	37.6286	-1.59076	27.4259		75.027	68.319	81.383	22.956	11.992	16.238	20.006	17.515	18.679	5.92302	8.14309	0.960274	74.7667
Brunei Darussalam	BRN	2022	3.68225	20.1242	23.2553	43.3795	146.974	32.5202	-1.62833	31.1925		77.0126	68.596	80.948	21.819	16.082	18.299	20.921	19.187	20.004	6.20178	8.54046	0.804554	74.7773
Brunei Darussalam	BRN	2023	0.357064	22.8682	27.5947	50.463	136.863	38.8386	1.12764	36.4183		78.2786	69.553	80.407	21.314	16.062	17.955	18.919	14.361	16.524	6.51108	8.98534	0.782882	74.8199
Brunei Darussalam	BRN	2024	-0.388674	22.6553	28.7588	51.4141	132.587	38.9533	4.05252			78.3168	69.594	81.523	21.196	15.972	17.872	18.973	14.426	16.595	6.86785	9.49821	0.818519	74.8983
Brunei Darussalam	BRN	2025										78.4134	69.576		21.546	16.352	18.23	19.031	14.494	16.666
Bulgaria	BGR	2005	5.03884	18.1536	68.7618	86.9154	99.7142	53.5291	7.05635	46.2253	4.1088	56.8193	62.093	72.41	21.08	23.365	22.391	26.503	23.68	25.05	17.3371	25.1288	-0.752977	70.087
Bulgaria	BGR	2006	7.26159	18.1469	66.8884	85.0354	111.047	52.9401	6.80259	47.7948	3.90346	57.4194	64.46	73.396	20.364	18.954	19.578	24.701	19.928	22.244	17.4502	25.2572	-0.759506	70.5075
Bulgaria	BGR	2007	8.40253	16.6883	68.5279	85.2163	123.533	53.9232	6.65439	51.2403	3.68034	56.9553	66.386	74.514	16.011	14.544	15.183	20.638	17.74	19.146	17.5726	25.4408	-0.735282	70.6844
Bulgaria	BGR	2008	12.3487	17.1498	65.6591	82.8089	124.689	53.2163	6.12956	52.6504	4.21909	56.1056	67.979	74.732	11.397	13.822	12.804	18.724	14.971	16.792	17.7279	25.7121	-0.701923	70.9021
Bulgaria	BGR	2009	2.7532	16.7394	62.9774	79.7167	92.6926	56.0934	-3.34714	55.0084	4.27429	57.5098	67.334	74.971	13.859	17.916	16.263	22.318	17.44	19.808	17.9095	26.0605	-0.644281	71.3017
Bulgaria	BGR	2010	2.43899	16.5024	64.164	80.6665	103.381	59.5006	1.55536	58.3549	3.85746	59.9087	66.867	74.516	20.122	23.243	21.95	21.758	20.566	21.145	18.1472	26.5326	-0.658275	71.5149
Bulgaria	BGR	2011	4.2199	15.85	62.6335	78.4835	117.418	57.5905	2.09018	59.8247	3.5469	62.0116	66.122	73.073	23.65	26.031	25.056	22.381	22.417	22.4	18.5191	27.2478	-0.641229	72.6102
Bulgaria	BGR	2012	2.95457	15.791	65.6007	81.3917	123.971	57.1819	0.748815	62.1617	3.4765	62.0024	67.315	73.387	26.017	29.527	28.11	21.462	21.714	21.592	18.9493	28.0764	-0.579221	72.7685
Bulgaria	BGR	2013	0.890094	17.0826	62.4701	79.5527	129.689	58.1902	-0.542751	68.2013	4.05766	62.9813	68.537	73.276	25.671	30.206	28.374	20.622	21.266	20.954	19.3547	28.8982	-2.01699	72.9633
Bulgaria	BGR	2014	-1.41818	16.8331	62.8058	79.6389	130.248	58.7281	0.949449	72.9816		63.0951	68.857	73.922	23.743	23.796	23.774	20.893	19.536	20.194	19.7757	29.7739	-1.21451	73.0845
Bulgaria	BGR	2015	-0.104633	16.0891	62.0747	78.1639	126.737	58.2752	3.39755	78.3		62.8968	69.518	73.384	22.272	21.248	21.653	19.189	17.802	18.474	20.2098	30.6753	-1.27116	73.1031
Bulgaria	BGR	2016	-0.79865	15.5889	60.5324	76.1212	122.806	57.5931	3.02663	80.64		62.9278	68.73	74.626	16.91	17.43	17.224	19.647	16.835	18.198	20.5761	31.4623	-1.29824	73.175
Bulgaria	BGR	2017	2.0616	15.5846	60.2518	75.8364	129.634	57.9587	2.74593	81.2246	4.07756	63.4923	71.457	74.304	12.449	13.249	12.927	18.078	13.75	15.848	20.87	32.128	-1.32391	73.3905
Bulgaria	BGR	2018	2.81454	16.4798	59.6831	76.1629	129.167	60.9476	2.33015	83.1349	4.05202	62.9891	71.511	74.078	11.886	13.191	12.676	15.802	12	13.844	21.1709	32.8088	-1.37146	73.6002
Bulgaria	BGR	2019	3.10373	16.8039	59.1213	75.9252	125.26	61.4967	3.79332	84.7503	4.21429	63.7255	73.389	75.701	8.174	9.19	8.777	13.804	13.302	13.546	21.4795	33.4918	-1.41172	73.7162
Bulgaria	BGR	2020	1.67244	19.3251	57.9966	77.3217	110.424	61.5164	-3.13323	85.5331	4.48297	62.4766	72.438	73.791	13.61	14.504	14.143	15.276	14.169	14.706	21.6868	33.9485	-1.00294	73.324
Bulgaria	BGR	2021	3.29774	18.8943	57.9147	76.809	121.214	62.4284	7.82817	85.3018	4.70924	63.5828	71.982	75.066	15.073	16.084	15.701	13.944	13.214	13.568	21.7032	34.0104	-0.664653	73.3468
Bulgaria	BGR	2022	15.3253	18.2797	57.9186	76.1983	138.845	59.8938	4.08386	84.1294	4.50109	63.2163	73.735	75.411	10.348	10.735	10.582	13.887	11.289	12.55	21.6973	34.0278	-0.650676	73.4799
Bulgaria	BGR	2023	9.44284	18.4564	57.6454	76.1018	119.9	62.4321	1.68151	79.8532		64.1643	74.024	75.743	11.098	12.72	12.049	10.829	11.458	11.152	21.8324	34.3119	-0.286578	73.7323
Bulgaria	BGR	2024	2.44652	19.7573	57.2991	77.0565	110.226	63.7626	3.38709			67.0251	73.204	75.886	11.706	12.979	12.493	11.415	9.625	10.495	22.0303	34.6961	-0.0803072	73.9499
Bulgaria	BGR	2025										67.4344	73.158		9.446	10.589	10.152	11.536	9.752	10.619
Burkina Faso	BFA	2005	6.41504	13.7928	83.1321	96.9249	34.1722	44.5495	8.66187	2.14314	3.94114	20.6833	82.409		7.393	5.341	6.295	35.084	11.144	22.955	2.76554	5.34208	3.1468	22.018
Burkina Faso	BFA	2006	2.33311	15.1021	81.9657	97.0678	35.1065	47.1385	6.25316	2.25788	3.98219	21.6686	82.173	92.519	6.845	4.848	5.776	34.844	10.863	22.693	2.74056	5.28214	3.12035	22.5528
Burkina Faso	BFA	2007	-0.230627	16.6901	78.1414	94.8315	33.7797	48.1789	4.11138	2.4055	4.07983	22.2957	81.93		6.224	4.323	5.205	34.411	11.286	22.701	2.72033	5.24071	3.03278	22.9742
Burkina Faso	BFA	2008	10.6598	14.6701	79.6846	94.3547	35.3853	45.0674	5.79999	2.92968		22.7714	81.693		6.457	4.695	5.513	34.356	11.987	23.041	2.7072	5.22039	2.93817	23.3634
Burkina Faso	BFA	2009	2.60818	15.2196	77.5084	92.728	40.296	45.8897	2.96195	3.26683		23.2733	81.448		6.713	5.094	5.845	34.382	12.739	23.447	2.70124	5.21641	2.91916	23.7452
Burkina Faso	BFA	2010	-0.764231	14.4575	71.5936	86.0511	49.0732	42.1207	8.44628	3.34945	3.50223	24.1341	81.222		6.686	5.258	5.921	34.286	13.445	23.767	2.70028	5.22153	2.92578	24.1151
Burkina Faso	BFA	2011	2.75977	14.2866	68.6961	82.9827	57.4973	40.5626	6.62256	3.91907	3.98515	24.9342	80.988		6.79	5.529	6.114	34.19	14.117	24.066	2.70085	5.22714	2.95657	24.4683
Burkina Faso	BFA	2012	3.81815	14.2546	69.1349	83.3894	61.2386	40.3188	6.45267	4.33793	3.60316	25.7504	80.749		6.792	5.707	6.21	34.107	14.811	24.378	2.69625	5.21802	3.01717	24.8002
Burkina Faso	BFA	2013	0.533739	14.6556	71.5164	86.172	64.0359	41.5589	5.79258	4.57338	4.08344	26.6212	80.494		7.024	6.096	6.525	34.181	15.66	24.844	2.66999	5.16324	3.00084	25.1061
Burkina Faso	BFA	2014	-0.25809	15.4748	70.2225	85.6973	58.8236	42.4959	4.32685	4.8954	4.0533	27.2528	80.225	58.216	7.245	6.483	6.835	34.289	16.538	25.34	2.62944	5.07684	2.97338	25.3814
Burkina Faso	BFA	2015	0.724839	15.9441	71.5231	87.4672	59.0892	44.0578	3.92123	4.90357	3.67009	27.8861	79.956		7.48	6.89	7.162	34.412	17.52	25.893	2.59648	5.00088	2.96196	25.6214
Burkina Faso	BFA	2016	0.441041	16.5071	68.7586	85.2657	57.8932	43.8058	5.95798	5.40541		28.7449	79.698		7.608	7.191	7.383	34.462	18.349	26.332	2.5735	4.93981	2.92508	25.8215
Burkina Faso	BFA	2017	1.483	17.7393	66.5628	84.3022	59.2688	43.968	6.20349	5.83419	5.62847	29.6803	79.444		7.663	7.417	7.53	34.485	19.182	26.759	2.55949	4.89217	2.85292	25.977
Burkina Faso	BFA	2018	1.95594	18.4194	64.2793	82.6987	60.5956	43.5508	6.60457	6.31826	5.48861	30.6327	79.194	71.111	7.683	7.601	7.638	34.472	20.035	27.181	2.55481	4.85791	2.69714	26.0832
Burkina Faso	BFA	2019	-3.23339	20.4999	61.6355	82.1354	60.4087	45.3163	5.8892	6.90533	5.45616	31.4286	78.946	82.878	7.798	7.125	7.432	31.487	17.252	24.297	2.55919	4.8343	2.5299	26.1187
Burkina Faso	BFA	2020	1.8847	19.7841	60.2404	80.0245	60.7398	44.9534	2.01077	7.64277	5.21148	30.3903	76.486		8.873	7.243	7.978	30.806	17.222	23.942	2.56884	4.81197	2.43523	26.3578
Burkina Faso	BFA	2021	3.65327	20.248	61.0703	81.3183	62.4204	45.3591	6.94252	9.30513	5.24913	30.174	75.292		8.774	6.733	7.642	29.279	16.593	22.865	2.57918	4.78475	2.37649	26.8114
Burkina Faso	BFA	2022	14.2902	20.984	66.0416	87.0256	67.5203	46.6197	1.62673	9.67069	5.29457	30.4031	73.655	85.167	8.144	5.611	6.722	27.896	16.122	21.942	2.59466	4.76634	2.30907	27.2791
Burkina Faso	BFA	2023	0.74291	20.8974	63.9589	84.8564	63.1327	47.5753	3.00027	10.1079	5.32758	30.7418	72.454	70.803	8.392	5.163	6.569	31.122	18.626	24.804	2.62071	4.76684	2.26974	27.7872
Burkina Faso	BFA	2024	4.19082	19.406	62.0521	81.458	60.5024	43.9471	4.79981	10.042		31.1556	71.271	72.833	8.793	4.794	6.525	31.123	18.627	24.804	2.65177	4.77399	2.24598	28.3353
Burkina Faso	BFA	2025										31.5581	71.219		8.408	4.939	6.438	31.281	18.686	24.909
Burundi	BDI	2005	13.2521	14.1	90.3964	104.496		37.1552	0.9	2.13503	3.63216	6.80888	79.039		2.792	5.097	3.874	12.202	10.762	11.484	2.34294	4.51515	3.71427	9.18062
Burundi	BDI	2006	2.74542	15.2	94.087	109.287		38.4108	5.41381	2.16555		7.22413	78.027	71.599	2.807	5.138	3.897	11.924	10.666	11.296	2.32912	4.46972	3.60164	9.46463
Burundi	BDI	2007	8.41206	19	91.0135	110.014		43.0883	3.44449	2.26626		7.60143	78.281		2.128	4.075	3.035	10.723	9.618	10.172	2.31502	4.43118	3.69817	9.77289
Burundi	BDI	2008	24.407	20.2	92.591	112.791		41.2312	4.90874	2.49793	5.1929	7.96018	78.506		1.425	2.953	2.133	9.606	8.642	9.125	2.30164	4.38796	4.12553	10.1064
Burundi	BDI	2009	10.5554	19.7661	84.2069	103.973		40.2616	3.78708	2.67791	6.17195	8.19178	78.811		1.473	3.064	2.206	8.813	8.089	8.452	2.28916	4.34606	5.06614	10.498
Burundi	BDI	2010	6.49327	21.9	81.0396	102.94		40.594	5.09374	3.05529	6.77525	8.57724	79.1		1.533	3.207	2.3	7.982	7.489	7.736	2.27387	4.32055	4.68101	10.9843
Burundi	BDI	2011	9.59217	22.9001	86.1545	109.055		41.7537	4.02443		6.31925	9.0076	79.268		1.599	3.367	2.405	7.225	6.919	7.072	2.25646	4.31003	3.5777	11.5617
Burundi	BDI	2012	18.161	23.3593	84.8913	108.251		42.086	4.42303	2.92053	6.16778	9.4593	79.429		1.682	3.573	2.539	6.455	6.33	6.393	2.2409	4.30604	3.56852	12.2245
Burundi	BDI	2013	7.93796	24.7	89.0801	113.78		38.7863	4.92392	3.70342	5.9954	9.91501	79.592		1.787	3.836	2.71	5.677	5.692	5.684	2.22889	4.31031	3.59187	12.9671
Burundi	BDI	2014	4.40535	25.8996	85.4986	111.398		42.3703	4.24491	4.46892	6.78452	10.3183	79.715	76.08	1.919	4.17	2.927	4.967	5.165	5.066	2.21231	4.30565	3.39448	13.784
Burundi	BDI	2015	5.54469	24.7637	83.2929	108.057		43.4303	-0.404526	5.25857	6.37134	10.1047	80.277		1.787	3.768	2.681	5.277	5.445	5.361	2.22314	4.38204	2.26852	14.6695
Burundi	BDI	2016	5.55769	23.7098	78.346	102.056		40.2511	3.20017	3.97909	4.692	10.2045	80.74		1.67	3.399	2.456	5.564	5.952	5.758	2.2694	4.53751	1.72186	15.6181
Burundi	BDI	2017	16.0525	24.1314	73.3907	97.5221		39.5777	3.83186	4.30528	4.76202	10.2181	80.929		1.551	3.029	2.225	5.961	6.419	6.19	2.31608	4.65689	2.35049	16.6241
Burundi	BDI	2018	-2.8147	23.9951	71.3297	95.3248		40.931	5.34224	4.55282	5.07865	10.9452	80.89		1.433	2.663	1.993	7.382	8.694	8.038	2.36074	4.73304	3.01898	17.682
Burundi	BDI	2019	-0.686772	24.4455	69.3656	93.8111		41.9899	4.45934		5.34668	11.7288	80.584		1.312	2.286	1.754	9.076	11.303	10.19	2.40127	4.77851	3.28368	18.7862
Burundi	BDI	2020	7.32111	25.73	61.4712	87.2012		47.1779	0.306444		5.32159	11.5973	79.018	59.157	1.388	2.012	1.69	10.91	11.424	11.167	2.43506	4.8116	2.90865	19.931
Burundi	BDI	2021	8.40454	24.8627	60.5423	85.4049		43.6185	3.23707		4.87114	11.28	79.904		1.406	2.218	1.772	10.701	13.883	12.292	2.46188	4.82541	2.72426	21.1109
Burundi	BDI	2022	18.8009	25.6228	61.2214	86.8442		43.4813	2.3177			11.2488	79.942		1.253	2.25	1.705	11.014	14.034	12.523	2.48585	4.82452	2.70585	22.3202
Burundi	BDI	2023	26.9415	23.492	58.1991	81.6911		43.6323	3.25477	6.02546		11.3346	79.635		1.251	2.24	1.7	11.35	14.383	12.866	2.51029	4.81592	2.72764	23.5535
Burundi	BDI	2024	20.2125					43.222	4.11227			11.5128	79.325		1.249	2.232	1.695	11.327	14.308	12.817	2.5318	4.79788	2.58393	24.8303
Burundi	BDI	2025										11.5557	79.072		1.265	2.176	1.678	11.304	14.236	12.769
Cabo Verde	CPV	2005	0.418892				104.344	71.7877	6.91246	7.33845		61.8416	59.939		25.738	24.011	24.666	35.363	34.019	34.664	5.08621	8.77229	1.19132	57.7978
Cabo Verde	CPV	2006	5.36908				117.817	72.589	7.98375	8.33227	6.5296	62.0344	59.65		25.871	24.135	24.799	35.226	34.273	34.73	5.09407	8.6425	1.1504	58.5333
Cabo Verde	CPV	2007	4.411	18.8589	60.584	79.4429	94.2062	67.3175	15.1707	9.42764	4.95982	62.2016	59.348		25.964	24.246	24.911	35.148	34.599	34.862	5.0783	8.4769	1.10689	59.2876
Cabo Verde	CPV	2008	6.77444	18.1391	58.2106	76.3497	90.9664	66.4825	7.03901	11.6452	5.03465	62.3543	59.031		26.216	24.54	25.199	35.019	34.78	34.895	5.03785	8.27372	1.03555	60.0742
Cabo Verde	CPV	2009	0.991103	19.6271	61.3979	81.025	80.461	66.7104	-1.50359	14.5845	4.86587	62.6075	58.699	65.7	26.789	25.181	25.824	34.868	35.126	35.002	4.97193	8.03262	0.950085	60.9064
Cabo Verde	CPV	2010	2.07866	19.7895	60.2345	80.024	85.5484	67.439	1.83642	17.2397	5.07658	62.8832	62.159		22.281	20.667	21.32	33.58	32.933	33.245	4.90796	7.80234	0.717182	61.7974
Cabo Verde	CPV	2011	4.47388	19.8862	60.01	79.8962	90.5565	67.2516	3.92472	19.8175	4.59785	63.0619	62.231		23.839	21.774	22.619	33.395	32.563	32.966	4.88565	7.6524	0.325686	62.742
Cabo Verde	CPV	2012	2.5404	18.5151	62.0041	80.5191	90.6499	68.6678	1.08365	19.8951	5.3977	63.2715	62.327		25.364	22.786	23.851	33.5	32.282	32.872	4.90561	7.58802	0.0992767	63.726
Cabo Verde	CPV	2013	1.50654	18.751	62.3979	81.1489	86.1699	68.0413	0.632137	22.2468	4.56157	63.4769	62.444		27.148	23.979	25.299	33.2	31.76	32.457	4.95622	7.59142	0.0527251	64.7486
Cabo Verde	CPV	2014	-0.238778	19.7924	62.0186	81.811	91.3039	67.5499	0.696667	23.2704	4.52135	63.7098	62.585		29.16	25.314	26.927	33.176	31.358	32.238	5.03996	7.66318	0.019716	65.8085
Cabo Verde	CPV	2015	0.131188	20.2595	62.3714	82.6309	94.0085	67.1525	0.936027	22.524	4.80622	63.9891	62.752	74.358	31.233	26.623	28.567	33.353	31.039	32.156	5.15658	7.80439	0.0132719	66.9045
Cabo Verde	CPV	2016	-1.40782	19.8316	64.0452	83.8769	95.3781	69.2848	4.28071	23.6935	4.75476	64.2909	62.946		33.335	27.869	30.182	33.137	30.484	31.759	5.30061	8.00929	0.0312211	68.0354
Cabo Verde	CPV	2017	0.784415	17.7675	68.8635	86.631	100.052	69.6071	4.55131	24.5595	4.59278	64.5704	63.161	70.21	35.589	29.159	31.887	33.018	29.916	31.4	5.46527	8.265	0.0661175	69.2
Cabo Verde	CPV	2018	1.257	18.1291	68.5203	86.6494	105.868	67.4291	3.70696	24.2906	4.78792	66.2812	59.477	70.61	32.021	24.47	27.575	32.958	27.788	30.25	5.63793	8.54394	0.101724	70.3971
Cabo Verde	CPV	2019	1.10667	19.8145	66.9461	86.7606	103.603	69.8257	6.94783		4.1653	67.5992	61.779	69.77	33.502	24.711	28.107	28.989	27.09	27.99	5.81429	8.83508	0.134109	71.6254
Cabo Verde	CPV	2020	0.605796	25.7293	73.1155	98.8448	78.3935	65.9834	-20.8053		7.09401	67.329	57.589		41.831	29.946	34.474	30.238	28.485	29.312	5.98266	9.11672	0.111783	72.8839
Cabo Verde	CPV	2021	1.86215	26.5876	75.4181	102.006	77.4551	68.5397	7.03353		6.1549	67.2463	58.543		38.05	27.682	31.656	29.59	27.827	28.657	6.13618	9.31519	0.382032	74.1608
Cabo Verde	CPV	2022	7.93093	22.365	75.3812	97.7462	96.9941	69.0054	15.8437		4.72526	67.1984	61.88		34.48	25.087	28.651	28.993	27.001	27.941	6.32873	9.51735	0.596688	75.0337
Cabo Verde	CPV	2023	3.72438	22.5528	72.1936	94.7464	95.0325	68.887	4.79476		4.34829	67.3842	61.974		33.634	24.522	28.045	28.911	26.96	27.882	6.57945	9.81295	0.497088	75.9064
Cabo Verde	CPV	2024	1.04817	22.0912	73.0274	95.1186	96.5054	68.7246	7.24389			67.5499	62.069		33.582	24.55	28.1	29.049	27.096	28.022	6.85818	10.1461	0.486246	76.7721
Cabo Verde	CPV	2025										67.689	62.238		33.901	24.833	28.415	29.186	27.231	28.161
Cambodia	KHM	2005	6.61526	5.35244	83.0502	88.4026	133.552	39.3541	13.3033	3.77036		24.7015	83.065		1.512	1.948	1.736	11.797	4.534	8.159	3.34315	5.65972	1.45761	19.0923
Cambodia	KHM	2006	5.81069	5.09414	81.0469	86.141	140.349	39.1128	10.9434	6.20006		25.8762	83.367		1.608	2.145	1.886	11.625	4.264	7.933	3.45199	5.7581	1.47594	19.23
Cambodia	KHM	2007	8.70883	5.75606	79.0939	84.8499	133.7	39.1671	10.3985	7.67417	1.36423	27.1527	83.667	79.286	1.706	2.348	2.04	11.453	4.047	7.738	3.56121	5.85213	1.47554	19.4036
Cambodia	KHM	2008	24.0969	5.76284	79.064	84.8268	130.394	39.4865	7.47637	8.92995		28.4051	81.437	73.654	1.136	1.462	1.308	11.814	3.957	7.864	3.66687	5.94555	1.51791	19.6575
Cambodia	KHM	2009	-1.24172	6.2969	79.7068	86.0037	102.288	39.7876	4.07478	10.6747	1.38577	26.3379	84.385	65.816	0.825	0.774	0.798	10.66	3.656	7.13	3.76996	6.04766	1.57666	20.198
Cambodia	KHM	2010	3.9964	6.47508	80.2025	86.6776	109.998	39.7208	5.07692	12.1999	1.24873	29.2411	87.114	89.339	0.939	0.989	0.964	11.505	5.676	8.564	3.87952	6.17294	1.55622	21.1232
Cambodia	KHM	2011	5.47845	6.16017	81.6589	87.8191	109.791	39.0826	7.28666	11.4903	1.20888	26.9805	87.66	93.944	0.423	0.767	0.598	12.492	7.648	10.045	3.99527	6.31861	1.51839	22.3825
Cambodia	KHM	2012	2.93432	5.94561	79.151	85.0967	116.74	39.4003	7.65026		1.23062	29.0427	85.366	94.602	0.563	0.786	0.678	15.215	10.277	12.718	4.12079	6.49445	1.49998	23.9411
Cambodia	KHM	2013	2.94163	5.829	78.3246	84.1536	124.888	40.4062	7.8575		1.57648	31.1947	82.749	80.576	0.704	0.804	0.757	16.392	10.987	13.658	4.25762	6.70119	1.4951	25.7645
Cambodia	KHM	2014	3.85569	5.64093	76.1605	81.8015	124.455	41.6887	8.00032		1.4469	30.2359	83.035	63.07	1.019	1.091	1.056	15.613	11.432	13.499	4.40694	6.93528	1.48244	27.818
Cambodia	KHM	2015	1.22393	5.46108	74.2469	79.708	122.11	42.2063	7.20703	13.6155		32.6102	82.766	75.948	0.973	0.533	0.744	15.036	11.11	13.053	4.56874	7.19467	1.46024	30.0669
Cambodia	KHM	2016	3.01914	5.32085	73.802	79.1228	122.705	41.7636	7.9055			36.6963	84.452	79.66	1.223	1.06	1.137	14.588	10.615	12.586	4.73542	7.46462	1.45861	32.4767
Cambodia	KHM	2017	2.91264	5.2445	71.7483	76.9928	121.155	41.4183	8.07504	12.5182		36.3027	84.413	79.194	0.464	0.307	0.382	13.804	10.599	12.196	4.90884	7.74421	1.38177	35.0128
Cambodia	KHM	2018	2.45909	4.94821	70.7751	75.7233	118.438	40.2203	8.77622	13.2672	1.60337	35.9839	84.973		0.465	0.301	0.38	13.201	10.279	11.741	5.09208	8.03422	1.24368	37.6404
Cambodia	KHM	2019	1.94258	4.80934	66.7251	71.5344	115.737	39.1377	7.93695	12.941	2.13345	35.6588	85.536	73.021	0.466	0.296	0.378	12.662	10.099	11.383	5.27308	8.31673	1.26258	39.583
Cambodia	KHM	2020	2.9403	5.42217	64.3394	69.7616	122.105	39.1436	-3.55572	13.8768	2.24765	37.955	85.369	82.076	0.556	0.398	0.474	12.622	10.628	11.625	5.43874	8.56718	1.47063	39.8327
Cambodia	KHM	2021	2.92073	6.56579	62.8097	69.3755	146.18	36.4869	3.08984	13.5006	1.96233	36.454	82.943	78.518	0.961	0.709	0.83	13.98	12.16	13.067	5.59471	8.7934	1.47678	40.1092
Cambodia	KHM	2022	5.3437	5.89985	60.0176	65.9175	145.874	36.3855	5.1299	14.607	1.95793	36.7654	85.758		0.581	0.785	0.687	12.597	10.275	11.43	5.76695	9.04215	1.33089	40.3746
Cambodia	KHM	2023	2.12747	6.07786	60.3271	66.4049	134.207	36.1518	5.00733	17.4362	2.18091	37.1324	85.879	80.525	0.403	0.98	0.703	11.849	10.209	11.023	5.96119	9.32481	1.28321	40.6291
Cambodia	KHM	2024	0.808042	5.8172	59.7781	65.5953	143.447	35.5947	5.97511	21.4437		37.4015	86.019		0.405	0.979	0.704	11.868	10.177	11.015	6.1637	9.6243	1.22594	40.8727
Cambodia	KHM	2025										37.7215	86.142		0.453	0.948	0.711	11.888	10.147	11.008
Cameroon	CMR	2005	2.01354	10.6902	71.1457	81.8358	44.9977	48.1627	2.22827	6.03904	2.65652	28.0615	82.501	93.265	6.633	6.625	6.629	18.297	7.285	12.78	3.17184	6.01274	2.75574	48.5838
Cameroon	CMR	2006	5.11758	9.92118	71.0492	80.9704	47.1044	47.9296	3.80958	7.07693	2.53991	28.5292	82.48		5.826	5.389	5.6	17.879	6.786	12.321	3.13651	5.93246	2.74855	49.2044
Cameroon	CMR	2007	0.921402	10.0706	70.8094	80.88	53.2157	49.1016	4.32759	7.57397	2.87816	29.0038	82.461	83.114	5.029	4.15	4.576	17.324	6.18	11.741	3.10214	5.85394	2.80628	49.7027
Cameroon	CMR	2008	5.33781	11.0411	72.1125	83.1536	56.9244	49.5995	2.84768	8.20875	2.49827	30.2502	80.771		5.814	4.482	5.118	18.669	6.939	12.793	3.0689	5.77837	2.86258	50.0858
Cameroon	CMR	2009	3.04362	11.2607	73.1909	84.4516	42.1761	50.6233	2.57925	9.40401	2.9079	31.5241	78.963		6.667	4.859	5.709	20.004	7.695	13.838	3.03722	5.70826	2.86539	50.4714
Cameroon	CMR	2010	1.27538	11.4131	72.8593	84.2724	47.2386	50.6327	2.89902	11.5746	2.84803	32.7669	77.037		7.566	5.255	6.322	21.272	8.409	14.829	3.00755	5.64367	2.85766	50.8505
Cameroon	CMR	2011	2.9397	12.0547	72.2755	84.3302	51.522	51.7704	3.37921	12.5102	2.65337	34.1736	75.997		7.386	5.395	6.313	21.895	8.958	15.415	2.97919	5.58277	2.82842	51.223
Cameroon	CMR	2012	2.7353	12.258	72.0239	84.2818	50.036	50.7617	4.62598	13.5363	2.60306	35.5282	74.93		7.169	5.508	6.273	22.346	9.541	15.933	2.94921	5.51841	2.81305	51.5887
Cameroon	CMR	2013	2.05035	12.2644	71.4804	83.7448	49.6745	50.3174	4.99553	15.7713	2.65548	36.9145	73.835		6.954	5.625	6.236	22.792	10.021	16.397	2.91455	5.44263	2.80909	51.9476
Cameroon	CMR	2014	1.8549	12.0589	71.8257	83.8846	50.8324	50.4278	5.71982	16.7536	2.58396	38.3092	72.711	77.356	6.735	5.741	6.198	23.369	10.676	17.015	2.87719	5.35171	3.02592	52.2994
Cameroon	CMR	2015	2.67624	12.2539	73.0581	85.312	45.5401	49.5603	5.66695	17.2971	2.65792	39.0856	71.761		6.769	5.784	6.233	24.25	11.145	17.692	2.84573	5.27038	3.13934	52.6441
Cameroon	CMR	2016	0.87419	12.1243	70.7963	82.9206	40.6386	50.4665	4.53579	12.7047	2.56234	39.9253	70.827		6.839	5.859	6.301	25.639	12.335	18.982	2.82198	5.21301	2.98933	52.9815
Cameroon	CMR	2017	0.640409	11.6804	71.3713	83.0517	39.199	50.3627	3.54118	12.9818	3.05963	40.7579	69.903		6.949	5.971	6.407	26.758	12.844	19.795	2.80367	5.17146	2.835	53.3115
Cameroon	CMR	2018	1.06886	11.92	71.657	83.5771	40.5876	50.4464	3.95551	14.545	3.03096	41.5742	68.976		7.05	6.072	6.503	27.665	13.343	20.498	2.79116	5.13916	2.77031	53.634
Cameroon	CMR	2019	2.4528	12.0964	72.6473	84.7437	43.3785	51.0269	3.47506	15.0529	3.0474	42.3834	68.035		7.137	6.16	6.585	28.815	13.945	21.373	2.7843	5.11143	2.78164	53.9488
Cameroon	CMR	2020	2.43761	12.2819	73.3248	85.6067	33.7388	51.7619	0.259933	15.552	3.1039	41.4413	66.48		8.213	6.741	7.371	30.404	14.724	22.557	2.77685	5.07843	2.72449	54.2558
Cameroon	CMR	2021	2.27186	12.0432	73.543	85.5862	36.7308	50.9413	3.33886	17.1582	2.84931	41.636	65.862	32.465	7.894	6.734	7.225	31.321	15.139	23.223	2.7661	5.03678	2.65496	54.5549
Cameroon	CMR	2022	6.24768	10.5076	73.0287	83.5363	41.2866	49.4046	3.73678	16.4372	2.65952	42.0747	66.15		7.253	6.241	6.667	31.221	15.056	23.131	2.76317	5.00769	2.62905	54.8459
Cameroon	CMR	2023	7.38281	11.2407	73.6587	84.8994	37.8903	50.8744	3.34756	16.0404	2.83908	42.5257	66.14		7.206	6.195	6.621	31.198	15.15	23.166	2.77484	5.0029	2.64245	55.1287
Cameroon	CMR	2024	4.53331	11.5403	72.6113	84.1516	34.4032	50.7191	3.52472	16.6614		43.039	66.135		7.202	6.193	6.618	31.226	15.183	23.196	2.7948	5.01193	2.61268	55.4032
Cameroon	CMR	2025										43.5314	65.783		7.136	6.124	6.548	31.257	15.217	23.227
Canada	CAN	2005	2.21355	19.0759	54.306	73.382	69.7591	62.0335	3.21045		4.76588	75.1874	77.782	78.186	10.59	14.097	12.393	12.772	12.788	12.78	13.0466	18.841	0.947086	79.9761
Canada	CAN	2006	2.00203	19.2488	54.419	73.6678	68.0522	62.7232	2.63794			75.7119	77.984	77.932	10.313	12.86	11.617	12.001	12.402	12.207	13.2121	19.0394	1.01356	80.2191
Canada	CAN	2007	2.13838	19.2505	54.7281	73.9787	66.2834	63.0964	2.0499	63.8298	4.76641	76.2893	78.385	77.679	9.834	12.145	11.022	12.303	11.598	11.942	13.4074	19.3031	0.970654	80.4426
Canada	CAN	2008	2.37027	19.7194	54.4613	74.1808	67.0236	62.7345	0.995406	64.3074	4.62612	76.5524	78.525	77.658	9.815	12.864	11.379	12.289	12.546	12.42	13.6209	19.6114	1.08387	80.6629
Canada	CAN	2009	0.299467	21.9646	57.5729	79.5375	58.4744	66.869	-2.91509	63.6237	4.84058	77.669	78.229	77.81	12.062	17.935	15.059	12.838	14.976	13.928	13.8518	19.9561	1.14471	80.8592
Canada	CAN	2010	1.77687	21.4755	56.9984	78.4738	60.2081	65.7334	3.09081	61.8846	5.35637	77.9616	78.027	77.262	12.135	16.946	14.575	12.961	14.405	13.697	14.1094	20.3518	1.11135	81.0121
Canada	CAN	2011	2.91214	21.1459	55.9027	77.0486	62.4987	64.7982	3.13719	63.1587	5.26205	77.7526	78.035	76.826	12.038	15.715	13.915	12.927	13.446	13.192	14.4297	20.8677	0.975407	81.1031
Canada	CAN	2012	1.51568	21.0578	56.0203	77.0782	62.5955	65.1632	1.75566	63.6033		77.5997	78.205	76.692	12.263	15.745	14.036	12.674	13.802	13.252	14.8207	21.5255	1.08375	81.1513
Canada	CAN	2013	0.938292	20.7043	55.9609	76.6652	62.2311	65.1674	2.32581	65.7477	4.58901	77.7977	78.436	76.502	11.585	14.815	13.243	12.554	13.254	12.914	15.2287	22.2317	1.05338	81.1834
Canada	CAN	2014	1.90664	20.2666	55.7963	76.0629	64.3787	64.902	2.87347	67.1677	4.84359	78.0368	78.095	75.994	11.463	14.853	13.203	12.764	14.285	13.55	15.6232	22.9296	1.00142	81.2112
Canada	CAN	2015	1.12524	20.8778	57.809	78.6868	66.1649	67.001	0.649971	67.2691	4.73938	78.3133	78.281	75.934	10.771	14.618	12.759	12.645	13.857	13.272	16.0102	23.6288	0.7603	81.2466
Canada	CAN	2016	1.42876	21.048	58.4843	79.5324	65.3637	67.9589	1.03855	69.2459	4.81642	78.54	78.288	75.468	10.687	14.396	12.597	12.088	13.635	12.889	16.3881	24.3182	1.13154	81.3023
Canada	CAN	2017	1.59688	20.7033	57.9762	78.6796	65.1011	67.1167	3.03383	70.2687	4.95997	78.731	78.702	75.185	9.564	12.784	11.236	11.545	12.562	12.072	16.7582	24.9862	1.19544	81.4019
Canada	CAN	2018	2.26823	20.6814	57.8869	78.5684	66.5999	66.8658	2.74296	69.3507	4.88898	78.7758	78.738	74.882	9.375	11.94	10.709	11.612	12.769	12.211	17.1297	25.6489	1.43323	81.55
Canada	CAN	2019	1.94927	20.6635	57.7546	78.4181	66.1715	67.6712	1.90843	73.1129	4.77293	79.1588	79.224	74.925	9.339	12.067	10.744	11.218	12.812	12.043	17.5319	26.3698	1.46171	81.7364
Canada	CAN	2020	0.717	22.7011	56.8238	79.5249	61.1568	69.5598	-5.03823	75.2389	4.88795	78.9575	77.724	73.017	19.436	20.763	20.125	16.68	18.972	17.865	17.9854	27.1936	1.08437	81.951
Canada	CAN	2021	3.39519	21.2843	53.8182	75.5768	62.2468	66.3883	5.95053	79.7657	4.7486	79.299	79.507	74.035	12.536	14.517	13.557	11.364	14.178	12.815	18.4823	28.0994	0.553902	82.1779
Canada	CAN	2022	6.8028	20.4184	53.0789	74.0816	67.3176		4.18904	78.8985	4.88022	79.3229	79.901	73.447	8.92	11.21	10.082	10.289	12.841	11.599	18.9407	28.9122	1.8039	82.3501
Canada	CAN	2023	3.879	20.9054	54.3804	76.0355	66.6323		1.52875	76.2586		79.5146	80.298	73.517	9.993	11.587	10.806	10.848	12.584	11.735	19.3581	29.628	2.90468	82.5251
Canada	CAN	2024	2.38158			77.0328	65.1499		1.5548			79.9376	79.873	73.464	11.975	14.537	13.276	11.859	14.076	12.988	19.7996	30.4192	2.9622	82.7003
Canada	CAN	2025										80.1469	79.997		12.114	15.443	13.8	11.889	14.103	13.014
Cayman Islands	CYM	2005																			5.41277	7.17259	3.11725	100
Cayman Islands	CYM	2006						83.5483		19.4578											5.37817	7.1014	3.03959	100
Cayman Islands	CYM	2007						84.4321	3.16263	22.1045											5.33641	7.02159	2.97206	100
Cayman Islands	CYM	2008						85.0079	-0.357401	33.0196											5.31069	6.96696	2.90387	100
Cayman Islands	CYM	2009						86.9002	-7.20048												5.32132	6.96673	2.82762	100
Cayman Islands	CYM	2010	0.276141					87.61	-2.71564												5.37723	7.0349	2.77574	100
Cayman Islands	CYM	2011	1.32544					87.3134	1.16906					90.15							5.48047	7.1765	2.74754	100
Cayman Islands	CYM	2012	1.18895					87.1902	1.22975					89.59							5.6226	7.37519	2.71433	100
Cayman Islands	CYM	2013	2.16061					87.1981	1.27933												5.76762	7.56806	2.62384	100
Cayman Islands	CYM	2014	1.27398					87.3155	2.65453					88.11							5.94161	7.79719	2.53349	100
Cayman Islands	CYM	2015	-2.34753					87.4374	2.83312					85.95							6.15647	8.08169	2.43358	100
Cayman Islands	CYM	2016	-0.625258					86.8624	3.23997												6.38268	8.37789	2.33773	100
Cayman Islands	CYM	2017		2.01384			117.437	87.1043	3.18405												6.61806	8.69061	2.24869	100
Cayman Islands	CYM	2018		2.11133			117.117	86.1171	4.26727		2.16377										6.87362	9.03258	2.15527	100
Cayman Islands	CYM	2019		2.35481			114.839	86.167	3.91564		1.1367										7.16355	9.41735	2.08009	100
Cayman Islands	CYM	2020		2.559			105.473	86.789	-4.95481		1.45542										7.4471	9.78835	1.99549	100
Cayman Islands	CYM	2021						85.2434	4.86942		1.31253										7.76379	10.2302	2.05206	100
Cayman Islands	CYM	2022						85.5716	5.77567		1.48894										8.13784	10.7777	2.09325	100
Cayman Islands	CYM	2023						85.9839	5.81559		1.57024										8.54144	11.3627	2.00105	100
Cayman Islands	CYM	2024																			8.99775	12.0259	1.92419	100
Central African Republic	CAF	2005	2.88352	8.70797	89.5497	98.2577	35.0709		0.908211		1.65222	17.9351	72.834		11.661	9.505	10.554	36.819	22.861	29.793	2.17169	4.11497	2.26343	38.0449
Central African Republic	CAF	2006	6.69526	6.85807	90.6716	97.5297	36.3959		4.77109	1.08675	1.41506	18.3187	72.848		11.442	9.287	10.335	36.728	22.709	29.672	2.15327	4.08355	2.04865	38.1344
Central African Republic	CAF	2007	0.959918	6.36687	92.2961	98.663	37.5809		4.60753		1.31332	18.7104	72.88		11.34	9.212	10.245	36.652	22.595	29.576	2.1402	4.06878	1.92738	38.2343
Central African Republic	CAF	2008	9.25895	7.05239	92.6494	99.7018	34.4375		2.05413	2.16496	1.29001	18.7988	72.896		11.176	9.079	10.096	36.634	22.507	29.523	2.13386	4.06352	2.13301	38.3474
Central African Republic	CAF	2009	3.52126	7.18439	86.8472	94.0315	31.4942	29.3114	8.58726	2.30814	1.25458	20.0115	72.952		11.307	9.151	10.21	36.863	22.115	29.558	1.99634	3.81053	-0.658825	38.4767
Central African Republic	CAF	2010	1.49102	7.63618	82.2902	89.9264	34.4305	29.3294	4.63082	2.53881	1.11761	20.8797	73.013		11.487	9.207	10.338	36.851	21.437	29.331	1.85815	3.56002	-0.799202	38.6245
Central African Republic	CAF	2011	1.19448	7.14771	83.4621	90.6098	34.4756	28.57	4.19462	2.95498	1.10792	21.2931	73.099		11.347	9.065	10.187	36.454	20.922	28.844	1.86645	3.60192	1.59036	38.8031
Central African Republic	CAF	2012	5.4783	10.9199	88.2053	99.1252	33.0594	30.8711	5.05376	2.7752	1.98035	22.0244	73.242		11.142	8.858	9.966	36.331	20.467	28.517	1.8812	3.67435	0.998867	39.0302
Central African Republic	CAF	2013	6.98879	17.3592	83.5788	100.938	38.3993	40.8558	-36.392		2.63821	19.3856	73.28		10.908	8.769	9.798	36.394	20.592	28.573	1.89541	3.75215	0.682378	39.3043
Central African Republic	CAF	2014	14.8987	15.5309	82.2218	97.7527	53.0951	42.7402	0.0810705		2.22015	19.6252	73.471		10.756	8.788	9.726	36.209	20.313	28.323	1.90701	3.84174	-0.415235	39.6227
Central African Republic	CAF	2015	1.40297	14.7768	82.4275	97.2043	53.1451	43.2316	4.33712		1.91023	20.3543	73.6		10.835	8.888	9.809	36.34	20.333	28.379	1.95385	3.98423	0.132678	39.9824
Central African Republic	CAF	2016	4.94543	14.4081	84.0154	98.4235	50.5306	42.7611	4.75032		1.75409	20.824	73.604		10.764	8.841	9.746	36.679	20.639	28.675	2.03201	4.14961	1.80553	40.3809
Central African Republic	CAF	2017	4.18072	14.067	82.9557	97.0227	57.1435	42.9439	4.52728		1.75365	21.2975	73.615		10.631	8.923	9.726	36.772	20.882	28.833	2.09752	4.2914	1.67978	40.8151
Central African Republic	CAF	2018	1.61216	7.70001	93.7001	101.4	49.6602	43.0086	3.78944		1.56588	21.5873	73.624		10.414	8.832	9.574	36.876	21.037	28.954	2.16204	4.4313	1.76068	41.2825
Central African Republic	CAF	2019	2.68537	8.04464	96.0888	104.133	50.0658	40.1296	3.1		1.76792	21.9632	73.618		10.542	8.833	9.637	37.209	21.146	29.203	2.18855	4.48552	1.34469	41.78
Central African Republic	CAF	2020	1.71016	9.67704	91.2003	100.877	49.521	39.0027	0.9		2.14468	20.4826	72.916		12.008	9.84	10.863	38.298	22.051	30.227	2.20062	4.50135	1.64325	42.3051
Central African Republic	CAF	2021	4.25936	9.14075	92.8404	101.981	44.1591	42.4647	0.98292		1.87252	20.1922	72.824		11.969	9.813	10.831	38.19	22.14	30.219	2.22177	4.55514	1.68609	42.8548
Central African Republic	CAF	2022	5.58317	8.33528	97.365	105.7	45.2336	42.4276	0.453902		2.11509	20.3934	73.598		11.227	9.035	10.078	37.935	21.386	29.818	2.1437	4.40715	-0.275432	43.2752
Central African Republic	CAF	2023	2.97914	8.33528	97.365	105.7	43.4806	40.5108	0.699968		1.82996	20.6176	73.595		11.003	8.807	9.861	37.951	21.106	29.757	2.09528	4.29906	1.06107	43.6984
Central African Republic	CAF	2024	1.47734	9.13063	97.8625	106.993	46.4319	42.0803	1.5			20.4991	73.604		11.196	8.895	9.991	38.012	21.327	29.845	2.15107	4.40382	3.4014	44.1244
Central African Republic	CAF	2025										20.5464	73.582		11.297	8.999	10.086	38.096	21.516	29.933
Chad	TCD	2005	7.89037	7.82752	61.4554	69.283	77.5775	29.1811	17.3325	1.41597	1.69477	17.2332	66.7		0.419	1.57	1.018	45.278	23.985	34.607	2.51817	5.14687	4.0311	21.7519
Chad	TCD	2006	8.03629	8.38956	61.4364	69.826	77.0816	27.0031	-0.54283			17.4045	66.204		0.45	1.702	1.104	45.54	24.159	34.816	2.45419	5.01619	3.59764	21.763
Chad	TCD	2007	-8.97474	10.5513	59.2479	69.7992	75.106	27.8661	4.20017			17.646	65.701		0.49	1.879	1.22	45.805	24.334	35.024	2.39307	4.8935	3.44476	21.7709
Chad	TCD	2008	10.297	10.8614	59.5167	70.3781	69.0678	27.0698	3.08119	1.95049		17.8543	65.197		0.517	1.948	1.273	46.074	24.485	35.223	2.33604	4.77105	3.49922	21.7756
Chad	TCD	2009	9.95242	12.2787	67.1085	79.3873	64.8598	30.0492	-1.40828	2.01651	2.31174	18.2892	64.692		0.534	1.971	1.297	46.309	24.6	35.385	2.28304	4.65678	3.57297	21.7784
Chad	TCD	2010	-2.07787	10.9371	62.0629	73	63.7312	26.484	13.6738	2.09627	1.98194	18.2849	64.184		0.543	1.958	1.299	46.476	24.701	35.507	2.23336	4.55715	3.46077	21.8472
Chad	TCD	2011	2.02924	12.0219	55.2269	67.2488	57.5438	29.3197	4.49543	2.21313	2.2579	18.58	63.67		0.558	1.971	1.317	46.663	24.814	35.647	2.18698	4.45715	3.5302	21.9559
Chad	TCD	2012	7.51662	11.4888	51.1735	62.6623	54.3852	27.5282	9.0618		2.20615	18.7482	63.153		0.565	1.944	1.309	46.883	24.84	35.761	2.14242	4.35811	3.51265	22.1062
Chad	TCD	2013	0.222672	11.3877	55.9375	67.3252	51.5308	27.2751	2.83822		2.85071	19.2097	62.635		0.59	2.012	1.362	47.131	24.928	35.922	2.1009	4.26273	3.56948	22.2976
Chad	TCD	2014	1.68197	8.71276	56.3412	65.054	40.8116	29.1572	2.06283	3.38821	2.32031	19.4328	62.115		0.609	2.042	1.39	47.366	25	36.07	2.07314	4.19502	3.56999	22.5295
Chad	TCD	2015	4.37713	6.99883	62.8035	69.8023	48.5115	30.5026	3.30416	3.22751	2.34283	19.6863	61.592		0.63	2.083	1.426	47.679	25.416	36.429	2.05939	4.16763	3.18336	22.8011
Chad	TCD	2016	-0.792441	10.8312	69.5522	80.3835	43.958	33.3539	-4.1225		2.38848	20.0972	61.067		0.652	2.124	1.463	47.968	25.62	36.67	2.0516	4.15003	3.13869	23.112
Chad	TCD	2017	-1.5371	9.56813	68.814	78.3822	43.2901	32.4399	-1.61747		2.45482	20.4399	60.54		0.671	2.156	1.493	48.239	25.804	36.894	2.04749	4.13187	3.3064	23.4613
Chad	TCD	2018	4.27462	8.1552	64.9674	73.1226	46.7384	30.7914	5.74112		2.25948	20.6894	60.012	67.773	0.685	2.172	1.512	48.435	25.916	37.047	2.04666	4.11759	3.35956	23.8486
Chad	TCD	2019	-0.971939	8.48865	63.9612	72.4498	46.6777	31.0793	5.38282		2.37246	20.9057	59.983		0.677	2.146	1.494	48.451	25.946	37.069	2.04846	4.11093	3.21991	24.2731
Chad	TCD	2020	4.46414	9.63714	65.6445	75.2817	40.6428	32.1091	-0.393647	4.39666	2.7396	19.5414	59.412		0.952	2.615	1.877	48.666	26.229	37.317	2.04773	4.09658	3.18197	24.7342
Chad	TCD	2021	-0.772844	9.33553	62.0957	71.4313	43.9465	30.7213	0.293443		2.88813	19.2995	59.385		0.891	2.925	2.018	48.645	26.363	37.376	2.04728	4.07252	3.44424	25.2312
Chad	TCD	2022	5.78803	8.80517	57.741	66.5462	47.9884	28.3479	4.1297		2.60161	19.1208	59.805		0.65	2.085	1.459	48.826	25.938	37.252	2.05551	4.06703	3.45669	25.7636
Chad	TCD	2023	10.8364	9.39409	59.9573	69.3514	46.8951	30.3203	3.98004		3.2015	19.4424	59.742		0.646	2.075	1.452	48.988	26.051	37.399	2.07477	4.05324	4.57399	26.3305
Chad	TCD	2024	8.89951	9.36176	52.1671	61.5289	47.868	29.781	4.19926			19.5723	59.649		0.643	2.072	1.452	49.145	26.153	37.537	2.10054	4.05237	4.94853	26.9315
Chad	TCD	2025										19.7619	59.503		0.617	2.095	1.457	49.32	26.264	37.674
Channel Islands	CHI	2005										80.4219	71.8		14.134	12.768	13.41	11.643	7.453	9.534	15.0206	21.9692	0.712405	31.1068
Channel Islands	CHI	2006										80.6507	71.903		13.375	11.893	12.588	11.207	7.029	9.096	15.0871	22.0151	0.708014	31.3351
Channel Islands	CHI	2007										80.8681	72.008		12.156	10.81	11.44	10.699	6.722	8.684	15.1238	22.0134	0.707543	31.5692
Channel Islands	CHI	2008										81.1799	72.033		12.424	11.444	11.902	10.828	7.026	8.898	15.2096	22.1018	0.70513	31.7972
Channel Islands	CHI	2009										81.6958	71.925		15.322	16.898	16.165	12.313	9.923	11.098	15.364	22.313	0.702732	32.007
Channel Islands	CHI	2010							-3.60663			82.0487	72.251		16.277	17.774	17.077	12.876	10.566	11.701	15.5299	22.5526	0.702241	32.1868
Channel Islands	CHI	2011							1.12504			82.2465	71.797		17.77	18.396	18.106	13.203	10.755	11.955	15.8322	23.0631	0.681692	32.3263
Channel Islands	CHI	2012							-5.75366			82.6204	72.202		19.769	20.718	20.279	13.816	11.728	12.749	16.2747	23.8636	0.662149	32.4414
Channel Islands	CHI	2013							0.493931			82.8336	72.232		20.771	22.425	21.659	14.196	12.769	13.464	16.6574	24.571	0.626273	32.5432
Channel Islands	CHI	2014							2.4271			82.9799	71.928		19.835	21.15	20.544	13.338	11.615	12.453	16.9809	25.1635	0.584896	32.6276
Channel Islands	CHI	2015							0.374367			83.2034	72.145		18.134	19.52	18.882	12.373	10.735	11.529	17.3174	25.762	0.44638	32.6908
Channel Islands	CHI	2016						91.7032	1.21302			83.4146	72.262		17.502	17.728	17.624	12.07	9.92	10.961	17.6673	26.3775	0.262115	32.7426
Channel Islands	CHI	2017						91.3172	1.80648			83.5973	72.295		15.609	15.985	15.811	11.154	9.182	10.138	18.0015	26.9883	0.26569	32.7853
Channel Islands	CHI	2018						91.4442	1.12224			83.8233	72.319		13.602	14.366	14.013	10.308	8.325	9.288	18.3059	27.5409	0.382667	32.8126
Channel Islands	CHI	2019						91.3212	1.57336			84.0441	72.371		13.444	14.014	13.75	10.085	8.243	9.139	18.5852	28.0216	0.417439	32.8235
Channel Islands	CHI	2020						91.6963	-8.89678			84.512	71.609		15.498	16.168	15.857	11.101	9.676	10.369	18.866	28.5029	0.359173	32.8247
Channel Islands	CHI	2021						90.4148	9.9368			84.5714	72.277		15.804	15.458	15.619	10.567	8.885	9.703	19.1063	28.9048	0.303926	32.8148
Channel Islands	CHI	2022						90.9677	5.34196			84.6602	72.523		13.343	13.037	13.183	8.999	7.367	8.161	19.3435	29.2879	0.28387	32.792
Channel Islands	CHI	2023						91.181	3.71501			84.8846	72.046		13.283	13.468	13.382	9.033	7.385	8.186	19.6644	29.8217	0.284259	32.7554
Channel Islands	CHI	2024										85.1019	71.964		13.543	13.834	13.699	8.874	7.341	8.087	20.03	30.4567	0.25907	32.7056
Channel Islands	CHI	2025										85.2926	71.911		14.128	14.125	14.126	8.911	7.327	8.098
Chile	CHL	2005	3.05258	10.9536	57.4901	68.4437	72.0625	52.1481	5.83705	50.2736	3.28017	65.9922	60.914		30.385	18.781	23.407	25.998	14.54	20.165	9.08978	13.6041	0.992481	86.7768
Chile	CHL	2006	3.39202	10.2971	53.4969	63.794	73.7116	48.4126	6.04999	49.3217	3.04015	66.4432	62.139	86.186	27.717	18.543	22.111	25.508	14.473	19.888	9.26621	13.7796	0.976434	86.8125
Chile	CHL	2007	4.4078	10.546	53.8233	64.3693	76.977	49.5482	5.16823	54.723	3.23316	66.8772	62.711		26.871	18.243	21.64	25.756	15.143	20.349	9.44141	13.959	0.978803	86.8445
Chile	CHL	2008	8.71627	11.2649	58.1896	69.4546	80.6766	54.4485	3.78939	56.7744	3.7919	67.178	64.121		29.521	20.007	23.763	26.863	16.337	21.499	9.61802	14.1521	0.999138	86.8766
Chile	CHL	2009	0.353045	12.8685	56.6662	69.5348	66.686	55.5112	-1.11804	59.9913	4.25476	67.6915	64.009	83.601	31.272	23.64	26.739	27.825	18.753	23.202	9.80308	14.3677	1.00887	86.9125
Chile	CHL	2010	1.41071	12.5462	56.588	69.1342	69.7177	53.8128	5.85165	66.3445	4.18954	68.1071	66.299	84.992	21.94	17.164	19.058	24.535	14.728	19.536	9.99766	14.6038	1.00455	86.956
Chile	CHL	2011	3.34122	12.3112	58.1446	70.4558	72.4816	54.3698	6.2239	70.8242	4.06173	68.1245	67.64	85.674	21.473	15.609	18.003	24.521	14.038	19.176	10.2035	14.863	0.986604	87.0109
Chile	CHL	2012	3.00745	12.3259	59.3477	71.6736	68.1561	56.2982	6.15534	75.0771		67.9049	67.77	86.65	19.568	15.079	16.927	22.744	13.531	18.046	10.427	15.16	0.959563	87.0825
Chile	CHL	2013	1.78956	12.7856	60.6858	73.4714	65.1433	57.221	3.30851	79.8703	4.54814	68.411	67.963	86.051	19.789	14.479	16.682	22.946	14.057	18.413	10.6788	15.512	0.953745	87.1828
Chile	CHL	2014	4.71868	13.2263	61.2424	74.4687	65.6346	57.1529	1.79265	83.663	4.75168	69.0473	68.349	84.508	19.828	14.964	16.976	23.731	14.374	18.96	10.9546	15.9117	0.996818	87.3134
Chile	CHL	2015	4.34877	13.5921	61.7754	75.3675	59.3491	58.3447	2.15194	86.4181	4.9039	68.9807	68.526	85.283	18.341	14.072	15.813	23.473	15.086	19.198	11.2497	16.3486	1.02157	87.4653
Chile	CHL	2016	3.78619	14.3427	62.1601	76.5028	56.0579	58.9826	1.75304	88.8459	5.36647	69.7621	68.595	84.681	17.712	14.442	15.799	21.1	14.037	17.502	11.5449	16.7814	1.20942	87.6306
Chile	CHL	2017	2.18272	14.6487	62.078	76.7267	56.0262	58.2768	1.3577	89.922	5.43279	70.2091	69.43	84.125	19.684	16.278	17.732	21.725	14.95	18.277	11.8131	17.1575	1.58395	87.8
Chile	CHL	2018	2.43489	14.8565	62.0594	76.9159	58.1771	58.0013	3.99003	91.1975	5.47306	70.6994	69.901	83.969	20.638	16.177	18.138	20.615	14.973	17.747	12.0637	17.5018	1.78539	87.962
Chile	CHL	2019	2.55754	15.254	61.6695	76.9234	57.6118	58.8832	0.634368	92.066	5.62631	71.1058	69.792	84.128	19.884	18.207	18.953	19.47	15.65	17.53	12.3261	17.8714	1.59912	88.1274
Chile	CHL	2020	3.04549	16.0264	58.4375	74.4639	58.1829	56.3446	-6.14347	89.1125	5.62993	70.8824	63.254	80.132	26.024	23.215	24.377	20.579	17.907	19.222	12.6268	18.3102	0.896492	88.2953
Chile	CHL	2021	4.52457	14.7373	62.0484	76.7857	64.8774	54.9981	11.3149	96.2228	4.99924	70.4492	64.904	82.282	22.594	18.944	20.477	17.246	13.485	15.335	12.9564	18.7919	0.441498	88.4661
Chile	CHL	2022	11.6439	14.725	63.465	78.1899	75.2016	55.3721	2.15399	99.3373	4.89753	70.8322	67.899	84.06	19.879	17.096	18.287	16.042	12.849	14.42	13.3001	19.2916	0.49579	88.6395
Chile	CHL	2023	7.58168	15.2993	60.4412	75.7405	60.7247	57.6027	0.521368	104.734		71.6855	69.496	85.023	24.323	20.189	21.973	16.7	13.986	15.321	13.6933	19.8677	0.539629	88.8159
Chile	CHL	2024	4.29764	15.0673	58.1062	73.1735	63.8599	56.0775	2.64431			72.1008	70.631	84.838	23.621	18.944	20.988	14.95	12.607	13.759	14.1351	20.5157	0.537425	88.9951
Chile	CHL	2025										72.4344	70.9		24.72	19.227	21.635	15.06	12.666	13.843
China	CHN	2005	1.77641	14.98	39.813	54.793	61.3601	42.1356	11.4582	18.6565		31.3998	78.104		8.366	10.498	9.495	20.663	13.567	16.976	7.88963	10.9859	0.588125	42.99
China	CHN	2006	1.64943	15.033	38.0008	53.0337	63.5696	42.6377	12.6747	20.5668		32.2001	77.849		8.226	10.299	9.331	20.852	13.673	17.114	8.05386	11.1312	0.558374	44.343
China	CHN	2007	4.81677	14.8436	36.6183	51.4619	61.2665	43.7213	14.15	21.4716		32.4	77.609		8.141	10.164	9.224	20.489	13.462	16.822	8.21259	11.3094	0.522272	45.8892
China	CHN	2008	5.92525	14.7289	35.5422	50.2711	56.7111	43.7536	9.67025	21.8667		33.2001	77.363		8.661	10.782	9.803	20.287	13.429	16.7	8.35535	11.4806	0.512387	46.9895
China	CHN	2009	-0.728165	14.9932	35.5789	50.5721	44.4198	45.3482	9.4027	23.2886		34.1	77.12		8.977	11.143	10.15	20.058	13.279	16.504	8.49818	11.6643	0.497381	48.3417
China	CHN	2010	3.17532	14.8378	34.6031	49.4409	49.8541	45.1269	10.5963	25.2883		34.5996	76.894		8.698	10.763	9.823	19.334	12.756	15.877	8.66147	11.8871	0.48296	49.234
China	CHN	2011	5.5539	15.5115	35.2495	50.7611	49.9458	45.1659	9.46134	26.7875		35.7001	76.911		8.851	10.904	9.976	18.67	12.371	15.351	8.85917	12.1694	0.546458	51.83
China	CHN	2012	2.61952	15.9048	35.7107	51.6155	47.4802	46.3529	7.85617	29.3082		36.0998	76.585		9.026	11.074	10.154	17.913	11.948	14.761	9.0892	12.5172	0.678345	53.1003
China	CHN	2013	2.62105	15.9463	36.1289	52.0752	45.916	47.8217	7.77872	32.7192		38.4998	76.301		9.187	11.229	10.316	16.928	11.394	13.996	9.35627	12.934	0.666073	54.49
China	CHN	2014	1.92164	15.8783	36.9862	52.8645	44.0685	49.2349	7.4619	43.711		40.5991	76.183		9.372	11.413	10.507	15.841	10.895	13.214	9.6662	13.4243	0.630326	55.7503
China	CHN	2015	1.43702	16.2578	38.0606	54.3184	38.6972	51.7284	6.97878	47.1193		42.3997	76.09		9.542	11.579	10.68	15.092	10.466	12.628	10.0534	14.0355	0.581456	57.3298
China	CHN	2016	2	16.4005	39.1624	55.5628	36.1772	53.2882	6.77556	49.3091		42.9334	75.955		9.46	11.445	10.574	14.529	10.046	12.135	10.4908	14.7333	0.573051	58.8399
China	CHN	2017	1.59314	16.5018	38.9548	55.4565	36.9509	53.5417	6.89127	51.0679		43.3458	75.735		9.342	11.274	10.431	13.909	9.641	11.625	10.981	15.5393	0.605245	60.2403
China	CHN	2018	2.07479	16.8365	38.9435	55.78	36.8944	54.1052	6.75672	53.3988		43.8847	75.519		8.672	10.444	9.674	12.799	8.837	10.675	11.5162	16.4153	0.467672	61.5002
China	CHN	2019	2.89923	17.151	39.352	56.503	35.1994	55.2296	6.0685	56.6051		44.5193	75.415		9.582	11.521	10.681	12.575	9.052	10.683	12.0614	17.2945	0.354741	62.7099
China	CHN	2020	2.41942	17.6038	38.1685	55.7723	34.039	55.5483	2.34019	61.6125		45.2679	74.014		11.36	13.621	12.65	13.683	10.687	12.072	12.6452	18.2208	0.238041	63.5234
China	CHN	2021	0.981015	16.3512	38.374	54.7252	36.5207	54.8182	8.57009	66.8186		45.597	75.936		11.141	13.366	12.404	12.305	9.598	10.848	13.2057	19.08	0.0892522	64.7211
China	CHN	2022	1.97358	16.6627	37.7772	54.4399	37.4407	54.9576	3.13419	71.5799		44.9886	74.821		13.153	15.867	14.673	11.908	9.77	10.756	13.7819	19.946	-0.0130995	65.2176
China	CHN	2023	0.234837	17.1891	39.5682	56.7574	36.1052	56.338	5.41484	74.5933	4.00128	45.7724	75.202		13.935	16.853	15.562	11.929	10.058	10.92	14.3161	20.7196	-0.103795	65.5301
China	CHN	2024	0.218129	16.6333	39.9268	56.5601	37.1984	56.7483	4.97736	76.8758		46.1511	74.36		13.461	16.315	15.044	11.813	10.023	10.847	14.6653	21.1538	-0.123063	65.8947
China	CHN	2025										46.5308	74.025		14.21	17.07	15.795	12.184	10.414	11.229
Colombia	COL	2005	5.05102	13.9562	67.8682	81.8244	37.4227	53.1705	4.82876	32.254	4.02099	59.9143	68.354	81.368	29.677	17.864	22.595	38.661	17.021	27.721	4.9893	7.72009	1.40026	76.0049
Colombia	COL	2006	4.29342	13.8806	67.3646	81.2452	39.6414	52.5107	6.71687	34.3662	3.91672	60.57	67.733		29.139	17.801	22.328	37.535	16.937	27.117	5.11902	7.87215	1.32543	76.1619
Colombia	COL	2007	5.54438	13.73	67.0483	80.7783	37.0989	52.9549	6.73819	35.4785	4.08301	61.764	67.117	75.015	28.748	17.859	22.195	36.615	17.008	26.695	5.27399	8.05859	1.26689	76.3144
Colombia	COL	2008	6.99688	13.1439	66.0836	79.2275	39.1676	52.0115	3.28345	37.9448	3.93878	62.1661	67.497	75.43	29.784	18.169	22.804	35.444	15.874	25.54	5.45088	8.27547	1.20339	76.4597
Colombia	COL	2009	4.20252	13.8041	66.5154	80.3196	35.1561	53.48	1.13965	39.5088	4.77652	61.8401	70.388	77.029	30.942	18.495	23.542	34.664	15.487	24.958	5.64251	8.51196	1.16491	76.5964
Colombia	COL	2010	2.272	13.7602	65.9339	79.6942	34.2646	53.3991	4.49466	41.5297	4.83383	62.1818	70.537	77.769	28.945	18.189	22.572	32.144	14.943	23.437	5.84187	8.7586	1.13597	76.7233
Colombia	COL	2011	3.41503	13.3493	64.5726	77.9218	39.4704	51.4401	6.94789	45.2873	4.46608	61.9676	71.097	78.375	27.497	16.876	21.169	31.785	14.483	23.026	6.05765	9.0303	1.07134	76.839
Colombia	COL	2012	3.1693	13.4755	65.6326	79.1081	38.8352	51.9873	3.91264	47.467	4.37039	62.4297	71.823	79.053	26.407	15.735	20.086	31.177	14.102	22.532	6.29379	9.33207	1.00291	76.9422
Colombia	COL	2013	2.01699	14.0973	65.5339	79.6312	37.9866	53.3512	5.13399	50.7475	4.87855	64.0617	71.129	78.46	24.872	14.457	18.729	30.405	13.972	22.084	6.54463	9.65332	0.948709	77.0316
Colombia	COL	2014	2.89884	14.2438	65.9709	80.2147	37.4875	54.6341	4.49903	53.1794	4.62946	64.4365	70.979	78.028	23.562	14.564	18.245	29.229	13.773	21.402	6.8188	10.0103	0.892712	77.1058
Colombia	COL	2015	4.98983	14.8116	68.475	83.2866	38.3608	56.2155	2.9559	54.7961	4.47039	64.7712	71.171	77.793	23.212	13.259	17.316	29.715	12.788	21.141	7.10913	10.3933	0.864942	77.1636
Colombia	COL	2016	7.51346	14.5413	69.0597	83.601	36.2027	56.8986	2.08738	57.1437	4.47721	65.2478	70.669	77.097	23.563	14.52	18.274	28.795	13.668	21.131	7.38858	10.7555	0.990549	77.2036
Colombia	COL	2017	4.31431	14.8806	68.5123	83.393	35.2829	57.6083	1.35936	58.396	4.53551	64.4222	70.387	76.463	24.036	14.508	18.467	30.013	13.876	21.837	7.65248	11.0838	1.45148	77.2245
Colombia	COL	2018	3.24057	15.4215	68.1184	83.5398	36.5348	57.6527	2.56432	57.3205	4.4491	63.867	69.756	75.301	24.974	15.609	19.45	31.054	14.841	22.841	7.91335	11.4021	1.83914	77.2805
Colombia	COL	2019	3.52302	15.7732	68.6686	84.4418	37.5585	58.1365	3.18686	56.6663	4.51069	64.3962	68.992	74.637	26.182	16.739	20.658	31.922	16.118	23.917	8.19032	11.753	1.78616	77.4596
Colombia	COL	2020	2.52664	17.1588	70.724	87.8829	34.0556	60.1218	-7.18591	55.7331	5.26166	64.37	68.244		35.191	21.708	27.248	35.96	19.255	27.497	8.46413	12.1139	1.43632	77.6383
Colombia	COL	2021	3.49506	16.0463	72.7019	88.7482	40.0591	58.193	10.8012	58.3159		64.8783	69.517	75.218	32.09	19.599	24.757	35.908	18.852	27.264	8.71355	12.4501	1.09643	77.834
Colombia	COL	2022	10.1772	14.005	73.7136	87.7187	48.2827	54.9087	7.32828	59.2901		65.028	68.275	80.584	26.45	17.117	20.972	31.732	17.316	24.423	9.00656	12.8591	1.06829	78.0465
Colombia	COL	2023	11.7359	14.6541	73.631	88.2851	40.3881	56.7402	0.71238			65.6109	69.06	81.302	23.75	16.234	19.365	30.037	16.659	23.251	9.37543	13.3884	1.12093	78.2756
Colombia	COL	2024	6.60909	14.8893	73.1155	88.0048	37.0255	58.143	1.59833			65.7242	68.996	81.044	23.976	16.164	19.411	29.873	16.632	23.152	9.77844	13.9793	1.07448	78.5211
Colombia	COL	2025										65.8427	69.096		22.332	14.315	17.653	29.977	16.667	23.217
Comoros	COM	2005	3.01332	11.0451	88.9975	100.043	35.7574	54.5346	5.6652			31.1624	42.313		8.65	11.051	9.85	33.14	22.593	28.049	4.06967	7.99531	2.04084	28.0169
Comoros	COM	2006	3.37436	11.0451	88.9976	100.043	35.7573	54.5343	-1.75445			32.3034	42.677		8.702	10.854	9.802	33.465	22.714	28.241	4.13838	8.02932	2.01705	28.1143
Comoros	COM	2007	4.46617	10.7241	87.594	98.3181	33.1562	54.2988	0.8036	4.39438		33.4614	43.045		8.81	10.729	9.813	33.775	22.831	28.422	4.19791	8.04438	1.99306	28.2493
Comoros	COM	2008	1.70078	10.9342	89.5928	100.527	36.2185	55.7844	3.96461		4.42265	34.8827	43.412		8.863	10.532	9.755	33.903	22.813	28.442	4.22973	8.00358	1.98685	28.4193
Comoros	COM	2009	4.36235	11.4768	89.8056	101.282	37.8969	53.5202	3.2406	6.19504		36.1336	43.776		8.849	10.252	9.615	33.968	22.738	28.402	4.22823	7.89962	1.98865	28.6218
Comoros	COM	2010	3.35476	11.1388	90.9585	102.097	39.5501	53.1899	3.77788	7.90405		37.4847	44.139		8.839	9.983	9.476	34.109	22.759	28.45	4.2054	7.76134	1.98791	28.8541
Comoros	COM	2011	1.84266	10.66	93.4067	104.067	40.0009	53.602	4.14356	9.48193	2.83045	38.9153	44.502		8.894	9.799	9.407	33.951	22.448	28.187	4.17727	7.62317	1.99872	29.1137
Comoros	COM	2012	6.31474	10.0436	96.7235	106.767	40.8104	54.0416	3.16836	10.5361	2.74784	40.2357	44.867		9.012	9.692	9.404	33.899	22.338	28.085	4.15578	7.50877	2.0115	29.398
Comoros	COM	2013	-4.29487	9.32677	95.4636	104.79	39.2433	53.0564	4.46616	9.13248	2.38276	41.6517	45.25		9.016	9.475	9.284	33.776	22.075	27.895	4.16372	7.47716	2.11385	29.7043
Comoros	COM	2014	7.54755	10.2752	94.4047	104.68	39.2358	53.7802	2.10667	9.59272	2.74473	42.9623	45.653	81.198	9.195	9.472	9.358	33.552	21.623	27.584	4.21207	7.54567	2.17541	30.0303
Comoros	COM	2015	-0.117174	10.5919	93.3026	103.895	37.805	54.8995	1.14747		2.54506	43.9154	47.338		9.357	9.423	9.395	31.662	21.079	26.39	4.28516	7.66244	2.11093	30.3732
Comoros	COM	2016	0.797517	10.6149	92.6115	103.226	37.1329	54.1737	3.3204			45.3001	49.02		9.586	9.431	9.497	29.901	20.619	25.286	4.36446	7.78718	2.05112	30.7305
Comoros	COM	2017	-0.237362	10.8238	92.1045	102.928	40.1644	54.1994	3.8157	18.819		46.9492	50.646		9.591	9.181	9.357	28.32	20.306	24.326	4.4121	7.83533	1.99258	31.0997
Comoros	COM	2018	2.15155	10.2297	92.0803	102.31	42.9962	52.6504	3.6426			48.5979	52.227		9.587	8.915	9.204	26.898	20.139	23.511	4.43234	7.82195	1.95274	31.4074
Comoros	COM	2019	3.58214	10.0949	93.8915	103.986	42.2681	51.8875	1.7607			49.9802	53.806		9.618	8.693	9.093	25.489	19.969	22.71	4.45792	7.82381	1.92386	31.7288
Comoros	COM	2020	0.786642	10.5608	100.024	110.585	33.7299	51.4464	-0.195577		2.37805	49.2327	54.958		11.543	9.682	10.485	24.307	19.929	22.093	4.46773	7.80181	1.96199	32.0638
Comoros	COM	2021	-0.00441794	10.1267	98.6048	108.731	42.0677	51.1018	2.00019		2.27485	50.0919	56.706	78.324	10.851	8.995	9.798	22.805	19.581	21.168	4.45565	7.74353	1.97632	32.4124
Comoros	COM	2022	12.532	9.60869	101.551	111.16	50.3888	51.1983	2.60301		2.43164	50.3487	57.02		9.735	8.252	8.884	22.815	19.444	21.099	4.45529	7.70475	1.93838	32.7746
Comoros	COM	2023	8.37374	9.44262	103.796	113.239	45.6838	50.5782	2.99522		2.34147	50.633	57.007		9.676	8.2	8.829	22.858	19.441	21.116	4.4729	7.69522	1.92327	33.1502
Comoros	COM	2024	5.05193	9.18264	103.628	112.811	44.3732	50.0703	3.3381			51.1591	56.999		9.657	8.185	8.814	23.016	19.522	21.233	4.47216	7.65697	1.89183	33.5392
Comoros	COM	2025										51.6476	57.387		9.465	8.223	8.753	23.173	19.603	21.349
Congo, Dem. Rep.	COD	2005	21.3168	7.96899	79.6023	87.5713	51.0277	44.6161	6.13515			26.0923	73.071	82.075	3.793	6.382	4.934	23.291	13.623	18.459	3.03606	5.94296	3.07173	37.4019
Congo, Dem. Rep.	COD	2006	13.0527	10.0443	76.7938	86.8381	44.7667	44.9516	5.10894	4.20873		26.5808	72.178		4.186	7.012	5.436	23.809	14.133	18.973	3.05146	5.97779	3.08285	37.8025
Congo, Dem. Rep.	COD	2007	16.9451	10.7508	75.2094	85.9602	72.9983	43.5982	8.52993	4.20303		27.0918	71.267		4.583	7.648	5.944	24.303	14.632	19.469	3.06699	6.0176	3.02532	38.2018
Congo, Dem. Rep.	COD	2008	17.3014	11.4933	74.2901	85.7834	72.9527	44.4684	7.40172	5.27933		27.4131	70.339		4.977	8.277	6.449	24.595	14.89	19.744	3.08287	6.05936	3.01581	38.5997
Congo, Dem. Rep.	COD	2009	2.8	10.604	80.3829	90.9869	63.086	42.0586	0.565482	6.26155		27.5002	69.392		5.401	8.958	6.994	25.05	15.247	20.15	3.09858	6.09801	3.09098	38.9963
Congo, Dem. Rep.	COD	2010	7.1	9.19096	74.3896	83.5805	80.9975	37.5993	7.84301		1.52498	27.9594	68.427		5.791	9.58	7.496	25.422	15.693	20.559	3.11379	6.12658	3.18752	39.3914
Congo, Dem. Rep.	COD	2011	15.3165	11.4925	69.2575	80.75	83.4134	40.2617	7.59332	7.55884		28.4611	67.445		6.183	10.207	8.004	25.795	16.146	20.972	3.12755	6.14609	3.28017	39.785
Congo, Dem. Rep.	COD	2012	9.72183	11.4938	68.9771	80.4709	66.7057	39.5488	8.66859	7.63979		28.9028	66.449	63.708	6.532	10.759	8.456	26.092	16.625	21.36	3.13829	6.16458	3.3386	40.177
Congo, Dem. Rep.	COD	2013	0.808223	14.231	61.9512	76.1821	72.5558	40.9779	9.62449	6.3728	2.06221	29.6801	66.177		6.471	10.606	8.376	26.075	16.534	21.307	3.1417	6.17203	3.40171	40.5675
Congo, Dem. Rep.	COD	2014	1.24304	15.4282	60.7974	76.2256	74.1132	41.4083	7.30228		1.95143	30.5802	65.912		6.394	10.428	8.275	25.924	16.346	21.138	3.1366	6.16295	3.39069	40.9564
Congo, Dem. Rep.	COD	2015	0.744199	17.295	60.1957	77.4907	57.7539	42.3571	6.35974		2.17044	31.3232	65.639		6.354	10.314	8.22	25.794	16.182	20.991	3.12698	6.14539	3.30224	41.3436
Congo, Dem. Rep.	COD	2016	2.88585	18.0122	62.0213	80.0334	68.0083	44.4536	0.393833	5.90037	2.11869	31.3116	65.326	67.817	6.399	10.353	8.277	27.425	18.825	23.13	3.11531	6.11217	3.54101	41.729
Congo, Dem. Rep.	COD	2017		15.0697	61.1196	76.1893	65.9185	45.174	4.24121		1.45495	31.3904	65.016		6.444	10.396	8.334	29.036	21.362	25.205	3.10422	6.078	3.65685	42.1128
Congo, Dem. Rep.	COD	2018		15.4586	59.4949	74.9536	72.5592	46.4519	6.07169			31.8331	64.75		6.421	10.315	8.301	30.536	23.67	27.109	3.09688	6.06806	3.34727	42.4947
Congo, Dem. Rep.	COD	2019		18.1549	63.5254	81.6803	60.9144	49.413	0.555384			32.3254	64.494		6.354	10.159	8.208	31.974	25.805	28.895	3.09329	6.07374	3.16953	42.8747
Congo, Dem. Rep.	COD	2020		16.645	62.8437	79.4886	61.0285	48.5388	0.775428	6.37988	2.62264	30.9139	63.601	61.018	7.567	11.696	9.595	33.985	28.749	31.372	3.08608	6.06763	3.22098	43.2529
Congo, Dem. Rep.	COD	2021		15.3959	51.7709	67.1667	75.3871	42.7734	6.42961		2.66048	30.7375	63.838		7.235	11.239	9.179	33.745	28.591	31.174	3.07363	6.04663	3.23791	43.6291
Congo, Dem. Rep.	COD	2022		17.2338	50.2619	67.4957	85.8222	43.7586	9.31117		2.84467	31.5861	64.598		6.301	10.036	8.1	33.059	27.797	30.435	3.06605	6.03293	3.2234	44.0033
Congo, Dem. Rep.	COD	2023		16.8866	51.6673	68.554	86.7401	45.9224	8.53349			32.4982	64.659		6.239	9.95	8.011	32.78	27.587	30.191	3.06836	6.03492	3.25964	44.3755
Congo, Dem. Rep.	COD	2024		18.1317	52.3692	70.5009	100.554	46.5725	6.12676			33.095	64.693		6.196	9.889	7.951	32.772	27.482	30.136	3.07558	6.04341	3.24258	44.7456
Congo, Dem. Rep.	COD	2025										33.4535	64.587		6.111	9.766	7.848	32.765	27.382	30.083
Congo, Rep.	COG	2005	3.09449	12.5058	31.0989	43.6047	119.553	29.4011	7.75576		1.68102	36.6196	68.868	76.913	38.982	41.126	40.023	33.226	26.561	29.871	2.98408	5.34133	3.6038	61.3103
Congo, Rep.	COG	2006	6.53784	12.7495	29.6395	42.389	125.601	30.4642	7.98624			37.4079	68.804		38.725	40.958	39.804	33.094	26.447	29.752	2.94124	5.23432	3.74399	61.6238
Congo, Rep.	COG	2007	2.65465	16.801	33.7612	50.5621	148.587	35.7365	-6.61399			38.117	68.707		39.402	41.858	40.582	33.316	26.705	29.996	2.89709	5.13384	3.65925	61.8503
Congo, Rep.	COG	2008	4.95875	12.141	32.0902	44.2312	133.108	29.2296	6.30638			38.3352	68.707		39.559	42.09	40.773	33.256	26.659	29.946	2.85076	5.04707	3.28885	62.0355
Congo, Rep.	COG	2009	4.415	13.4118	38.8856	52.2974	135.552	33.8305	11.6373	5.87968		39.157	68.686	36.48	39.475	42.062	40.713	33.114	26.529	29.814	2.79992	4.94047	3.99594	62.2172
Congo, Rep.	COG	2010	0.391525	10.5718	29.2466	39.8184	124.065	25.4332	9.93127		5.68673	39.4662	68.67		38.676	41.218	39.891	32.559	26.165	29.356	2.7527	4.84468	4.14243	62.3923
Congo, Rep.	COG	2011	1.75959	12.835	27.6914	40.5264	124.592	25.5372	2.20592	7.95888	2.64653	40.003	68.715		38.955	41.524	40.186	32.293	26.1	29.19	2.71649	4.79575	3.25059	62.5598
Congo, Rep.	COG	2012	5.01019	13.7572	23.7064	37.4636	97.4444	26.9857	9.94715	9.09545	2.73923	40.6099	68.816		39.081	41.605	40.298	31.994	25.814	28.897	2.6925	4.778	2.79641	62.7187
Congo, Rep.	COG	2013	4.63162	14.073	25.9967	40.0697	93.0029	28.5857	-0.712434	8.56632	5.01388	41.039	68.902		39.684	42.23	40.919	31.988	26.011	28.991	2.67643	4.78026	2.43093	62.8683
Congo, Rep.	COG	2014	0.91214	16.7342	28.3515	45.0857	104.198	31.9011	6.64607		3.18257	41.7021	68.998		39.444	41.898	40.641	31.635	25.576	28.595	2.66463	4.78564	2.41609	63.0075
Congo, Rep.	COG	2015	3.1691	19.3063	39.518	58.8243	117.321	39.1612	0.415193		3.13883	42.2744	69.057		39.998	42.483	41.214	31.592	25.466	28.518	2.6611	4.80066	2.41639	63.1356
Congo, Rep.	COG	2016	3.19056	21.3085	45.5474	66.8559	122.26	47.2059	-8.68524		4.87114	42.876	69.059		40.457	43.004	41.705	31.735	25.598	28.654	2.66785	4.82617	2.4217	63.2515
Congo, Rep.	COG	2017	0.450064	18.0866	34.7106	52.7972	94.6171	41.6484	-5.59477	12.1462	4.17237	42.8773	69.044		41.184	43.826	42.478	31.985	25.833	28.896	2.68202	4.85609	2.43024	63.3545
Congo, Rep.	COG	2018	1.15278	13.5041	33.1309	46.635	100.583	34.7073	-2.30432		2.77167	42.9892	69.023		41.35	44.02	42.657	32.114	25.975	29.032	2.70147	4.88979	2.43884	63.4435
Congo, Rep.	COG	2019	2.20607	13.2409	40.0371	53.278	91.5758	39.0356	1.12447		3.24716	43.5146	68.996		40.771	43.378	42.045	32.023	25.879	28.938	2.72775	4.92994	2.40634	63.5176
Congo, Rep.	COG	2020	1.79537	17.4784	46.6586	64.137	69.3066	49.9693	-6.26777		4.22209	42.5044	65.801		45.695	47.749	46.705	33.542	27.155	30.335	2.75917	4.97377	2.39478	63.5761
Congo, Rep.	COG	2021	1.71564	14.8705	43.0256	57.8962	85.5462	42.6029	1.01507		3.31282	42.5345	66.407		43.492	45.914	44.676	33.087	26.824	29.941	2.79756	5.02626	2.39414	63.6179
Congo, Rep.	COG	2022	3.04344	11.8368	37.721	49.5578	98.1613	37.3148	1.47536		2.72738	42.7869	68.792		40.144	42.212	41.175	32.289	26.014	29.137	2.84986	5.09871	2.39665	63.6422
Congo, Rep.	COG	2023	4.30175	13.0993	44.1083	57.2076	96.2104	40.4265	1.90686	10.3812	3.34005	43.2654	68.764		39.725	41.711	40.717	32.346	26.046	29.181	2.91461	5.18598	2.41919	63.6627
Congo, Rep.	COG	2024	3.09144	13.3811	47.4031	60.7842	93.1881	45.0184	2.57967			43.7175	68.742		39.608	41.558	40.581	32.455	26.152	29.289	2.98559	5.27784	2.39829	63.8866
Congo, Rep.	COG	2025										44.1675	68.721		39.447	41.556	40.501	32.564	26.258	29.396
Costa Rica	CRI	2005	13.7983	13.5129	69.8166	83.3295	89.2227	57.7916	3.97667			63.4914	65.594	79.999	22.19	11.629	15.519	28.266	9.354	18.655	6.36376	9.65232	1.44571	64.8999
Costa Rica	CRI	2006	11.4706	13.165	68.9358	82.1008	89.8146	58.1778	7.3267		4.61614	64.6285	64.974	81.298	19.89	10.955	14.269	27.057	10.172	18.468	6.54827	9.86419	1.40053	66.1703
Costa Rica	CRI	2007	9.35724	12.8053	69.2003	82.0056	86.4566	57.9759	8.21513		4.63451	64.9488	65.963	80.983	15.291	8.561	11.067	26.555	8.712	17.472	6.74111	10.091	1.35398	67.4686
Costa Rica	CRI	2008	13.4245	13.5775	70.6004	84.1779	86.4015	59.4254	4.73817		4.88697	66.4472	65.391	79.981	13.466	9.879	11.247	25.407	9.538	17.325	6.93915	10.332	1.35616	68.7926
Costa Rica	CRI	2009	7.8427	15.7481	66.2937	82.0418	69.7593	61.0598	-0.873456		6.0103	66.9467	65.336	79.478	22.221	16.012	18.365	26.878	12.665	19.637	7.14634	10.5914	1.3364	70.1398
Costa Rica	CRI	2010	5.66276	16.6207	65.3986	82.0193	67.5121	61.9078	5.36034		6.56574	66.7063	64.059	75.15	21.052	15.189	17.378	24.608	13.773	19.087	7.37013	10.8738	1.24058	71.5081
Costa Rica	CRI	2011	4.878	16.9618	66.6842	83.646	68.6391	63.1821	4.40316	44.6712	6.37989	67.207	65.226	74.622	29.089	17.677	22.037	27.049	15.463	21.144	7.61268	11.1876	1.17549	72.8427
Costa Rica	CRI	2012	4.49545	16.79	67.1017	83.8917	67.0485	64.2861	4.88259	46.6885	6.5824	68.8555	68.84	78.479	27.56	18.988	22.372	22.677	12.662	17.571	7.87157	11.5342	1.16677	73.3895
Costa Rica	CRI	2013	5.23134	17.1302	66.1625	83.2927	64.0664	65.5704	2.49477	47.5057	6.6874	70.9554	68.417	80.228	25.595	18.713	21.559	23.487	12.661	17.966	8.15266	11.9149	1.11329	73.9432
Costa Rica	CRI	2014	4.5192	17.0113	66.231	83.2423	65.1912	66.3984	3.54211	50.3343	6.67952	68.2564	69.233	78.805	29.744	20.657	24.23	23.123	13.68	18.306	8.45128	12.3225	1.075	74.4867
Costa Rica	CRI	2015	0.801982	16.9602	64.9483	81.9085	60.7536	67.298	3.65208	51.2846	6.8735	65.7465	67.898	78.935	26.651	19.467	22.363	24.413	13.113	18.648	8.75897	12.7475	1.06247	75.0198
Costa Rica	CRI	2016	-0.0174789	16.7087	64.0607	80.7693	62.1785	67.4552	4.20432	51.6516	6.89396	66.3131	65.027	75.476	28.047	17.725	21.65	25.459	15.635	20.447	9.07488	13.1894	1.01105	75.5423
Costa Rica	CRI	2017	1.62591	16.3582	65.1235	81.4817	65.072	68.343	4.1577	54.4492	7.06981	66.7625	65.374	75.64	25.756	17.682	20.736	24.725	15.386	19.96	9.40003	13.6546	0.944346	76.0539
Costa Rica	CRI	2018	2.22111	16.1957	64.9027	81.0985	66.9453	68.6706	2.6159	52.6141	6.76992	65.2996	67.866	75.777	31.659	20.975	25.071	23.295	14.246	18.678	9.74222	14.158	0.904495	76.5544
Costa Rica	CRI	2019	2.09605	16.7512	64.2946	81.0458	65.7605	69.205	2.41751	55.0203	6.73808	66.5997	70.151	79.726	36.071	27.686	31.194	21.033	14.269	17.582	10.1055	14.6956	0.838278	77.0436
Costa Rica	CRI	2020	0.724911	17.7047	62.4591	80.1638	60.1399	68.2324	-4.27335		6.62898	65.3792	66.859	77.809	49.464	33.372	40.11	23.789	16.258	19.946	10.4851	15.2447	0.692995	77.5212
Costa Rica	CRI	2021	1.72648	16.5308	63.3163	79.8471	70.7816	67.0794	7.93576		6.24842	67.2139	68.38	77.789	46.834	33.123	39.201	22.314	15.802	18.991	10.8654	15.7841	0.508565	77.9869
Costa Rica	CRI	2022	8.27477	15.3959	64.3239	79.7198	82.2275	67.2831	4.55149			67.6246	68.588	74.54	36.879	26.149	30.718	21.145	13.376	17.181	11.2621	16.3459	0.429453	78.4406
Costa Rica	CRI	2023	0.525194	14.8735	64.5106	79.3841	72.472	67.9931	5.11192			66.3827	63.927	72.995	28.515	21.211	24.308	23.491	18.38	20.883	11.7188	16.9961	0.466464	78.8819
Costa Rica	CRI	2024	-0.412853	14.6785	63.9199	78.5984	71.331	68.7833	4.32122			69.6192	65.035	72.344	22.743	18.952	20.481	21.25	15.433	18.282	12.2252	17.7239	0.476483	79.3108
Costa Rica	CRI	2025										70.0321	65.321		22.157	18.454	19.949	21.35	15.466	18.348
Cote d'Ivoire	CIV	2005	3.88583			85.2208	62.8209	38.8168	0.996066		2.91944	39.5789	66.961		7.708	8.297	8.035	29.695	14.547	22.139	2.28439	4.44548	2.38749	45.0823
Cote d'Ivoire	CIV	2006	2.46719			83.8277	63.6904	37.9448	2.81558		2.82	39.8148	67.158		7.805	8.386	8.124	29.516	14.773	22.155	2.25032	4.37807	2.3556	45.5035
Cote d'Ivoire	CIV	2007	1.89201			86.7228	61.4309	38.7673	1.10143	7.93707	3.01614	40.1034	67.352		8.126	8.736	8.457	29.422	15.122	22.276	2.2156	4.30787	2.32712	45.9303
Cote d'Ivoire	CIV	2008	6.30853			81.7333	61.9406	37.7795	4.78267	7.48366	3.09853	40.3897	67.55		8.305	8.937	8.642	29.311	15.525	22.429	2.21728	4.26757	2.27478	46.362
Cote d'Ivoire	CIV	2009	1.0195			81.1039	66.6729	38.6654	3.60332	7.18858	3.17394	40.8158	67.759		8.565	9.245	8.921	29.258	15.897	22.609	2.25772	4.26872	2.22245	46.798
Cote d'Ivoire	CIV	2010	1.22646			78.7927	67.4729	37.8322	6.84805	6.53099	3.24651	41.1991	67.975		8.7	9.413	9.067	29.061	16.169	22.663	2.306	4.29487	2.20359	47.2374
Cote d'Ivoire	CIV	2011	4.91243			77.5594	64.7159	34.0131	-5.37045	2.92102	2.86576	41.3486	68.2		9.273	10.083	9.682	29.087	17.108	23.154	2.36425	4.34982	2.17266	47.6798
Cote d'Ivoire	CIV	2012	1.30451			79.8853	70.3011	39.6867	7.62041		3.43447	42.2156	68.436	76.357	9.47	10.319	9.891	28.533	16.866	22.756	2.43566	4.43776	2.08872	48.1243
Cote d'Ivoire	CIV	2013	2.58117			77.1221	58.3527	38.8134	10.7602	7.35427	3.4586	42.9678	68.343	83.308	7.367	5.221	6.27	30.575	15.116	22.898	2.52521	4.56454	1.99428	48.5702
Cote d'Ivoire	CIV	2014	0.448682			74.746	53.6804	37.3151	9.372	7.73898	3.31417	42.0354	68.224		5.742	3.774	4.701	32.894	14.815	23.856	2.55425	4.60893	2.42494	49.0173
Cote d'Ivoire	CIV	2015	1.2515	9.34788	65.269	74.6169	52.7154	54.1326	7.19495	8.46433	3.49413	40.9007	68.077		4.397	2.534	3.376	35.224	14.55	24.805	2.51995	4.56045	2.88906	49.4695
Cote d'Ivoire	CIV	2016	0.723178	9.8652	64.6223	74.4875	47.5663	54.4936	7.17276	8.89558	3.93593	39.7359	67.933	64.941	3.045	1.273	2.04	37.648	14.241	25.759	2.4967	4.52668	2.90077	49.93
Cote d'Ivoire	CIV	2017	0.685881	10.2684	66.5789	76.8473	48.6596	55.75	7.41076	9.52489	3.73654	41.1703	67.365	42.014	6.308	4.457	5.257	36.684	14.626	25.4	2.48396	4.50735	2.82237	50.3977
Cote d'Ivoire	CIV	2018	0.401298	10.0473	68.349	78.3963	46.04	55.6186	4.84315		3.21165	42.3286	66.784		5.648	3.919	4.667	34.484	13.44	23.655	2.48161	4.5009	2.69697	50.8718
Cote d'Ivoire	CIV	2019	0.790856	10.8276	66.522	77.3497	44.6604	54.9975	6.72137	10.3257	3.41307	43.6095	66.19	76.378	4.938	3.355	4.043	32.309	12.2	21.917	2.48842	4.50689	2.61917	51.3515
Cote d'Ivoire	CIV	2020	2.41253	11.3216	66.8912	78.2128	41.9426	55.5728	0.699729	10.2664	3.78674	40.9517	66.219		5.669	3.935	4.687	30.3	12.863	21.265	2.49608	4.51181	2.5302	51.8358
Cote d'Ivoire	CIV	2021	4.1592	9.96266	66.9835	76.9462	45.114	54.1	7.06333	10.7726	3.32719	39.3823	67.418		5.421	4.234	4.753	27.651	13.144	20.125	2.50752	4.51703	2.47399	52.3183
Cote d'Ivoire	CIV	2022	5.23353	9.46904	67.3773	76.8464	52.8664	52.9656	6.39988	11.1135	3.51197	38.447	68.218	73.752	4.775	3.943	4.304	25.021	13.097	18.834	2.53282	4.53874	2.51623	52.8493
Cote d'Ivoire	CIV	2023	4.36972	9.26221	70.1397	79.4019	48.817	52.2715	6.6	11.5724	3.42617	39.1304	68.236		4.703	3.886	4.243	24.974	13.116	18.829	2.56824	4.57346	2.50385	53.4075
Cote d'Ivoire	CIV	2024	3.45053	9.29866	69.0401	78.3387	51.264	51.8581	6.01953			39.745	68.256		4.7	3.892	4.249	25.163	13.207	18.98	2.60897	4.61604	2.43618	53.9733
Cote d'Ivoire	CIV	2025										40.302	68.236		4.497	3.626	4.011	25.349	13.295	19.131
Croatia	HRV	2005	3.31718	19.9131	62.6946	82.6077	81.4923	56.6357	4.32708	47.2947		54.0716	64.62	71.618	35.234	30.567	32.541	16.04	17.37	16.719	17.4721	26.2014	0.128733	55.5307
Croatia	HRV	2006	3.18983	20.033	60.3008	80.3339	83.5171	56.6199	5.06908	48.5975		56.4085	64.101	71.53	31.21	27.497	29.1	14.478	13.898	14.182	17.6497	26.4707	0.0235231	55.4686
Croatia	HRV	2007	2.89928	20.701	59.4769	80.1779	83.2622	57.7652	5.04928	50.5306	3.96898	57.0029	65.592	75.811	29.285	22.111	25.123	13.347	12.405	12.866	17.8091	26.7164	-0.0218527	55.4077
Croatia	HRV	2008	6.07697	20.5408	60.039	80.5798	82.0791	57.7892	1.97287	52.3515	4.27839	56.3295	65.768	75.474	28.283	20.627	23.678	12.013	11.249	11.622	17.93	26.9092	-0.0118795	55.3531
Croatia	HRV	2009	2.37853	22.3271	58.7975	81.1246	69.7016	58.7459	-6.81231	51.9583	4.36217	57.6668	65.617	75.497	27.442	23.706	25.213	13.491	13.512	13.502	17.9445	26.9076	-0.105028	55.3097
Croatia	HRV	2010	1.03056	22.2934	58.9795	81.2729	72.6467	59.8362	-1.33605	57.0686	4.20651	58.294	65.133	74.702	33.569	31.476	32.355	14.126	17.141	15.666	17.8776	26.7512	-0.226821	55.2825
Croatia	HRV	2011	2.27273	22.7567	59.9232	82.6799	77.784	60.194	-0.110907	59.3389	4.10584	57.4604	64.178	72.422	36.102	37.051	36.666	14.607	17.759	16.218	17.9482	26.8244	-0.345264	55.2774
Croatia	HRV	2012	3.41207	22.7098	60.8659	83.5756	79.0075	59.8205	-2.23743	62.0257		60.6075	63.928	73.213	42.304	42.657	42.512	15.171	18.062	16.649	18.2005	27.2286	-0.474278	55.3043
Croatia	HRV	2013	2.21658	22.575	60.6805	83.2555	80.9188	59.3784	-0.133646	66.7111	4.50128	62.3244	63.714	72.628	51.021	50.129	50.488	18.475	20.599	19.561	18.4766	27.6953	-0.622679	55.3659
Croatia	HRV	2014	-0.215196	23.0871	59.2367	82.3237	85.2166	59.5271	-0.557693	68.6393		63.7527	66.021	74.659	46.61	45.063	45.703	16.224	21.401	18.871	18.8122	28.2946	-0.766382	55.4592
Croatia	HRV	2015	-0.464499	22.4561	57.8551	80.3112	90.6523	59.2984	2.31999	68.4414		64.2269	66.932	73.409	43.555	41.439	42.31	15.379	20.404	17.952	19.2311	29.0736	-1.1941	55.5813
Croatia	HRV	2016	-1.125	21.9612	57.0408	79.0019	92.1392	59.2392	3.46646	69.589		65.8494	65.61	72.016	31.034	30.886	30.949	14.432	18.785	16.664	19.6581	29.8921	-1.08635	55.7294
Croatia	HRV	2017	1.12937	21.7967	56.7759	78.5726	97.2445	59.6727	3.28396	71.3776	3.87207	66.9148	66.376	72.515	27.21	27.578	27.425	15.043	15.466	15.26	20.1354	30.8382	-1.60676	55.901
Croatia	HRV	2018	1.50013	21.6739	56.699	78.3729	99.0849	59.5122	2.91108	72.8625	3.92433	66.5358	66.285	71.772	29.229	19.436	23.509	13.798	12.887	13.33	20.6683	31.9127	-1.31087	56.0932
Croatia	HRV	2019	0.77182	21.6962	56.7483	78.4445	101.395	59.1673	3.10153	74.0501	3.94556	66.2816	66.543	71.458	18.813	15.315	16.71	11.95	11.981	11.966	21.1822	32.9516	-0.992303	56.3032
Croatia	HRV	2020	0.154811	24.8876	58.5554	83.443	89.5481	59.5396	-8.31086	74.738	4.40855	65.6982	67.301	72.096	23.94	18.69	20.673	11.928	12.175	12.055	21.6662	33.9159	-0.894864	56.5285
Croatia	HRV	2021	2.55451	23.0732	57.8885	80.9618	102.329	59.0487	12.6322	78.0068	4.09166	64.7534	69.048	72.158	26.329	18.342	21.542	13.285	11.818	12.53	22.1007	34.7936	-0.904001	56.7684
Croatia	HRV	2022	10.7806	21.1187	59.0402	80.1588	125.411	59.8155	7.29445	80.7627		66.4528	70.004	73.014	22.08	14.702	17.744	11.228	11.611	11.425	22.4847	35.569	-0.603522	56.9978
Croatia	HRV	2023	7.94128	20.9015	56.5756	77.477	107.278	59.8264	3.76165	81.1775		67.8972	69.881	73.605	21.83	17.073	18.91	9.665	10.072	9.874	22.8154	36.1884	0.104856	57.2432
Croatia	HRV	2024	2.972	23.04	57.1811	80.221	104.912	60.8374	3.82689			68.8521	70.331	74.674	17.877	15.552	16.479	7.62	8.412	8.027	23.1878	36.871	0.168628	57.5159
Croatia	HRV	2025										69.3106	70.42		17.768	15.617	16.474	7.677	8.486	8.092
Cuba	CUB	2005		33.6484	52.9021	86.5505	39.3614	72.9509	11.2017	60.1151	10.5578	60.6374	61.632		3.984	4.358	4.22	20.71	8.78	14.583	11.1549	16.0517	0.211526	76.0033
Cuba	CUB	2006		32.234	55.7989	88.0329	37.188	73.2716	12.0659	84.7447	9.05717	61.8454	61.983		4.051	4.286	4.196	19.189	8.362	13.63	11.4456	16.4333	0.141927	76.1122
Cuba	CUB	2007		35.4098	51.702	87.1118	37.9676	72.4384	7.26214	105.017	11.8682	63.227	62.291		3.429	4.322	3.967	17.488	8.19	12.713	11.7415	16.8343	0.0773027	76.2357
Cuba	CUB	2008		39.8807	49.0566	88.9373	44.9172	72.3231	4.11683	117.163	14.0591	63.3422	62.6		3.554	3.301	3.403	16.85	7.562	12.077	12.0493	17.2718	0.0397714	76.3655
Cuba	CUB	2009		38.961	48.096	87.057	32.914	72.4533	1.45131	113.827	13.1249	63.7017	64.164	86.39	3.489	3.497	3.493	16.065	7.629	11.73	12.3471	17.71	0.0261838	76.493
Cuba	CUB	2010		34.7594	50.3187	85.078	40.2919	72.4692	2.39035	93.5447	12.8373	64.3168	63.667	86.23	5.569	6.338	6.026	18.032	8.817	13.3	12.6388	18.1488	0.0238136	76.6099
Cuba	CUB	2011		35.4211	52.8613	88.2824	46.9604	73.0062	2.8023	78.4792		63.1704	64.033		7.231	7.964	7.664	19.22	9.883	14.43	12.9409	18.6089	0.0368335	76.7077
Cuba	CUB	2012		31.9151	54.3539	86.269	45.8662	71.6575	3.0149	61.352	11.5517	61.552	64.453	81.782	7.503	9.109	8.446	19.948	10.633	15.169	13.2713	19.1195	0.0141917	76.7777
Cuba	CUB	2013		32.4467	54.2827	86.7294	44.3239	71.7698	2.7476	47.9938	10.6717	64.1803	64.917		7.414	8.534	8.07	20.245	10.876	15.436	13.6116	19.6486	-0.044316	76.8164
Cuba	CUB	2014		32.4067	55.0882	87.4949	39.2742	72.8848	1.04758	40.8057	9.60746	64.2132	65.31		6.559	6.621	6.596	19.576	9.775	14.542	13.9191	20.1208	-0.109742	76.8442
Cuba	CUB	2015		32.2063	55.724	87.9303	31.6138	72.7585	4.43833	36.751	8.96336	64.5962	65.711		5.465	6.325	5.966	19.014	9.294	14.021	14.2021	20.5528	-0.0949433	76.8703
Cuba	CUB	2016		31.8959	55.8482	87.744	27.2691	72.0485	0.512843	35.0524	9.01309	64.8844	65.95		4.617	5.212	4.964	18.359	8.87	13.49	14.4765	20.9697	-0.083875	76.9116
Cuba	CUB	2017		30.8386	55.9842	86.8229	26.2224	70.8171	1.80979	41.1702	8.44414	65.136	66.129		3.495	4.864	4.29	17.316	8.406	12.751	14.7546	21.3929	-0.157977	76.9603
Cuba	CUB	2018		30.045	55.959	86.004	27.0835	70.2144	2.24795	42.3506	8.02498	65.4555	66.251		3.868	4.506	4.237	16.886	8.083	12.381	15.0605	21.8762	-0.184303	77.0156
Cuba	CUB	2019		32.232	54.6663	86.8983	22.8209	70.4058	-0.163087	44.7792	9.047	65.9474	66.268		3.879	4.52	4.249	16.408	8.131	12.173	15.3697	22.3791	-0.216425	77.0728
Cuba	CUB	2020		38.8479	50.6232	89.4711	15.683	73.5096	-10.9494	46.7357	11.5248	66.3211	63.23		4.811	5.434	5.172	17.758	10.133	13.855	15.6396	22.8231	-0.236756	77.108
Cuba	CUB	2021		33.8265	52.5993	86.4258	80.0238	74.9618	1.25449	51.8886	9.38586	66.4435	63.575		4.526	5.191	4.91	16.6	9.498	12.965	15.7446	22.9883	-0.486006	77.0988
Cuba	CUB	2022		32.6936	61.8933	94.5869	93.8608	74.595	1.77465		8.44086	66.7937	64.701		3.911	4.632	4.336	15.925	8.295	12.02	15.8759	23.1944	-0.562151	77.1056
Cuba	CUB	2023		26.7224	81.1394	107.862	120.534	73.2022	-1.92937	49.7286		66.7835	64.331		3.835	4.531	4.247	15.76	8.108	11.845	16.1955	23.7156	-0.361318	77.126
Cuba	CUB	2024		24.8237	90.8849	115.709	124.863	73.3918	-1.06173	43.1041		67.196	63.963		3.86	4.571	4.283	15.432	7.946	11.603	16.5691	24.3173	-0.364987	77.1665
Cuba	CUB	2025										67.5631	63.831		3.819	4.59	4.277	15.325	7.911	11.532
Curacao	CUW	2005	4.11712	16.0738	64.9312	81.005	134.911	77.9973	0.676425												10.2182	15.4488	2.55007	91.1747
Curacao	CUW	2006	3.115	15.9511	67.5211	83.4722	144.556	76.063	1.63593												10.4829	15.7509	2.56811	91.1926
Curacao	CUW	2007	2.99572	16.6639	72.2255	88.8894	146.049	74.9991	2.46996												10.7893	16.1276	1.97486	91.2081
Curacao	CUW	2008	6.87632	16.0137	72.856	88.8697	166.74	76.0627	2.18804												11.1349	16.5728	1.25823	91.2221
Curacao	CUW	2009	1.75332	16.5291	70.2191	86.7482	144.702	74.479	-0.531308												11.5164	17.0813	0.651152	91.2354
Curacao	CUW	2010	2.77944	16.1919	80.0336	96.2255	143.932	77.0304	0.0823066												11.9356	17.6674	1.26551	91.2491
Curacao	CUW	2011	2.33253	15.8117	73.3632	89.1748	172.923	75.4546	0.508458		5.64725										12.3765	18.2744	1.4209	91.2639
Curacao	CUW	2012	3.18399	16.0283	73.4159	89.4441	183.236	75.3964	-0.34895		5.38284										12.7718	18.8363	0.82993	91.2791
Curacao	CUW	2013	1.33232	14.1637	73.1572	87.3227	166.406	72.8966	-0.635697	23.0842	5.11633										13.1308	19.4023	1.13368	91.2939
Curacao	CUW	2014	1.49874	15.6564	71.0493	86.7057	164.36	72.0611	-0.637398		5.95465										13.5172	20.0228	1.34764	91.3082
Curacao	CUW	2015	-0.476542	15.7199	69.2356	84.9556	148.314	71.6405	0.458152		5.95011										13.9267	20.6877	1.31959	91.322
Curacao	CUW	2016	-0.047208	16.067	68.3536	84.4207	139.053	70.6735	-1.06771		6.23495										14.3516	21.376	1.06032	91.3354
Curacao	CUW	2017	1.58559	16.122	73.5343	89.6563	139.812	72.2757	-1.27621		5.91445										14.793	22.0739	0.319536	91.3481
Curacao	CUW	2018	2.58369	14.4783	73.2295	87.7078	155.269	73.5238	-2.10411		5.93873			69.81							14.2532	20.7883	-0.525179	91.3601
Curacao	CUW	2019	2.62221					73.9044	-3.20613		5.81156										14.1401	20.3842	-1.19644	91.3715
Curacao	CUW	2020						75.0893	-18.4385		7.11645			77.61							14.9272	21.7111	-1.25208	91.3821
Curacao	CUW	2021						74.5606	4.18371		6.1816										15.3428	22.3275	-0.991509	91.3919
Curacao	CUW	2022						73.3791	6.906		6.08167										15.7946	23.0189	-0.408112	91.4008
Curacao	CUW	2023						73.3089	4.202		5.30074										16.2819	23.7781	0.86566	91.4081
Curacao	CUW	2024						72.296	5.0269		5.44314										16.7817	24.5742	0.845408	91.4322
Cyprus	CYP	2005	2.56016	16.7525	61.571	78.3234	111.917	66.737	4.85299	34.1022	6.28667	71.2144	70.98	85.823	15.058	12.411	13.541	12.119	11.353	11.713	10.3365	14.8211	1.77958	68.4341
Cyprus	CYP	2006	2.30469	17.1894	61.4317	78.6211	109.806	66.9929	4.71378	34.3019	6.33028	73.0942	71.238	86.282	11.282	8.819	9.872	11.31	10.217	10.727	10.4797	14.924	1.74761	68.2534
Cyprus	CYP	2007	2.37265	16.7547	63.9315	80.6861	111.275	66.0995	5.09823	36.2316	6.28084	73.0955	71.815	86.24	9.228	9.688	9.486	9.672	8.41	8.995	10.6559	15.0762	1.72029	68.0604
Cyprus	CYP	2008	4.66901	17.3629	66.7547	84.1176	112.926	66.3693	3.64699	40.8492	6.72277	72.723	71.533	85.685	9.186	8.006	8.532	11.16	8.367	9.654	10.8584	15.2736	1.69267	67.8666
Cyprus	CYP	2009	0.326277	19.1192	63.6956	82.8148	102.791	69.9768	-2.01508	47.6964	7.20547	74.2486	71.674	85.128	13.674	12.966	13.276	11.271	8.743	9.902	11.0793	15.5095	1.66747	67.6836
Cyprus	CYP	2010	2.43004	18.7471	65.7988	84.5459	108.902	71.6413	2.28267	48.3116	6.5256	75.802	72.297	84.125	16.791	15.074	15.852	13.029	10.55	11.683	11.3183	15.7867	1.64898	67.5229
Cyprus	CYP	2011	3.28945	19.3609	65.7999	85.1608	110.617	73.9856	0.416712	46.5397	6.52042	75.2739	72.292	83.376	20.713	21.488	21.156	14.136	15.072	14.643	11.5525	16.0842	1.64247	67.398
Cyprus	CYP	2012	2.38905	19.1015	66.8683	85.9697	112.344	74.9482	-3.44738	45.8636		76.9169	72.967	83.985	26.136	28.027	27.244	14.175	17.523	15.977	11.7784	16.3987	1.63541	67.301
Cyprus	CYP	2013	-0.399358	18.7336	67.0344	85.768	120.926	76.1139	-6.58748	47.5252	6.46747	79.332	73.379	83.746	36.064	39.647	38.083	16.773	20.322	18.668	12.0175	16.7454	1.5748	67.2102
Cyprus	CYP	2014	-1.35499	17.0728	68.6804	85.7532	130.844	75.8274	-1.77606	53.1044	6.42111	79.0522	74.444	84.098	34.278	36.572	35.516	15.059	18.741	17.008	12.2611	17.1083	1.50114	67.1231
Cyprus	CYP	2015	-2.097	16.6093	67.3098	83.9191	137.276	75.5176	3.41892	60.1012	6.30491	79.7796	74.14	83.91	30.93	34.079	32.539	14.674	15.869	15.301	12.4999	17.4776	1.46213	67.0402
Cyprus	CYP	2016	-1.42917	15.4872	65.5127	80.9999	139.022	74.5691	6.57359	67.1711	6.11811	79.3062	73.809	81.93	31.977	25.859	28.902	17.018	15.101	16.02	12.7307	17.8484	1.43371	66.9626
Cyprus	CYP	2017	0.531766	15.0336	64.9243	79.9579	148.013	74.138	5.75083	75.9408	5.69962	80.425	74.699	81.769	23.236	27.006	25.013	16.038	16.146	16.094	12.9503	18.2099	1.37781	66.8907
Cyprus	CYP	2018	1.43549	14.7113	64.9469	79.6582	147.624	73.4972	6.27166	81.3371		81.1733	75.951	81.874	16.188	25.436	20.654	11.614	14.713	13.21	13.1665	18.5682	1.30393	66.8256
Cyprus	CYP	2019	0.250371	16.0349	63.4628	79.4977	150.506	73.2857	5.8756	88.4853	5.16293	79.1545	76.865	82.879	14.678	19.049	16.856	13.113	14.177	13.659	13.3826	18.9315	1.24612	66.7677
Cyprus	CYP	2020	-0.638423	19.2034	61.5261	80.7295	160.669	74.5572	-3.22063	92.9378	5.56462	77.7572	76.712	82.438	12.343	23.816	18.491	13.456	15.214	14.357	13.6113	19.3233	1.2033	66.718
Cyprus	CYP	2021	2.44609	18.784	56.8824	75.6664	176.828	75.7896	11.3976	96.5378	5.08244	79.2313	77.564	82.435	16.453	17.786	17.173	13.703	13.842	13.774	13.8514	19.7429	1.14998	66.6718
Cyprus	CYP	2022	8.39548	17.9937	57.8326	75.8263	205.754	77.1561	8.27373	98.3046	4.73589	80.47	79.051	82.881	18.607	18.797	18.707	16.252	13.261	14.721	14.0779	20.1434	1.06175	66.6695
Cyprus	CYP	2023	3.54134	18.4416	58.0467	76.4883	190.741	76.2219	3.61946	99.0217		81.4093	79.777	83.119	14.292	17.927	16.22	14.644	12.691	13.644	14.3233	20.5727	1.01677	66.6739
Cyprus	CYP	2024	1.80023	18.4086	57.2763	75.6849	190.403	76.4769	3.94077			81.4578	79.223	82.467	13.389	12.386	12.857	11.32	9.985	10.636	14.6162	21.0876	0.98445	66.6824
Cyprus	CYP	2025										81.5765	79.264		13.055	12.404	12.709	11.321	10.097	10.694
Czechia	CZE	2005	1.8571	20.299	47.7614	68.388	121.191	54.6371	6.37503	49.1181	3.86251	55.229	70.385	72.605	19.079	19.367	19.248	11.927	8.154	9.993	14.0576	19.7347	0.138326	73.6376
Czechia	CZE	2006	2.53399	19.9327	46.974	67.1974	127.051	54.4483	6.62317	49.8811	4.19625	55.5383	70.301	71.624	18.646	16.566	17.447	11.465	7.603	9.485	14.2527	19.9894	0.270796	73.5789
Czechia	CZE	2007	2.85312	19.1356	46.0967	65.4684	129.877	54.3201	5.48883	54.1809	3.85007	55.8697	69.816	68.832	10.967	10.572	10.734	9.31	5.008	7.103	14.4823	20.3286	0.583542	73.5219
Czechia	CZE	2008	6.35866	19.1552	47.4401	66.837	123.905	55.1728	2.61227	57.9172	3.73208	56.3002	69.623	67.391	9.928	9.837	9.874	8.856	4.884	6.818	14.7819	20.8168	0.829413	73.4656
Czechia	CZE	2009	1.01938	20.7176	48.7428	69.6998	113.049	55.7128	-4.79832	61.4116	4.15532	58.3117	70.051	68.406	16.699	16.627	16.656	9.966	7.312	8.605	15.1358	21.432	0.569729	73.4085
Czechia	CZE	2010	1.47273	20.3296	48.5618	70.242	126.756	56.2888	2.71467	64.9328	3.99342	58.9167	70.155	66.683	18.486	18.27	18.356	10.502	7.658	9.044	15.459	22.0407	0.291362	73.3496
Czechia	CZE	2011	1.91722	19.6371	48.8343	69.6442	136.751	55.1143	1.77238	66.7968	4.20788	58.5583	70.531	67.979	17.962	18.152	18.077	9.923	7.572	8.719	15.8988	22.873	0.206748	73.2878
Czechia	CZE	2012	3.28762	19.3133	49.0704	69.6017	145.48	55.1671	-0.770668	66.9288	4.1905	58.8258	71.581	69.842	18.996	19.855	19.508	10.074	8.426	9.23	16.5	24.0034	0.139926	73.2249
Czechia	CZE	2013	1.4383	19.5992	49.2578	69.9646	145.502	54.968	-0.0418124	66.3243	4.02133	59.4582	72.848	71.445	19.447	18.629	18.958	11.074	7.913	9.453	17.0822	25.1239	0.0331699	73.1622
Czechia	CZE	2014	0.343989	19.19	47.9683	68.3636	156.415	54.5981	2.24521	67.396	3.93604	59.212	73.476	75.774	17.101	15.024	15.841	10.249	6.68	8.416	17.6055	26.1605	0.105278	73.0996
Czechia	CZE	2015	0.309365	18.8078	46.8916	67.0246	154.018	54.333	4.95876	67.2304	5.71913	59.049	73.95	75.625	14.434	11.302	12.582	9.775	5.777	7.718	18.0969	27.1605	0.196589	73.037
Czechia	CZE	2016	0.683504	18.7815	46.9343	67.2553	148.547	54.8702	2.58087	67.5056	5.5008	59.0272	74.907	75.68	11.397	9.889	10.488	8.716	5.673	7.149	18.5952	28.1915	0.192048	72.9746
Czechia	CZE	2017	2.45053	18.5098	46.7213	67.2922	147.751	55.6564	5.17357	67.7142	3.75574	59.1393	75.759	76.208	8.745	7.38	7.936	8.441	4.487	6.405	19.0859	29.2279	0.265643	72.9122
Czechia	CZE	2018	2.14949	19.1749	46.8958	68.2795	145.142	57.0227	2.83031	66.7902	4.21541	59.7002	76.431	76.963	7.194	6.368	6.714	7.973	3.632	5.738	19.5316	30.1919	0.334427	72.8499
Czechia	CZE	2019	2.84788	19.2646	46.0418	67.7331	138.155	57.8053	3.56578	66.8802	4.46737	60.0863	76.561	76.243	5.989	5.341	5.615	8.381	3.413	5.824	19.9486	31.1016	0.393789	72.7876
Czechia	CZE	2020	3.1613	21.3199	44.4052	68.5283	128.78	59.5821	-5.30488	67.1844	4.62503	60.1445	76.198	75.505	9.139	7.196	7.936	9.172	4.333	6.682	20.294	31.8571	0.243223	72.7255
Czechia	CZE	2021	3.83984	20.771	43.9413	68.1495	137.378	60.8666	4.02902	69.8369	4.65164	60.6321	76.497	76.013	9.044	7.542	8.134	8.425	4.897	6.61	20.5372	32.3961	-1.81187	72.6811
Czechia	CZE	2022	15.1002	19.4415	44.9263	68.1593	144.011	59.7439	2.84717	70.8146	4.30292	60.4286	76.951	76.958	7.912	5.893	6.72	9.377	5.872	7.58	20.5183	32.295	1.57097	72.6968
Czechia	CZE	2023	10.6613	19.5529	43.7566	66.8675	131.893	59.6976	0.0475803	66.7283		60.5872	77.336	77.179	8.689	8.377	8.507	9.703	4.479	7.034	20.5459	32.2135	1.78239	72.7352
Czechia	CZE	2024	2.43531			67.4443	131.485	60.1721	1.23309			61.8517	77.633	77.387	9.779	8.766	9.2	5.996	3.297	4.617	20.8454	32.6949	0.376553	72.7948
Czechia	CZE	2025										62.3967	77.514		9.65	8.893	9.219	6.048	3.338	4.663
Denmark	DNK	2005	1.81781	24.4356	47.6673	72.4773	89.3988	61.7718	2.35961	80.8125	8.06475	72.9253	79.725	81.318	8.578	8.625	8.603	5.164	3.6	4.366	15.0928	22.8189	0.275482	86.006
Denmark	DNK	2006	1.92422	24.1607	47.321	71.7984	97.4299	61.1393	3.81649	78.5058	7.71624	73.5807	80.475	80.79	7.476	7.884	7.686	3.842	3.45	3.642	15.2482	23.0736	0.328645	86.2501
Denmark	DNK	2007	1.69327	24.2779	47.3699	72.0213	100.048	61.6648	0.987174	78.2433	7.59682	73.5294	80.053	81.413	7.377	7.603	7.495	3.844	4.787	4.326	15.4557	23.4126	0.443466	86.4251
Denmark	DNK	2008	3.41627	24.9864	47.1756	72.4928	104.47	62.4414	-0.417178	74.8606	7.44196	74.039	79.276	79.786	10.334	8.666	9.471	5.124	5.3	5.214	15.7358	23.8789	0.587548	86.5831
Denmark	DNK	2009	1.30471	27.8157	48.2725	76.3644	89.3949	65.6486	-4.97448	73.1106	8.4128	76.6698	78.659	78.607	11.557	15.207	13.441	5.904	7.03	6.48	16.1019	24.5054	0.535079	86.7618
Denmark	DNK	2010	2.31092	27.3361	47.5605	75.384	94.3877	65.7785	1.5829	72.4951	8.55025	77.5904	77.963	78.048	13.135	17.863	15.554	6.204	7.481	6.857	16.5574	25.2977	0.444197	86.8652
Denmark	DNK	2011	2.75868	26.5406	47.8704	74.8582	102.013	65.1652	1.3108	75.93	8.47716	77.5706	77.749	78.681	14.381	18.144	16.306	7.178	7.194	7.186	17.0764	26.2152	0.411738	87.1568
Denmark	DNK	2012	2.39791	26.5003	48.0945	74.9736	104.362	64.8675	-0.0054323	77.7466	7.24571	77.5941	77.169	78.468	14.804	16.704	15.775	7.332	7.36	7.346	17.6035	27.1512	0.376272	87.2336
Denmark	DNK	2013	0.789072	25.9285	47.5494	74.4185	103.613	65.569	1.39267	80.4187	8.46864	77.7652	76.504	77.591	13.327	16.199	14.774	6.362	6.893	6.633	18.0533	27.9389	0.416901	87.5437
Denmark	DNK	2014	0.564021	25.7974	47.1825	73.3959	103.211	65.9893	1.278	81.3144	7.63834	78.1497	76.522	77.057	12.834	15.522	14.196	5.966	6.803	6.394	18.4156	28.5624	0.507053	87.6824
Denmark	DNK	2015	0.452034	25.5464	47.2542	72.9582	105.13	66.2681	2.10441	83.3004		78.084	76.895	77.205	11.135	13.136	12.152	6.929	7.13	7.032	18.7039	29.0522	0.706424	87.7254
Denmark	DNK	2016	0.25	24.9429	46.8126	72.2842	101.453	65.5817	3.07305	82.1715	7.71534	78.6176	77.414	76.799	10.824	13.481	12.147	5.907	7.496	6.72	18.9426	29.4677	0.780393	87.7
Denmark	DNK	2017	1.14713	24.4497	46.4309	71.5669	104.216	65.2651	3.05648	81.322	7.37001	78.9512	77.866	76.902	11.884	12.874	12.384	7.635	7.532	7.582	19.1823	29.9032	0.643351	88.0162
Denmark	DNK	2018	0.813609	24.3811	47.1854	72.3149	108.814	65.157	1.86001	81.1405	7.32747	78.8986	78.196	76.832	9.228	11.785	10.52	7.601	7.761	7.683	19.4404	30.372	0.495839	88.106
Denmark	DNK	2019	0.758132	24.2048	47.0984	72.1043	111.891	65.1563	1.7114	81.6946	7.27588	79.2311	79.043	77.196	9.721	10.354	10.041	7.445	7.987	7.722	19.7144	30.8727	0.358131	88.2096
Denmark	DNK	2020	0.420712	24.68	46.1581	71.5969	104.433	65.9864	-1.78011	82.6643	7.38574	79.0114	78.942	76.925	10.652	12.577	11.634	7.203	7.714	7.464	20.0008	31.402	0.291641	88.2394
Denmark	DNK	2021	1.85305	23.9787	45.2708	69.9481	112.321	66.6399	6.50025	83.9823	6.95916	78.6002	79.527	76.819	10.935	10.674	10.8	7.149	7.075	7.111	20.2481	31.8477	0.433414	88.2616
Denmark	DNK	2022	7.69657	21.7803	43.2526	65.7082	131.996	66.4298	0.443833	84.5866	6.35587	78.8087	80.361	77.127	10.453	10.61	10.533	6.981	6.559	6.766	20.4007	32.0953	0.787502	88.388
Denmark	DNK	2023	3.30518	22.6171	45.7401	67.352	129.625	63.908	0.604588	81.2308		78.7222	80.754	77.806	11.251	11.746	11.499	7.025	7.279	7.155	20.6002	32.4245	0.741186	88.5526
Denmark	DNK	2024	1.3722			66.5545	131.765	63.5496	3.47784			79.3308	82.119	78.622	11.549	12.017	11.786	7.149	6.56	6.848	20.8661	32.8923	0.503861	88.6961
Denmark	DNK	2025										79.5748	82.185		11.399	12.066	11.737	7.155	6.582	6.862
Djibouti	DJI	2005	3.10497							2.15187	8.36589	93.6676	34.678		68.339	66.695	67.305	55.583	49.424	52.488	3.36774	5.78592	1.56648	71.3061
Djibouti	DJI	2006	3.48341							2.4364	8.27878	93.617	34.62		68.726	67.038	67.666	55.461	49.283	52.356	3.4201	5.85007	1.95849	71.0245
Djibouti	DJI	2007	4.96598							2.70821	8.40625	93.5351	34.53		69.139	67.403	68.053	55.376	49.157	52.249	3.47045	5.89806	2.16897	70.8118
Djibouti	DJI	2008	11.9586							2.89696		93.4354	34.439		69.525	67.726	68.403	55.265	49	52.115	3.52765	5.95574	2.06044	70.6794
Djibouti	DJI	2009	1.6755							3.63387		93.509	34.339		70.455	68.652	69.335	55.342	49.06	52.183	3.59243	6.02571	2.08326	70.6383
Djibouti	DJI	2010	3.95008							3.61855	4.49022	93.5282	34.256		71.16	69.32	70.021	55.301	48.994	52.129	3.6667	6.11424	2.03332	70.6487
Djibouti	DJI	2011	5.06871							5.16012		93.4995	34.183		71.668	69.753	70.486	55.129	48.786	51.938	3.74843	6.21519	1.94885	70.6777
Djibouti	DJI	2012	3.73121								6.35128	93.5116	34.107		71.98	70.032	70.783	55.004	48.615	51.791	3.83735	6.32749	1.89939	70.7266
Djibouti	DJI	2013	2.70603	19.656	58.3283	77.9843	347.72	80.5749			4.64783	93.4867	34.027		72.559	70.574	71.343	54.896	48.47	51.664	3.93299	6.44804	1.85261	70.7969
Djibouti	DJI	2014	1.34186	19.0422	60.5084	79.5507	298.565	80.3757	7.19299		4.38408	93.3897	33.941		73.292	71.232	72.035	54.741	48.277	51.491	4.03239	6.56842	1.80056	70.8899
Djibouti	DJI	2015	-0.84739	19.9111	61.5556	81.4668	268.363	80.2865	7.30899		3.59895	93.2724	33.84		73.799	71.65	72.492	54.572	48.052	51.294	4.12369	6.6681	1.73961	71.0069
Djibouti	DJI	2016	2.73841	22.2299	61.3781	83.608	213.072	80.6845	7.12343		3.92226	93.1565	33.722		74.371	72.129	73.014	54.42	47.84	51.112	4.20015	6.73589	1.6852	71.1492
Djibouti	DJI	2017	0.568112	21.7736	62.3649	84.1384	305.968	79.2106	5.45809		3.73345	93.041	33.588	70.785	75.346	73.03	73.951	54.359	47.73	51.027	4.26723	6.78326	1.64286	71.3183
Djibouti	DJI	2018	0.147971	21.3501	63.0219	84.372	300.399	77.519	4.77434		3.75143	92.9161	33.449		76.407	74.024	74.98	54.325	47.648	50.969	4.33378	6.82738	1.60259	71.5153
Djibouti	DJI	2019	3.31925	19.811	65.4111	85.222	320.939	76.9845	5.54508			92.8178	33.319		77.37	74.913	75.906	54.24	47.515	50.86	4.40581	6.88213	1.55766	71.7418
Djibouti	DJI	2020	1.77741	19.8438	71.8801	91.7239	225.745	77.2681	1.20212			92.8082	32.929		84.183	80.324	81.882	54.695	48.033	51.347	4.47507	6.93634	1.50229	71.999
Djibouti	DJI	2021	1.18192	18.1462	75.5535	93.6998	263.478	75.1141	4.40716			92.6276	33.173		81.052	78.229	79.377	54.438	47.753	51.078	4.54106	6.99049	1.44269	72.2883
Djibouti	DJI	2022	5.17981	21.5892	72.7905	94.3797	302.285	76.3885	5.16654			92.5717	33.242		78.002	75.634	76.609	54.078	47.271	50.657	4.62736	7.0809	1.40353	72.611
Djibouti	DJI	2023	1.49507	17.0953	71.0594	88.1547	285.902	77.1153	6.80734			92.4286	33.281		77.589	75.526	76.393	53.844	46.955	50.381	4.73575	7.20934	1.3841	72.8408
Djibouti	DJI	2024	2.07655	17.0953	71.0594	88.1547	241.237	76.0848	6.98048			92.2769	33.336		77.485	75.748	76.494	53.679	46.708	50.175	4.85081	7.35197	1.35922	72.9053
Djibouti	DJI	2025										92.1663	33.344		77.699	76.057	76.766	53.472	46.488	49.961
Dominica	DMA	2005	1.6819					58.8081	0.915286												10.3216	16.4198	0.123742	66.2401
Dominica	DMA	2006	2.20239					58.6514	4.40077												10.4256	16.4409	0.104697	66.5452
Dominica	DMA	2007	3.63222					57.4031	5.35794												10.5676	16.5172	0.0595701	66.8771
Dominica	DMA	2008	6.35992					57.3468	7.12131												10.7285	16.6262	0.010167	67.2323
Dominica	DMA	2009	0.00626357					58.1998	-1.13575												10.9063	16.7754	0.0145224	67.6072
Dominica	DMA	2010	2.99937					58.9739	-0.105611												11.1097	16.9891	-0.00726095	67.9983
Dominica	DMA	2011	1.13123					57.6624	0.0427389												10.9343	16.5683	0.281339	68.3978
Dominica	DMA	2012	1.35677					58.3212	-0.157392		4.52896										10.8019	16.2262	0.0940863	68.7546
Dominica	DMA	2013	-0.0464116					58.0998	0.004504		4.35428										10.1528	15.066	0.860031	69.1197
Dominica	DMA	2014	0.79925					58.2788	2.33522		4.33217										9.54556	13.9955	0.939416	69.4908
Dominica	DMA	2015	-0.843827					59.9303	-3.37338		3.40712										9.64139	14.0393	0.0525632	69.8679
Dominica	DMA	2016	0.141816					58.9928	1.44725		5.12972										10.5644	15.3806	-1.14845	70.2512
Dominica	DMA	2017	0.296253					61.6268	-7.54436		4.71605										11.651	17.012	-1.60754	70.6406
Dominica	DMA	2018	0.989191					55.0281	2.96401		5.1536										11.7874	17.161	-0.471209	71.0363
Dominica	DMA	2019	1.50462					55.1894	3.9481		5.53449										11.9681	17.385	-0.432182	71.4382
Dominica	DMA	2020	1.22026					59.6261	-15.7064		4.6963										12.1853	17.668	-0.453295	71.8466
Dominica	DMA	2021	2.22891					56.5092	5.37984		5.71689										12.4111	17.9695	-0.550549	72.2614
Dominica	DMA	2022	2.8849					58.6517	10.3968		6.04314										12.5856	18.207	-0.561078	72.6826
Dominica	DMA	2023	5.08677					58.319	3.65221		4.69424										12.7439	18.4305	-0.473991	73.1105
Dominica	DMA	2024	2.56922					56.9415	2.05274		5.38572										12.956	18.7317	-0.459632	73.545
Dominican Republic	DOM	2005	4.1902	8.08939	72.1288	80.2182	61.6536	55.768	9.43179			63.6622	59.025	82.835	18.629	10.763	13.492	32.626	20.66	26.571	4.72541	7.61381	1.3109	67.5759
Dominican Republic	DOM	2006	7.57281	8.78702	71.6028	80.3898	63.7665	55.5998	9.17121			63.9174	59.855	82.606	17.772	7.207	10.779	32.483	19.3	25.811	4.79469	7.67008	1.2512	69.3339
Dominican Republic	DOM	2007	6.14357	9.17707	70.8947	80.0718	61.2293	54.9332	7.41841		2.04679	64.5222	59.825	80.548	19.499	8.561	12.326	32.554	19.635	26.015	4.85894	7.71752	1.21804	71.0193
Dominican Republic	DOM	2008	10.6446	10.0631	73.5705	83.6336	61.4285	57.5207	3.26809			65.6917	60.312	81.884	17.397	6.882	10.548	32.005	18.993	25.417	4.92058	7.76396	1.23469	72.4865
Dominican Republic	DOM	2009	1.44215	10.7138	74.3785	85.0924	50.6509	59.7079	1.00345			68.6077	58.031	79.037	20.516	8.405	12.479	32.951	20.391	26.589	4.98449	7.81918	1.26774	73.5895
Dominican Republic	DOM	2010	6.32993	9.93802	74.4977	84.4357	56.0574	60.1185	8.40115		1.88729	68.8919	59.518	81.811	15.75	8.08	10.81	31.728	20.19	25.881	5.06186	7.9008	1.28013	74.1643
Dominican Republic	DOM	2011	5.79677	9.33526	76.4768	85.812	59.0693	60.7054	3.19196		1.87926	69.5538	60.936	81.564	19.488	10.903	13.956	32.152	20.546	26.268	5.16228	8.0225	1.26934	74.244
Dominican Republic	DOM	2012	3.6945	9.90572	75.3147	85.2205	58.5063	61.2165	2.77567	48.629		69.701	62.162	83.492	19.798	11.903	14.821	31.741	20.735	26.158	5.28553	8.18547	1.24692	74.2399
Dominican Republic	DOM	2013	4.83095	10.4695	73.4709	83.9404	56.8138	60.4379	4.93473		3.62818	71.6049	62.191	82.283	27.2	11.931	17.392	33.235	20.623	26.835	5.42818	8.38523	1.21814	74.2251
Dominican Republic	DOM	2014	2.99864	10.4972	71.9545	82.4517	55.6601	60.4427	7.11123	49.3193	3.62243	70.8017	62.542	79.402	20.858	9.277	13.343	31.623	19.386	25.411	5.58026	8.59967	1.18674	74.1932
Dominican Republic	DOM	2015	0.836746	10.3175	71.3053	81.6228	52.3471	61.0298	6.98771	51.7471	3.604	71.1527	65.249	84.237	24.275	12.116	16.426	31.096	19.551	25.232	5.74423	8.82833	1.14988	74.1372
Dominican Republic	DOM	2016	1.61417	10.3234	70.8467	81.1701	51.7307	62.0131	6.71974	54.499	3.8505	71.2597	65.747	84.464	25.916	11.713	16.738	31.698	19.252	25.374	5.92927	9.08948	1.11122	74.0507
Dominican Republic	DOM	2017	3.27956	10.6677	70.5514	81.2191	50.7595	62.1318	3.93386	59.9156	3.92027	70.2185	65.695	84.301	19.655	9.921	13.441	30.58	18.296	24.336	6.13305	9.38381	1.08787	73.9268
Dominican Republic	DOM	2018	3.56443	10.1454	69.0013	79.1467	52.3352	61.0675	7.09752		3.92849	70.3127	67.399	83.518	23.013	10.254	14.847	31.057	18.164	24.5	6.3528	9.70869	1.07428	73.7589
Dominican Republic	DOM	2019	1.8106	10.4393	68.5882	79.0275	50.913	60.9653	4.89403		4.04277	71.6539	68.788	84.102	22.983	11.755	15.835	30.735	18.928	24.727	6.58283	10.0542	1.03331	73.5403
Dominican Republic	DOM	2020	3.78103	12.0063	70.2529	82.2592	44.7332	60.0654	-7.92905	58.7264	4.5177	71.5693	63.741	80.08	20.774	11.552	14.766	44.388	31.254	37.702	6.80997	10.3957	1.04334	73.2644
Dominican Republic	DOM	2021	8.243	10.4769	68.1415	78.6185	51.95	57.8069	14.0124	56.4691	3.58043	71.7397	67.128	81.379	25.563	11.507	16.874	33.698	21.198	27.333	7.02935	10.7262	1.04083	72.9243
Dominican Republic	DOM	2022	8.81109	10.9578	68.6974	79.6553	54.3782	58.3199	5.23796	55.1665	3.61089	72.7709	67.268	81.997	17.672	9.93	12.852	31.854	21.559	26.61	7.28713	11.1219	0.95963	72.4203
Dominican Republic	DOM	2023	4.78561	11.2787	68.1037	79.3824	49.8436	59.5911	2.1923	58.2428	3.76065	73.4365	68.712	81.361	15.076	9.261	11.559	30.86	20.69	25.678	7.58086	11.5729	0.891159	72.3578
Dominican Republic	DOM	2024	3.30223	11.5071	67.7425	79.2496	51.7835	59.8122	4.95352	57.6509		73.7499	69.315	83.157	17.569	9.736	12.872	30.854	20.717	25.688	7.87948	12.0221	0.8462	72.4122
Dominican Republic	DOM	2025										74.0204	69.699		16.86	9.251	12.312	30.951	20.793	25.773
Ecuador	ECU	2005	2.16828	11.0375	68.2019	79.2394	61.9582	54.4342	5.39862			51.4431	69.085	84.21	9.893	6.64	7.864	27.368	7.837	17.459	5.22265	8.51872	1.72988	62.0069
Ecuador	ECU	2006	3.29875	10.8776	65.4433	76.3209	65.8424	52.4424	4.34113			51.7556	70.119	85.24	10.306	6.52	7.926	26.862	7.524	17.047	5.3327	8.6517	1.71825	62.21
Ecuador	ECU	2007	2.27618	11.1822	64.3859	75.5682	68.8506	51.9075	1.90243			52.8738	68.989	83.254	7.833	6.511	7.017	25.38	7.63	16.368	5.44564	8.78694	1.70789	62.3888
Ecuador	ECU	2008	8.4001	12.0058	60.4659	72.4718	74.5903	50.1895	6.56492	38.1872		53.2794	68.853	83.56	11.393	7.794	9.163	24.755	7.802	16.145	5.57029	8.94289	1.7052	62.5396
Ecuador	ECU	2009	5.15997	14.3982	63.1567	77.5549	57.3473	54.7058	1.09101		4.51763	52.6565	66.39	80.636	12.654	8.147	9.864	24.669	8.583	16.498	5.70494	9.11903	1.70577	62.6588
Ecuador	ECU	2010	3.55438	13.6566	63.6594	77.316	65.7774	53.5584	4.02914		4.60029	53.6098	65.193	79.606	12.226	7.56	9.286	23.433	8.133	15.66	5.8428	9.3002	1.67709	62.7405
Ecuador	ECU	2011	4.47453	13.0638	61.213	74.2769	70.0357	51.5009	8.48148		4.74425	54.1171	64.212	79.562	11.749	7.324	8.899	24.837	8.296	16.433	5.97547	9.47028	1.64154	62.7949
Ecuador	ECU	2012	5.10172	13.7469	60.5799	74.3268	67.0029	51.7422	5.78321	39.2525	4.6531	54.6902	64.985	79.889	10.748	7.301	8.538	24.291	9.065	16.554	6.10744	9.63687	1.59213	62.8409
Ecuador	ECU	2013	2.72178	14.2481	59.5513	73.7994	63.4333	52.0189	7.21124	39.7734	4.92998	54.4869	64.879	79.129	10.932	6.829	8.332	25.716	9.269	17.357	6.26391	9.83798	1.49741	62.8837
Ecuador	ECU	2014	3.58922	14.7396	59.2708	74.0104	61.4264	52.8342	4.22607		5.21021	55.0206	65.279	78.242	11.869	7.519	9.031	29.987	10.802	20.234	6.44847	10.0784	1.43206	62.9232
Ecuador	ECU	2015	3.96665	15.3738	64.2588	79.6326	47.828	57.6066	0.119692	44.5371	5.1057	54.4113	68.307	80.2	11.535	7.21	8.824	29.394	10.546	19.811	6.63998	10.3246	1.43093	62.9592
Ecuador	ECU	2016	1.72826	15.6897	63.5202	79.2099	40.5345	58.5675	-0.687954		4.46398	54.6503	70.343	80.581	14.077	8.001	10.349	26.858	10.303	18.44	6.82569	10.5543	1.45809	62.9913
Ecuador	ECU	2017	0.417336	15.2975	62.8686	78.1662	43.6177	58.0552	5.9704		4.60668	53.9624	70.957	80.554	11.424	6.614	8.465	26.097	9.308	17.56	7.00393	10.7679	1.52946	63.0195
Ecuador	ECU	2018	-0.224103	15.5568	62.8244	78.3812	48.0093	58.7476	1.04429	47.3312	4.62503	52.8689	69.52	79.215	10.417	6.447	7.956	25.859	9.752	17.67	7.19453	11.0001	1.71572	63.0433
Ecuador	ECU	2019	0.266013	15.1841	63.7523	78.9363	48.0828	59.4371	0.165404	47.2628	4.24578	53.2033	69.138	78.169	11.707	6.863	8.733	25.464	9.829	17.516	7.40791	11.2697	1.68935	63.0627
Ecuador	ECU	2020	-0.338872	16.3226	63.5147	79.8373	43.9893	61.3212	-9.2451	56.9066	4.26103	52.3239	63.457		14.979	8.688	11.068	26.964	12.209	19.462	7.56175	11.4495	1.18125	63.0774
Ecuador	ECU	2021	0.133251	14.4434	63.9383	78.3817	53.2613	58.459	9.42189		3.64777	50.9842	69.019	76.745	12.773	6.948	9.136	26.818	10.458	18.497	7.67037	11.5599	0.774314	63.0871
Ecuador	ECU	2022	3.46617	13.5358	64.0886	77.6244	61.8808	58.2032	5.86842	59.8798	3.59898	51.1283	69.149	77.853	10.876	6.642	8.298	25.87	10.383	17.99	7.8504	11.7816	0.796724	63.0902
Ecuador	ECU	2023	2.21569	13.5836	65.6317	79.2153	56.9978	58.6216	1.98824	67.8851	3.89365	52.5355	67.881	76.659	10.36	6.162	7.782	26.274	11.264	18.634	8.09288	12.0965	0.872456	63.1308
Ecuador	ECU	2024	1.54733	13.2902	64.8733	78.1635	57.2031	57.1566	-2.00125			50.767	68.007	77.163	11.322	6.849	8.574	27.359	10.845	18.951	8.344	12.4166	0.860548	63.2377
Ecuador	ECU	2025										50.9283	68.045		10.683	6.574	8.16	27.375	10.828	18.948
Egypt, Arab Rep.	EGY	2005	4.8694	12.7391	71.5506	84.2897	62.9526	45.9292	4.47174	28.4127	4.79443	46.1187	48.238		49.268	23.054	31.222	45.828	17.979	31.533	3.97614	6.47238	2.02221	42.9569
Egypt, Arab Rep.	EGY	2006	7.64453	12.2875	70.6006	82.8881	61.5185	44.69	6.84384	28.3696	4.00178	45.2446	49.206		52.275	21.087	30.516	46.101	17.16	31.251	3.94618	6.38823	1.95291	42.973
Egypt, Arab Rep.	EGY	2007	9.31897	11.3319	72.3953	83.7272	65.0779	46.894	7.08783	28.8399	3.68461	44.6782	50.156		44.436	17.318	25.076	44.935	15.589	29.884	3.92195	6.32477	1.88753	42.973
Egypt, Arab Rep.	EGY	2008	18.3168	10.8878	72.3171	83.2049	71.6806	46.6683	7.15628	28.6861	3.76083	45.0167	49.868	76.226	48.857	16.82	25.536	45.042	15.047	29.664	3.9078	6.28794	1.8674	42.9609
Egypt, Arab Rep.	EGY	2009	11.7635	11.351	76.0986	87.4496	56.5534	46.5661	4.6736	29.2693		45.8953	50.194	76.454	50.222	15.275	25.219	45.018	15.511	29.895	3.90866	6.28354	1.88837	42.9383
Egypt, Arab Rep.	EGY	2010	11.2652	11.1636	74.5732	85.7368	47.9364	46.2327	5.14723	30.0727		45.9092	51.677	77.438	52.248	14.369	24.583	51.437	15.622	33.084	3.92987	6.31987	1.91795	42.9057
Egypt, Arab Rep.	EGY	2011	10.0649	11.4507	75.5671	87.0177	45.2556	45.716	1.76457	25.5902		46.7732	51.162	77.225	50.426	22.167	29.426	47.395	17.556	32.099	3.96826	6.38517	2.10446	42.8634
Egypt, Arab Rep.	EGY	2012	7.11173	11.1781	80.713	91.8911	40.7118	51.7716	2.2262	26.2272		47.6695	50.858	77.01	53.724	27.87	34.439	44.61	19.157	31.553	4.02277	6.4783	2.24476	42.8119
Egypt, Arab Rep.	EGY	2013	9.46972	11.3524	80.773	92.1253	40.373	52.3007	2.18547	28.348		47.5122	50.89	76.835	49.016	28.64	34.12	39.966	17.421	28.396	4.08275	6.5839	2.30526	42.7514
Egypt, Arab Rep.	EGY	2014	10.0702	11.8498	82.939	94.7887	36.9202	52.321	2.91591	29.1134		47.6206	50.639	75.061	45.236	27.13	32.198	36.668	16.426	26.28	4.13855	6.6855	2.27644	42.6826
Egypt, Arab Rep.	EGY	2015	10.3705	11.7599	82.4297	94.1896	34.8459	53.1705	4.37202	32.8849		48.7061	49.436	75.834	39.872	31.411	34.16	35.844	19.781	27.605	4.20129	6.80517	2.09893	42.6056
Egypt, Arab Rep.	EGY	2016	13.8136	11.4269	83.0885	94.5154	30.2465	54.4833	4.34664	31.8731		48.9235	48.949	77.644	40.554	30.321	33.655	35.721	19.896	27.61	4.277	6.94309	2.03468	42.5211
Egypt, Arab Rep.	EGY	2017	29.5066	9.57904	84.4908	94.0699	42.8321	53.17	4.18122	33.1019		48.381	47.261	75.792	40.013	28.996	32.644	34.742	19.441	26.903	4.36669	7.09697	1.99818	42.4486
Egypt, Arab Rep.	EGY	2018	14.4015	7.94222	81.3746	89.3168	45.911	51.6422	5.33111	36.123		51.4594	45.647	70.098	52.799	17.873	26.252	36.215	18.403	27.095	4.47226	7.26668	1.89714	42.4577
Egypt, Arab Rep.	EGY	2019	9.1528	7.28556	79.8964	87.1819	41.124	50.7618	5.55209	33.6228		50.2364	44.561		51.834	12.876	20.631	40.122	16.347	27.959	4.59353	7.44924	1.75497	42.4812
Egypt, Arab Rep.	EGY	2020	5.04493	7.5399	80.8227	88.3626	32.1263	52.0271	3.55016	38.774		51.1244	44.021	63.833	46.054	13.09	18.463	43.789	17.123	30.156	4.69118	7.58665	1.62495	42.5182
Egypt, Arab Rep.	EGY	2021	5.21405	7.55804	82.9644	90.5224	29.857	52.4773	3.29065	35.1185		52.3557	45.534	63.718	42.743	13.067	18.21	41.535	16.501	28.743	4.74091	7.63835	1.49081	42.5686
Egypt, Arab Rep.	EGY	2022	13.8957	7.26809	79.685	86.9531	36.9831	51.4288	6.58785	36.4622		52.4234	45.42	64.216	35.751	11.981	16.342	38.971	15.381	26.92	4.8284	7.74773	1.4861	42.6325
Egypt, Arab Rep.	EGY	2023	33.8848	6.78851	78.96	85.7485	40.4504	51.6488	3.76028	37.9006		52.5126	47.332	64.715	36.589	12.008	17.153	35.314	14.272	24.567	4.96969	7.9394	1.68834	42.7098
Egypt, Arab Rep.	EGY	2024	28.2706	6.27032	87.5811	93.8514	39.6008	48.9325	2.39917	37.5781		52.8106	47.33	66.735	36.834	12.111	17.291	35.497	14.34	24.692	5.1163	8.13543	1.73324	42.8004
Egypt, Arab Rep.	EGY	2025								38.0398		53.118	47.368		38.711	12.884	18.293	35.68	14.409	24.817
El Salvador	SLV	2005	4.69095	13.9948	86.5832	100.578	69.7158	60.5377	2.68083	22.4543	3.17785	56.883	63.916		10.313	13.967	12.671	40.396	14.496	27.831	6.13119	10.4029	0.0151038	61.0308
El Salvador	SLV	2006	4.03712	14.3343	87.1664	101.501	73.4556	60.2822	4.337	23.2542	3.49298	57.1995	64.39		8.409	13.32	11.572	39.768	14.086	27.276	6.46564	10.9427	-0.0542809	61.9069
El Salvador	SLV	2007	4.57809	14.3442	91.3427	105.687	77.6211	59.419	1.8476	24.7437	3.60985	57.5995	64.873		8.177	12.981	11.372	40.13	13.743	27.223	6.63861	11.1714	0.124957	62.7677
El Salvador	SLV	2008	6.70792	14.7107	92.3014	107.012	80.666	58.7199	2.1544	25.5442	4.45811	56.8507	64.346		8.907	11.862	10.867	40.738	13.903	27.511	6.65049	11.0843	0.323496	63.6373
El Salvador	SLV	2009	1.05595	16.1017	88.0125	104.114	66.0712	60.9827	-2.10877	25.9217	4.6595	57.5362	63.781		12.967	14.333	13.87	42.088	15.583	28.93	6.67535	11.0101	0.314335	64.5299
El Salvador	SLV	2010	1.17934	15.7116	87.2607	102.972	73.5373	59.5028	2.1542	26.3152	4.04808	57.8719	63.19	79.75	12.016	9.188	10.156	40.63	13.778	27.214	6.71912	10.9651	0.329633	65.4328
El Salvador	SLV	2011	5.12892	15.7559	87.7673	103.523	79.2766	57.8388	3.77358	27.3249	3.89854	57.1369	62.786	77.897	9.387	8.111	8.541	39.045	12.903	25.91	6.7814	10.9518	0.359884	66.3344
El Salvador	SLV	2012	1.72973	15.7574	87.0395	102.797	77.6486	58.344	2.8877	28.0979	3.71244	58.0505	63.347	78.332	9.188	8.044	8.435	39.942	12.379	26.025	6.85511	10.9587	0.39082	67.2233
El Salvador	SLV	2013	0.757669	16.3059	87.6762	103.982	80.4512	59.5464	2.18295	28.2731	3.80149	60.0597	63.823	79.49	10.266	7.588	8.512	38.189	12.865	25.352	6.93866	10.9828	0.40585	68.0879
El Salvador	SLV	2014	1.14134	15.9542	86.6473	102.601	78.1044	59.4191	1.7294	27.5441	3.82416	60.3463	62.681	77.556	9.126	9.835	9.597	40.991	16.43	28.504	7.03019	11.025	0.392073	68.9167
El Salvador	SLV	2015	-0.731384	16.4974	85.0735	101.571	76.5603	60.013	2.4	27.3929	3.90988	59.7122	61.884	75.653	9.908	8.04	8.661	41.811	15.763	28.541	7.13082	11.0913	0.335655	69.6982
El Salvador	SLV	2016	0.604049	16.3164	83.618	99.9344	72.8191	60.3325	2.53906	27.1795	3.82524	60.2223	62.594	77.453	9.941	9.275	9.499	41.207	15.757	28.224	7.24509	11.1882	0.27654	70.399
El Salvador	SLV	2017	1.01235	16.1331	83.435	99.5681	74.3047	60.1161	2.24762	27.6409	3.72523	59.5395	62.516	76.781	12.109	8.559	9.747	42.05	15.313	28.398	7.37014	11.3126	0.205134	71.0857
El Salvador	SLV	2018	1.09033	16.1097	83.2837	99.3934	75.6336	60.1114	2.41244	28.1943	3.60575	61.0879	62.244	77.433	11.485	8.121	9.278	40.01	14.845	27.149	7.49958	11.4573	0.100922	71.7577
El Salvador	SLV	2019	0.0753241	16.032	81.7533	97.7854	76.042	59.9657	2.43747	28.5178	3.38711	61.1974	63.669	76.791	12.796	7.98	9.6	41.097	15.381	27.94	7.62636	11.6081	0.0403629	72.4149
El Salvador	SLV	2020	-0.37159	19.6969	80.4975	100.194	66.4595	61.4622	-7.8931	30.9986	3.66088	60.8504	60.159	76.868	14.79	9.232	11.084	36.114	14.746	25.169	7.70973	11.689	0.198363	73.057
El Salvador	SLV	2021	3.46693	19.3468	81.5804	100.927	81.8451	60.1847	11.9048	30.3043	3.57766	61.2282	62.962	76.891	14.053	7.667	9.804	38.452	14.464	26.152	7.76244	11.7184	0.338002	73.6839
El Salvador	SLV	2022	7.19862	18.8109	80.5516	99.3625	88.7011	60.4551	2.95462	31.4539	3.25634	61.5965	64.143	76.943	11.121	5.585	7.48	34.821	12.692	23.462	7.86163	11.8182	0.391462	74.1465
El Salvador	SLV	2023	4.04555	19.0637	79.1721	98.2358	81.7148	60.7619	3.53916	32.3803	3.17219	62.4677	65.435	78.818	9.711	5.542	7.031	31.732	11.854	21.518	8.00032	11.9784	0.465531	74.6081
El Salvador	SLV	2024	0.853782	19.1719	79.6221	98.7941	84.6596	61.0367	2.60202	32.8347		62.6594	65.936	77.327	10.327	5.928	7.507	31.952	11.932	21.657	8.14862	12.1539	0.451763	75.0675
El Salvador	SLV	2025										63.0108	66.21		10.342	6.394	7.809	32.167	12.009	21.795
Equatorial Guinea	GNQ	2005	5.63163	2.73606	13.9769	16.713	131.024		16.7487			34.4631	60.678		16.651	13.499	14.852	28.847	20.327	24.299	3.59581	6.32102	5.1384	42.2815
Equatorial Guinea	GNQ	2006	4.4159	7.27225	20.1081	27.3804	118.533	15.6914	7.70492			34.4381	60.511		16.443	13.37	14.698	28.853	20.374	24.336	3.55993	6.21618	4.43648	43.9301
Equatorial Guinea	GNQ	2007	2.80374	7.65841	19.5969	27.2553	134.084	17.4691	15.2821			34.7689	60.453		16.422	13.451	14.744	28.657	20.226	24.177	3.52171	6.11575	4.51135	45.8575
Equatorial Guinea	GNQ	2008	6.55177	6.65362	16.0439	22.6976	128.688	15.4147	17.7991			35.0525	60.49		16.305	13.442	14.696	28.336	19.892	23.863	3.47943	6.01479	4.57371	48.0445
Equatorial Guinea	GNQ	2009	4.69107	11.1344	23.0005	34.1348	122.212	23.6771	1.34336			34.6932	60.624		16.73	13.865	15.127	28.301	19.929	23.879	3.43316	5.91102	4.60787	50.4723
Equatorial Guinea	GNQ	2010	7.78917	11.6862	23.4088	35.0951	144.668	24.7326	-8.92418			33.5726	60.852		17.234	14.311	15.606	28.405	20.119	24.039	3.3842	5.80668	4.59587	53.1219
Equatorial Guinea	GNQ	2011	4.80539	11.7811	20.3564	32.1375	114.377	22.1315	6.52392			33.3966	61.181		17.138	14.305	15.564	27.959	19.705	23.621	3.33571	5.71263	4.3406	55.9743
Equatorial Guinea	GNQ	2012	3.65662	11.5818	20.1355	31.7173	116.675	22.9343	8.31287			33.4573	61.568		16.95	14.201	15.426	27.455	19.269	23.165	3.29177	5.63399	4.07485	59.0107
Equatorial Guinea	GNQ	2013	2.94888	15.458	25.8206	41.2786	106.893	27.1662	-4.1332			33.3781	61.949		16.653	14.121	15.252	27.076	19.02	22.862	3.25809	5.57447	3.99606	62.212
Equatorial Guinea	GNQ	2014	4.31	15.9664	27.7769	43.7433	104.379	29.0193	0.415066			33.5125	62.307		16.416	14.236	15.211	26.711	18.902	22.631	3.25069	5.5629	3.90502	65.5593
Equatorial Guinea	GNQ	2015	1.67663	21.9215	38.9381	60.8597	98.8781	39.1222	-9.11004			33.4415	62.605		16.582	14.45	15.404	26.712	19.118	22.745	3.26854	5.59589	3.7916	68.9513
Equatorial Guinea	GNQ	2016	1.41194	25.3273	47.7491	73.0764	92.6007	45.1807	-8.81642			33.2554	62.821		16.567	14.415	15.377	26.794	19.312	22.883	3.29999	5.65128	3.66422	69.2533
Equatorial Guinea	GNQ	2017	0.744355	23.6949	46.9754	70.6703	102.428	40.9	-5.66751			32.9048	62.952		16.384	14.586	15.389	26.64	19.499	22.904	3.34266	5.72408	3.53129	69.5516
Equatorial Guinea	GNQ	2018	1.06007	23.5278	48.3873	71.9151	103.646	40.4783	-6.23654			33.9812	62.981		16.016	14.431	15.14	26.661	19.733	23.033	3.39135	5.80214	3.39945	69.8397
Equatorial Guinea	GNQ	2019	1.53028	25.4607	56.2649	81.7256	94.8788	45.2983	-5.48183			33.8998	62.896		16.195	14.43	15.221	26.956	20.064	23.346	3.44128	5.8751	3.27145	70.1175
Equatorial Guinea	GNQ	2020	4.7667	28.4349	60.8136	89.2485	77.9279	51.291	-4.79108			33.7221	58.628		18.966	16.12	17.393	28.199	21.354	24.625	3.48288	5.9412	2.73391	70.3853
Equatorial Guinea	GNQ	2021	-0.0971008	25.4888	52.9759	78.4647	76.9666	46.9525	0.86027			34.1596	59.314		18.312	15.869	16.976	27.919	21.214	24.437	3.52078	6.00366	2.43551	70.6431
Equatorial Guinea	GNQ	2022	4.78672	22.1621	46.3786	68.5407	81.813	40.9755	3.22351			34.3496	62.863		17.136	14.723	15.81	27.606	20.561	23.964	3.5675	6.07194	2.51304	70.891
Equatorial Guinea	GNQ	2023	2.8595	26.2034	52.6753	78.8786	61.4433	50.3747	-5.08931			34.4458	62.878		16.719	14.428	15.457	27.947	20.632	24.182	3.62342	6.15268	2.41057	71.1291
Equatorial Guinea	GNQ	2024	2.9214	28.3432	52.9139	81.2571	60.5415	51.0975	0.907248			34.7541	62.661		16.865	14.481	15.556	28.459	20.959	24.614	3.68789	6.24785	2.40473	71.3574
Equatorial Guinea	GNQ	2025										34.7479	62.274		17.055	14.654	15.736	29.117	21.348	25.147
Eritrea	ERI	2005		35.2341	93.2011	128.435	61.106		2.57445			31.3905	82.11		11.592	8.976	10.223	30.735	13.859	22.348	3.37461	6.28634	2.39316	35.1022
Eritrea	ERI	2006		25.9199	91.8608	117.781	45.2608		-0.969217		2.127	30.9641	82.189		11.511	8.889	10.135	30.469	13.65	22.095	3.43061	6.4199	1.57652	35.2525
Eritrea	ERI	2007		25.6346	84.7076	110.342	34.5596		1.42682			30.9951	82.235		11.519	8.909	10.147	30.326	13.563	21.967	3.4941	6.56713	1.45852	35.3821
Eritrea	ERI	2008		26.3608	82.6291	108.99	30.561		-9.78303			29.4725	82.143		11.407	8.837	10.056	30.57	13.819	22.211	3.54817	6.64058	2.63004	35.4897
Eritrea	ERI	2009		20.1117	89.5394	109.651	27.9721		3.8765	3.67762		30.0357	82.014		11.628	8.996	10.245	30.861	14.135	22.509	3.60497	6.71771	2.50908	35.5742
Eritrea	ERI	2010		31.8063	113.711	145.517	37.4715		2.19419	4.35516		29.6239	81.932		11.911	9.168	10.469	31.25	14.866	23.062	3.66033	6.80747	1.96476	35.6347
Eritrea	ERI	2011		26.617	98.1717	124.789	47.3938		8.6798			30.8403	81.79		11.745	9.045	10.326	31.194	14.831	23.009	3.71231	6.87831	1.79352	35.6706
Eritrea	ERI	2012										31.1252	81.668		11.484	8.858	10.103	31.185	14.896	23.026	3.77403	6.97463	1.27591	35.6824
Eritrea	ERI	2013										29.351	81.604		11.23	8.788	9.945	31.127	15.002	23.043	3.82589	7.05722	1.22305	35.6713
Eritrea	ERI	2014								4.12872		32.0333	81.532		11.07	8.841	9.896	30.741	14.841	22.76	3.88318	7.17498	0.674705	35.6397
Eritrea	ERI	2015								3.51575		29.7974	81.574		11.174	9.014	10.034	31.313	15.908	23.57	3.93267	7.28784	0.334574	35.591
Eritrea	ERI	2016								3.20262		30.9015	81.495		11.117	8.998	9.998	31.441	16.046	23.696	3.96381	7.34618	0.614809	35.5254
Eritrea	ERI	2017										29.2729	81.383		10.974	9.108	9.989	31.604	16.487	23.994	4.00094	7.39736	0.817497	35.4427
Eritrea	ERI	2018										31.059	81.124		10.703	8.995	9.802	31.74	16.76	24.198	4.03411	7.40749	1.33731	35.3451
Eritrea	ERI	2019										31.5373	80.835		10.804	8.984	9.845	32.226	17.208	24.665	4.06758	7.40353	1.47475	35.2352
Eritrea	ERI	2020										30.4376	79.917		12.341	9.994	11.1	33.7	18.373	25.984	4.091	7.37034	1.56406	35.1161
Eritrea	ERI	2021										30.0942	80.339		12.152	9.914	10.976	33.486	18.516	25.952	4.10061	7.30614	1.77412	34.9871
Eritrea	ERI	2022										30.6262	80.83		11.353	9.135	10.186	33.06	18.076	25.52	4.11605	7.26151	1.75351	34.8469
Eritrea	ERI	2023										31.0392	80.854		11.11	8.933	9.965	32.973	18.011	25.445	4.15096	7.26055	1.77169	34.6964
Eritrea	ERI	2024										31.3427	80.88		11.239	8.988	10.056	33.188	18.201	25.649	4.20288	7.28905	1.86169	34.5366
Eritrea	ERI	2025										31.7823	80.902		11.439	9.161	10.241	33.42	18.349	25.841
Estonia	EST	2005	4.07971	16.8522	54.3505	71.2218	135.913	59.0829	9.52305	67.9844	4.80935	60.7326	70.554	79.847	13.801	16.063	15.123	14.189	7.889	10.944	16.7235	24.5676	-0.572256	67.5081
Estonia	EST	2006	4.43762	15.8324	54.1285	69.9774	136.621	57.875	9.76257	68.7951		61.395	72.808	82.173	15.16	9.986	12.118	11.391	6.58	8.914	17.081	25.1333	-0.589656	67.5557
Estonia	EST	2007	6.60133	15.8992	52.4026	68.3068	133.981	57.066	7.57092	68.8221	4.61967	60.0956	73.214	81.655	7.147	12.149	10.097	10.062	8.76	9.392	17.3722	25.6322	-0.456189	67.6098
Estonia	EST	2008	10.3624	18.4365	53.3079	71.7496	136.682	59.5535	-5.12531	67.8356	5.48376	60.8311	74.238	80.372	11.311	12.598	12.032	9.717	8.502	9.092	17.4425	25.7756	-0.268134	67.6697
Estonia	EST	2009	-0.0784083	20.5333	53.3393	73.8775	116.759	60.8503	-14.6302	67.8494	5.95976	64.5037	74.08	80.514	21.829	31.502	27.41	14.495	14.439	14.466	17.4326	25.814	-0.192768	67.7349
Estonia	EST	2010	2.97205	19.5617	52.4261	71.9922	143.672	59.9238	2.44975	68.7102	5.51754	65.4655	73.901	79.761	29.517	35.62	32.938	13.446	14.572	14.026	17.4403	25.9051	-0.228058	67.8048
Estonia	EST	2011	4.9819	18.295	50.0578	68.7387	166.746	58.4513	7.60697	71.0235	4.99514	63.1533	74.769	79.268	20.595	23.803	22.386	11.364	11.761	11.568	17.5716	26.2281	-0.303583	67.8776
Estonia	EST	2012	3.9334	18.0243	50.3159	69.2794	169.156	59.1902	3.67202	72.9365	4.67341	64.4033	74.845	80.596	18.473	22.752	20.862	13.219	11.241	12.2	17.8628	26.8429	-0.357944	67.963
Estonia	EST	2013	2.78057	18.3992	50.7656	70.4821	164.602	59.7117	1.75649	75.4523	4.78007	65.4644	75.201	80.401	19.782	17.769	18.704	11.826	10.843	11.319	18.1985	27.5472	-0.355892	68.0923
Estonia	EST	2014	-0.106175	18.439	49.84	69.8374	157.954	59.8999	3.32279	76.2025	4.32586	65.9935	75.32	79.864	9.978	19.173	14.975	11.633	11.858	11.749	18.5609	28.3143	-0.262256	68.2668
Estonia	EST	2015	-0.492326	19.2233	50.4667	71.4963	148.507	60.7173	1.83815	74.5833	5.05127	64.702	76.324	81.215	13.02	15.417	14.342	13.212	9.849	11.482	18.8888	29.0164	0.0655525	68.4797
Estonia	EST	2016	0.148685	19.3324	50.4429	71.763	147.746	60.8286	3.09302	73.0334	5.05512	65.884	77.216	81.154	10.633	17.162	14.125	11.869	7.391	9.568	19.186	29.671	0.0291122	68.724
Estonia	EST	2017	3.41724	18.875	49.227	70.0863	144.636	61.1537	5.63467	72.137	4.86288	66.2006	78.324	81.989	9.415	14.583	12.176	10.792	9.3	10.026	19.4674	30.2962	0.121071	68.9932
Estonia	EST	2018	3.43633	18.7629	49.1546	69.8338	143.485	61.6254	3.6997	72.066	5.13963	66.4107	78.665	81.647	11.233	12.838	12.076	9.597	11.063	10.348	19.6755	30.7618	0.348039	69.2804
Estonia	EST	2019	2.27726	19.0819	49.0441	69.9578	140.352	62.3217	3.72665	72.706	5.16415	67.2842	78.338	82.139	12.109	11.175	11.623	7.759	7.955	7.859	19.8965	31.2502	0.371554	69.5787
Estonia	EST	2020	-0.444531	20.5087	49.0014	71.4297	137.393	63.9508	-2.88381	72.0444	5.4418	67.2031	78.626	81.853	18.611	18.24	18.417	9.813	8.626	9.204	20.2001	31.8807	0.197559	69.8816
Estonia	EST	2021	4.65317	19.8175	49.3538	70.2923	160.472	62.7167	8.25488	73.1502	5.21515	68.2952	78.856	76.643	14.934	18.204	16.622	9.695	12.086	10.921	20.4338	32.3398	0.105997	70.1777
Estonia	EST	2022	19.3983	19.3667	51.0306	71.9501	175.687	62.7009	-1.22617	71.4252	5.20734	68.7854	80.873	77.46	16.35	20.663	18.392	7.797	13.528	10.735	20.63	32.6751	1.33655	70.4892
Estonia	EST	2023	9.15923	20.5544	52.0428	73.9383	154.593	65.1357	-2.74422	67.6179		70.0336	81.335	78.16	16.311	18.17	17.207	7.159	11.911	9.595	20.9141	33.1351	1.57745	70.677
Estonia	EST	2024	3.52056			74.4456	151.038	65.6971	-0.0900429			70.4787	81.217	77.963	19.408	19.093	19.256	8.573	11.811	10.233	21.2973	33.7704	0.149856	70.6981
Estonia	EST	2025										71.0458	81.121		19.38	20.037	19.695	8.626	11.824	10.266
Eswatini	SWZ	2005	4.774					45.8926	5.99228	4.78245	6.48462	59.2788	53.836		58.029	51.42	54.7	44.385	32.552	38.829	2.62557	4.66183	0.544844	22.2102
Eswatini	SWZ	2006	5.30464					46.1551	6.72881	4.60428	6.55476	59.3526	53.799		58.9	52.379	55.638	44.499	32.532	38.903	2.69878	4.77325	0.500496	22.1506
Eswatini	SWZ	2007	8.07609					46.1648	4.31772			59.4838	53.728		60.08	53.496	56.793	44.603	32.606	38.984	2.76005	4.85469	0.576424	22.14
Eswatini	SWZ	2008	12.6575					47.4447	1.44055		6.61812	59.7512	53.599		59.458	52.964	56.211	44.347	32.384	38.699	2.8122	4.90553	0.674894	22.1692
Eswatini	SWZ	2009	7.44823					47.4644	1.43311		6.47135	60.0388	53.469		58.775	52.405	55.585	44.037	32.133	38.366	2.8729	4.96886	0.641057	22.2344
Eswatini	SWZ	2010	4.50924					48.4209	3.82443		6.11837	60.1499	53.37		57.627	51.458	54.535	43.593	31.763	37.913	2.95462	5.07281	0.586161	22.3331
Eswatini	SWZ	2011	6.10743					49.2865	1.83974	7.0284	6.86433	60.4402	53.293		56.21	50.298	53.245	43.085	31.342	37.406	3.05068	5.20613	0.554659	22.4635
Eswatini	SWZ	2012	8.93965					47.7032	4.09048		5.59328	60.5592	53.245		54.523	48.877	51.687	42.581	30.974	36.929	3.14415	5.3395	0.537987	22.6238
Eswatini	SWZ	2013	5.62131	18.8521	66.6026	85.4547	85.2035	48.7179	4.09459	6.43546	5.08461	60.8478	53.196		53.174	47.78	50.462	42.156	30.68	36.531	3.2287	5.45803	0.543693	22.8122
Eswatini	SWZ	2014	5.68135	19.7382	61.6128	81.3511	91.62	49.1685	2.05738		7.35739	61.3241	53.127		51.889	46.757	49.309	41.793	30.396	36.17	3.31484	5.57421	0.556771	23.0269
Eswatini	SWZ	2015	4.95124	22.7243	58.5985	81.3228	88.2621	49.1854	1.70426		5.35495	61.7897	53.044		50.801	45.925	48.353	41.493	30.165	35.869	3.39636	5.67745	0.571628	23.266
Eswatini	SWZ	2016	7.84727	24.6005	56.8264	81.4269	89.3585	50.8591	2.94917		5.43355	62.3506	52.973	82.555	49.277	44.68	46.973	41.115	29.859	35.498	3.47505	5.77744	0.584039	23.5279
Eswatini	SWZ	2017	6.22138	24.5379	58.3329	82.8708	86.8801	50.8419	3.52095		6.17791	63.8706	52.813		50.646	46.1	48.365	40.556	29.785	35.156	3.57587	5.91601	0.75296	23.8052
Eswatini	SWZ	2018	4.81506	23.706	60.1935	83.8995	85.4928	51.8896	0.0653957		5.73687	65.3576	52.647		52.178	47.69	49.927	40.031	29.735	34.848	3.68641	6.06744	0.922519	24.0579
Eswatini	SWZ	2019	2.59802	21.7274	59.1586	80.886	86.6408	51.3142	6.43187		5.69915	66.6959	52.486		53.405	49.002	51.201	39.403	29.585	34.446	3.79566	6.21354	0.931971	24.346
Eswatini	SWZ	2020		25.2347	56.2827	81.5174	84.014	52.9824	-2.95183		5.32546	67.5575	51.851		61.651	55.606	58.611	40.059	30.386	35.166	3.87485	6.30676	1.08363	24.6653
Eswatini	SWZ	2021		21.9543	58.9634	80.9177	89.9314	52.6581	4.23622		5.28715	68.7067	52.164	75.736	59.082	54.277	56.669	38.951	29.932	34.389	3.9229	6.34849	1.15567	25.0156
Eswatini	SWZ	2022		19.9867	61.5015	81.4882	92.5716	50.7756	0.386071		5.57274	63.7536	52.84		61.734	55.315	58.474	39.533	32.537	36	4.01504	6.47228	1.01621	25.3967
Eswatini	SWZ	2023		19.4174	62.4774	81.8948	99.7246	51.894	3.53258		5.00432	58.6571	53.593	73.347	58.19	50.324	54.239	39.084	33.9	36.472	4.14687	6.66876	0.946271	25.8082
Eswatini	SWZ	2024		21.5109	63.4858	84.9967	107.481	51.3634	2.97391		6.03083	59.0104	53.651		58.244	50.443	54.37	39.228	33.975	36.588	4.26196	6.83168	0.995913	26.2498
Eswatini	SWZ	2025										58.72	53.681		57.725	50.868	54.329	39.374	34.053	36.704
Ethiopia	ETH	2005	9.96997					39.145	11.8188	2.94168		14.5173	83.226	94.234	4.723	2.647	3.602	15.637	5.838	10.654	2.63413	5.2755	2.96602	15.983
Ethiopia	ETH	2006	12.2995					38.5726	10.8347		5.49096	15.1584	83.168		4.519	2.537	3.45	15.468	5.744	10.524	2.64743	5.28163	2.93729	16.2148
Ethiopia	ETH	2007	17.2404					39.1141	11.4562		5.45113	15.894	83.108		4.517	2.55	3.457	15.424	5.733	10.498	2.66223	5.28323	2.93016	16.0948
Ethiopia	ETH	2008	44.3567					37.9001	10.7885	3.53212	5.4082	16.563	83.048		4.5	2.554	3.453	15.41	5.741	10.496	2.68168	5.28756	2.89436	16.7937
Ethiopia	ETH	2009	8.48364					38.7708	8.80255	5.09216	4.42207	17.1162	82.99		4.497	2.566	3.46	15.377	5.754	10.487	2.70907	5.30135	2.83966	17.1511
Ethiopia	ETH	2010	8.14926					41.7551	12.5505	6.96483	4.49659	18.2259	82.935		4.454	2.554	3.435	15.342	5.603	10.394	2.74348	5.32231	2.83517	17.4938
Ethiopia	ETH	2011	33.25	10.3182	72.4333	82.7516	48.2329	41.4301	11.1783	7.27566	5.48576	19.1862	82.882		4.424	2.549	3.42	15.344	5.633	10.413	2.78336	5.34867	2.84354	17.8638
Ethiopia	ETH	2012	23.6004	8.30219	72.4632	80.7653	45.3979	38.5815	8.64781	7.62417	5.56678	19.6736	82.831		4.404	2.551	3.414	15.351	5.708	10.457	2.82747	5.37887	2.8039	18.2061
Ethiopia	ETH	2013	7.46402	8.95547	73.467	82.4225	41.4718	39.6701	10.5823		4.49855	20.5578	82.779	93.594	4.411	2.571	3.429	15.355	5.748	10.482	2.86974	5.40303	2.71847	18.6155
Ethiopia	ETH	2014	6.89002	9.24959	70.2145	79.4641	40.7411	39.892	10.2575	5.91925	4.60202	22.2994	81.126		4.702	2.706	3.634	16.587	6.397	11.421	2.90826	5.41909	2.683	19.0263
Ethiopia	ETH	2015	9.5689	9.01379	71.2444	80.2582	39.6561	39.5457	10.3925		4.73792	24.1663	79.474		4.961	2.822	3.813	17.668	6.922	12.223	2.93507	5.41395	2.6848	19.4516
Ethiopia	ETH	2016	6.62813	11.0526	66.4668	77.5195	34.899	36.7246	9.43348		5.06151	25.9401	77.823		5.269	2.969	4.031	18.847	7.437	13.07	2.95342	5.39479	2.70788	19.8764
Ethiopia	ETH	2017	10.6871	15.4931	66.5307	82.0239	31.1036	36.6337	9.56419		5.49905	27.8879	76.184		5.579	3.118	4.25	20.01	7.975	13.921	2.97727	5.38843	2.72524	20.3085
Ethiopia	ETH	2018	13.833	10.25	65.6642	75.9142	31.1994	36.4097	6.81615		5.22011	29.4872	74.55		5.949	3.302	4.515	21.219	8.537	14.806	3.0059	5.39613	2.69675	20.7838
Ethiopia	ETH	2019	15.8096	9.20441	68.6823	77.8867	28.8153	37.1503	8.36409		4.48087	31.2994	72.935		6.286	3.466	4.752	22.415	9.003	15.636	3.03819	5.41557	2.69124	21.2487
Ethiopia	ETH	2020	20.3563	9.12948	70.0433	79.1727	24.0061	36.8281	6.05953		4.09057	29.7462	70.686		8.536	4.553	6.356	24.914	9.648	17.2	3.06905	5.43385	2.71077	21.626
Ethiopia	ETH	2021	26.8395	8.83582	72.2205	81.0563	24.3451	36.5357	5.64153		4.06525	30.2267	69.514	91.613	8.295	4.564	6.246	25.212	10.003	17.529	3.09361	5.44251	2.6725	22.1067
Ethiopia	ETH	2022	33.8899	7.36173	77.4036	84.7654	26.5955	36.5535	5.32176		3.7365	30.7088	69.803		7.253	3.951	5.45	24.663	9.839	17.175	3.12442	5.46515	2.6227	22.7368
Ethiopia	ETH	2023	30.2188	6.31777	78.9192	85.237	20.5982	36.9796	6.59425		2.92724	31.464	69.835		7.245	3.951	5.455	24.481	9.869	17.101	3.17131	5.51887	2.60362	23.0586
Ethiopia	ETH	2024	21.0377	5.51569	80.2307	85.7464	17.4004	37.4719	7.61277		2.29781	32.5756	69.901		7.216	3.941	5.449	24.529	9.923	17.151	3.22998	5.59691	2.5835	23.6223
Ethiopia	ETH	2025										33.4086	69.924		7.077	3.879	5.353	24.578	9.977	17.201
Faroe Islands	FRO	2005		30.2729	64.5807	94.8536	100.963	57.5789													13.3384	20.911	-0.0516833	36.3321
Faroe Islands	FRO	2006		27.673	57.4496	85.1226	97.3947	55.2835													13.5243	21.1389	-0.0496411	36.4584
Faroe Islands	FRO	2007		28.2473	54.8532	83.1005	99.506	55.966													13.7775	21.5285	0.0889229	36.293
Faroe Islands	FRO	2008		31.3856	53.9945	85.3801	103.496	59.0805													14.1078	22.1114	0.348724	36.4679
Faroe Islands	FRO	2009		33.4774	58.5268	92.0042	96.8608	61.1013	-4.5533												14.4467	22.724	0.501347	36.8888
Faroe Islands	FRO	2010		32.8827	51.3337	84.2163	97.1824	58.2041	-0.379818												14.8621	23.4218	-0.275019	37.2537
Faroe Islands	FRO	2011		32.5959	52.1245	84.7197	105.846	58.9737	3.56636												15.3054	24.1815	-0.234568	37.2976
Faroe Islands	FRO	2012		31.7515	54.0304	85.7811	117.158	61.3919	7.08148												15.6869	24.8744	-0.52048	37.3245
Faroe Islands	FRO	2013		30.4001	51.1805	81.5806	114.062	60.237	5.85614												16.0845	25.6342	-0.0932285	37.7415
Faroe Islands	FRO	2014		28.8625	48.6933	77.5558	106.143	58.0087	5.43214												16.5311	26.5381	0.376524	37.9094
Faroe Islands	FRO	2015		28.2578	46.9527	75.2105	105.611	56.9192	0.958002												16.8959	27.2332	0.967879	38.1432
Faroe Islands	FRO	2016		27.6579	45.658	73.3158	104.553	54.2285	1.38645												17.1387	27.6737	1.14882	38.32
Faroe Islands	FRO	2017		27.5662	43.4827	71.0489	107.239	53.8171	3.51201												17.3079	28.0324	1.43714	38.3325
Faroe Islands	FRO	2018		28.405	43.1224	71.5274	106.875	54.5831	2.76371												17.3943	28.2116	1.61307	38.4059
Faroe Islands	FRO	2019		27.6094	41.8608	69.4698	108.623	52.8237	4.53851												17.4879	28.3714	1.54885	38.3946
Faroe Islands	FRO	2020		29.5557	43.5554	73.111	96.2242	53.4756	-1.63732												17.6861	28.729	1.48148	38.669
Faroe Islands	FRO	2021		28.4856	42.1755	70.661	103.488	53.91	5.06636												17.8358	28.9826	1.38108	38.8084
Faroe Islands	FRO	2022		26.9463	40.8447	67.7906	122.863	51.693	3.861												17.7927	28.8022	1.14918	38.996
Faroe Islands	FRO	2023		26.9717	40.5959	67.5676	113.336	51.6384	3.15874												17.726	28.5355	0.926839	39.1975
Faroe Islands	FRO	2024		27.8615	40.6085	68.47	105.753	53.8269	0.843717												17.7375	28.4729	0.489483	39.4132
Fiji	FJI	2005	2.36576					57.3342	0.7	14.4559	5.16706	50.9018	58.265	71.672	15.568	6.98	9.64	32.617	8.9	20.549	3.92008	6.14023	0.912262	49.8421
Fiji	FJI	2006	2.49084					56.8058	1.85248		5.65532	50.6232	59.362		15.806	7.715	10.257	34.621	14.179	24.213	4.03014	6.28935	0.900982	50.2295
Fiji	FJI	2007	4.80371					58.0868	-0.850654		5.89472	50.0637	60.452	82.267	16.311	8.586	11.048	36.584	19.703	27.983	4.14755	6.45153	0.835148	50.6495
Fiji	FJI	2008	7.73228					57.4672	1.03279		4.25357	49.4919	61.532		16.601	9.37	11.711	34.153	17.277	25.558	4.26423	6.61511	0.618135	51.098
Fiji	FJI	2009	3.13104					58.4838	-1.38604		4.49848	48.9138	62.597		17.019	10.248	12.477	31.869	14.929	23.254	4.37658	6.77411	0.424161	51.5628
Fiji	FJI	2010	3.68901					57.488	2.95467			48.3258	63.653		17.175	10.991	13.061	29.477	12.37	20.79	4.50227	6.9535	0.349901	52.0415
Fiji	FJI	2011	7.27812					58.1563	2.70514		4.17306	47.9049	64.699	80.472	17.389	11.787	13.694	27.199	9.856	18.404	4.65088	7.16742	0.28189	52.5335
Fiji	FJI	2012	3.42338					57.9956	1.41131		4.46151	47.4601	63.689		17.969	11.752	13.934	27.249	10.415	18.725	4.79425	7.37455	0.211061	53.0383
Fiji	FJI	2013	2.91354					56.8721	4.73422		3.88289	47.0146	62.644		18.538	11.745	14.203	27.169	10.884	18.935	4.93451	7.58178	0.156613	53.5553
Fiji	FJI	2014	0.519306					55.5437	5.60351	69.4328	3.76961	46.4382	61.562	92.07	19.016	11.714	14.435	27.025	11.307	19.09	5.08226	7.80425	0.134465	54.0838
Fiji	FJI	2015	1.37489					55.4372	4.5012	68.4168	4.80932	47.4455	60.864		20.113	11.597	14.631	28.216	11.021	19.55	5.20838	7.99316	0.10816	54.6234
Fiji	FJI	2016	3.86323					54.5353	2.44565	77.5601	4.8359	48.2579	60.15	80.733	21.502	11.626	14.992	29.496	10.793	20.086	5.32891	8.17094	0.0639915	55.1735
Fiji	FJI	2017	3.34758					54.4864	5.35336	82.3436	4.65119	48.9142	60.08		21.638	11.78	15.117	29.01	11.206	20.071	5.47734	8.38805	-0.0442891	55.7408
Fiji	FJI	2018	4.08148					53.9248	3.81235	79.1464	4.79706	49.5275	60.051		21.654	11.926	15.207	28.572	11.644	20.093	5.64437	8.62841	-0.17201	56.2328
Fiji	FJI	2019	1.7731					55.4425	-0.581947	77.5562	5.15273	49.9238	60.134		21.5	12.09	15.28	28.216	12.168	20.199	5.82086	8.8791	-0.249007	56.7099
Fiji	FJI	2020	-2.59524					54.1449	-17.1835	83.7614	5.8052	49.0753	56.693		23.644	13.235	16.749	29.074	14.45	21.786	5.98707	9.11176	0.00699506	57.1867
Fiji	FJI	2021	0.155856					53.5006	-4.34596	76.703	4.85269	49.1878	57.241		22.282	12.973	16.146	28.669	14.949	21.847	6.10367	9.26367	0.190864	57.6618
Fiji	FJI	2022	4.32012					55.0131	17.7451	68.7795	3.9384	50.0045	60.099		20.914	12.833	15.729	27.278	14.203	20.787	6.20928	9.39534	0.295295	58.1353
Fiji	FJI	2023	2.34408					56.2281	9.44246	60.9679	4.2468	50.6528	60.245		20.118	12.571	15.296	26.755	14.555	20.701	6.34305	9.57129	0.512377	58.6069
Fiji	FJI	2024	4.51138					54.5684	3.53086	75.009		51.2828	60.333	79.897	19.712	12.533	15.133	26.411	15.073	20.786	6.48698	9.76664	0.500722	59.0767
Fiji	FJI	2025										51.7108	60.326		19.722	12.652	15.208	26.417	14.96	20.732
Finland	FIN	2005	0.623874	21.4143	49.6435	71.045	76.589	55.8549	2.77731	91.9409	6.02583	69.191	76.458	79.935	26.052	27.474	26.78	7.737	8.05	7.897	15.9352	23.8893	0.342249	68.5141
Finland	FIN	2006	1.56666	21.3252	49.8285	71.1329	82.0006	54.9436	4.01957	93.431	5.92961	69.4872	76.712	79.038	25.272	26.253	25.774	8.756	7.473	8.1	16.2327	24.3733	0.383777	68.7588
Finland	FIN	2007	2.51067	20.7683	48.5788	69.3402	82.8632	54.6892	5.3128	95.0835	5.67165	69.2389	75.373	78.729	16.58	16.276	16.426	8.564	6.212	7.362	16.4861	24.7775	0.42543	69.02
Finland	FIN	2008	4.06595	21.5662	49.3248	70.8849	86.1897	56.222	0.784431	95.8669	5.83046	70.4704	75.765	79.14	15.771	16.88	16.337	8.045	8.274	8.162	16.629	24.9811	0.465549	69.2944
Finland	FIN	2009	-9.1736e-07	24.0691	52.149	76.2115	70.1279	59.6038	-8.07603	92.0155	6.45998	72.026	74.68	78.012	18.907	23.806	21.376	7.98	10.891	9.467	16.8796	25.4002	0.478246	69.5463
Finland	FIN	2010	1.18414	23.6857	52.6291	75.9055	75.4612	58.9677	3.16829	93.1868	6.50431	71.3878	74.174	76.984	18.968	23.52	21.288	7.953	9.32	8.651	17.2594	26.0781	0.457495	69.7856
Finland	FIN	2011	3.41681	23.4019	53.2544	76.2581	78.7159	59.3372	2.39039	93.2884	6.45624	72.4667	74.854	76.758	18.334	21.463	19.934	8.37	8.425	8.398	17.8214	27.1287	0.463559	70.0583
Finland	FIN	2012	2.80834	24.1763	54.22	77.9946	79.4304	60.7916	-1.52284	91.5534	7.17155	73.2386	74.965	76.635	17.972	19.746	18.868	7.117	8.284	7.713	18.45	28.3377	0.475809	70.3661
Finland	FIN	2013	1.47829	24.6357	54.4028	78.6483	77.4852	60.565	-0.979741	91.2365	7.15288	73.594	75.028	75.248	16.992	22.644	19.817	8.113	10.645	9.406	19.0734	29.5691	0.460724	70.6742
Finland	FIN	2014	1.0412	24.6314	54.7973	79.0216	74.6278	60.8822	-0.478068	89.9939	7.13833	72.9109	75.133	75.135	18.294	22.584	20.454	8.681	10.984	9.857	19.6661	30.761	0.41356	70.9879
Finland	FIN	2015	-0.207929	24.5228	54.7804	78.7575	71.9618	60.9405	0.466504	89.6574	7.07199	74.5357	75.543	75.089	19.608	24.992	22.304	9.006	12.106	10.59	20.2091	31.8584	0.329384	71.3055
Finland	FIN	2016	0.356685	23.8688	54.7852	77.7607	71.7222	60.469	2.57193	89.328	6.90873	73.8103	75.667	74.365	18.546	21.558	20.057	8.59	9.856	9.238	20.6838	32.8168	0.287421	71.6158
Finland	FIN	2017	0.754015	22.9491	53.5371	75.4395	75.9388	59.8466	3.30337	90.6984	6.40827	74.4117	76.48	73.906	19.294	20.781	20.041	8.304	9.442	8.888	21.1457	33.7493	0.234671	71.9563
Finland	FIN	2018	1.08382	23.0551	53.4426	75.17	79.1436	59.9099	1.19298	92.385	6.31772	74.5913	77.74	74.804	16.768	17.151	16.958	7.919	7.582	7.746	21.6155	34.6872	0.132641	72.3423
Finland	FIN	2019	1.02409	23.3186	52.8602	74.8296	80.5642	60.0093	1.34974	94.5891	6.453	74.6497	77.947	73.753	15.593	18.584	17.128	7.301	7.466	7.386	22.0614	35.547	0.110192	72.7431
Finland	FIN	2020	0.290555	24.4205	51.5062	74.6619	72.1846	60.046	-2.49104	96.4726	6.68128	75.1612	78.078	74.071	19.354	22.894	21.193	8.441	10.239	9.365	22.4907	36.3639	0.143641	73.0849
Finland	FIN	2021	2.19457	24.7954	51.6558	75.1576	79.7893	60.159	2.67635	100.868	6.5882	74.1752	78.692	75.597	16.405	17.67	17.058	7.202	9.713	8.492	22.875	37.0921	0.207289	73.371
Finland	FIN	2022	7.12351	24.149	52.2145	74.7076	94.5625	59.4281	0.763042	104.944	6.37604	75.2016	79.654	74.039	13.987	14.283	14.138	7.261	8.833	8.068	23.2288	37.7395	0.271945	73.6968
Finland	FIN	2023	6.25064	25.6198	53.385	77.0909	85.5634	61.7736	-0.939093	108.13		75.0161	79.703	75.361	15.414	16.81	16.106	7.248	10.352	8.841	23.5779	38.3461	0.499192	74.0063
Finland	FIN	2024	1.56569			77.2172	83.4601	62.2145	0.416172			75.4573	79.424	73.582	17.991	19.363	18.68	7.362	8.941	8.171	23.8972	38.8765	0.64264	74.2637
Finland	FIN	2025										75.6666	79.414		20.757	22.197	21.479	7.341	8.944	8.161
France	FRA	2005	1.74587	23.1175	54.514	77.5844	55.8228	68.7116	1.88857	53.8823		72.3588	69.65	74.413	22.695	20.059	21.225	12.066	10.646	11.348	16.4377	25.2657	0.751885	77.4363
France	FRA	2006	1.67512	22.7854	54.299	77.3284	57.8693	68.9051	2.71406	53.8754		72.2083	69.585	73.998	24.197	21.074	22.447	12.895	10.699	11.784	16.4418	25.2562	0.696339	77.3467
France	FRA	2007	1.488	22.4735	54.2136	76.8664	58.1526	69.1752	2.53048	52.9475		73.0427	69.709	74.585	20.62	18.851	19.644	11.661	10.347	10.996	16.4623	25.289	0.618226	77.2458
France	FRA	2008	2.81286	22.5896	54.5311	77.3146	59.1798	69.7683	0.380171	52.4755		73.974	69.874	75.725	19.38	19.083	19.214	11.143	10.595	10.866	16.549	25.463	0.558021	77.1562
France	FRA	2009	0.0876205	24.088	55.3941	79.7195	52.1991	70.8158	-2.82455	52.7731		74.3685	70.222	74.997	22.827	24.961	24.006	13.865	14.799	14.338	16.6603	25.6977	0.513351	77.1005
France	FRA	2010	1.53112	23.9798	55.3339	79.5967	56.5876	70.7107	2.00032	54.8817		74.805	70.193	75.286	24.741	22.666	23.592	13.052	12.705	12.876	16.7823	25.944	0.492976	77.0963
France	FRA	2011	2.1116	23.7011	54.8819	79.0283	60.6056	70.2767	2.43758	55.6257		74.8847	70.098	75.344	24.19	22.07	23.018	12.821	12.02	12.415	17.0555	26.4831	0.482667	77.1183
France	FRA	2012	1.9542	23.9564	54.7324	79.118	61.659	70.3955	0.183835	57.909		75.2868	70.739	76.181	24.694	25.154	24.949	12.419	13.256	12.843	17.4831	27.3249	0.483715	77.1669
France	FRA	2013	0.863715	24.0757	54.5542	79.1162	61.8192	70.4097	0.781756	59.8488		75.62	71.239	76.164	25.028	23.835	24.363	13.214	13.648	13.434	17.9296	28.1795	0.516915	77.2441
France	FRA	2014	0.507759	24.0814	54.2096	78.8792	62.1993	70.4282	0.997833	61.5105		76.6215	70.999	77.381	23.998	25.486	24.828	12.859	14.12	13.5	18.3879	29.0644	0.474848	77.3524
France	FRA	2015	0.0375144	23.7758	53.9733	78.4012	63.5047	70.309	1.06675	62.7859		76.879	71.223	77.515	24.033	26.254	25.262	13.125	14.781	13.967	18.8516	29.9692	0.355569	77.7611
France	FRA	2016	0.183335	23.7569	54.3195	78.7485	63.3428	70.603	0.860031	64.7277		76.8343	71.284	77.289	24.854	25.008	24.938	13.532	14.333	13.94	19.2847	30.7903	0.263869	78.5999
France	FRA	2017	1.03228	23.7014	54.1154	78.5908	65.3958	70.3852	2.08361	65.8022	5.46483	76.9833	71.435	76.602	21.73	23.237	22.572	12.519	14.295	13.425	19.6708	31.5248	0.290202	78.6468
France	FRA	2018	1.85082	23.3501	54.0635	78.3547	66.8023	70.1367	1.64591	67.5435	5.42541	77.2707	71.871	76.548	20.005	21.696	20.953	12.001	14.119	13.082	20.0394	32.2284	0.358495	78.6714
France	FRA	2019	1.10825	23.0348	53.7288	77.6248	66.429	70.1102	2.02745	67.7331	5.36638	77.0927	71.665	76.637	18.798	20.843	19.929	12.051	13.161	12.618	20.4101	32.9295	0.332559	78.6891
France	FRA	2020	0.476499	24.8398	53.1863	78.92	58.8389	70.977	-7.44065	68.8709	5.65872	77.6852	71.091	75.651	20.602	20.232	20.398	12.178	13.201	12.701	20.7474	33.5646	0.324558	78.7119
France	FRA	2021	1.64233	24.3516	52.4496	77.7649	63.7885	70.6736	6.88234	69.9398	5.41743	77.9704	73.021	77.388	19.297	19.212	19.252	10.388	12.527	11.483	21.0508	34.1157	0.356902	78.7365
France	FRA	2022	5.22237	23.8743	53.0924	78.7076	75.963	71.7575	2.71676	71.5107	5.32436	78.1326	73.552	77.286	16.572	18.937	17.856	10.237	12.814	11.557	21.3773	34.7084	0.502321	78.7592
France	FRA	2023	4.87836	23.0901	53.2796	78.7858	70.6261	70.2119	1.43921	70.4536		78.2487	73.952	77.218	16.495	18.19	17.419	10.384	13.154	11.804	21.7491	35.384	0.275093	78.7804
France	FRA	2024	1.99905			78.8148	68.1082	70.9142	1.19047			78.065	74.069	77.4	18.326	18.832	18.603	11.403	13.682	12.571	22.1466	36.0997	0.261995	78.8
France	FRA	2025										78.3267	74.004		18.831	18.939	18.89	11.402	13.679	12.568
French Polynesia	PYF	2005		31.7734	61.3263	93.0997	58.8757	75.3966	0.309973			79.2253	60.673		38.332	30.138	33.474	30.645	20.192	25.399	5.1228	7.72723	1.49587	56.8473
French Polynesia	PYF	2006		31.7459	62.3908	94.1367	56.6133	76.5643	0.889584			79.3837	60.469		38.395	30.721	33.855	30.656	20.528	25.571	5.35041	8.0229	1.42179	57.5826
French Polynesia	PYF	2007		32.0133	62.3627	94.3759	57.4555	76.3347	1.70498			79.458	60.242		38.277	31.207	34.11	30.551	20.753	25.637	5.57015	8.30721	1.214	58.4102
French Polynesia	PYF	2008		32.6266	63.5806	96.2072	58.0396	76.5467	0.00676755			79.5462	60.372		38.149	31.227	34.109	30.345	20.498	25.409	5.78864	8.58975	0.725859	59.2616
French Polynesia	PYF	2009		33.1668	64.2002	97.367	51.6751	76.3102	-4.23139			81.1362	60.537		38.597	31.702	34.61	30.348	20.451	25.386	6.00486	8.87439	0.409773	60.0681
French Polynesia	PYF	2010		33.4321	66.6938	100.126	54.0439	76.9288	-2.46606			81.3762	60.719		39.029	32.161	35.095	29.966	20.482	25.212	6.21295	9.15402	0.406992	60.761
French Polynesia	PYF	2011		33.8536	67.7196	101.573	56.232	77.6556	-2.96196			81.3994	60.905		39.387	32.553	35.51	29.658	20.317	24.977	6.41342	9.42897	0.423008	61.2717
French Polynesia	PYF	2012		33.0229	68.0633	101.086	57.8807	77.1321	-0.927538			81.691	61.087		39.128	32.404	35.349	29.276	20.031	24.644	6.61226	9.70619	0.498155	61.5287
French Polynesia	PYF	2013		32.3289	67.398	99.7269	56.062	76.7118	0.398801			81.9335	61.124		39.268	32.443	35.431	28.924	19.824	24.362	6.8304	10.0099	0.600208	61.613
French Polynesia	PYF	2014		31.387	66.4797	97.8666	56.2325	76.1641	0.593554			82.1064	61.164		39.362	32.422	35.457	28.267	19.527	23.88	7.07376	10.3458	0.602054	61.6825
French Polynesia	PYF	2015		31.0891	65.3433	96.4323	55.6305	75.8292	1.80334			82.4041	61.228		39.588	32.478	35.583	27.914	19.257	23.568	7.31522	10.673	0.533693	61.7375
French Polynesia	PYF	2016		31.1774	64.848	96.0254	53.6165	75.8534	2.3022			82.6345	61.297		39.899	32.589	35.778	27.721	19.076	23.382	7.55684	10.9962	0.471059	61.7744
French Polynesia	PYF	2017		31.2555	64.5341	95.7896	54.5777	76.1355	4.29263			82.7561	61.451		40.191	32.553	35.867	27.284	18.853	23.044	7.87489	11.434	0.32507	61.7897
French Polynesia	PYF	2018		30.7249	64.8716	95.5965	65.0147	76.0094	1.80687			82.9771	61.502		40.721	32.799	36.201	26.543	18.644	22.541	8.30422	12.0155	-0.0971599	61.7888
French Polynesia	PYF	2019		30.6497	65.9732	96.6229	63.3061	76.1953	2.68947			83.0268	61.571		41.213	33.014	36.499	26.222	18.694	22.382	8.77511	12.646	-0.279503	61.7824
French Polynesia	PYF	2020		34.7751	70.9627	105.738	45.8332	75.904	-10.5738			83.31	60.813		47.257	37.199	41.469	28.189	21.089	24.563	9.20637	13.2491	0.0626967	61.7673
French Polynesia	PYF	2021		33.7649	72.8045	106.569	52.9788		3.3659			83.3049	60.869		43.922	35.099	38.858	26.634	19.883	23.182	9.65289	13.8911	0.208586	61.74
French Polynesia	PYF	2022		32.7727	73.9149	106.688	69.5264		2.93735			83.3673	60.93		41.707	33.235	36.815	25.526	18.785	22.076	10.1727	14.6342	0.209222	61.6914
French Polynesia	PYF	2023		31.7756	73.4588	105.234	71.6722		2.77284			83.455	60.616		41.149	32.846	36.378	25.263	18.576	21.846	10.7255	15.4231	0.263582	61.6967
French Polynesia	PYF	2024		32.0122	73.7012	105.713	64.4689		1.12639			83.6302	60.389		41.168	32.936	36.459	25.275	18.635	21.886	11.3241	16.2762	0.244793	61.7192
French Polynesia	PYF	2025										83.7483	60.3		41.07	33.184	36.566	25.194	18.656	21.859
Gabon	GAB	2005	3.70833	12.5353	30.0324	42.5677	83.9496	29.5651	2.6762			50.0157	50.205		38.729	27.519	32.223	36.142	25.63	30.849	4.57583	8.10537	2.90381	83.4327
Gabon	GAB	2006	-1.4094	13.3398	30.1208	43.4606	88.6494	30.9213	-2.80658			49.731	50.309		39.942	28.524	33.336	36.26	25.916	31.045	4.50231	7.91188	3.01803	84.0852
Gabon	GAB	2007	5.03032	13.6741	29.5224	43.1966	85.1325	31.3484	6.00811			50.2403	50.38		40.3	28.9	33.725	36.065	25.914	30.94	4.42979	7.72471	3.1263	84.69
Gabon	GAB	2008	5.2643	12.4305	27.0791	39.5096	88.9989	28.9831	-3.30843			50.0421	50.579		41.502	29.966	34.867	36.184	26.18	31.126	4.36014	7.54875	3.22073	85.2438
Gabon	GAB	2009	1.88571	16.1236	35.0564	51.18	83.5046	36.8182	0.130331			50.0574	50.797		41.944	30.468	35.359	36.052	26.273	31.101	4.29438	7.38814	3.32765	85.7433
Gabon	GAB	2010	1.46154	13.4869	30.6426	44.1296	89.1577	30.8276	7.08989		3.07809	50.8908	51.004		42.49	31.047	35.935	35.748	26.194	30.904	4.23326	7.24517	3.44994	86.1853
Gabon	GAB	2011	1.26332	12.7937	27.5735	40.3672	90.4984	25.6326	7.09175		2.98746	51.6761	51.254		41.736	30.554	35.337	35.28	25.877	30.505	4.17815	7.12017	3.5474	86.5665
Gabon	GAB	2012	2.65242	14.0308	29.4452	43.476	92.3428	27.4557	5.25108		3.0134	52.2716	51.543		41.417	30.397	35.117	34.952	25.741	30.268	4.12984	7.01079	3.57747	86.8839
Gabon	GAB	2013	0.505441	14.4562	32.2834	46.7396	90.635	29.6058	5.6387		3.02971	52.8742	51.831		41.614	30.637	35.345	34.564	25.541	29.97	4.08304	6.90601	3.52009	87.1482
Gabon	GAB	2014	4.69046	14.8495	34.49	49.3395	73.5203	32.679	4.31496		2.66667	53.2917	52.127		41.908	30.948	35.658	34.299	25.501	29.818	4.04211	6.81641	3.35844	87.6236
Gabon	GAB	2015	-0.338795	14.8164	37.8384	52.6548	73.9498	39.0292	3.8789		2.82436	53.5989	52.417		42.078	31.154	35.857	34.04	25.445	29.665	4.01688	6.76229	3.11466	88.0853
Gabon	GAB	2016	2.10671	14.6412	40.4392	55.0804	70.1334	41.7428	2.09144		2.66773	53.7325	52.711		42.408	31.474	36.191	33.888	25.369	29.559	4.00292	6.73665	2.86486	88.5446
Gabon	GAB	2017	2.65193	13.2317	39.9697	53.2014	75.0687	42.6497	0.472642		3.55571	53.7101	53		42.752	31.797	36.532	33.572	25.247	29.352	3.99444	6.72754	2.6589	89.001
Gabon	GAB	2018	4.74907	10.5658	38.6144	49.1802	77.0366	41.1182	0.837917		3.07154	53.69	53.245		43.026	32.053	36.804	33.356	25.142	29.202	3.99084	6.72972	2.53688	89.454
Gabon	GAB	2019	2.46457	10.9934	37.6737	48.6671	73.4281	40.4704	3.92081		2.87431	53.7329	53.4		42.895	31.977	36.711	33.121	24.943	28.995	3.9926	6.74068	2.47279	89.9032
Gabon	GAB	2020	1.35276	13.1476	41.9041	55.0516	70.1141	44.8163	-1.83776		3.39874	52.979	49.753		47.15	34.032	39.702	33.511	25.515	29.486	3.99307	6.74634	2.38922	90.3481
Gabon	GAB	2021	1.08691	11.8173	34.1963	46.0135	85.3483	38.576	1.46796		2.70079	52.9508	50.398		44.811	33.168	38.244	33.045	25.332	29.169	3.99542	6.75103	2.30612	90.7882
Gabon	GAB	2022	4.23125	10.807	30.0717	40.8787	92.0631	33.4381	3.03761		2.20774	52.6956	53.542		42.927	31.881	36.64	32.832	25.073	28.939	4.01134	6.77418	2.24764	91.2243
Gabon	GAB	2023	3.62902	11.4661	34.4799	45.946	91.4787	37.8094	2.43894		2.31594	52.4057	53.477		42.654	31.665	36.407	32.803	25.021	28.903	4.04183	6.81637	2.19891	91.6376
Gabon	GAB	2024	1.17312	10.2614	33.4936	43.755	92.0468	36.8219	3.39404			52.1617	53.31		42.508	31.536	36.283	32.986	25.203	29.086	4.08255	6.86918	2.15637	91.8632
Gabon	GAB	2025										52.2824	53.053		42.407	31.624	36.281	33.308	25.453	29.369
Gambia, The	GMB	2005	4.83862	8.24735	92.9819	101.229	50.0187	50.7407	-2.35173		0.69188	52.6119	49.198		18.185	11.351	14.407	40.917	20.925	30.914	2.73692	5.32753	2.78121	52.3582
Gambia, The	GMB	2006	2.0565	8.38617	85.7985	94.1847	50.3745	55.6042	-0.555581		0.75163	52.7174	49.096		18.627	11.641	14.739	41.262	20.897	31.074	2.70298	5.23079	2.85256	53.1603
Gambia, The	GMB	2007	5.36913	7.92005	87.2808	95.2008	44.2938	57.3574	3.04325		0.81686	52.9853	49.047		18.851	11.796	14.926	41.49	20.857	31.167	2.67772	5.15218	2.90157	53.9196
Gambia, The	GMB	2008	4.44365	9.77516	93.1208	102.896	39.0891	52.9886	6.25591		2.1813	53.2359	49.043		18.337	11.455	14.533	41.498	20.741	31.112	2.66254	5.09345	2.90665	54.6431
Gambia, The	GMB	2009	4.56151	9.59933	90.3978	99.9971	41.7774	51.1004	6.66572		1.90814	53.7178	49.048		17.914	11.181	14.22	41.501	20.624	31.053	2.65621	5.0526	2.9043	55.3379
Gambia, The	GMB	2010	5.04968	10.1386	93.3087	103.447	41.0125	49.2005	5.90834	1.79782	2.56322	54.1395	49.048		17.743	11.077	14.108	41.559	20.515	31.023	2.65656	5.02711	2.90738	56.0111
Gambia, The	GMB	2011	4.79588	9.2315	85.9391	95.1706	42.6397	54.9002	-8.13044	2.79682	2.50117	53.3439	48.856		18.674	11.672	14.761	41.95	20.306	31.109	2.66082	5.01363	2.92338	56.6697
Gambia, The	GMB	2012	4.25432	8.75316	78.3863	87.1395	47.7007	54.4512	5.24157	1.18089	2.63757	53.5537	48.861	84.929	18.75	11.737	14.847	42.001	20.214	31.083	2.66263	4.99983	2.94592	57.3207
Gambia, The	GMB	2013	5.69913	9.27477	85.5434	94.8181	45.4619	55.1263	2.87277		1.81839	53.5431	48.834		16.873	11.23	13.73	39.881	21.743	30.787	2.65258	4.96493	2.92894	57.9703
Gambia, The	GMB	2014	5.948	8.8368	87.4238	96.2606	58.2579	56.4387	-1.40738		2.23094	52.9847	48.745		14.56	10.373	12.207	37.776	23.134	30.43	2.62946	4.90355	2.84476	58.6142
Gambia, The	GMB	2015	6.80845	8.32658	81.6612	89.9878	44.5224	51.8898	4.05807		2.16003	52.9561	48.731		12.592	9.787	11.019	35.663	24.558	30.089	2.61482	4.85722	2.73429	59.2458
Gambia, The	GMB	2016	7.22879	8.44662	78.9831	87.4298	38.1141	48.798	1.94336		2.02443	52.6745	48.694		10.627	9.181	9.815	33.624	25.916	29.752	2.61986	4.84681	2.62819	59.8652
Gambia, The	GMB	2017	8.03419	7.86686	86.0234	93.8903	55.7336	53.4254	4.82261		2.45919	53.0309	48.697		8.481	8.364	8.415	31.541	27.203	29.361	2.63862	4.85997	2.52588	60.4717
Gambia, The	GMB	2018	6.52097	6.82478	88.4987	95.3235	64.8125	54.9038	7.23489		2.36544	53.6493	48.73	78.154	6.534	7.645	7.15	29.493	28.487	28.987	2.6706	4.89438	2.42294	61.0646
Gambia, The	GMB	2019	7.11568	8.24288	86.4067	94.6496	55.9979	54.7742	6.22205		2.8081	54.111	48.75		7.32	8.208	7.809	31.274	30.884	31.078	2.71509	4.94906	2.35622	61.6432
Gambia, The	GMB	2020	5.93128	8.99177	87.7412	96.7333	47.3955	53.9537	0.591487		2.88735	52.6244	48.692		9.849	10.375	10.14	33.486	33.68	33.584	2.76623	5.01223	2.36866	62.2069
Gambia, The	GMB	2021	7.37035	9.75804	90.8871	100.645	42.098	53.3932	5.25597		3.04478	52.0083	48.691		10.257	10.597	10.444	35.262	36.086	35.677	2.82128	5.07842	2.36775	62.7551
Gambia, The	GMB	2022	11.5131	8.36246	91.5504	99.9129	44.7219	55.6295	5.493		2.89169	52.3325	48.695		10.095	10.22	10.163	36.925	38.361	37.648	2.88979	5.16715	2.31992	63.287
Gambia, The	GMB	2023	16.9742	9.61731	92.8124	102.43	39.962	55.0253	5.9168		2.80838	52.3367	48.697	56.417	10.881	10.751	10.811	38.777	40.904	39.848	2.97786	5.29009	2.30124	63.802
Gambia, The	GMB	2024	11.5611	9.55019	86.2407	95.7909	42.1706	56.7898	5.55126	13.4766		53.0005	48.713		10.894	10.775	10.83	38.836	40.819	39.835	3.07824	5.4315	2.2773	64.2994
Gambia, The	GMB	2025										53.6437	48.698		11.28	10.503	10.863	38.896	40.739	39.824
Georgia	GEO	2005	8.24709	14.3836	73.1079	87.4915	84.5296	51.089	9.59114	49.7897	2.48432	37.1497	74.859		27.164	25.259	26.159	34.657	20.706	27.852	14.5094	21.9283	-0.635292	53.0036
Georgia	GEO	2006	9.16097	12.0081	85.2479	97.256	89.1254	55.2245	9.42148	42.332	3.00365	36.5695	74.226		27.31	27.29	27.299	35.629	22.631	29.276	14.776	22.2434	-0.568485	53.3594
Georgia	GEO	2007	9.2449	16.4966	79.6126	96.1092	88.3934	56.8437	12.5756	41.554	2.69687	37.1981	73.403		31.91	26.055	28.744	37.282	22.096	29.847	14.7773	22.1334	-0.521647	53.7706
Georgia	GEO	2008	9.99949	19.3998	85.4898	104.89	86.2982	60.7122	2.42161	38.6407	2.91955	37.786	73.142		38.8	32.663	35.471	39.745	24.852	32.442	14.5065	21.6025	-0.303791	54.2233
Georgia	GEO	2009	1.72751	18.5227	89.4012	107.924	78.193	60.6555	-3.65075	28.6669	3.22238	38.2297	73.176		46.087	38.362	41.902	43.202	27.749	35.608	14.0937	20.8828	-0.888185	54.7034
Georgia	GEO	2010	7.11018	17.3025	78.5053	95.8077	81.6734	62.4462	6.24641	32.7361	2.76179	39.0915	72.676		42.194	38.017	39.911	41.061	27.022	34.141	13.7529	20.3161	-0.729475	55.1969
Georgia	GEO	2011	8.54293	15.535	79.0847	94.6197	85.4659	61.2165	7.93434	35.9206	2.51492	38.2736	72.202	76.585	42.804	39.013	40.71	40.529	26.716	33.696	13.6139	20.0973	-0.802164	55.6899
Georgia	GEO	2012	-0.943659	14.0907	78.3369	92.4276	89.7349	61.4683	6.57883	33.6165	1.86034	39.8258	71.909	77.042	39.091	36.115	37.431	39.221	25.821	32.562	13.662	20.2003	-0.736566	56.1684
Georgia	GEO	2013	-0.512058	14.6421	75.5878	90.2299	93.8139	61.7606	5.13289	40.5871	2.8331	39.596	71.782	75.845	38.743	41.373	40.223	35.994	25.903	30.954	13.8539	20.5588	-0.300972	56.6182
Georgia	GEO	2014	3.06881	15.0157	75.9221	90.9378	94.9507	61.1488	4.09049	46.3291	2.94114	40.5939	71.738	76.134	32.447	41.129	37.367	32.826	24.748	28.772	14.0293	20.9494	0.0469539	57.0238
Georgia	GEO	2015	4.00358	14.6097	75.2555	89.8651	97.0163	60.392	3.35102	51.9051	3.1087	42.6478	71.729	76.092	37.791	34.386	35.85	33.22	21.75	27.436	14.1419	21.2866	0.157481	57.3804
Georgia	GEO	2016	2.13493	15.1858	70.8396	86.0254	94.9263	60.7127	3.45022	58.1988	3.52338	42.065	71.726	77	31.335	37.755	35.019	31.457	22.297	26.815	14.2607	21.6408	0.0598166	57.6984
Georgia	GEO	2017	6.03532	13.8912	71.8146	85.7058	102.584	58.3265	5.1599	63.535	3.52442	41.5155	71.68	73.797	32.312	26.04	28.687	28.529	21.123	24.758	14.3744	21.9792	0.0133861	57.9997
Georgia	GEO	2018	2.61524	13.2887	69.2425	82.5312	109.848	58.3496	6.06204	66.7478	3.46095	44.5424	69.837	72.104	34.631	26.477	29.691	30.793	23.083	26.851	14.5183	22.3579	-0.0390365	58.3038
Georgia	GEO	2019	4.8529	13.1443	68.8895	82.0338	117.81	60.0997	5.38072	69.6464	3.82986	45.4326	68.553	71.978	32.381	28.646	30.059	28.925	23.221	25.998	14.7045	22.8003	-0.171566	58.6304
Georgia	GEO	2020	5.20246	14.6115	79.8724	94.4838	92.8911	57.8886	-6.29047	71.8065	3.80951	45.5292	68.843	72.301	32.274	30.025	30.851	26.341	23.552	24.906	14.8875	23.221	0.0686562	58.9991
Georgia	GEO	2021	9.56691	14.1267	81.4469	95.5736	101.601	58.6986	10.6442	77.2303	3.59442	46.3969	66.731	72.885	32.252	29.6	30.603	25.73	22.988	24.317	14.9888	23.4796	-0.379637	59.4294
Georgia	GEO	2022	11.8982	12.5294	73.1417	85.6711	114.695	59.0492	10.9585	79.3253	3.75498	48.0998	69.644	72.125	32.518	28.672	30.136	25.355	22.159	23.708	15.0869	23.6784	0.10489	60.0102
Georgia	GEO	2023	2.48776	12.1485	71.4697	83.6183	107.151	62.0559	7.8322	78.2652	3.70918	48.2634	70.229	72.362	32.266	28.48	29.931	25.455	22.26	23.81	15.3175	24.0683	0.080264	60.7523
Georgia	GEO	2024	1.10972	12.8969	70.4296	83.3264	103.456	61.9846	9.67979		3.98012	48.8807	70.794	75.113	32.158	28.422	29.863	25.591	22.284	23.89	15.6377	24.6016	-0.42956	61.079
Georgia	GEO	2025										49.4768	70.879		31.941	29.2	30.258	25.725	22.307	23.97
Germany	DEU	2005	1.54691	18.474	55.6293	76.3113	66.9531	63.6742	0.885485			67.8346	73.891	74.472	13.986	16.751	15.463	12.117	10.608	11.353	18.8587	28.2959	-0.0567783	80.1745
Germany	DEU	2006	1.57743	18.0173	54.7421	74.9223	72.7592	63.0772	3.86668			67.6354	75.304	74.877	12.153	14.494	13.402	11.106	8.639	9.855	19.4956	29.4081	-0.112797	80.1961
Germany	DEU	2007	2.29834	17.5554	53.0877	72.8229	74.8838	62.234	2.88912			67.3476	75.917	74.811	10.816	12.726	11.824	9.724	9.215	9.465	19.9912	30.2789	-0.133719	80.2199
Germany	DEU	2008	2.62838	17.9539	53.3286	73.3287	76.1132	62.5998	0.887902		4.47337	69.045	76.068	72.966	10.526	11.28	10.929	8.913	7.725	8.308	20.2873	30.7992	-0.190143	80.246
Germany	DEU	2009	0.312739	19.605	55.349	77.2237	66.1391	64.6564	-5.54455			69.5318	76.415	73.752	9.897	12.563	11.309	9.398	7.256	8.307	20.5216	31.2252	-0.253383	80.2745
Germany	DEU	2010	1.10381	19.1828	54.037	75.3635	73.8852	62.7062	4.13464		4.99525	69.6245	76.606	73.802	9.038	11.597	10.416	9.479	7.462	8.451	20.5654	31.2836	-0.153198	80.3057
Germany	DEU	2011	2.07517	18.6996	53.3304	73.8788	78.433	62.0439	3.75797		4.88584	70.6144	77.022	74.251	8.16	9.608	8.927	8.556	7.772	8.156	20.5215	31.1406	-1.85371	80.3406
Germany	DEU	2012	2.00849	18.9052	53.8483	74.488	79.3316	61.8201	0.463512		4.83153	70.2287	77.15	74.272	7.563	8.6	8.119	8.069	6.43	7.231	20.6376	31.2827	0.187728	80.3934
Germany	DEU	2013	1.50472	19.2534	53.5076	74.4371	77.586	62.3614	0.396996	60.8984	4.83912	70.8152	77.605	74.112	6.991	8.554	7.825	7.209	5.65	6.41	20.813	31.5566	0.2729	80.4732
Germany	DEU	2014	0.906794	19.2146	52.4012	73.3215	76.8484	62.2966	2.18019	65.1845	4.82583	70.4767	77.752	74.058	7.017	8.128	7.612	7.192	5.582	6.365	20.9587	31.822	0.416877	80.5757
Germany	DEU	2015	0.514426	19.3036	51.9259	73.088	77.7566	62.6076	1.66301	68.2329	4.76158	70.976	77.575	73.63	6.392	8.133	7.328	7.124	5.417	6.239	21.0534	32.0269	0.865703	80.6974
Germany	DEU	2016	0.491747	19.5246	51.7561	73.0226	76.006	62.3594	2.22222	67.9464	4.74631	71.3557	77.781	74.031	6.183	7.837	7.079	7.429	6.038	6.701	21.135	32.2482	0.807219	80.8348
Germany	DEU	2017	1.50949	19.4479	51.0774	72.3579	77.4548	62.49	2.79791	68.4692	4.77831	71.3142	78.178	74.072	5.851	7.558	6.77	6.74	5.835	6.266	21.2936	32.6343	0.373725	80.9843
Germany	DEU	2018	1.73217	19.4858	51.0593	72.4811	79.1252	62.7863	1.1357	69.1634	4.88401	71.3852	78.511	73.74	5.206	7.063	6.22	6.598	5.475	6.011	21.4498	33.0059	0.300527	81.1423
Germany	DEU	2019	1.44566	19.8895	51.0147	73.0115	79.0732	63.0068	0.977735	72.7051	5.02758	71.6631	79.208	74.372	4.818	6.712	5.859	6.165	5.096	5.607	21.6284	33.4241	0.22552	81.3054
Germany	DEU	2020	0.144878	21.7244	49.5162	72.9649	72.9335	63.8751	-4.13191	72.3894	5.51601	71.656	78.535	72.689	8.018	7.73	7.862	7.825	6.808	7.295	21.8447	33.9238	0.0816932	81.47
Germany	DEU	2021	3.06667	21.6396	48.4879	72.2068	79.9195	63.5454	3.91	75.6655	5.36734	71.407	78.655	72.976	6.303	6.966	6.665	8.193	7.568	7.868	22.1345	34.581	0.0423271	81.6326
Germany	DEU	2022	6.87257	21.3296	49.614	74.2529	88.7858	63.4807	1.80926	77.3657	5.23916	71.9534	79.329	72.707	5.638	6.393	6.049	7.936	6.562	7.223	22.4589	35.2969	-0.0219566	81.7868
Germany	DEU	2023	5.94644	21.0589	49.5271	74.0337	81.9625	63.6154	-0.869648	78.5947		72.3926	79.762	72.949	5.38	6.568	6.02	7.871	7.508	7.683	22.79	36.0064	0.131511	81.9034
Germany	DEU	2024	2.2565			74.7232	79.0907	64.0457	-0.495852			72.6164	79.94	72.832	5.935	7.181	6.604	7.689	7.228	7.451	23.1956	36.8803	0.274958	82.0211
Germany	DEU	2025										72.9548	79.994		5.893	7.702	6.862	7.695	7.234	7.457
Ghana	GHA	2005	15.439	15.3082	80.9628	96.271	98.1715	28.9146	5.9	5.351	7.42208	24.8566	73.513		10.898	10.468	10.671	31.622	23.026	27.28	3.33811	5.93246	2.62276	47.4528
Ghana	GHA	2006	11.6792	8.68201	81.9315	90.6135	64.5191	45.4707	6.39991	4.77281	5.14794	25.2883	73.47	86.028	9.729	9.286	9.494	31.3	22.624	26.916	3.35962	5.94124	2.59967	48.1389
Ghana	GHA	2007	10.7343	8.52494	92.3947	100.92	65.3543	47.1686	4.34682	5.92381	5.51987	27.8002	73.428		10.455	9.594	9.996	29.459	21.211	25.29	3.37851	5.94527	2.57743	48.8125
Ghana	GHA	2008	16.4946	8.73166	94.2317	102.963	69.5142	46.1739	9.1498	7.91365	5.75796	30.3707	73.385		10.951	9.665	10.264	27.509	19.503	23.462	3.38782	5.93312	2.53778	49.4709
Ghana	GHA	2009	19.2469	7.57424	89.0049	96.5792	71.5947	47.9362	4.84449	8.2978	5.31744	33.0893	73.338		11.739	10.009	10.811	25.645	18.389	21.978	3.38595	5.90503	2.49528	50.1111
Ghana	GHA	2010	10.7334	7.0695	93.6137	100.683	75.3778	48.1812	7.89971		5.5406	35.9962	73.291	75.372	12.223	10.061	11.059	23.669	16.9	20.248	3.37979	5.87666	2.43301	50.7297
Ghana	GHA	2011	8.72846	13.7886	85.8236	99.6122	86.2955	45.8449	14.0471	11.2824	8.14097	36.7766	73.243		9.741	8.014	8.808	25.702	17.26	21.436	3.36998	5.84856	2.40497	51.3304
Ghana	GHA	2012	11.1863	11.7643	83.7175	95.4819	93.168	47.583	9.29279	11.4939	7.91914	37.4947	73.194		7.365	6.071	6.664	27.692	17.71	22.649	3.35645	5.8164	2.41991	51.9198
Ghana	GHA	2013	11.6662	8.78317	76.3228	85.1059	60.7593	40.5886	7.31253	13.4205	4.57647	38.2418	73.146	80.522	5.194	4.32	4.718	29.611	17.968	23.73	3.34808	5.7934	2.40928	52.4986
Ghana	GHA	2014	15.4896	8.26779	71.9399	80.2077	63.8366	37.4137	2.85624	15.0809	4.39979	38.6941	71.977		9.276	9.334	9.307	33.535	21.074	27.242	3.35054	5.78749	2.36499	53.0663
Ghana	GHA	2015	17.15	7.68049	73.4677	81.1482	76.5213	40.5153	2.12076	15.5619	4.43405	39.2227	70.779	83.894	13.618	14.779	14.238	37.966	24.586	31.211	3.3588	5.7876	2.30713	53.6226
Ghana	GHA	2016	17.4546	7.88693	72.1479	80.0349	67.877	43.9159	3.37347	15.6063	4.39452	39.8479	69.607		10.168	11.016	10.616	31.699	22.894	27.255	3.36937	5.78626	2.27621	54.1671
Ghana	GHA	2017	12.3719	6.95705	76.272	83.2291	70.5484	43.4829	8.12889	16.2066	3.53363	40.4779	68.41	66.754	6.151	6.58	6.375	25.26	20.769	22.994	3.38516	5.78864	2.19536	54.6991
Ghana	GHA	2018	7.80877	7.10478	72.2346	79.3394	67.9585	43.6785	6.20008	15.9046	3.88613	43.3304	66.879		5.919	6.277	6.107	25.8	20.304	23.027	3.40729	5.79996	2.07517	55.2185
Ghana	GHA	2019	7.14364	7.0432	76.2351	83.2783	76.8248	45.1411	6.50777	17.3607	3.15307	46.2626	65.351		5.719	6.013	5.875	26.117	19.618	22.839	3.43641	5.82321	2.00781	55.7246
Ghana	GHA	2020	9.88729	7.83341	77.4676	85.301	66.5755	45.1882	0.513942	18.614	3.40916	47.3757	63.256		6.336	6.303	6.319	26.817	19.175	22.963	3.46871	5.84874	1.99182	56.2172
Ghana	GHA	2021	9.97109	8.00565	77.5553	85.5609	62.7078	45.322	5.07647	19.2005	3.4005	49.6508	62.068	56.394	5.923	6.038	5.985	27.146	18.415	22.745	3.50669	5.882	1.95905	56.6953
Ghana	GHA	2022	31.2559	6.65253	77.727	84.3795	70.1155	42.776	3.80485	20.4456	2.90964	45.9717	60.867	59.766	5.334	5.46	5.402	29.911	25.333	27.604	3.5615	5.94482	1.92029	57.2506
Ghana	GHA	2023	38.107	5.49934	85.2301	90.7295	64.3879	43.1128	3.14009	22.0958		46.3574	60.877		5.286	5.408	5.352	29.71	25.12	27.398	3.63181	6.03399	1.9086	57.8075
Ghana	GHA	2024	22.8483	4.85939	83.9642	88.8236	69.7884	40.9369	5.59045			46.9339	60.928		5.276	5.408	5.347	29.791	25.14	27.448	3.70833	6.13216	1.875	58.3655
Ghana	GHA	2025										47.1708	60.432		5.736	5.904	5.826	29.872	25.161	27.5
Gibraltar	GIB	2005																			15.8194	24.1569	1.54811	100
Gibraltar	GIB	2006																			15.7363	23.9841	1.46709	100
Gibraltar	GIB	2007																			15.5066	23.5	1.38257	100
Gibraltar	GIB	2008																			15.2848	23.0525	1.34728	100
Gibraltar	GIB	2009																			15.2321	22.9293	1.3391	100
Gibraltar	GIB	2010																			15.5802	23.5673	1.36942	100
Gibraltar	GIB	2011																			16.0376	24.4064	1.30987	100
Gibraltar	GIB	2012																			16.3711	25.006	1.15877	100
Gibraltar	GIB	2013																			16.7122	25.6403	1.17327	100
Gibraltar	GIB	2014																			17.0207	26.2502	1.24503	100
Gibraltar	GIB	2015																			17.3292	26.8584	1.15142	100
Gibraltar	GIB	2016																			17.5231	27.2375	1.39118	100
Gibraltar	GIB	2017																			17.5488	27.3008	1.72898	100
Gibraltar	GIB	2018																			17.5131	27.2354	1.76273	100
Gibraltar	GIB	2019																			17.4607	27.1144	1.81958	100
Gibraltar	GIB	2020																			17.4246	27.0086	1.89493	100
Gibraltar	GIB	2021																			17.3284	26.8226	1.87597	100
Gibraltar	GIB	2022																			17.3374	26.818	2.01707	100
Gibraltar	GIB	2023																			17.4705	26.9865	2.26613	100
Gibraltar	GIB	2024																			17.6155	27.2102	2.20574	100
Greece	GRC	2005	3.54507	20.4796	67.6748	86.2025	50.3555	66.6372	1.18351	90.3475	4.05491	65.797	65.404	80.927	34.831	18.943	25.811	17.573	10.424	13.847	18.3248	27.4832	0.293249	74.2617
Greece	GRC	2006	3.19595	20.4906	65.2621	83.2646	51.1047	64.6337	6.4434	95.0775		66.4589	65.815	81.31	34.766	17.193	24.658	17.122	9.829	13.328	18.4893	27.7276	0.300332	74.7178
Greece	GRC	2007	2.895	20.8256	65.7972	84.3586	54.5257	66.1367	3.50687	90.5404		66.4323	65.71	80.592	32.291	15.665	22.731	16.629	9.731	13.051	18.6048	27.8927	0.254758	75.1753
Greece	GRC	2008	4.1528	21.0036	68.2928	86.6897	57.1053	68.6335	0.057474			66.9736	65.876	79.997	28.379	16.776	21.61	15.905	10.469	13.097	18.7114	28.0725	0.265458	75.6151
Greece	GRC	2009	1.21007	23.6285	69.0664	89.9995	46.378	70.2505	-4.11928			67.5911	66.573	80.24	33.516	19.336	25.469	16.417	10.681	13.467	18.883	28.4027	0.263026	76.0175
Greece	GRC	2010	4.71299	22.4103	67.4184	89.2491	50.9225	70.2153	-5.69374	101.694		68.3766	67.114	79.428	40.893	26.856	33.005	17.957	13.682	15.767	19.1579	28.9355	0.12888	76.3631
Greece	GRC	2011	3.32985	22.0783	69.6702	91.6063	56.293	70.2096	-9.87678	105.813		70.4077	66.592	77.902	52.259	39.087	44.951	19.867	16.821	18.311	19.5074	29.6262	-0.147951	76.6353
Greece	GRC	2012	1.50153	22.5578	71.1548	92.202	62.3942	69.8752	-8.33113	110.123		70.9719	66.846	77.217	63.541	49.116	55.656	22.331	19.984	21.134	19.8891	30.3927	-0.540753	76.868
Greece	GRC	2013	-0.921269	20.9298	70.4881	90.1874	62.9547	70.1766	-2.27212	112.706		71.1755	66.842	76.955	64.309	53.989	58.491	21.007	21.473	21.244	20.2915	31.1946	-0.725121	77.0952
Greece	GRC	2014	-1.31226	20.7227	69.533	89.2667	66.4335	70.5563	0.792225	119.104		71.8139	66.725	74.918	58.765	47.518	52.645	20.429	19.329	19.869	20.6971	31.9815	-0.666113	77.313
Greece	GRC	2015	-1.73589	20.768	68.6887	88.8906	65.2716	70.0009	-0.228302		3.6824	72.4497	66.982	76.004	55.027	45.273	49.731	17.888	17.903	17.896	21.0795	32.7138	-0.658861	77.5194
Greece	GRC	2016	-0.825654	20.6181	68.0127	88.8308	63.6575	69.3774	-0.0317948	131.403		72.708	67.179	75.885	50.724	44.326	47.223	16.181	16.294	16.239	21.3989	33.3505	-0.415913	77.7123
Greece	GRC	2017	1.12125	20.4384	68.81	89.4357	70.8825	69.9649	1.47312	135.334	3.46778	72.8089	67.181	75.597	48.441	38.993	43.392	16.194	15.592	15.885	21.6563	33.8785	-0.197783	77.8895
Greece	GRC	2018	0.625621	19.6597	68.833	89.0232	79.238	69.5166	2.06467	140.95	3.57627	72.7434	67.027	75.779	44.472	36.491	40.011	14.617	14.754	14.688	21.8966	34.3558	-0.20288	78.0491
Greece	GRC	2019	0.253008	19.9791	68.3649	89.3699	80.5901	69.722	2.27718	143.963	3.55062	73.5304	67.176	75.71	37.356	32.617	34.754	13.122	12.844	12.977	22.1274	34.8041	-0.105339	78.1888
Greece	GRC	2020	-1.24798	22.7275	69.148	93.8519	70.2937	69.6621	-9.19623	143.693		74.6934	66.197	74.39	38.561	30.054	33.74	13.648	13.422	13.53	22.3934	35.3007	-0.214592	78.3067
Greece	GRC	2021	1.22383	21.4974	67.0717	90.0089	88.0127	68.933	8.6545	150.605		73.3614	66.821	73.747	41.146	31.036	35.39	12.024	12.07	12.048	22.839	36.1729	-1.2168	78.3885
Greece	GRC	2022	9.64526	20.0673	68.3433	90.8492	108.122	67.719	5.52199	166.666	3.37548	73.2852	69.138	74.636	39.223	25.175	31.29	12.083	10.685	11.352	23.2282	36.9149	-1.25989	78.5502
Greece	GRC	2023	3.4648	19.3307	67.0517	88.6252	92.4711	68.6654	2.13591	165.113		72.5714	69.239	74.566	29.469	24.228	26.543	12.374	12.625	12.505	23.483	37.316	-0.28335	78.7746
Greece	GRC	2024	2.74149			87.2606	89.7765	68.0105	2.08657			72.6567	70.146	74.319	24.117	20.986	22.375	10.063	10.768	10.43	23.9398	38.0959	-0.0213045	78.9968
Greece	GRC	2025										73.007	69.988		25.008	18.484	21.389	10.081	10.768	10.438
Greenland	GRL	2005		45.8501	47.5782	93.4283	99.7079	63.7279	4.98749												5.63482	8.10449	0.0650075	82.6899
Greenland	GRL	2006		45.3577	45.5916	90.9493	89.6939	63.8976	5.55569												5.90603	8.45799	-0.281418	82.8472
Greenland	GRL	2007		46.104	45.9603	92.0644	94.9671	65.4185	2.35244												6.17801	8.81411	-0.388247	83.204
Greenland	GRL	2008		47.9879	45.1286	93.1165	107.373	63.5766	6.16613												6.43829	9.15955	-0.402187	83.6218
Greenland	GRL	2009		48.5991	43.4836	92.0828	85.7574	67.2899	0.865952												6.66295	9.45697	-0.00887697	83.8556
Greenland	GRL	2010		46.8149	43.1915	90.0064	110.472	65.6201	1.73583												6.8569	9.70286	0.373925	84.2785
Greenland	GRL	2011		46.6899	43.8527	90.5427	130.548	64.4597	-0.496519												7.05469	9.95214	0.627735	84.5286
Greenland	GRL	2012		45.7771	42.5052	88.2823	100.978	61.6479	1.39419												7.24664	10.202	-0.140721	84.8865
Greenland	GRL	2013		47.853	42.5618	90.4148	95.9117	63.904	-1.29828												7.41157	10.4179	-0.577266	85.3726
Greenland	GRL	2014		45.8404	41.7046	87.545	87.0886	63.5553	4.74214												7.54366	10.5982	-0.333399	85.6772
Greenland	GRL	2015		44.1988	39.7126	83.9114	83.1014	62.9358	-2.52932												7.71675	10.8418	-0.322039	86.0463
Greenland	GRL	2016		42.3438	37.4671	79.8109	85.8377	60.4317	4.68195												7.95294	11.1812	0.128228	86.2261
Greenland	GRL	2017		42.4119	36.7956	79.2075	84.2073	60.5468	0.0527282												8.18337	11.523	-0.0249203	86.3916
Greenland	GRL	2018		43.1424	35.984	79.1264	89.7767	59.3607	0.623065												8.38542	11.8349	-0.265609	86.7251
Greenland	GRL	2019		43.7935	35.0428	78.8363	92.1908	60.5341	2.83218												8.58444	12.1621	0.359918	87.0218
Greenland	GRL	2020		43.6149	34.0977	77.7126	82.6595	59.912	0.25079												8.84459	12.5833	0.252238	87.2841
Greenland	GRL	2021		44.2578	34.2066	78.4644	83.6839	62.142	1.63409												9.18605	13.1278	0.506106	87.5452
Greenland	GRL	2022		41.2837	32.661	73.9447	93.3651	60.5391	2.00456												9.57841	13.758	0.0141201	87.8049
Greenland	GRL	2023		41.7101	32.5871	74.2972	91.8901	60.9877	0.865962												10.1194	14.6483	0.359389	88.0631
Greenland	GRL	2024																			10.8087	15.8044	-0.051011	88.3195
Grenada	GRD	2005	3.47581					61.5603	13.2762												9.19401	14.5582	0.375245	35.9158
Grenada	GRD	2006	4.25195					63.8382	-3.99533												9.29954	14.5326	0.364763	35.912
Grenada	GRD	2007	3.85883					64.9869	6.12345												9.38822	14.5042	0.350771	35.9062
Grenada	GRD	2008	8.03327					66.6832	0.947543												9.46743	14.4848	0.337823	35.8983
Grenada	GRD	2009	-0.308655					69.603	-6.61328	56.8551											9.54393	14.4813	0.322305	35.8878
Grenada	GRD	2010	3.43651					68.3659	-0.511146		5.07508										9.63562	14.5205	0.297972	35.8743
Grenada	GRD	2011	3.03347					69.1453	0.764774		5.48532										9.71368	14.5686	0.440839	35.8601
Grenada	GRD	2012	2.41078					70.4669	-1.15484		5.07226										9.77216	14.6084	0.61907	35.8653
Grenada	GRD	2013	-0.0439998					69.7398	2.3511												9.85179	14.6821	0.629361	35.8792
Grenada	GRD	2014	-0.983603					68.276	7.34212		4.47757										9.95212	14.7844	0.566738	35.9015
Grenada	GRD	2015	-0.515448					66.7628	6.44522	96.7931	4.23861										10.0671	14.8999	0.475509	35.9319
Grenada	GRD	2016	1.65039					66.9324	3.7396	96.7951											10.2037	15.0649	0.395116	35.9706
Grenada	GRD	2017	0.908458					67.0222	4.43868	98.6993	3.1738										10.3636	15.2761	0.267166	36.0173
Grenada	GRD	2018	0.804102					66.0254	4.36144	99.9892	3.55919			77.394							10.5475	15.5192	0.218925	36.072
Grenada	GRD	2019	0.59815					66.865	0.676512					77.911							10.7582	15.8127	0.250354	36.1346
Grenada	GRD	2020	-0.740733					66.8126	-13.7566					69.875							10.9858	16.1287	0.309915	36.2051
Grenada	GRD	2021	1.21951					65.2545	4.69772		4.0903			74.547							11.2279	16.4627	0.297817	36.2832
Grenada	GRD	2022	2.58054					64.3445	7.31024		4.03767										11.5214	16.8791	0.192636	36.3689
Grenada	GRD	2023	2.69612					65.0689	4.52657		5.12545			78.644							11.8704	17.384	0.143593	36.4621
Grenada	GRD	2024	1.08615					65.7101	3.96333												12.2394	17.9145	0.10756	36.5628
Guam	GUM	2005			57.7736		66.4372		3.64232			75.4481	64.915		18.754	13.954	16.277	19.033	10.906	14.849	6.08339	9.41978	0.338234	93.79
Guam	GUM	2006			58.0227		72.7702		-3.65252			75.7898	66.641		18.579	15.674	17.017	19.497	11.553	15.376	6.17785	9.52822	0.287968	93.8895
Guam	GUM	2007			57.9713		79.4633		0.717213			76.0006	61.393		24.677	15.703	19.763	22.408	13.151	17.571	6.24232	9.58651	0.259311	93.9711
Guam	GUM	2008			59.6608		78.2739		2.03459			76.1829	63.49		25.402	17.618	21.008	22.87	13.677	18.041	6.29809	9.63225	0.257433	94.0314
Guam	GUM	2009			58.9685		72.0174		0.438684			76.4759	65.572		25.743	19.276	21.991	23.336	14.183	18.511	6.37227	9.71976	0.289274	94.0673
Guam	GUM	2010			57.7895		72.0348		2.26325			76.6592	65.387		23.683	15.842	19.48	21.954	13.574	17.539	6.55231	9.97769	0.209802	94.0765
Guam	GUM	2011			59.1894		77.7889		0.0776548			76.9067	66.828		39.936	24.821	31.963	27.378	16.492	21.663	6.8709	10.4507	0.0126102	94.0771
Guam	GUM	2012			60.8927		76.7521		2.13385			77.1121	66.989		29.237	28.04	28.608	23.683	17.542	20.47	7.25904	11.0373	-0.127376	94.0777
Guam	GUM	2013			59.6036		79.5332		1.69041			77.3359	67.179		27.68	26.506	27.064	23.094	16.941	19.882	7.67534	11.6778	-0.219683	94.0783
Guam	GUM	2014			58.1105		78.3601		1.79305			77.5297	67.378		18.435	17.603	17.999	19.512	13.735	16.499	8.10824	12.3598	-0.289635	94.0787
Guam	GUM	2015			56.6822		71.3399		0.825688			77.7485	67.613		16.828	16.02	16.405	18.726	13.043	15.76	8.54676	13.0683	-0.351705	94.0791
Guam	GUM	2016			57.3462		70.4118		0.181984			77.9785	67.87		13.244	12.567	12.889	17.285	11.764	14.399	8.98477	13.7958	-0.40834	94.0795
Guam	GUM	2017			59.0221		69.2666		0.8901			78.1885	68.115		13.386	12.649	12.999	16.883	11.625	14.128	9.42749	14.5526	-0.453432	94.0797
Guam	GUM	2018			59.5604		72.9631		-0.828232			78.4098	68.422		13.531	12.757	13.125	16.082	11.285	13.565	9.87647	15.3431	-0.497289	94.0799
Guam	GUM	2019			57.2148		78.0645		2.5236			78.5621	68.635		13.57	12.732	13.131	15.648	11.117	13.27	10.3311	16.1657	-0.536849	94.08
Guam	GUM	2020			60.2941		63.6748		-10.5189			78.9568	65.543		16.148	14.725	15.401	17.442	13.237	15.24	10.7713	16.9896	0.216072	94.0805
Guam	GUM	2021			61.4052		61.8383		2.05818			78.696	66.338		14.891	13.855	14.353	15.991	12.112	13.969	11.1937	17.7992	0.964756	94.0884
Guam	GUM	2022			59.9132		71.8669		5.09986			78.7392	69.463		13.47	12.621	13.032	14.233	10.398	12.242	11.6412	18.6644	0.881706	94.1068
Guam	GUM	2023										78.8652	69.836		13.268	12.455	12.852	13.807	10.082	11.881	12.1169	19.5862	0.799556	94.1349
Guam	GUM	2024										79.0369	70.197		13.297	12.471	12.876	13.792	10.024	11.851	12.6021	20.5192	0.760437	94.1726
Guam	GUM	2025										79.1833	70.525		14.251	13.386	13.813	14.09	10.265	12.126
Guatemala	GTM	2005	9.10865	8.61353	89.1266	97.7401	67.1037	56.2419	3.27603			43.1234	63.915		7.202	4.527	5.353	43.655	5.648	24.446	3.78119	6.98234	2.16441	48.0558
Guatemala	GTM	2006	6.56085	8.50697	89.1972	97.7041	67.9119	56.7249	5.3514		3.03285	43.2807	63.48	86.082	6.857	4.397	5.161	43.708	5.779	24.531	3.79307	6.94125	2.11559	48.7676
Guatemala	GTM	2007	6.82162	8.79869	88.6964	97.4951	69.0014	57.0136	6.33772	17.2978	3.08809	43.5979	63.044		6.51	4.254	4.961	44.062	6.844	25.24	3.81086	6.90859	2.10656	49.4565
Guatemala	GTM	2008	11.3558	9.16135	90.74	99.9014	65.1787	58.0395	3.29352		3.23686	43.9381	62.608		6.383	4.269	4.937	44.528	8.088	26.098	3.83554	6.8862	2.05272	50.1166
Guatemala	GTM	2009	1.8591	10.3456	87.3296	97.6752	58.0407	58.9373	0.476898	15.0973		44.177	62.172		6.552	4.508	5.16	45.042	9.513	27.075	3.86545	6.87134	1.99246	50.742
Guatemala	GTM	2010	3.85951	10.6462	87.4903	98.1365	63.1252	59.4696	2.88418	15.7523	2.84865	44.4915	61.734	87.561	6.615	4.67	5.296	45.366	10.742	27.862	3.89839	6.86071	1.98156	51.327
Guatemala	GTM	2011	6.21412	10.3585	86.7321	97.0906	65.0471	58.9769	4.16391	16.4344	2.96865	42.6905	62.909	85.821	6.462	4.269	4.991	42.888	7.712	25.111	3.93468	6.85618	1.99386	51.8657
Guatemala	GTM	2012	3.78181	10.5135	87.3196	97.8331	61.9594	59.5279	2.97471	16.8754	3.00525	48.3776	66.9	87.251	6.394	3.727	4.618	40.019	6.154	22.909	3.97675	6.86377	1.99139	52.3523
Guatemala	GTM	2013	4.34337	11.288	85.5584	96.8463	56.6852	60.8392	3.69482	19.5737	2.88809	48.684	61.882	85.845	5.8	5.377	5.512	45.772	9.907	27.654	4.02901	6.89115	1.9536	52.781
Guatemala	GTM	2014	3.41836	11.2554	85.268	96.5234	55.0833	60.8986	4.44398	18.2553	2.98562	49.0079	62.304	79.639	8.228	4.535	5.691	45.898	8.289	26.901	4.0897	6.93561	1.89511	53.1458
Guatemala	GTM	2015	2.38872	11.0881	84.3174	95.4055	49.8935	61.449	4.09217	21.9574	3.03033	49.2297	62.294	85.211	9.683	3.829	5.581	47.01	6.728	26.664	4.15189	6.98549	1.83251	53.4411
Guatemala	GTM	2016	4.44844	10.4404	84.5642	95.0046	46.3727	61.8868	2.6778		2.94474	49.6096	62.407	82.561	8.084	4.428	5.582	46.719	8.507	27.42	4.216	7.03884	1.84256	53.6609
Guatemala	GTM	2017	4.42454	10.5728	84.9104	95.4832	46.0694	62.4741	3.07985		2.9501	49.2177	62.563	82.1	7.927	3.71	4.939	47.695	7.234	27.263	4.28939	7.10842	1.81876	53.7995
Guatemala	GTM	2018	3.75186	11.1203	85.7624	96.8826	47.0117	63.059	3.40687		3.13194	47.9836	62.198	81.981	6.685	3.784	4.679	46.861	9.095	27.79	4.37433	7.19928	1.66602	53.846
Guatemala	GTM	2019	3.69998	11.107	84.8559	95.9629	45.5167	62.5226	4.0179	22.5595	3.19297	49.8605	60.969	81.434	5.574	3.969	4.461	46.98	9.764	28.185	4.46875	7.30418	1.52063	54.1882
Guatemala	GTM	2020	3.21444	11.472	83.4809	94.9528	41.1408	62.0283	-1.78555		3.29485	49.053	60.598		6.773	4.421	5.157	47.641	11.035	29.152	4.54512	7.37243	1.47138	54.5483
Guatemala	GTM	2021	4.26105	11.2204	86.0132	97.2336	49.2611	61.9595	8.0417		3.09106	48.7585	64.938	84.594	5.383	3.029	3.789	41.909	10.688	26.139	4.57681	7.36332	1.38076	54.9047
Guatemala	GTM	2022	6.88513	11.4857	88.4858	99.9715	54.431	61.7429	4.18452		3.20823	50.8458	62.055	81.226	10.154	4.432	6.274	46.047	13.391	29.552	4.62989	7.38937	1.40624	55.2581
Guatemala	GTM	2023	6.20658	11.2417	87.3674	98.6092	48.2971	61.4032	3.53316	27.2949	3.10634	47.6772	61.614	86.237	4.578	4.211	4.326	40.129	7.849	23.824	4.73474	7.50028	1.53987	55.6082
Guatemala	GTM	2024	2.86993	10.8985	87.9763	98.8748	47.3442	61.8399	3.65186			48.0196	61.812	87.259	4.8	4.543	4.624	40.321	7.888	23.94	4.84933	7.62791	1.54129	55.9547
Guatemala	GTM	2025										48.2345	61.781		5.505	4.423	4.764	40.512	7.927	24.055
Guinea	GIN	2005	31.3733	4.79247	50.6166	55.4091	47.9377	25.9855	2.99727	3.08171	1.26815	26.3719	64.193		4.925	6.931	5.831	34.538	12.46	23.495	3.82687	7.52394	2.00042	32.3963
Guinea	GIN	2006	34.6953	6.27444	90.8998	97.1743	69.3863	44.9064	1.1896	5.37416		26.8652	63.448		4.984	6.915	5.863	34.85	12.275	23.552	3.79216	7.44249	2.09059	32.6868
Guinea	GIN	2007	18.1756	6.77831	93.8211	100.599	71.121	45.5641	6.81747	8.27205		28.0171	62.697		4.958	6.783	5.796	35.118	12.013	23.539	3.75761	7.34672	2.31497	32.974
Guinea	GIN	2008	23.0656	5.96892	88.7167	94.6856	64.1842	43.7135	4.13302	9.3256	1.58112	28.8071	61.942		4.995	6.739	5.803	35.502	12.037	23.723	3.72218	7.24383	2.41909	33.2571
Guinea	GIN	2009	4.68439	9.9647	93.5124	103.477	69.8153	44.2803	-1.12264	9.34879	2.20725	29.1907	61.186		5.098	6.784	5.886	36.001	12.193	24.035	3.68756	7.14285	2.44158	33.5352
Guinea	GIN	2010	15.0503	12.5682	79.9706	92.5388	73.5466	43.4042	4.81336	10.544	2.55119	30.1015	60.429		5.199	6.822	5.963	36.359	12.146	24.175	3.65047	7.03769	2.45929	33.8075
Guinea	GIN	2011	21.3169	14.9816	81.7153	96.6969	85.9547	43.8765	5.61211	10.6185	2.28742	31.3078	59.671		5.233	6.773	5.964	36.707	12.229	24.377	3.61269	6.92916	2.47697	34.0732
Guinea	GIN	2012	15.2263	14.4755	79.9025	94.378	86.6743	42.223	5.91529	10.0086	1.83371	32.3092	58.914		5.161	6.588	5.844	37.075	12.357	24.614	3.58154	6.8327	2.45416	34.3314
Guinea	GIN	2013	11.8876	18.8734	85.1178	103.991	80.4264	43.5254	3.94569	10.4364	2.63421	33.3374	58.161		5.243	6.6	5.898	37.33	12.426	24.768	3.55677	6.75226	2.44471	34.5813
Guinea	GIN	2014	6.15051	17.7931	82.7852	100.578	76.772	43.3534	3.69655	10.8547	2.42281	34.1953	57.408	83.885	5.347	6.637	5.974	37.583	12.424	24.885	3.53118	6.67156	2.48019	34.8178
Guinea	GIN	2015	11.7801	19.5019	85.7837	105.286	72.4427	45.5062	3.82591		2.51714	34.7261	56.656		5.93	6.615	6.266	39.042	15.292	27.047	3.50837	6.59554	2.53151	35.0373
Guinea	GIN	2016	8.17268	16.8835	83.5431	100.427	111.839	41.9293	10.8206		2.5445	35.7571	55.908		6.316	6.386	6.35	39.989	17.753	28.753	3.492	6.53434	2.56691	35.31
Guinea	GIN	2017	8.91436	15.276	74.3846	89.6606	101.252	37.9415	10.3		2.32034	36.5927	55.161		6.695	6.175	6.436	40.893	20.279	30.472	3.4777	6.48054	2.55652	35.5827
Guinea	GIN	2018	9.82762	15.4819	73.5407	89.0226	88.9841	35.0739	6.35849		2.38432	37.2402	54.416		7.17	6.063	6.616	41.95	22.911	32.323	3.46579	6.43145	2.54386	35.8554
Guinea	GIN	2019	9.47001	15.4023	73.2003	88.6027	78.4153	35.2028	5.61691		1.85813	37.5597	53.671	79.511	7.869	6.122	6.988	43.033	25.768	34.301	3.45692	6.38551	2.561	36.1282
Guinea	GIN	2020	10.6016	17.4132	72.896	90.3092	115.765	36.7568	4.70459		2.44806	36.2099	53.164		9.675	7.173	8.414	43.301	26.056	34.578	3.44434	6.33023	2.5514	36.4802
Guinea	GIN	2021	12.5973	17.482	69.2	86.682	115.196	36.168	5.58233		2.04075	36.1674	53.414		9.06	6.898	7.976	42.929	25.697	34.212	3.43128	6.27303	2.5061	36.8502
Guinea	GIN	2022	10.493	17.1208	72.1929	89.3137	94.1653	37.5197	3.97241		2.00722	36.6306	53.706		8.002	6.174	7.095	42.614	25.482	33.947	3.43104	6.23835	2.4825	37.2385
Guinea	GIN	2023	7.80498	13.4916	70.6468	84.1384	95.8295	37.215	5.54173		1.72471	37.0172	53.746		7.966	6.145	7.071	42.461	25.373	33.817	3.44106	6.22073	2.46199	37.6454
Guinea	GIN	2024	8.12314	13.8724	69.0165	82.8889	97.7778	36.3402	5.35005			37.7281	53.767		7.956	6.136	7.068	42.575	25.35	33.862	3.45512	6.20936	2.39596	38.0713
Guinea	GIN	2025										38.4901	53.58		7.728	6.269	7.017	42.689	25.33	33.909
Guinea-Bissau	GNB	2005	3.3292	15.754	84.6519	100.406	45.7842	39.0351	6.55977	2.26421		26.2933	63.173		3.756	3.953	3.862	24.709	14.361	19.526	3.1195	5.88402	2.34506	38.3801
Guinea-Bissau	GNB	2006	1.95474	15.9539	91.9723	107.926	48.7605	39.4737	2.6665	2.62031		26.4523	63.159		3.731	3.924	3.834	24.604	14.316	19.45	3.0455	5.7243	2.41123	38.6871
Guinea-Bissau	GNB	2007	4.61744	16.3953	83.336	99.7313	46.2445	40.3321	2.55983			26.5341	63.142		3.722	3.913	3.824	24.702	14.394	19.537	2.97973	5.58155	2.48997	39.0031
Guinea-Bissau	GNB	2008	10.4601	14.2402	90.0265	104.267	45.1389	41.5344	4.52458			26.6183	63.129		3.75	3.94	3.851	24.827	14.466	19.635	2.92257	5.45475	2.52259	39.3321
Guinea-Bissau	GNB	2009	-1.6514	16.9575	86.0167	102.974	43.5957	40.0697	2.44795			26.8066	63.099		3.758	3.946	3.859	24.958	14.583	19.758	2.87567	5.34698	2.54277	39.6716
Guinea-Bissau	GNB	2010	2.51785	16.3831	82.3591	98.7421	43.5146	40.7971	5.60536		1.68221	27.0616	63.08		3.734	3.918	3.832	25.088	14.638	19.85	2.83925	5.25959	2.58492	40.0096
Guinea-Bissau	GNB	2011	5.0461	15.8359	78.3396	94.1756	48.6175	42.2691	8.08504		1.76593	27.5452	63.071		3.704	3.883	3.8	25.221	14.648	19.921	2.81252	5.19171	2.62923	40.4391
Guinea-Bissau	GNB	2012	2.13055	15.3242	81.2161	96.5402	44.1281	41.7821	-1.71287		1.88638	27.1807	63.013		3.754	3.933	3.849	25.393	14.888	20.125	2.79669	5.14532	2.65953	40.8686
Guinea-Bissau	GNB	2013	1.20713	15.1049	79.1935	94.2984	39.9575	41.9268	3.25607		2.01027	27.3751	62.974		3.785	3.963	3.88	25.574	15.037	20.288	2.79235	5.12025	2.66229	41.2976
Guinea-Bissau	GNB	2014	-1.50924	17.42	75.9214	93.3415	46.8697	43.7616	0.964526			27.4407	62.919		3.867	4.045	3.962	25.789	15.268	20.509	2.79989	5.11625	2.62731	41.7272
Guinea-Bissau	GNB	2015	1.47672	16.4379	72.8645	89.3024	54.3704	45.1099	6.13409			27.5813	62.878		3.792	3.964	3.884	25.969	15.361	20.645	2.81952	5.13236	2.57046	42.1568
Guinea-Bissau	GNB	2016	1.50312	16.5063	72.5735	89.0798	54.3007	45.4264	5.43268			27.9554	62.825		3.778	3.945	3.867	26.209	15.529	20.847	2.84981	5.16536	2.51155	42.5861
Guinea-Bissau	GNB	2017	1.69111	16.7288	68.9955	85.7243	56.9137	45.0833	4.66368			28.1264	62.758		3.749	3.911	3.835	26.47	15.737	21.08	2.88897	5.21063	2.43633	43.0156
Guinea-Bissau	GNB	2018	0.381325	16.644	68.8701	85.5141	55.0196	44.9474	3.76145			28.2849	62.674	93.608	3.784	3.942	3.868	26.788	16.028	21.383	2.93416	5.26247	2.37406	43.4449
Guinea-Bissau	GNB	2019	0.2466	18.6976	72.029	90.7266	49.9435	47.5435	5.3275			26.4389	63.755	80.454	2.171	1.971	2.063	24.737	12.886	18.782	2.98298	5.31839	2.34096	43.8746
Guinea-Bissau	GNB	2020	1.14001	19.4483	66.8491	86.2974	42.8854	47.1604	2.8914			25.6224	63.828		2.52	2.912	2.733	22.292	13.019	17.631	3.01894	5.34898	2.28895	44.3038
Guinea-Bissau	GNB	2021	2.24249	18.5087	69.7916	88.3003	44.8095	43.0126	5.05056			26.3433	64.865		2.232	3.532	2.941	18.958	12.372	15.647	3.04676	5.36296	2.23904	44.7334
Guinea-Bissau	GNB	2022	9.39076	18.9279	74.7725	93.7004	45.7585	43.4576	5.52987			27.7275	65.741	80.986	1.793	3.7	2.835	15.204	11.221	13.201	3.09029	5.40214	2.24235	45.1627
Guinea-Bissau	GNB	2023	7.10221	15.9067	72.9896	88.8963	40.4745	42.1439	5.8275			28.1378	65.746		1.785	3.682	2.817	15.311	11.348	13.317	3.14256	5.45441	2.24529	45.5924
Guinea-Bissau	GNB	2024	3.76556	17.0514	73.1484	90.1998	38.8066	37.8848	4.14631			28.6152	65.746		1.792	3.699	2.826	15.435	11.478	13.443	3.19186	5.50109	2.20521	46.1132
Guinea-Bissau	GNB	2025										29.2145	65.83		1.944	3.602	2.844	15.662	11.504	13.569
Guyana	GUY	2005	6.92554	26.914	73.4062	100.32	194.351	37.9229	-1.95096	10.8724	8.13973	51.6377	59.406		28.951	18.741	22.205	51.065	32.338	41.695	4.096	6.75893	-0.197462	27.7759
Guyana	GUY	2006	6.67716					40.2662	5.12961	10.9943	3.11891	52.5129	59.445		27.856	17.929	21.355	50.837	32.113	41.475	4.17298	6.83155	-0.256336	27.4605
Guyana	GUY	2007	12.2002					40.5857	7.19124	11.1279	2.39117	53.4466	59.462		28.086	17.982	21.53	50.963	32.225	41.601	4.26109	6.91659	-0.277736	27.1459
Guyana	GUY	2008	8.10202					39.5225	1.75522	10.6149		53.6164	59.464		28.362	18.073	21.747	51.359	32.246	41.817	4.36267	7.02193	-0.298386	26.8574
Guyana	GUY	2009	2.9523					40.9797	3.61151	10.0791	2.15058	54.3342	59.449		28.825	18.3	22.12	51.461	32.733	42.117	4.47876	7.14821	-0.333444	26.6201
Guyana	GUY	2010	3.73338					41.5646	4.13844	10.9517	2.40939	55.0489	59.419		29.338	18.56	22.536	51.399	32.99	42.218	4.61337	7.30225	-0.37806	26.4592
Guyana	GUY	2011	4.97774					42.7998	5.19625	11.2687	2.50669	56.0183	59.38		29.563	18.621	22.721	51.419	33.007	42.238	4.76946	7.49167	-0.415004	26.4
Guyana	GUY	2012	2.39194					43.0017	5.27633	11.7028	2.24132	56.7362	59.292		29.854	18.711	22.956	51.567	33.088	42.363	4.91177	7.67329	0.0180912	26.4
Guyana	GUY	2013	1.90125					42.959	3.65338			57.3426	59.165		30.237	18.843	23.258	51.724	33.258	42.542	5.03399	7.83941	0.498962	26.4004
Guyana	GUY	2014	0.85263					44.7833	1.68649		4.36033	57.6729	59.057		30.801	19.079	23.693	51.902	33.454	42.735	5.16799	8.0311	0.559483	26.4018
Guyana	GUY	2015	-1.00173					44.105	0.687405		3.8957	57.8945	58.978		31.485	19.37	24.21	52.059	33.631	42.902	5.31234	8.24699	0.601716	26.4044
Guyana	GUY	2016	0.836008					44.302	3.80746		4.73775	58.3306	58.936		32.029	19.54	24.598	52.084	33.682	42.936	5.4639	8.48312	0.626279	26.4081
Guyana	GUY	2017	1.90466					44.323	3.73449		4.66478	58.7443	58.925		32.55	19.669	24.956	52.041	33.667	42.898	5.62384	8.74145	0.643725	26.4129
Guyana	GUY	2018	1.28284					45.9542	4.44091		4.45058	59.145	59.112	78.469	33.073	19.808	25.254	52.137	33.841	42.926	5.68356	8.76996	2.95874	26.4188
Guyana	GUY	2019	2.08723					44.7133	5.35284			60.2761	55.26	79.312	32.305	22.083	26.304	53.025	38.486	45.662	5.79882	8.92855	2.01467	26.4259
Guyana	GUY	2020	0.993337					38.92	43.4797			59.8918	54.001		38.276	25.88	30.998	53.927	39.429	46.614	6.00113	9.29944	-0.0227843	26.434
Guyana	GUY	2021	5.03286					30.8441	20.06			60.5864	54.5		35.926	24.33	29.122	52.991	38.481	45.659	6.08125	9.4316	0.985982	26.4433
Guyana	GUY	2022	6.11506					19.2698	63.3346			59.3934	57.685		29.937	20.308	24.566	50.48	36.21	43.253	6.22246	9.66602	0.751934	26.4537
Guyana	GUY	2023	2.8211					18.7672	33.795	25.1521		58.5116	58.606		29.988	20.349	24.705	49.884	35.757	42.715	6.47956	10.0932	0.572335	26.4651
Guyana	GUY	2024	2.90395					14.4608	43.8193	26.4316		56.9883	59.26		29.955	20.322	24.742	50.054	35.883	42.853	6.73492	10.5062	0.571244	26.4777
Guyana	GUY	2025										56.692	59.244		30.175	20.406	24.896	50.218	36.006	42.992
Haiti	HTI	2005	13.973	6.59831	101.337	107.935	34.9651	54.2964	3.07217			39.7931	64.877		40.42	30.086	34.803	27.424	15.026	21.209	3.73856	6.46181	1.68059	42.5792
Haiti	HTI	2006	11.3452	6.84319	97.8184	104.662	37.0571	52.6501	1.76875			40.0692	65.244		44.036	32.853	37.961	28.279	15.786	22.018	3.77793	6.48168	1.69925	43.2846
Haiti	HTI	2007	6.55723	7.67562	100.495	108.171	34.2825	52.1017	4.70653			40.5092	65.618		46.91	35.088	40.519	28.861	16.313	22.573	3.81829	6.50498	1.68627	43.9866
Haiti	HTI	2008	15.2818	8.14406	97.8011	105.945	36.145	51.1603	2.65803			40.8862	65.989		45.954	33.457	39.205	28.664	15.905	22.272	3.86006	6.53284	1.66611	44.6847
Haiti	HTI	2009	0.393886	6.98508	95.6722	102.657	33.0965	51.6516	5.89038			41.4419	66.366		44.53	31.549	37.562	28.24	15.331	21.774	3.90232	6.56389	1.65253	45.3786
Haiti	HTI	2010	4.82734	7.27841	95.3142	102.593	44.7215	52.5004	-5.65151			41.6456	66.711		44.657	30.44	36.918	28.495	15.231	21.848	3.91456	6.54173	1.16673	46.068
Haiti	HTI	2011	6.33279	6.55241	96.4483	103.001	44.1636	51.234	5.09821			42.1101	66.863		43.326	28.574	35.353	28.07	14.667	21.351	3.92535	6.51805	1.13206	46.7524
Haiti	HTI	2012	5.01804	7.43954	95.9994	103.439	40.2582	51.0112	0.502424			42.4687	66.837	70.918	42.823	27.132	34.295	27.935	14.273	21.086	3.96632	6.54891	1.54989	47.4315
Haiti	HTI	2013	4.76502	7.19118	94.6014	101.793	40.3325	51.079	4.32478			43.0749	66.959		42.155	26.623	33.745	27.623	14.024	20.806	4.01343	6.58955	1.50397	48.1049
Haiti	HTI	2014	3.43817	7.664	96.1812	103.845	42.3515	51.8126	2.88877		1.75227	43.4889	67.03		42.614	26.88	34.092	27.573	13.976	20.757	4.0611	6.63113	1.46513	48.7724
Haiti	HTI	2015	6.73184	8.2578	96.0676	104.326	41.9457	52.4407	1.4		1.85498	43.9677	67.048		42.841	26.914	34.179	27.511	13.892	20.684	4.11117	6.67667	1.43574	49.4335
Haiti	HTI	2016	11.5029	8.20929	96.2524	104.462	41.4109	53.1971	1.81247		1.38776	44.4265	67.084		43.37	27.179	34.536	27.486	13.85	20.651	4.16856	6.73588	1.39863	50.0878
Haiti	HTI	2017	10.6801	7.89769	95.1113	103.009	42.0745	53.5224	2.51027		1.49847	44.857	67.151		43.701	27.322	34.752	27.385	13.756	20.553	4.2311	6.8061	1.36161	50.7351
Haiti	HTI	2018	12.4814	8.26343	98.9922	107.256	45.1386	53.4912	1.66781		1.63716	45.2345	67.189		43.986	27.407	34.896	27.3	13.663	20.464	4.29882	6.88547	1.32791	51.3749
Haiti	HTI	2019	18.7038	7.19135	96.604	103.795	44.5687	54.3641	-1.7231		1.08415	45.5271	67.096		44.688	27.677	35.247	27.413	13.688	20.532	4.37038	6.97061	1.29424	52.0069
Haiti	HTI	2020	22.7963	7.31206	97.0967	104.409	37.4139	53.9204	-3.30551		1.11354	44.1938	66.48		50.387	30.834	39.534	28.599	14.579	21.57	4.43421	7.04237	1.2411	52.6307
Haiti	HTI	2021	16.8415	7.44906	97.3201	104.769	37.0466	51.7414	-1.79824		1.24275	43.9234	66.983		47.943	29.573	37.806	28.114	14.298	21.186	4.48426	7.09055	1.15604	53.2461
Haiti	HTI	2022	33.9839	6.90414	99.2858	106.19	36.5296	48.1675	-1.68198		1.0269	43.9306	66.118		46.276	28.729	36.326	27.719	14.096	20.887	4.54072	7.14773	1.1279	53.8525
Haiti	HTI	2023	36.8135	6.21679	100.174	106.39	30.7854	47.5486	-1.86388		0.964648	44.2124	65.833		46.398	28.747	36.326	27.734	14.141	20.917	4.61815	7.23739	1.15633	54.4497
Haiti	HTI	2024	26.9491	5.68589	99.8211	105.507	22.2479	48.313	-4.16963			44.3827	65.327		47.112	29.165	36.758	27.934	14.369	21.131	4.70522	7.33974	1.15473	55.0373
Haiti	HTI	2025										44.585	65.312		47.892	29.967	37.518	28.138	14.644	21.37
Honduras	HND	2005	8.80906	15.5226	75.3323	90.8549	136.49	56.3969	6.0506			48.9095	62.805	91.884	12.892	6.911	8.732	44.091	10.465	27.019	2.96412	5.28621	2.42763	48.1704
Honduras	HND	2006	5.57775	15.0038	77.677	92.6808	133.132	56.9523	6.56724			47.9821	61.014	86.348	9.902	4.694	6.186	44.591	9.639	26.837	2.96962	5.24721	2.35855	48.779
Honduras	HND	2007	6.93621	16.6024	77.785	94.3874	135.071	58.3424	6.18833			49.3574	60.068	87.168	8.052	4.465	5.505	44.079	11.612	27.581	2.97926	5.21359	2.29768	49.3994
Honduras	HND	2008	11.4034	17.1148	79.9176	97.0324	135.749	59.6399	4.2316	17.5304		49.7088	60.711	90.482	8.782	4.198	5.521	42.868	9.464	25.887	2.99476	5.18904	2.24386	50.0312
Honduras	HND	2009	5.49634	18.6997	78.5451	97.2449	96.905	61.0644	-2.43163			49.8517	61.85	89.261	9.952	4.436	6	43.526	10.283	26.62	3.01774	5.17681	2.18879	50.674
Honduras	HND	2010	4.69889	17.9264	78.1178	96.0442	109.442	60.6354	3.73114	19.2758		50.6972	63.102	89.467	11.814	5.703	7.506	42.815	10.172	26.206	3.04945	5.17898	2.12597	51.3274
Honduras	HND	2011	6.76228	16.0644	77.6373	93.7016	122.217	58.2063	3.83569			51.1058	60.863	87.715	13.743	5.68	8.064	43.321	12.344	27.552	3.0914	5.19837	2.0668	51.9909
Honduras	HND	2012	5.19619	16.2018	78.6166	94.8184	121.188	58.6183	4.12869	18.9443	6.29973	49.2678	59.662	83.379	12.416	4.807	6.972	45.34	12.602	28.668	3.1481	5.24335	2.02251	52.6642
Honduras	HND	2013	5.1619	16.7338	81.929	98.6628	116.306	60.9736	2.79156	19.4477	5.87493	52.6742	63.902	88.862	15.58	7.249	9.823	43.002	11.218	26.81	3.22202	5.31752	1.97914	53.3564
Honduras	HND	2014	6.12925	15.3323	80.3336	95.666	112.975	60.1539	3.05808	19.7242	7.09012	54.7265	65.572	86.198	17.546	9.257	11.865	43.749	14.167	28.674	3.31527	5.4231	1.93678	53.8768
Honduras	HND	2015	3.15783	14.3052	77.5077	91.8129	107.264	58.8331	3.84008	20.3153	6.41297	55.2238	65.481	85.718	19.399	6.81	11.042	42.713	11.803	26.957	3.42269	5.55043	1.90365	54.3828
Honduras	HND	2016	2.72461	14.1139	76.8964	91.0104	99.8157	58.3804	3.89297	21.0025	6.09509	56.656	64.937	86.74	20.804	8.444	12.58	43.236	12.996	27.817	3.53529	5.68548	1.87757	54.8868
Honduras	HND	2017	3.93436	13.4984	77.3063	90.8047	101.813	56.8495	4.84291	24.5586	5.74434	53.4011	65.696	83.604	17.093	7.589	10.746	43.652	12.408	27.716	3.65147	5.82745	1.85008	55.3877
Honduras	HND	2018	4.34735	13.4623	80.6072	94.0695	103.551	57.339	3.84499	26.3838	6.05647	53.8674	68.072	86.308	15.779	7.723	10.49	42.387	11.607	26.681	3.76997	5.97566	1.82995	55.8853
Honduras	HND	2019	4.36587	13.879	82.1753	96.0543	99.46	58.072	2.55963	25.3231	5.98198	53.7969	64.755	83.443	17.503	7.724	10.774	44.296	12.579	28.106	3.88984	6.12853	1.81064	56.3792
Honduras	HND	2020	3.46841	15.6611	80.9231	96.5842	88.0009	58.9645	-8.96508		6.09801	52.8682	61.016		26.211	11.203	17.065	45.357	19.465	32.136	3.99409	6.25784	1.75456	56.8692
Honduras	HND	2021	4.48088	15.674	84.7369	100.411	103.373	58.0294	12.5653		5.8816	52.3454	62.725	84.298	18.581	11.535	14.269	42.362	21.911	31.916	4.07064	6.3451	1.66825	57.355
Honduras	HND	2022	9.08964	14.2761	87.2178	101.494	112.699	57.1227	4.14356		4.4828	54.3971	60.857	76.802	21.673	9.073	13.571	46.852	16.28	31.232	4.16665	6.46524	1.6768	57.8365
Honduras	HND	2023	6.66325	14.9293	86.9389	101.868	98.792	57.5718	3.57585		4.54962	55.2307	58.523	79.214	15.465	8.033	10.478	44.122	17.253	30.39	4.29272	6.63367	1.71477	58.3132
Honduras	HND	2024	4.60621	15.5274	85.9922	101.52	91.1102	58.409	3.55397			55.5887	58.706	81.527	11.999	6.474	8.301	44.964	17.157	30.75	4.41772	6.80056	1.68469	58.7851
Honduras	HND	2025										55.9399	58.723		12.421	6.608	8.526	45.088	17.158	30.808
Hong Kong SAR, China	HKG	2005	0.826446	9.24607	57.4775	66.7236	342.689	89.0585	7.38819	32.9855	4.13463	84.0157	69.866		7.898	13.747	10.671	8.26	9.724	8.97	12.3636	16.9026	0.436871	100
Hong Kong SAR, China	HKG	2006	2.00025	8.76954	57.7836	66.5532	359.209	89.9578	7.03268	33.7221	3.84279	84.3772	69.902		8.081	12.947	10.374	8.407	9.502	8.938	12.5486	17.0574	0.64227	100
Hong Kong SAR, China	HKG	2007	2.03503	8.41839	59.5102	67.9286	362.149	90.2904	6.46481	42.6143	3.45455	84.9849	70.042		7.183	11.037	8.973	7.235	8.072	7.641	12.6683	17.1435	0.859633	100
Hong Kong SAR, China	HKG	2008	4.30315	8.6687	60.1165	68.7852	376.657	87.8209	2.12792	55.8019	3.26063	85.6207	69.538		6.873	10.421	8.514	5.935	6.658	6.286	12.7828	17.2414	0.598239	100
Hong Kong SAR, China	HKG	2009	0.579441	9.19165	61.0889	70.2806	348.398	88.3971	-2.45915	56.5806	4.39213	85.857	69.484	75.86	10.09	15.155	12.49	6.971	7.871	7.41	12.9614	17.431	0.215353	100
Hong Kong SAR, China	HKG	2010	2.29289	8.85932	61.3756	70.2349	404.771	90.9132	6.76769	59.0326	3.51003	85.9806	68.237	76.127	10.271	14.07	12.097	6.596	7.326	6.954	13.1976	17.6975	0.734446	100
Hong Kong SAR, China	HKG	2011	5.30525	8.71146	63.2952	72.0067	421.855	91.5084	4.81471	60.2208	3.41822	85.9723	68.933	77.632	7.697	10.953	9.269	5.816	6.507	6.156	13.4869	18.0614	0.672543	100
Hong Kong SAR, China	HKG	2012	4.05391	9.09694	64.5523	73.6493	430.569	91.9216	1.70031	60.9528	3.50961	85.9125	69.535	77.266	7.645	10.92	9.229	5.771	6.529	6.144	13.8383	18.5781	1.10396	100
Hong Kong SAR, China	HKG	2013	4.33799	9.28642	66.0831	75.3695	442.62	91.1139	3.10152	68.0859	3.76032	85.8105	70.588	76.607	7.715	11.329	9.444	6.203	7.162	6.675	14.2605	19.2461	0.401983	100
Hong Kong SAR, China	HKG	2014	4.42365	9.47856	66.494	75.9726	425.976	90.4754	2.76243	69.6882	3.57255	85.7845	70.669	76.013	8.073	10.411	9.202	6.375	6.876	6.622	14.7773	20.0753	0.702371	100
Hong Kong SAR, China	HKG	2015	2.99085	9.64287	66.4264	76.0693	389.406	89.837	2.38778	68.7009	3.26212	86.0908	71.223	76.549	9.548	11.378	10.424	6.763	6.438	6.603	15.3826	21.05	0.851198	100
Hong Kong SAR, China	HKG	2016	2.40931	9.95636	66.2532	76.2096	371.727	89.5271	2.17543	70.3316	3.29269	85.6648	71.544	76.184	8.557	11.004	9.728	5.91	6.292	6.099	15.9951	22.0591	0.619366	100
Hong Kong SAR, China	HKG	2017	1.49387	9.83027	67.0916	76.9219	376.796	88.6354	3.79611	72.9229	3.30989	85.7336	71.896	76.786	7.944	9.186	8.531	6.167	6.606	6.384	16.5707	23.0546	0.768514	100
Hong Kong SAR, China	HKG	2018	2.40613	9.92513	68.294	78.2191	376.893	88.6972	2.84695	78.2463	3.32624	85.8407	72.43	76.66	7.556	9.993	8.731	6.115	6.871	6.488	17.1963	24.144	0.800231	100
Hong Kong SAR, China	HKG	2019	2.88321	10.8764	69.3745	80.2509	353.744	90.0069	-1.67245	83.8542	3.81018	86.1085	72.079	76.492	6.566	10.609	8.527	6.068	7.4	6.725	17.9525	25.4413	0.739283	100
Hong Kong SAR, China	HKG	2020	0.250962	12.7458	66.343	79.0889	350.68	89.4275	-6.5448	89.9479	4.40562	86.3456	71.569	76.978	13.699	17.478	15.533	8.288	9.715	8.992	18.8253	26.9326	-0.358933	100
Hong Kong SAR, China	HKG	2021	1.56876	12.6776	64.977	77.6547	402.46	89.6757	6.45444	97.3813	4.00031	86.1551	71.959	77.08	10.431	15.255	12.79	6.344	8.156	7.242	19.7549	28.563	-0.911777	100
Hong Kong SAR, China	HKG	2022	1.88137	14.3371	66.3411	80.6782	384.881	91.0668	-3.68378	100.776	3.72866	85.8015	71.322	75.095	10.11	11.986	11.03	6.483	6.921	6.701	20.6844	30.2384	-0.907915	100
Hong Kong SAR, China	HKG	2023	2.09661	13.3007	69.9731	83.2738	353.008	91.3705	3.22386	105.462	3.80327	85.7823	71.182	74.007	8.371	9.59	8.973	5.628	6.255	5.942	21.6453	31.9932	2.55352	100
Hong Kong SAR, China	HKG	2024	1.72972	12.8485	67.2771	80.1257	359.507	91.751	2.50499	120.09	3.80805	85.6979	71.467	73.161	8.621	10.422	9.507	5.066	6.262	5.668	22.6671	33.9201	-0.15936	100
Hong Kong SAR, China	HKG	2025										85.8033	71.603		8.002	9.938	8.958	5.102	6.294	5.704
Hungary	HUN	2005	3.56152	22.1447	54.7431	76.7976	128.005	55.2363	4.30028	64.9774	5.32008	62.7581	63.894	78.792	19.357	19.885	19.653	14.053	11.444	12.722	15.5257	22.5301	-0.198879	66.1261
Hungary	HUN	2006	3.93033	22.0123	53.2794	75.2767	149.232	56.0697	3.93393	66.3987	5.28974	63.0177	64.108	77.241	20.037	18.835	19.364	13.879	11.046	12.435	15.6863	22.7421	-0.155716	67.0156
Hungary	HUN	2007	7.95875	20.7877	54.2831	75.0593	155.601	55.8106	0.332354	66.2653	5.13495	63.026	64.121	75.848	18.954	17.511	18.147	13.04	9.936	11.458	15.8738	23.0103	-0.154915	67.0042
Hungary	HUN	2008	6.04251	21.3872	53.5575	74.9033	158.453	56.4125	0.993437	63.9738	4.96764	63.4619	64.12	75.443	20.429	18.95	19.602	12.92	10.063	11.463	16.0785	23.3226	-0.175097	68.0977
Hungary	HUN	2009	4.21171	22.0634	53.5805	75.6033	145.306	56.8583	-6.74017	61.9772	4.94636	64.234	63.544	75.002	24.554	27.833	26.393	14.526	12.722	13.605	16.3036	23.6794	-0.154909	68.4593
Hungary	HUN	2010	4.85556	21.4453	52.776	74.1427	157.839	56.627	1.06795	60.7488	4.72375	64.7555	64.145	74.916	24.699	27.747	26.392	13.437	11.711	12.555	16.4983	23.9799	-0.226014	69.5305
Hungary	HUN	2011	3.92992	20.6307	52.9722	73.3343	166.754	55.964	1.91671	59.9985	4.56318	64.2752	64.526	75.341	24.703	26.952	25.957	14.339	12.141	13.213	16.7026	24.301	-0.28336	69.478
Hungary	HUN	2012	5.65215	20.0094	53.9171	73.7139	166.176	55.1994	-1.33948	60.6758	4.1425	65.1444	65.547	75.084	27.161	29.023	28.185	15.98	13.652	14.785	16.992	24.7945	-0.516438	69.5772
Hungary	HUN	2013	1.7332	19.7286	52.1963	71.7938	164.476	55.4668	2.03217	57.2067	4.18922	65.3276	66.606	74.686	27.905	25.523	26.545	17.42	13.615	15.466	17.3215	25.385	-0.48126	69.9278
Hungary	HUN	2014	-0.227566	19.9811	50.064	69.8635	168.358	54.8739	4.33435	52.8165	4.60187	64.8216	68.705	72.751	20.956	19.934	20.378	15.316	12.011	13.619	17.6863	26.0666	-0.402888	70.3071
Hungary	HUN	2015	-0.0616447	19.7029	49.014	68.5642	167.291	54.1103	3.65982	50.0657	4.4954	64.7707	70.461	72.854	15.996	18.269	17.272	12.799	10.429	11.581	18.056	26.7683	-0.359466	70.4848
Hungary	HUN	2016	0.394769	19.9033	49.9397	69.7168	163.972	55.5583	2.43864	49.4771	4.61548	64.5221	72.071	73.608	12.915	12.929	12.923	13.357	8.864	11.047	18.4383	27.4992	-0.388598	70.4734
Hungary	HUN	2017	2.34824	20.1614	50.0154	70.2675	165.033	55.9261	4.12418	49.9103	4.64757	63.44	73.058	73.065	12.028	9.68	10.699	14.345	7.916	11.039	18.7797	28.162	-0.338686	70.4543
Hungary	HUN	2018	2.85025	19.6169	49.059	68.8162	162.701	56.0731	5.60614	50.8999	4.62344	62.6263	73.924	73.286	10.615	9.745	10.115	14.065	7.605	10.741	19.1292	28.842	-0.203687	70.4712
Hungary	HUN	2019	3.33859	19.9741	48.9398	69.0958	159.926	56.5905	5.07718	52.361	4.22488	63.1295	74.56	73.261	10.981	11.815	11.472	13.231	8.928	11.015	19.6029	29.7702	-0.125143	70.4565
Hungary	HUN	2020	3.32674	21.1999	49.1062	70.8866	154.527	56.7924	-4.33873	54.602	4.15357	63.362	74.904	72.065	14.111	11.963	12.882	14.069	9.555	11.743	20.0907	30.7424	-0.25205	70.2917
Hungary	HUN	2021	5.11097	20.7647	47.9601	69.4283	159.188	57.3675	7.22292	56.525	4.68406	64.2342	75.971	76.844	15.475	12.1	13.549	13.181	8.198	10.615	20.405	31.378	-0.409164	70.2059
Hungary	HUN	2022	14.6081	20.6378	49.8297	71.0949	185	57.6156	4.15238	58.0703	3.81259	64.3628	77.037	77.729	9.527	11.316	10.541	11.379	8.388	9.841	20.6076	31.7813	-0.26885	70.1585
Hungary	HUN	2023	17.125	19.9521	49.3124	69.8846	158.386	58.2754	-0.817107	56.5924		64.5403	78.067	77.757	12.245	13.163	12.779	11.136	8.598	9.832	20.8191	32.1801	-0.134269	70.2923
Hungary	HUN	2024	3.7037			72.2632	146.505	59.5232	0.560118			64.9442	78.234	77.834	14.808	15.306	15.088	11.457	8.582	9.98	20.9932	32.4945	-0.31451	70.4918
Hungary	HUN	2025										65.3517	78.277		13.878	14.46	14.205	11.505	8.602	10.014
Iceland	ISL	2005	3.98705	24.0373	57.4077	82.4021	71.2107	60.4397	7.02934	69.8324	7.33844	71.7778	85.765	91.43	5.85	8.26	7.051	5.081	5.051	5.066	11.721	17.7015	1.58289	92.3774
Iceland	ISL	2006	6.68708	24.0228	55.6883	80.5583	76.6309	58.9558	5.67161	72.9682	7.19522	72.1382	86.844	91.129	7.345	8.493	7.921	5.94	4.3	5.101	11.6173	17.3798	2.34742	92.1949
Iceland	ISL	2007	5.05156	23.4713	54.8322	79.2135	73.625	62.6184	8.74133	73.137	6.94433	73.1841	86.916	90.794	5.934	7.394	6.685	5.168	3.582	4.355	11.5447	17.1407	2.53009	92.3615
Iceland	ISL	2008	12.6944	24.0312	51.3122	76.18	81.9027	61.5632	1.69961	73.5755	7.03602	73.3927	85.962	90.112	7.072	8.652	7.868	5.434	4.665	5.04	11.5784	17.145	1.85957	93.0646
Iceland	ISL	2009	12.0031	25.1925	51.1024	77.2105	89.0014	65.3711	-8.32146	72.4676	7.18985	75.6648	84.3	90.342	11.654	19.343	15.455	7.182	10.076	8.658	11.8021	17.5371	0.341242	93.4441
Iceland	ISL	2010	5.39673	24.5152	50.7901	76.3581	92.4902	62.1191	-2.22182	78.5031	6.94424	75.9715	84.483	89.991	13.785	17.977	15.857	7.827	7.94	7.885	12.1352	18.1298	-0.143903	93.4588
Iceland	ISL	2011	4.00103	24.597	51.2782	76.9044	100.133	61.4275	1.38	79.9194	6.78998	75.9566	84.269	90.721	10.511	17.759	14.151	6.166	8.081	7.147	12.4508	18.6625	0.305468	93.4111
Iceland	ISL	2012	5.1859	24.4377	52.7736	78.1741	102.433	62.1885	1.16931	79.5825	7.58223	76.2268	84.683	90.852	12	14.41	13.201	5.602	7.633	6.644	12.7719	19.1993	0.532101	93.5149
Iceland	ISL	2013	3.87228	24.1713	52.089	77.0384	97.698	63.1097	3.59696	78.3724	7.44869	76.9191	85.647	90.647	7.643	13.278	10.415	4.946	7.924	6.474	13.0702	19.7023	0.945886	93.6167
Iceland	ISL	2014	2.04461	23.8773	51.7455	76.3872	95.2879	63.9202	1.91382	80.3951	7.64141	77.0331	87.168	91.014	6.507	12.517	9.566	5.276	6.144	5.721	13.3619	20.1861	1.1125	93.6197
Iceland	ISL	2015	1.63306	23.1848	49.1693	73.026	94.8888	64.6414	3.76859	75.642	7.45797	77.9243	88.207	91.712	6.617	10.531	8.578	3.181	6.247	4.751	13.6793	20.686	1.04194	93.7279
Iceland	ISL	2016	1.69693	22.6927	48.5923	71.9664	87.76	65.5967	6.21809	74.7006	7.4322	78.645	89.202	91.749	6.146	6.481	6.317	3.662	4.882	4.286	13.9214	21.0324	1.38808	93.7823
Iceland	ISL	2017	1.76042	23.3638	49.4325	73.4409	86.3585	65.669	3.48507	71.3372	7.58386	78.7603	88.528	91.329	6.778	8.276	7.544	3.836	4.285	4.066	14.0229	21.1116	2.34558	93.7719
Iceland	ISL	2018	2.68292	23.7699	49.5011	73.7961	88.935	65.251	4.66077	69.3402	7.5635	79.1772	87.356	90.208	5.439	6.351	5.902	5.829	4.805	5.305	14.121	21.1709	2.67814	93.8527
Iceland	ISL	2019	3.01397	24.2879	49.5641	74.1612	83.7924	66.1183	1.13821	70.6094	7.6013	78.4906	87.095	90.165	5.476	11.44	8.449	3.699	6.708	5.237	14.2993	21.3972	2.19893	93.9771
Iceland	ISL	2020	2.84792	27.555	51.0045	79.3312	68.655	65.1626	-6.64588	74.5906	8.58383	78.0107	84.88	88.067	8.864	10.904	9.872	6.224	7.068	6.655	14.5644	21.833	1.62309	94.1367
Iceland	ISL	2021	4.44424	26.9118	50.6379	78.6821	76.2317	64.7448	5.18057	86.5232	8.20908	76.9958	84.87	85.957	10.699	12.971	11.831	5.618	8.272	6.973	14.8686	22.3565	1.63932	94.2108
Iceland	ISL	2022	8.30876	25.2083	49.4705	75.3143	93.0487	64.4414	8.82069	84.9852	7.28924	77.952	86.496	86.687	5.5	11.329	8.421	3.384	7.817	5.639	15.111	22.7195	2.51377	94.1787
Iceland	ISL	2023	8.7363	25.1365	48.955	73.9619	87.4049	65.3769	5.18616	76.5201		77.9753	86.713	85.49	7.013	10.033	8.488	3.552	8.067	5.843	15.3483	23.0471	0.953547	94.1518
Iceland	ISL	2024	5.85684			74.9516	85.9672	64.8921	-0.970676			77.8855	87.527	86.493	8.905	8.656	8.78	3.617	4.321	3.975	15.6448	23.4936	0.218346	94.1819
Iceland	ISL	2025										78.1495	87.512		8.084	9.249	8.671	3.637	4.37	4.012
India	IND	2005	4.24634	10.3661	57.3787	67.7449	42.0017	44.4429	7.92343	11.1277	3.18875	25.9783	61.646	68.912	20.416	21.389	21.117	51.696	9.842	29.865	4.67468	7.56868	1.63142	29.0945
India	IND	2006	5.79652	9.80247	56.1099	65.9124	45.7245	44.0432	8.06073	11.9628	3.14285	26.2031	60.664		20.684	21.767	21.472	51.451	9.902	29.782	4.7219	7.59765	1.56413	29.431
India	IND	2007	6.37288	9.86212	55.7605	65.6226	45.6863	44.0082	7.66082	13.6565		26.3092	59.7		20.977	22.188	21.863	51.127	9.849	29.601	4.77	7.62619	1.50599	29.781
India	IND	2008	8.34927	10.5385	56.6768	67.2153	53.3682	45.8825	3.0867	15.6485		26.3694	58.759		21.397	22.779	22.417	50.658	9.874	29.386	4.82208	7.6617	1.43877	30.1438
India	IND	2009	10.8824	11.4597	55.9599	67.4196	46.2729	45.9849	7.86189	16.6775	3.27825	26.492	57.843		21.717	23.259	22.862	50.4	9.878	29.26	4.87809	7.70331	1.44602	30.5185
India	IND	2010	11.9894	11.0076	54.7249	65.7325	49.2552	45.0337	8.49758	18.5418	3.37769	26.566	56.953	63.087	22.02	23.729	23.299	49.877	9.766	28.943	4.94045	7.75371	1.4546	30.9042
India	IND	2011	8.91179	11.0845	56.2072	67.2917	55.6239	45.4421	5.24132	23.2663	3.79618	27.3773	56.314		22.337	24.067	23.641	48.171	8.855	27.641	5.01241	7.81874	1.41683	31.2747
India	IND	2012	9.479	10.6839	56.461	67.1448	55.7937	46.3011	5.45639	24.7312	3.8675	28.2198	55.693	64.064	22.776	24.567	24.135	46.942	8.513	26.863	5.09339	7.89781	1.37406	31.5899
India	IND	2013	10.0179	10.2952	57.6458	67.9409	53.8441	46.6987	6.38611	24.1638	3.84467	29.0034	55.608		23.21	24.865	24.473	46.852	9.821	27.491	5.18263	7.98839	1.3327	31.9097
India	IND	2014	6.66566	10.4409	58.1277	68.5686	48.9222	47.8224	7.41023	25.7536	3.89878	29.8493	55.518		23.579	25.052	24.709	46.439	10.87	27.829	5.30715	8.1328	1.26129	32.2288
India	IND	2015	4.90697	10.4283	59.0073	69.4356	41.9229	47.7837	7.99625	27.0646	4.11457	30.7722	55.422		23.974	25.251	24.959	46.174	11.944	28.251	5.46921	8.33496	1.19286	32.5473
India	IND	2016	4.94822	10.3085	59.2953	69.6038	40.0825	47.7494	8.25631	27.0876	4.25408	31.6057	55.326		24.386	25.475	25.23	45.95	13.131	28.755	5.64173	8.55156	1.19163	32.8651
India	IND	2017	3.32817	10.7672	58.7251	69.4923	40.7425	47.6709	6.79538	27.7311	4.30545	32.4672	55.23		24.872	25.795	25.591	45.789	14.401	29.337	5.82471	8.78175	1.1624	33.1821
India	IND	2018	3.93883	10.8232	59.2883	70.1115	43.617	48.4316	6.45385	28.3541	4.36374	33.3391	55.13	60.646	25.408	26.168	26.003	45.746	15.757	30.023	6.01926	9.03074	1.0973	33.4984
India	IND	2019	3.72951	11.0027	60.9113	71.914	39.9054	50.085	3.87144	28.7997	3.89732	34.0971	55.026	61.446	23.192	22.881	22.947	45.42	15.818	29.896	6.22347	9.29651	1.04001	33.814
India	IND	2020	6.62344	11.6125	61.0981	72.7106	37.7581	47.9327	-5.77772	29.562	4.29335	31.6209	54.374	61.103	24.9	24.605	24.666	45.269	17.495	30.703	6.41685	9.54352	0.973439	34.1287
India	IND	2021	5.13141	10.4764	60.9504	71.4268	45.4231	47.8472	9.68959	31.3171	4.6295	31.4503	55.481	61.889	19.621	21.158	20.824	43.697	13.774	28.006	6.54579	9.69043	0.822648	34.4426
India	IND	2022	6.69903	10.255	61.4636	71.7187	50.0753	49.7252	7.60936	32.454	4.09866	31.0187	56.666	63.462	18.714	17.447	17.732	41.853	11.165	25.763	6.699	9.87859	0.790201	34.7556
India	IND	2023	5.64914	10.3054	60.1881	70.4935	44.9928	49.5072	9.19075	34.0092		31.4572	57.925	65.269	15.515	15.619	15.595	38.112	10.227	23.494	6.92184	10.176	0.88329	35.0677
India	IND	2024	4.95304	9.98882	61.3836	71.3724	44.6493	49.8744	6.49477	34.4185		32.2743	58.991	65.309	17.084	15.32	15.746	39.361	10.41	24.188	7.14652	10.4742	0.890707	35.3789
India	IND	2025										32.5576	59.11		17.528	15.541	16.022	39.573	10.424	24.299
Indonesia	IDN	2005	10.4532	8.10951	64.3625	72.472	63.9879	40.3323	5.69257	16.6967	2.87282	38.3648	66.572	87.242	30.67	23.493	26.302	40.918	23.202	31.86	5.53639	8.46412	1.28381	46.2374
Indonesia	IDN	2006	13.1087	8.62717	62.6691	71.2962	56.6571	40.0826	5.50095	16.7672		40.5038	66.415	85.209	27.489	22.731	24.616	39.531	21.722	30.419	5.62191	8.57255	1.32526	47.0018
Indonesia	IDN	2007	6.40656	8.34647	63.5427	71.8892	54.8292	39.4842	6.34502	17.5766	3.04425	41.1092	68.402	80.467	25.614	21.104	22.861	39.423	21.08	30.031	5.69806	8.66853	1.32087	47.7433
Indonesia	IDN	2008	10.2267	8.42378	60.6213	69.045	58.5614	37.4575	6.0137	20.521	2.9019	41.2105	68.6	84.383	21.562	18.444	19.644	36.949	19.772	28.15	5.76618	8.75286	1.29735	48.4645
Indonesia	IDN	2009	4.38641	9.58918	58.7028	68.2919	45.5121	37.0577	4.62887	22.6933	3.52513	42.0006	68.253	79.835	20.942	17.929	19.106	36.065	19.675	27.666	5.82734	8.82441	1.26699	49.1678
Indonesia	IDN	2010	5.13421	9.00591	56.2172	65.2231	46.7013	40.666	6.22385	23.4159	2.81228	42.9721	68.858	84.013	19.089	16.792	17.691	34.877	18.825	26.649	5.88112	8.88436	1.26054	49.8521
Indonesia	IDN	2011	5.35605	9.05868	55.4234	64.482	50.18	40.5846	6.16978	25.0274	3.18944	43.5903	69.388	85.448	19.548	17.662	18.393	33.909	18.282	25.897	5.92975	8.93763	1.27669	50.483
Indonesia	IDN	2012	4.27951	9.24879	56.3892	65.638	49.5829	40.8734	6.03005	29.0425	3.40748	43.7825	69.951	87.917	16.29	15.282	15.673	31.154	15.151	22.949	5.97203	8.98164	1.28584	51.1594
Indonesia	IDN	2013	6.41249	9.51772	56.8295	66.3472	48.6374	41.5165	5.55726	29.8945	3.35904	44.2425	69.272	86.606	16.462	15.673	15.977	30.497	15.657	22.888	6.00969	9.01717	1.24038	51.8307
Indonesia	IDN	2014	6.39493	9.42503	57.1391	66.5641	48.0802	42.2422	5.00667	29.9905	3.28801	44.497	69.063	86.41	16.495	15.653	15.977	29.632	15.437	22.354	6.04134	9.04292	1.17536	52.5002
Indonesia	IDN	2015	6.36312	9.74941	57.45	67.1994	41.9376	43.3091	4.87632	32.459	3.5836	45.1011	69	85.621	17.346	17.147	17.224	29.49	16.673	22.919	6.08185	9.08383	1.12234	53.1721
Indonesia	IDN	2016	3.5258	9.52781	57.8268	67.3546	37.4213	43.6417	5.03307	34.8307	1.21023	46.6339	68.742	85.594	16.095	15.935	15.997	29.17	16.119	22.479	6.14856	9.16632	1.07449	53.8126
Indonesia	IDN	2017	3.8088	9.12057	57.2756	66.3961	39.3555	43.6141	5.06979	35.967	1.05324	47.3558	69.047	84.865	14.371	14.672	14.553	27.978	15.243	21.449	6.23843	9.28362	1.02233	54.4541
Indonesia	IDN	2018	3.19835	9.02123	56.9799	66.0011	43.0743	43.4048	5.17429	36.1495	0.994436	48.1688	70.028	81.859	16.541	16.259	16.369	27.937	15.844	21.738	6.35096	9.43481	0.969743	55.0957
Indonesia	IDN	2019	3.03058	8.80847	57.9305	66.7389	37.6278	44.2207	5.01929	37.3231	0.964399	49.1356	70.571	84.082	13.303	13.763	13.577	26.226	15.148	20.547	6.48568	9.61948	0.935605	55.7382
Indonesia	IDN	2020	1.91984	9.65575	58.9339	68.5896	32.9722	44.4134	-2.06551	38.1651	1.01593	49.0568	69.644	82.264	14.383	15.035	14.773	26.902	16.95	21.8	6.60791	9.78113	0.849801	56.2785
Indonesia	IDN	2021	1.56008	9.24694	55.6288	64.8758	40.2048	42.8228	3.70289	40.6293	1.03222	49.2514	68.176	80.481	12.689	14.579	13.8	26.159	18.934	22.455	6.68701	9.8719	0.704601	56.8762
Indonesia	IDN	2022	4.20946	7.68965	53.0451	60.7347	45.4647	41.7909	5.3072	42.326	0.863943	48.8472	69.081	80.438	13.671	14.319	14.054	27.219	17.695	22.336	6.82467	10.0509	0.74605	57.4935
Indonesia	IDN	2023	3.66939	7.45486	54.4256	61.8804	41.3363	42.8794	5.04902	44.8813	1.27517	49.2692	69.943	81.418	12.979	13.038	13.015	26.297	16.677	21.365	7.04854	10.3629	0.842666	58.1179
Indonesia	IDN	2024	2.18151	7.73094	55.4002	63.1311	42.5726	43.7719	5.03034			49.7538	70.053		13.037	13.101	13.075	26.411	16.705	21.435	7.2886	10.7007	0.813872	58.751
Indonesia	IDN	2025										50.1699	70.121		12.745	13.134	12.977	26.524	16.734	21.505
Iran, Islamic Rep.	IRN	2005	13.4331	12.0762	41.2034	53.2796	54.4405	47.9812	3.1898	22.6842	4.05651	44.4228	47.927	48.27	32.431	20.631	23.396	50.491	22.012	36.009	4.68744	6.78703	2.21305	67.8709
Iran, Islamic Rep.	IRN	2006	10.0159	12.4659	41.4366	53.9025	53.1674	49.1253	4.9998	25.307	4.28999	44.778	47.117	46.453	31.589	21.165	23.534	50.306	21.94	35.806	4.74589	6.78513	2.15444	68.3102
Iran, Islamic Rep.	IRN	2007	17.341	9.4771	41.4252	50.9023	49.8873	47.6078	8.15577	29.8214	4.59681	44.7368	46.308	45.233	30.008	20.2	22.347	48.427	21.144	34.456	4.82831	6.83866	1.63509	68.8062
Iran, Islamic Rep.	IRN	2008	25.4105	10.0527	41.6604	51.7131	48.2294	48.6423	0.250857	36.1939	3.91376	45.0566	44.154	48.886	33.649	20.445	23.136	47.57	21.414	34.193	4.93335	6.9441	1.21448	69.379
Iran, Islamic Rep.	IRN	2009	13.5516	11.1823	44.4956	55.6779	43.6996	51.4807	1.00739	36.4833	3.84245	46.574	44.938	49.524	32.137	22.789	24.716	47.987	22.232	34.833	5.04252	7.07258	1.24185	69.9901
Iran, Islamic Rep.	IRN	2010	10.0894	10.8045	42.922	53.7265	43.7706	51.1373	5.79794	42.5482	3.70918	47.0323	44.363	49.017	40.572	25.607	28.7	47.358	22.004	34.426	5.15945	7.22648	1.25167	70.6093
Iran, Islamic Rep.	IRN	2011	26.2934	13.2008	42.2729	55.4738	41.2194	48.7237	2.64572	48.0596	3.48497	49.034	42.714	46.447	41.551	23.073	26.645	45.518	20.752	32.9	5.28818	7.40813	1.23587	71.2041
Iran, Islamic Rep.	IRN	2012	27.2568	13.3279	47.8056	61.1335	44.0893	50.4291	-3.74717	53.9002	2.939	47.3911	44.009	47.512	40.177	23.484	26.894	44.65	20.034	32.103	5.42935	7.61561	1.25131	71.7634
Iran, Islamic Rep.	IRN	2013	36.603	12.9739	46.8467	59.8206	47.0867	47.6419	-1.52198	56.4633	2.85279	47.8674	43.452	45.583	41.305	20.013	23.872	49.115	18.429	33.452	5.5795	7.84537	1.30691	72.3031
Iran, Islamic Rep.	IRN	2014	16.6066	12.8201	47.3489	60.1691	45.3514	49.3557	4.98478	64.4999	2.61669	48.6895	43.344	44.382	43.272	21.221	24.972	48.859	18.475	33.334	5.77068	8.14873	1.34313	72.8324
Iran, Islamic Rep.	IRN	2015	12.4847	15.5688	53.4216	68.9904	39.4226	55.182	-1.42488	70.6859	2.62911	49.7102	44.565	46.033	42.208	22.221	25.962	47.556	18.593	32.746	6.0066	8.53182	1.36159	73.3561
Iran, Islamic Rep.	IRN	2016	7.24543	15.0516	49.2164	64.268	39.8772	54.0362	8.81509	67.9112	3.17397	50.668	46.019	47.31	43.612	25.384	29.087	46.037	19.34	32.382	6.25108	8.93239	1.43349	73.8796
Iran, Islamic Rep.	IRN	2017	8.04492	15.0479	47.1364	62.1842	43.1557	52.2187	3.02685	66.3514	3.45957	50.7119	47.313	47.443	42.99	24.118	28.208	45.854	19.282	32.263	6.50078	9.3397	1.4387	74.4012
Iran, Islamic Rep.	IRN	2018	18.0141	15.1649	46.696	61.8609	56.6153	50.0805	-3.74796	60.8611	3.61979	50.9921	47.579	58.735	39.521	24.214	27.502	45.716	19.078	32.09	6.75643	9.75213	1.27525	74.8034
Iran, Islamic Rep.	IRN	2019	39.9073	14.8711	47.2788	62.1499	48.5918	51.694	-2.36144	58.117	3.24005	50.846	47.371	57.845	38.34	22.693	25.948	43.461	17.935	30.401	7.01599	10.1577	1.07832	75.2039
Iran, Islamic Rep.	IRN	2020	30.5941	13.701	43.5079	57.209	43.8845	48.8099	4.44181	55.6367	3.20495	49.8044	44.693	53.478	35.546	21.208	23.712	41.219	18.138	29.404	7.22936	10.4779	0.768757	75.5986
Iran, Islamic Rep.	IRN	2021	43.389	14.0762	41.5062	55.5824	42.6724	47.742	4.1309	54.2834		50.4238	44.485	53.359	36.57	20.957	23.752	38.677	16.79	27.468	7.40518	10.7252	0.831029	75.9926
Iran, Islamic Rep.	IRN	2022	43.4885	12.6797	42.2882	54.9679	48.9184	45.3409	4.35281	58.6678	2.66998	50.5017	44.091	53.838	35.663	19.905	22.686	37.365	17.013	26.94	7.629	11.0326	1.201	76.3342
Iran, Islamic Rep.	IRN	2023	44.5792	12.5507	43.4946	56.0453	49.3936	47.6289	5.33235		2.82443	50.9236	45.302	54.798	31.487	18.734	21.265	35.716	16.066	25.65	7.91608	11.432	1.20408	76.676
Iran, Islamic Rep.	IRN	2024	32.4559	13.0842	45.4695	58.5537	52.0621	49.7875	3.66312			51.2855	45.186	54.149	31.475	18.752	21.307	35.941	16.147	25.8	8.23901	11.8854	1.05287	77.0201
Iran, Islamic Rep.	IRN	2025										51.6741	45.015		32.039	19.338	21.9	36.167	16.228	25.95
Iraq	IRQ	2005	36.9595	19.9683	37.5247	57.4929	115.743	30.0181	1.67523	15.5581		63.302	43.461		19.365	16.648	16.908	71.198	21.486	45.972	2.99116	5.50037	2.96374	68.3914
Iraq	IRQ	2006	53.231	15.6761	37.1661	52.8422	89.6505	33.2311	5.6383			63.5999	43.443		19.136	16.494	16.761	71.168	21.514	45.99	2.98659	5.4634	0.733263	68.5591
Iraq	IRQ	2007	-10.0675	18.7262	38.5471	57.2734	74.0929	35.4163	1.88854			64.2781	43.421	79.604	19.411	16.944	17.207	71.249	21.881	46.236	2.98484	5.43196	-0.789043	68.7165
Iraq	IRQ	2008	12.6629	16.6464	31.2632	47.9096	81.0555	34.2661	8.22811			64.3749	43.263		21.313	16.4	16.914	70.03	20.735	45.055	2.98753	5.40834	2.0203	68.857
Iraq	IRQ	2009	6.87362	21.0633	52.2463	73.3096	78.6874	43.5373	3.3793			64.8808	43.108		23.432	16.063	16.818	69.045	19.928	44.14	2.99327	5.39132	3.68391	68.9742
Iraq	IRQ	2010	2.87775	18.9188	44.443	63.3618	73.4975	39.686	6.40256			64.788	42.954		25.437	15.59	16.579	67.902	18.956	43.059	2.99874	5.3781	3.23139	69.0583
Iraq	IRQ	2011	5.80146	19.673	35.0901	54.7632	72.1713	33.4821	7.54647			64.7403	42.8		27.601	15.238	16.453	66.694	17.998	41.955	3.00015	5.36507	3.53182	69.1252
Iraq	IRQ	2012	6.0891	16.5832	39.8463	56.4295	73.6087	35.8894	13.9364			64.3491	42.645	64.977	29.496	14.663	16.091	65.278	16.829	40.645	2.99518	5.34365	4.53892	69.2222
Iraq	IRQ	2013	1.8795	17.4554	38.6336	56.089	67.41	37.9634	7.62829			64.3025	43.648		37.543	15.676	17.913	63.995	16.938	40.054	3.00146	5.34139	4.72157	69.4445
Iraq	IRQ	2014	2.23597	18.0026	42.0663	60.0689	68.9825	40.1122	2.26369			64.4825	44.665		45.664	16.77	19.908	62.868	17.194	39.618	3.02042	5.35919	3.53102	69.6667
Iraq	IRQ	2015	1.39333	18.6661	55.6791	74.3452	69.5918	51.2497	2.60677			64.7436	44.72		41.682	18.403	21.387	61.18	18.064	39.22	3.04511	5.3821	2.72711	69.9205
Iraq	IRQ	2016	0.556521	18.3892	56.833	75.2223	54.5883	50.7799	13.7874			64.6174	44.775		37.463	19.78	22.446	59.057	18.458	38.377	3.08574	5.42909	2.39151	69.9124
Iraq	IRQ	2017	0.184059	16.3053	51.4551	67.7604	59.7809	47.0337	-1.81975			64.7653	43.51		62.553	21.581	25.276	58.429	18.956	38.323	3.15072	5.51565	2.23055	69.8945
Iraq	IRQ	2018	0.367441	15.8795	43.5381	59.4176	65.8018	44.1912	2.63385			64.9264	42.929		61.123	23.469	27.338	56.837	19.567	37.845	3.23304	5.62893	2.33236	69.8765
Iraq	IRQ	2019	-0.198965	19.3154	42.9672	62.2826	68.9899	44.4241	5.51379			65.127	42.285		60.408	25.718	29.75	55.176	20.162	37.322	3.3172	5.74192	2.27501	69.8683
Iraq	IRQ	2020	0.574163	22.5089	52.2947	74.8036	57.7423	54.8196	-12.0368			65.0586	42.121		65.857	30.321	34.45	54.151	21.645	37.565	3.3604	5.77935	2.21939	69.8683
Iraq	IRQ	2021	6.04186	17.7173	40.3434	58.0607	61.5033	42.6181	1.50218			64.8404	41.507	74.713	62.206	31.732	35.653	52.481	22.024	36.932	3.38105	5.77397	2.24127	69.8683
Iraq	IRQ	2022	4.99477	13.7692	31.7249	45.4942	68.7588	33.1587	7.95905			64.521	43.3		65.273	27.831	31.791	52.584	20.754	36.326	3.39761	5.75716	2.2937	69.8683
Iraq	IRQ	2023	4.35835	17.5275	39.7848	57.3124	69.4613	43.6679	0.517706			65.0181	43.445		65.375	27.702	31.514	52.823	20.741	36.429	3.3967	5.7076	2.25149	69.8683
Iraq	IRQ	2024	-12.297	18.22	40.4447	58.6647	70.7087	45.7662	-1.54525			65.0595	43.375		65.589	27.864	31.726	53.132	20.973	36.692	3.41439	5.69024	2.12477	69.8861
Iraq	IRQ	2025										65.2955	43.355		66.368	28.108	32.012	53.394	21.13	36.894
Ireland	IRL	2005	2.45655	16.0571	43.6346	59.6917	148.176	56.7283	5.73978	58.8693	4.51898	66.2896	74.913	83.28	6.896	8.594	7.821	9.335	8.463	8.893	11.0135	16.1062	2.1787	60.4883
Ireland	IRL	2006	3.93576	16.2267	43.8194	60.0462	150.022	56.9183	4.98785	58.4412	4.54742	66.7043	75.164	83.433	7.377	8.354	7.909	9.864	8.668	9.258	10.8716	15.8149	2.69601	60.7704
Ireland	IRL	2007	4.88575	16.847	45.1901	62.0371	153.397	59.2649	5.31012	58.302	4.71541	68.79	75.564	85.48	7.869	10.251	9.159	10.322	9.823	10.07	10.7787	15.639	2.89096	61.0602
Ireland	IRL	2008	4.03569	18.6524	48.3816	67.034	160.039	62.5731	-4.48407	54.0175	5.45828	71.4269	74.838	84.701	10.055	16.467	13.471	11.428	13.614	12.525	10.8487	15.7911	2.03871	61.3582
Ireland	IRL	2009	-4.44755	20.0406	47.2756	67.3162	173.591	63.6935	-5.09578	56.504	6.15611	74.5566	73.018	84.055	16.801	31.562	24.509	15.058	21.539	18.298	11.0746	16.2439	1.01566	61.6421
Ireland	IRL	2010	-0.918389	18.6808	47.4577	65.9754	190.08	66.7588	1.68297	63.1264	6.04837	76.1652	71.604	82.823	20.905	34.814	28.157	16.704	22.19	19.454	11.3784	16.8485	0.544884	61.8911
Ireland	IRL	2011	2.54898	18.9394	45.657	64.3696	186.305	65.9202	1.60887	67.7986	5.772	76.8242	71.18	82.266	22.327	36.131	29.579	16.569	21.721	19.164	11.7172	17.5074	0.436072	62.0873
Ireland	IRL	2012	1.69474	18.0944	44.9412	62.7949	190.356	66.3653	-0.405029	68.1973	5.70778	77.2316	71.128	81.208	23.562	37.408	30.792	16.477	21.865	19.201	12.0822	18.1882	0.423744	62.2529
Ireland	IRL	2013	0.515099	16.8439	44.0962	60.7339	199.743	67.5381	2.19294	71.6995	5.23177	76.9929	71.795	81.398	22.778	30.307	26.732	15.165	17.677	16.44	12.4475	18.8453	0.526556	62.4047
Ireland	IRL	2014	0.190916	15.9876	41.6494	57.4959	211.182	67.1618	9.38579	73.8132	4.73555	77.2572	71.84	80.534	19.82	26.579	23.416	14.762	15.792	15.287	12.7952	19.4546	0.731001	62.5354
Ireland	IRL	2015	-0.33096	12.1147	31.8423	43.8251	223.703	54.2202	24.624	77.2321	3.62438	76.5642	72.061	80.933	16.333	23.57	20.235	12.915	15.617	14.293	13.1103	19.9938	0.944845	62.6392
Ireland	IRL	2016	0.0201248	12.5364	33.0858	45.3302	239.709	55.7173	1.22272	77.5571	3.65883	76.1722	72.662	80.82	13.557	19.662	16.797	11.671	13.55	12.629	13.3921	20.4601	1.28405	62.7229
Ireland	IRL	2017	0.362173	11.9292	30.8168	42.5635	233.304	55.604	10.1089	77.7806	3.37738	76.1134	72.633	81.11	12.605	16.046	14.402	10.53	11.411	10.979	13.672	20.9102	1.3498	62.9035
Ireland	IRL	2018	0.471131	11.744	29.9792	41.9379	222.454	56.2354	7.68866	77.2829	3.30348	76.4211	72.939	81.308	12.595	14.799	13.756	9.955	10.266	10.113	13.9536	21.353	1.45141	63.0845
Ireland	IRL	2019	0.937843	11.812	28.8102	40.8246	257.653	57.4736	4.97288	75.1799	3.22984	76.8018	73.251	81.153	10.59	14.179	12.457	9.961	10.396	10.182	14.2438	21.7983	1.58865	63.2737
Ireland	IRL	2020	-0.326184	12.6225	24.6667	37.4155	258.78	55.7688	7.1537	74.6803	3.19164	76.6974	71.883	80.606	15.275	15.251	15.263	11.405	12.777	12.103	14.5621	22.2879	1.26379	63.4713
Ireland	IRL	2021	2.34034	11.7055	23.6633	35.4088	231.032	55.1667	16.2582	78.7776	2.90463	76.0631	74.673	81.954	16.229	15.029	15.612	6.282	8.162	7.24	14.8536	22.7326	1.3958	63.6774
Ireland	IRL	2022	7.82946	11.0655	23.8388	35.2926	237.755	53.5116	7.51114	76.6049		76.7762	76.368	83.201	9.505	9.272	9.389	7.773	5.16	6.441	15.1619	23.1897	1.98102	63.892
Ireland	IRL	2023	6.29942	11.8264	26.0118	39.4763	239.65	60.2983	-2.53637			78.0908	78.058	82.42	9.514	10.748	10.161	4.919	5.21	5.067	15.5417	23.7491	1.87574	64.1152
Ireland	IRL	2024	2.11345			39.4541	246.17	60.5636	2.59947			77.5948	77.228	82.85	10.037	10.822	10.439	5.973	5.559	5.762	15.8921	24.2433	1.57376	64.347
Ireland	IRL	2025										77.9328	77.21		9.805	11.151	10.493	6.035	5.64	5.833
Isle of Man	IMN	2005							5.9												16.9571	25.7633	0.914679	51.1608
Isle of Man	IMN	2006							7.7												17.0548	25.8494	0.973664	51.1149
Isle of Man	IMN	2007							7.5												17.1141	25.9187	1.05674	51.2353
Isle of Man	IMN	2008							4.9												17.206	26.0646	1.08105	51.4684
Isle of Man	IMN	2009							2.1												17.3693	26.3508	1.10326	51.7305
Isle of Man	IMN	2010							3.4												17.5867	26.7418	1.11984	51.9396
Isle of Man	IMN	2011							2												17.9931	27.4985	0.605036	52.0246
Isle of Man	IMN	2012						92.9986	7.30389												18.6057	28.6625	-0.0557146	52.0555
Isle of Man	IMN	2013						93.1182	4.14186												19.2069	29.814	-0.2303	52.0804
Isle of Man	IMN	2014						93.7099	5.1551												19.7401	30.8271	-0.296371	52.0998
Isle of Man	IMN	2015						93.5701	-0.385867												20.2439	31.803	-0.357047	52.1165
Isle of Man	IMN	2016						93.647	6.9523												20.6707	32.6267	-0.152042	52.1332
Isle of Man	IMN	2017						93.6624	2.83776												21.0133	33.2576	0.171181	52.1498
Isle of Man	IMN	2018						93.415	2.2134												21.319	33.8026	0.23415	52.1652
Isle of Man	IMN	2019						93.934	0.254878												21.5915	34.2691	0.181209	52.179
Isle of Man	IMN	2020						91.772	-8.83682												21.8573	34.6967	0.127365	52.191
Isle of Man	IMN	2021						91.8134	3.83784												22.0467	34.9954	0.0499495	52.2
Isle of Man	IMN	2022						95.1498	-4.16539												22.3007	35.4435	0.0309086	52.1956
Isle of Man	IMN	2023																			22.713	36.1874	0.0392164	52.1833
Isle of Man	IMN	2024																			23.1528	36.9706	-0.00594089	52.1633
Israel	ISR	2005	1.3407	23.0146	53.4154	77.0143	78.3243	66.4381	4.38779	54.8961	5.58065	79.2304	69.882		18.725	17.09	17.862	19.291	15.745	17.484	9.95145	16.0016	1.7629	91.6384
Israel	ISR	2006	2.05408	22.5255	53.7313	76.7647	78.4353	66.4997	5.60163	54.3149	5.59034	79.5475	70.388		19.615	17.337	18.41	19.898	15.847	17.833	9.94224	15.9751	1.76781	91.6826
Israel	ISR	2007	0.466227	21.8374	54.5996	76.9438	78.8371	66.1692	6.32335	57.104	5.34945	79.3416	71.004		17.294	15.347	16.252	18.763	15.016	16.853	9.89574	15.8856	1.7761	91.7136
Israel	ISR	2008	4.52745	21.8126	55.5123	77.8049	75.3809	66.6168	3.2221	56.497	5.42382	79.3744	70.856		13.098	11.954	12.481	17.707	14.019	15.826	9.83821	15.7811	1.77658	91.7293
Israel	ISR	2009	3.36762	22.0062	54.3522	76.8707	61.6756	67.1934	1.23773	59.0821	5.36561	80.6847	70.799	74.79	13.783	15.546	14.709	17.755	15.294	16.5	9.83115	15.7808	2.39021	91.732
Israel	ISR	2010	2.7027	21.8954	54.689	77.038	65.6331	66.8073	5.53434	61.853	5.42143	80.8381	71.167	75.11	13.542	14.829	14.22	17.456	14.867	16.135	9.89779	15.9306	1.82675	91.7316
Israel	ISR	2011	3.48837	21.7734	54.9055	77.0982	68.9094	67.5742	5.5188	61.9456	5.44327	81.1691	70.928	76.65	11.716	11.922	11.825	17.054	14.123	15.558	10.0737	16.2842	1.84808	91.7304
Israel	ISR	2012	1.67554	22.0038	54.1763	76.6145	69.965	67.9642	2.44717	63.5913	5.57542	81.401	73.248	81.793	12.638	11.423	11.99	17.132	13.704	15.382	10.3422	16.8113	1.84615	91.7277
Israel	ISR	2013	1.58976	22.0526	53.7707	76.1891	64.1341	67.6558	4.08571	62.0624	5.78607	81.0221	73.156	81.405	10.551	10.271	10.4	16.09	12.829	14.425	10.59	17.2984	1.86605	91.7228
Israel	ISR	2014	0.467557	21.9319	53.5959	75.8584	61.7134	68.1298	3.77583	62.1056	5.70907	81.2068	73.832	82.168	11.013	9.924	10.429	16.635	12.4	14.472	10.7953	17.702	1.91954	91.7152
Israel	ISR	2015	-0.617343	21.9177	52.8843	75.0792	58.898	68.2996	2.2376	60.8228	5.81091	81.4047	73.842	82.109	9.651	8.809	9.202	16.064	12.638	14.314	11.0178	18.1396	1.98129	91.7043
Israel	ISR	2016	-0.535168	21.9138	53.1149	75.3424	57.799	69.1522	4.45978	60.4474	5.82048	81.4837	73.8	82.287	8.953	8.124	8.514	15.047	12.377	13.683	11.2614	18.618	1.96035	91.6895
Israel	ISR	2017	0.249808	22.0648	52.785	75.1486	56.2801	70.3291	4.34693	59.0659	6.02485	81.6155	73.803	81.259	7.761	6.604	7.151	15.046	12.167	13.575	11.4925	19.0719	1.93873	91.6701
Israel	ISR	2018	0.80506	22.3715	52.6043	75.2282	58.7438	70.2312	4.0039	57.3934	6.08777	81.9782	73.655	81.546	7.238	6.83	7.025	14.252	12.62	13.418	11.7013	19.4712	1.92662	91.6456
Israel	ISR	2019	0.817646	22.1367	52.1233	74.4992	56.3253	70.5181	3.7105	55.9445	6.08409	82.682	73.339	81.4	7.133	5.955	6.525	14.83	13.763	14.285	11.8855	19.8125	1.90898	91.6154
Israel	ISR	2020	-0.575255	23.3727	48.5604	72.2028	51.2367	70.3061	-2.02162	56.4272	6.50304	83.2931	71.666	80.166	7.939	7.366	7.645	16.307	15.831	16.064	12.0529	20.1174	1.76368	91.5788
Israel	ISR	2021	1.47965	22.1208	49.0081	71.3716	54.9017	70.7411	9.38837	58.9943	6.16909	83.2527	71.819	79.996	7.877	7.433	7.649	17.191	16.352	16.762	12.198	20.3781	1.68191	91.5354
Israel	ISR	2022	4.41163	20.8859	49.1902	70.5924	60.6449	70.3167	6.26326	57.6379	5.93497	83.5037	73.499	80.652	6.413	7.01	6.719	16.158	14.78	15.453	12.303	20.5415	1.96637	91.498
[truncated: 2,523 more rows]
