# Supplementary material
Source: Research Square preprint supplement (doi:10.21203/rs.3.rs-9229349/v1)
Supplement: Supplementary file 3 [file c60e30bc18cd557486fff558.xlsx]

## Sheet: List of economies
country	iso3c	Region	Income group	group	Lending category
Afghanistan	AFG	Middle East, North Africa, Afghanistan & Pakistan	Low income	1	IDA
Albania	ALB	Europe & Central Asia	Upper middle income	3	IBRD
Algeria	DZA	Middle East, North Africa, Afghanistan & Pakistan	Upper middle income	3	IBRD
American Samoa	ASM	East Asia & Pacific	High income	4
Andorra	AND	Europe & Central Asia	High income	4
Angola	AGO	Sub-Saharan Africa	Lower middle income	2	IBRD
Antigua and Barbuda	ATG	Latin America & Caribbean	High income	4	IBRD
Argentina	ARG	Latin America & Caribbean	Upper middle income	3	IBRD
Armenia	ARM	Europe & Central Asia	Upper middle income	3	IBRD
Aruba	ABW	Latin America & Caribbean	High income	4
Australia	AUS	East Asia & Pacific	High income	4
Austria	AUT	Europe & Central Asia	High income	4
Azerbaijan	AZE	Europe & Central Asia	Upper middle income	3	IBRD
Bahamas, The	BHS	Latin America & Caribbean	High income	4
Bahrain	BHR	Middle East, North Africa, Afghanistan & Pakistan	High income	4
Bangladesh	BGD	South Asia	Lower middle income	2	IDA
Barbados	BRB	Latin America & Caribbean	High income	4	IBRD
Belarus	BLR	Europe & Central Asia	Upper middle income	3	IBRD
Belgium	BEL	Europe & Central Asia	High income	4
Belize	BLZ	Latin America & Caribbean	Upper middle income	3	Blend
Benin	BEN	Sub-Saharan Africa	Lower middle income	2	IDA
Bermuda	BMU	North America	High income	4
Bhutan	BTN	South Asia	Lower middle income	2	IDA
Bolivia	BOL	Latin America & Caribbean	Lower middle income	2	IBRD
Bosnia and Herzegovina	BIH	Europe & Central Asia	Upper middle income	3	IBRD
Botswana	BWA	Sub-Saharan Africa	Upper middle income	3	IBRD
Brazil	BRA	Latin America & Caribbean	Upper middle income	3	IBRD
British Virgin Islands	VGB	Latin America & Caribbean	High income	4
Brunei Darussalam	BRN	East Asia & Pacific	High income	4
Bulgaria	BGR	Europe & Central Asia	High income	4	IBRD
Burkina Faso	BFA	Sub-Saharan Africa	Low income	1	IDA
Burundi	BDI	Sub-Saharan Africa	Low income	1	IDA
Cabo Verde	CPV	Sub-Saharan Africa	Upper middle income	3	Blend
Cambodia	KHM	East Asia & Pacific	Lower middle income	2	IDA
Cameroon	CMR	Sub-Saharan Africa	Lower middle income	2	Blend
Canada	CAN	North America	High income	4
Cayman Islands	CYM	Latin America & Caribbean	High income	4
Central African Republic	CAF	Sub-Saharan Africa	Low income	1	IDA
Chad	TCD	Sub-Saharan Africa	Low income	1	IDA
Channel Islands	CHI	Europe & Central Asia	High income	4
Chile	CHL	Latin America & Caribbean	High income	4	IBRD
China	CHN	East Asia & Pacific	Upper middle income	3	IBRD
Colombia	COL	Latin America & Caribbean	Upper middle income	3	IBRD
Comoros	COM	Sub-Saharan Africa	Lower middle income	2	IDA
Congo, Dem. Rep.	COD	Sub-Saharan Africa	Low income	1	IDA
Congo, Rep.	COG	Sub-Saharan Africa	Lower middle income	2	Blend
Costa Rica	CRI	Latin America & Caribbean	High income	4	IBRD
Côte d’Ivoire	CIV	Sub-Saharan Africa	Lower middle income	2	Blend
Croatia	HRV	Europe & Central Asia	High income	4	IBRD
Cuba	CUB	Latin America & Caribbean	Upper middle income	3
Curaçao	CUW	Latin America & Caribbean	High income	4
Cyprus	CYP	Europe & Central Asia	High income	4
Czechia	CZE	Europe & Central Asia	High income	4
Denmark	DNK	Europe & Central Asia	High income	4
Djibouti	DJI	Middle East, North Africa, Afghanistan & Pakistan	Lower middle income	2	IDA
Dominica	DMA	Latin America & Caribbean	Upper middle income	3	Blend
Dominican Republic	DOM	Latin America & Caribbean	Upper middle income	3	IBRD
Ecuador	ECU	Latin America & Caribbean	Upper middle income	3	IBRD
Egypt, Arab Rep.	EGY	Middle East, North Africa, Afghanistan & Pakistan	Lower middle income	2	IBRD
El Salvador	SLV	Latin America & Caribbean	Upper middle income	3	IBRD
Equatorial Guinea	GNQ	Sub-Saharan Africa	Upper middle income	3	IBRD
Eritrea	ERI	Sub-Saharan Africa	Low income	1	IDA
Estonia	EST	Europe & Central Asia	High income	4
Eswatini	SWZ	Sub-Saharan Africa	Lower middle income	2	Blend
Faroe Islands	FRO	Europe & Central Asia	High income	4
Fiji	FJI	East Asia & Pacific	Upper middle income	3	Blend
Finland	FIN	Europe & Central Asia	High income	4
France	FRA	Europe & Central Asia	High income	4
French Polynesia	PYF	East Asia & Pacific	High income	4
Gabon	GAB	Sub-Saharan Africa	Upper middle income	3	IBRD
Gambia, The	GMB	Sub-Saharan Africa	Low income	1	IDA
Georgia	GEO	Europe & Central Asia	Upper middle income	3	IBRD
Germany	DEU	Europe & Central Asia	High income	4
Ghana	GHA	Sub-Saharan Africa	Lower middle income	2	IDA
Gibraltar	GIB	Europe & Central Asia	High income	4
Greece	GRC	Europe & Central Asia	High income	4
Greenland	GRL	Europe & Central Asia	High income	4
Grenada	GRD	Latin America & Caribbean	Upper middle income	3	Blend
Guam	GUM	East Asia & Pacific	High income	4
Guatemala	GTM	Latin America & Caribbean	Upper middle income	3	IBRD
Guinea	GIN	Sub-Saharan Africa	Lower middle income	2	IDA
Guinea-Bissau	GNB	Sub-Saharan Africa	Low income	1	IDA
Guyana	GUY	Latin America & Caribbean	High income	4	IDA
Haiti	HTI	Latin America & Caribbean	Lower middle income	2	IDA
Honduras	HND	Latin America & Caribbean	Lower middle income	2	IDA
Hong Kong SAR, China	HKG	East Asia & Pacific	High income	4
Hungary	HUN	Europe & Central Asia	High income	4
Iceland	ISL	Europe & Central Asia	High income	4
India	IND	South Asia	Lower middle income	2	IBRD
Indonesia	IDN	East Asia & Pacific	Upper middle income	3	IBRD
Iran, Islamic Rep.	IRN	Middle East, North Africa, Afghanistan & Pakistan	Upper middle income	3	IBRD
Iraq	IRQ	Middle East, North Africa, Afghanistan & Pakistan	Upper middle income	3	IBRD
Ireland	IRL	Europe & Central Asia	High income	4
Isle of Man	IMN	Europe & Central Asia	High income	4
Israel	ISR	Middle East, North Africa, Afghanistan & Pakistan	High income	4
Italy	ITA	Europe & Central Asia	High income	4
Jamaica	JAM	Latin America & Caribbean	Upper middle income	3	IBRD
Japan	JPN	East Asia & Pacific	High income	4
Jordan	JOR	Middle East, North Africa, Afghanistan & Pakistan	Lower middle income	2	IBRD
Kazakhstan	KAZ	Europe & Central Asia	Upper middle income	3	IBRD
Kenya	KEN	Sub-Saharan Africa	Lower middle income	2	Blend
Kiribati	KIR	East Asia & Pacific	Lower middle income	2	IDA
Korea, Dem. People's Rep.	PRK	East Asia & Pacific	Low income	1
Korea, Rep.	KOR	East Asia & Pacific	High income	4
Kosovo	XKX	Europe & Central Asia	Upper middle income	3	IDA
Kuwait	KWT	Middle East, North Africa, Afghanistan & Pakistan	High income	4
Kyrgyz Republic	KGZ	Europe & Central Asia	Lower middle income	2	IDA
Lao PDR	LAO	East Asia & Pacific	Lower middle income	2	IDA
Latvia	LVA	Europe & Central Asia	High income	4
Lebanon	LBN	Middle East, North Africa, Afghanistan & Pakistan	Lower middle income	2	IBRD
Lesotho	LSO	Sub-Saharan Africa	Lower middle income	2	IDA
Liberia	LBR	Sub-Saharan Africa	Low income	1	IDA
Libya	LBY	Middle East, North Africa, Afghanistan & Pakistan	Upper middle income	3	IBRD
Liechtenstein	LIE	Europe & Central Asia	High income	4
Lithuania	LTU	Europe & Central Asia	High income	4
Luxembourg	LUX	Europe & Central Asia	High income	4
Macao SAR, China	MAC	East Asia & Pacific	High income	4
Madagascar	MDG	Sub-Saharan Africa	Low income	1	IDA
Malawi	MWI	Sub-Saharan Africa	Low income	1	IDA
Malaysia	MYS	East Asia & Pacific	Upper middle income	3	IBRD
Maldives	MDV	South Asia	Upper middle income	3	IDA
Mali	MLI	Sub-Saharan Africa	Low income	1	IDA
Malta	MLT	Middle East, North Africa, Afghanistan & Pakistan	High income	4
Marshall Islands	MHL	East Asia & Pacific	Upper middle income	3	IDA
Mauritania	MRT	Sub-Saharan Africa	Lower middle income	2	IDA
Mauritius	MUS	Sub-Saharan Africa	Upper middle income	3	IBRD
Mexico	MEX	Latin America & Caribbean	Upper middle income	3	IBRD
Micronesia, Fed. Sts.	FSM	East Asia & Pacific	Lower middle income	2	IDA
Moldova	MDA	Europe & Central Asia	Upper middle income	3	IBRD
Monaco	MCO	Europe & Central Asia	High income	4
Mongolia	MNG	East Asia & Pacific	Upper middle income	3	IBRD
Montenegro	MNE	Europe & Central Asia	Upper middle income	3	IBRD
Morocco	MAR	Middle East, North Africa, Afghanistan & Pakistan	Lower middle income	2	IBRD
Mozambique	MOZ	Sub-Saharan Africa	Low income	1	IDA
Myanmar	MMR	East Asia & Pacific	Lower middle income	2	IDA
Namibia	NAM	Sub-Saharan Africa	Lower middle income	2	IBRD
Nauru	NRU	East Asia & Pacific	High income	4	IBRD
Nepal	NPL	South Asia	Lower middle income	2	IDA
Netherlands	NLD	Europe & Central Asia	High income	4
New Caledonia	NCL	East Asia & Pacific	High income	4
New Zealand	NZL	East Asia & Pacific	High income	4
Nicaragua	NIC	Latin America & Caribbean	Lower middle income	2	IDA
Niger	NER	Sub-Saharan Africa	Low income	1	IDA
Nigeria	NGA	Sub-Saharan Africa	Lower middle income	2	Blend
North Macedonia	MKD	Europe & Central Asia	Upper middle income	3	IBRD
Northern Mariana Islands	MNP	East Asia & Pacific	High income	4
Norway	NOR	Europe & Central Asia	High income	4
Oman	OMN	Middle East, North Africa, Afghanistan & Pakistan	High income	4
Pakistan	PAK	Middle East, North Africa, Afghanistan & Pakistan	Lower middle income	2	Blend
Palau	PLW	East Asia & Pacific	High income	4	IBRD
Panama	PAN	Latin America & Caribbean	High income	4	IBRD
Papua New Guinea	PNG	East Asia & Pacific	Lower middle income	2	Blend
Paraguay	PRY	Latin America & Caribbean	Upper middle income	3	IBRD
Peru	PER	Latin America & Caribbean	Upper middle income	3	IBRD
Philippines	PHL	East Asia & Pacific	Lower middle income	2	IBRD
Poland	POL	Europe & Central Asia	High income	4	IBRD
Portugal	PRT	Europe & Central Asia	High income	4
Puerto Rico (U.S.)	PRI	Latin America & Caribbean	High income	4
Qatar	QAT	Middle East, North Africa, Afghanistan & Pakistan	High income	4
Romania	ROU	Europe & Central Asia	High income	4	IBRD
Russian Federation	RUS	Europe & Central Asia	High income	4	IBRD
Rwanda	RWA	Sub-Saharan Africa	Low income	1	IDA
Samoa	WSM	East Asia & Pacific	Upper middle income	3	IDA
San Marino	SMR	Europe & Central Asia	High income	4
São Tomé and Príncipe	STP	Sub-Saharan Africa	Lower middle income	2	IDA
Saudi Arabia	SAU	Middle East, North Africa, Afghanistan & Pakistan	High income	4
Senegal	SEN	Sub-Saharan Africa	Lower middle income	2	IDA
Serbia	SRB	Europe & Central Asia	Upper middle income	3	IBRD
Seychelles	SYC	Sub-Saharan Africa	High income	4	IBRD
Sierra Leone	SLE	Sub-Saharan Africa	Low income	1	IDA
Singapore	SGP	East Asia & Pacific	High income	4
Sint Maarten (Dutch part)	SXM	Latin America & Caribbean	High income	4
Slovak Republic	SVK	Europe & Central Asia	High income	4
Slovenia	SVN	Europe & Central Asia	High income	4
Solomon Islands	SLB	East Asia & Pacific	Lower middle income	2	IDA
Somalia, Fed. Rep.	SOM	Sub-Saharan Africa	Low income	1	IDA
South Africa	ZAF	Sub-Saharan Africa	Upper middle income	3	IBRD
South Sudan	SSD	Sub-Saharan Africa	Low income	1	IDA
Spain	ESP	Europe & Central Asia	High income	4
Sri Lanka	LKA	South Asia	Lower middle income	2	IDA
St. Kitts and Nevis	KNA	Latin America & Caribbean	High income	4	IBRD
St. Lucia	LCA	Latin America & Caribbean	Upper middle income	3	Blend
St. Martin (French part)	MAF	Latin America & Caribbean	High income	4
St. Vincent and the Grenadines	VCT	Latin America & Caribbean	Upper middle income	3	Blend
Sudan	SDN	Sub-Saharan Africa	Low income	1	IDA
Suriname	SUR	Latin America & Caribbean	Upper middle income	3	Blend
Sweden	SWE	Europe & Central Asia	High income	4
Switzerland	CHE	Europe & Central Asia	High income	4
Syrian Arab Republic	SYR	Middle East, North Africa, Afghanistan & Pakistan	Low income	1	IDA
Taiwan, China	TWN	East Asia & Pacific	High income	4
Tajikistan	TJK	Europe & Central Asia	Lower middle income	2	IDA
Tanzania	TZA	Sub-Saharan Africa	Lower middle income	2	IDA
Thailand	THA	East Asia & Pacific	Upper middle income	3	IBRD
Timor-Leste	TLS	East Asia & Pacific	Lower middle income	2	Blend
Togo	TGO	Sub-Saharan Africa	Low income	1	IDA
Tonga	TON	East Asia & Pacific	Upper middle income	3	IDA
Trinidad and Tobago	TTO	Latin America & Caribbean	High income	4	IBRD
Tunisia	TUN	Middle East, North Africa, Afghanistan & Pakistan	Lower middle income	2	IBRD
Türkiye	TUR	Europe & Central Asia	Upper middle income	3	IBRD
Turkmenistan	TKM	Europe & Central Asia	Upper middle income	3	IBRD
Turks and Caicos Islands	TCA	Latin America & Caribbean	High income	4
Tuvalu	TUV	East Asia & Pacific	Upper middle income	3	IDA
Uganda	UGA	Sub-Saharan Africa	Low income	1	IDA
Ukraine	UKR	Europe & Central Asia	Upper middle income	3	IBRD
United Arab Emirates	ARE	Middle East, North Africa, Afghanistan & Pakistan	High income	4
United Kingdom	GBR	Europe & Central Asia	High income	4
United States	USA	North America	High income	4
Uruguay	URY	Latin America & Caribbean	High income	4	IBRD
Uzbekistan	UZB	Europe & Central Asia	Lower middle income	2	Blend
Vanuatu	VUT	East Asia & Pacific	Lower middle income	2	IDA
Vietnam	VNM	East Asia & Pacific	Lower middle income	2	IBRD
Virgin Islands (U.S.)	VIR	Latin America & Caribbean	High income	4
West Bank and Gaza	PSE	Middle East, North Africa, Afghanistan & Pakistan	Lower middle income	2
Yemen, Rep.	YEM	Middle East, North Africa, Afghanistan & Pakistan	Low income	1	IDA
Zambia	ZMB	Sub-Saharan Africa	Lower middle income	2	IDA
Zimbabwe	ZWE	Sub-Saharan Africa	Lower middle income	2	Blend

## Sheet: composition
WB_Group_Code	WB_Group_Name	WB_Country_Code	WB_Country_Name
AFE	Africa Eastern and Southern	AGO	Angola
AFE	Africa Eastern and Southern	BWA	Botswana
AFE	Africa Eastern and Southern	BDI	Burundi
AFE	Africa Eastern and Southern	COM	Comoros
AFE	Africa Eastern and Southern	COD	Congo, Dem. Rep.
AFE	Africa Eastern and Southern	ERI	Eritrea
AFE	Africa Eastern and Southern	SWZ	Eswatini
AFE	Africa Eastern and Southern	ETH	Ethiopia
AFE	Africa Eastern and Southern	KEN	Kenya
AFE	Africa Eastern and Southern	LSO	Lesotho
AFE	Africa Eastern and Southern	MDG	Madagascar
AFE	Africa Eastern and Southern	MWI	Malawi
AFE	Africa Eastern and Southern	MUS	Mauritius
AFE	Africa Eastern and Southern	MOZ	Mozambique
AFE	Africa Eastern and Southern	NAM	Namibia
AFE	Africa Eastern and Southern	RWA	Rwanda
AFE	Africa Eastern and Southern	STP	São Tomé and Príncipe
AFE	Africa Eastern and Southern	SYC	Seychelles
AFE	Africa Eastern and Southern	SOM	Somalia, Fed. Rep.
AFE	Africa Eastern and Southern	ZAF	South Africa
AFE	Africa Eastern and Southern	SSD	South Sudan
AFE	Africa Eastern and Southern	SDN	Sudan
AFE	Africa Eastern and Southern	TZA	Tanzania
AFE	Africa Eastern and Southern	UGA	Uganda
AFE	Africa Eastern and Southern	ZMB	Zambia
AFE	Africa Eastern and Southern	ZWE	Zimbabwe
AFW	Africa Western and Central	BEN	Benin
AFW	Africa Western and Central	BFA	Burkina Faso
AFW	Africa Western and Central	CPV	Cabo Verde
AFW	Africa Western and Central	CMR	Cameroon
AFW	Africa Western and Central	CAF	Central African Republic
AFW	Africa Western and Central	TCD	Chad
AFW	Africa Western and Central	COG	Congo, Rep.
AFW	Africa Western and Central	CIV	Côte d’Ivoire
AFW	Africa Western and Central	GNQ	Equatorial Guinea
AFW	Africa Western and Central	GAB	Gabon
AFW	Africa Western and Central	GMB	Gambia, The
AFW	Africa Western and Central	GHA	Ghana
AFW	Africa Western and Central	GIN	Guinea
AFW	Africa Western and Central	GNB	Guinea-Bissau
AFW	Africa Western and Central	LBR	Liberia
AFW	Africa Western and Central	MLI	Mali
AFW	Africa Western and Central	MRT	Mauritania
AFW	Africa Western and Central	NER	Niger
AFW	Africa Western and Central	NGA	Nigeria
AFW	Africa Western and Central	SEN	Senegal
AFW	Africa Western and Central	SLE	Sierra Leone
AFW	Africa Western and Central	TGO	Togo
ARB	Arab World	DZA	Algeria
ARB	Arab World	BHR	Bahrain
ARB	Arab World	COM	Comoros
ARB	Arab World	DJI	Djibouti
ARB	Arab World	EGY	Egypt, Arab Rep.
ARB	Arab World	IRQ	Iraq
ARB	Arab World	JOR	Jordan
ARB	Arab World	KWT	Kuwait
ARB	Arab World	LBN	Lebanon
ARB	Arab World	LBY	Libya
ARB	Arab World	MRT	Mauritania
ARB	Arab World	MAR	Morocco
ARB	Arab World	OMN	Oman
ARB	Arab World	QAT	Qatar
ARB	Arab World	SAU	Saudi Arabia
ARB	Arab World	SOM	Somalia, Fed. Rep.
ARB	Arab World	SDN	Sudan
ARB	Arab World	SYR	Syrian Arab Republic
ARB	Arab World	TUN	Tunisia
ARB	Arab World	ARE	United Arab Emirates
ARB	Arab World	PSE	West Bank and Gaza
ARB	Arab World	YEM	Yemen, Rep.
CSS	Caribbean small states	ATG	Antigua and Barbuda
CSS	Caribbean small states	BHS	Bahamas, The
CSS	Caribbean small states	BRB	Barbados
CSS	Caribbean small states	BLZ	Belize
CSS	Caribbean small states	DMA	Dominica
CSS	Caribbean small states	GRD	Grenada
CSS	Caribbean small states	GUY	Guyana
CSS	Caribbean small states	KNA	St. Kitts and Nevis
CSS	Caribbean small states	LCA	St. Lucia
CSS	Caribbean small states	VCT	St. Vincent and the Grenadines
CSS	Caribbean small states	SUR	Suriname
CSS	Caribbean small states	TTO	Trinidad and Tobago
CEB	Central Europe and the Baltics	BGR	Bulgaria
CEB	Central Europe and the Baltics	HRV	Croatia
CEB	Central Europe and the Baltics	CZE	Czechia
CEB	Central Europe and the Baltics	EST	Estonia
CEB	Central Europe and the Baltics	HUN	Hungary
CEB	Central Europe and the Baltics	LVA	Latvia
CEB	Central Europe and the Baltics	LTU	Lithuania
CEB	Central Europe and the Baltics	POL	Poland
CEB	Central Europe and the Baltics	ROU	Romania
CEB	Central Europe and the Baltics	SVK	Slovak Republic
CEB	Central Europe and the Baltics	SVN	Slovenia
EAR	Early-demographic dividend	DZA	Algeria
EAR	Early-demographic dividend	ARG	Argentina
EAR	Early-demographic dividend	BHR	Bahrain
EAR	Early-demographic dividend	BGD	Bangladesh
EAR	Early-demographic dividend	BLZ	Belize
EAR	Early-demographic dividend	BTN	Bhutan
EAR	Early-demographic dividend	BOL	Bolivia
EAR	Early-demographic dividend	BWA	Botswana
EAR	Early-demographic dividend	CPV	Cabo Verde
EAR	Early-demographic dividend	KHM	Cambodia
EAR	Early-demographic dividend	DJI	Djibouti
EAR	Early-demographic dividend	DOM	Dominican Republic
EAR	Early-demographic dividend	ECU	Ecuador
EAR	Early-demographic dividend	EGY	Egypt, Arab Rep.
EAR	Early-demographic dividend	SLV	El Salvador
EAR	Early-demographic dividend	SWZ	Eswatini
EAR	Early-demographic dividend	ETH	Ethiopia
EAR	Early-demographic dividend	GAB	Gabon
EAR	Early-demographic dividend	GHA	Ghana
EAR	Early-demographic dividend	GRD	Grenada
EAR	Early-demographic dividend	GTM	Guatemala
EAR	Early-demographic dividend	HTI	Haiti
EAR	Early-demographic dividend	HND	Honduras
EAR	Early-demographic dividend	IND	India
EAR	Early-demographic dividend	IDN	Indonesia
EAR	Early-demographic dividend	IRN	Iran, Islamic Rep.
EAR	Early-demographic dividend	ISR	Israel
EAR	Early-demographic dividend	JOR	Jordan
EAR	Early-demographic dividend	KIR	Kiribati
EAR	Early-demographic dividend	LAO	Lao PDR
EAR	Early-demographic dividend	LSO	Lesotho
EAR	Early-demographic dividend	LBY	Libya
EAR	Early-demographic dividend	MDV	Maldives
EAR	Early-demographic dividend	MEX	Mexico
EAR	Early-demographic dividend	FSM	Micronesia, Fed. Sts.
EAR	Early-demographic dividend	MMR	Myanmar
EAR	Early-demographic dividend	NAM	Namibia
EAR	Early-demographic dividend	NPL	Nepal
EAR	Early-demographic dividend	NIC	Nicaragua
EAR	Early-demographic dividend	PAK	Pakistan
EAR	Early-demographic dividend	PAN	Panama
EAR	Early-demographic dividend	PNG	Papua New Guinea
EAR	Early-demographic dividend	PRY	Paraguay
EAR	Early-demographic dividend	PER	Peru
EAR	Early-demographic dividend	PHL	Philippines
EAR	Early-demographic dividend	RWA	Rwanda
EAR	Early-demographic dividend	WSM	Samoa
EAR	Early-demographic dividend	SAU	Saudi Arabia
EAR	Early-demographic dividend	SLB	Solomon Islands
EAR	Early-demographic dividend	ZAF	South Africa
EAR	Early-demographic dividend	SUR	Suriname
EAR	Early-demographic dividend	SYR	Syrian Arab Republic
EAR	Early-demographic dividend	TJK	Tajikistan
EAR	Early-demographic dividend	TON	Tonga
EAR	Early-demographic dividend	TUR	Türkiye
EAR	Early-demographic dividend	TKM	Turkmenistan
EAR	Early-demographic dividend	UZB	Uzbekistan
EAR	Early-demographic dividend	VUT	Vanuatu
EAR	Early-demographic dividend	VEN	Venezuela, RB
EAR	Early-demographic dividend	PSE	West Bank and Gaza
EAR	Early-demographic dividend	YEM	Yemen, Rep.
EAR	Early-demographic dividend	ZWE	Zimbabwe
EAS	East Asia & Pacific	ASM	American Samoa
EAS	East Asia & Pacific	AUS	Australia
EAS	East Asia & Pacific	BRN	Brunei Darussalam
EAS	East Asia & Pacific	KHM	Cambodia
EAS	East Asia & Pacific	CHN	China
EAS	East Asia & Pacific	FJI	Fiji
EAS	East Asia & Pacific	PYF	French Polynesia
EAS	East Asia & Pacific	GUM	Guam
EAS	East Asia & Pacific	HKG	Hong Kong SAR, China
EAS	East Asia & Pacific	IDN	Indonesia
EAS	East Asia & Pacific	JPN	Japan
EAS	East Asia & Pacific	KIR	Kiribati
EAS	East Asia & Pacific	PRK	Korea, Dem. People's Rep.
EAS	East Asia & Pacific	KOR	Korea, Rep.
EAS	East Asia & Pacific	LAO	Lao PDR
EAS	East Asia & Pacific	MAC	Macao SAR, China
EAS	East Asia & Pacific	MYS	Malaysia
EAS	East Asia & Pacific	MHL	Marshall Islands
EAS	East Asia & Pacific	FSM	Micronesia, Fed. Sts.
EAS	East Asia & Pacific	MNG	Mongolia
EAS	East Asia & Pacific	MMR	Myanmar
EAS	East Asia & Pacific	NRU	Nauru
EAS	East Asia & Pacific	NCL	New Caledonia
EAS	East Asia & Pacific	NZL	New Zealand
EAS	East Asia & Pacific	MNP	Northern Mariana Islands
EAS	East Asia & Pacific	PLW	Palau
EAS	East Asia & Pacific	PNG	Papua New Guinea
EAS	East Asia & Pacific	PHL	Philippines
EAS	East Asia & Pacific	WSM	Samoa
EAS	East Asia & Pacific	SGP	Singapore
EAS	East Asia & Pacific	SLB	Solomon Islands
EAS	East Asia & Pacific	TWN	Taiwan, China
EAS	East Asia & Pacific	THA	Thailand
EAS	East Asia & Pacific	TLS	Timor-Leste
EAS	East Asia & Pacific	TON	Tonga
EAS	East Asia & Pacific	TUV	Tuvalu
EAS	East Asia & Pacific	VUT	Vanuatu
EAS	East Asia & Pacific	VNM	Vietnam
EAP	East Asia & Pacific (excluding high income)	KHM	Cambodia
EAP	East Asia & Pacific (excluding high income)	CHN	China
EAP	East Asia & Pacific (excluding high income)	FJI	Fiji
EAP	East Asia & Pacific (excluding high income)	IDN	Indonesia
EAP	East Asia & Pacific (excluding high income)	KIR	Kiribati
EAP	East Asia & Pacific (excluding high income)	PRK	Korea, Dem. People's Rep.
EAP	East Asia & Pacific (excluding high income)	LAO	Lao PDR
EAP	East Asia & Pacific (excluding high income)	MYS	Malaysia
EAP	East Asia & Pacific (excluding high income)	MHL	Marshall Islands
EAP	East Asia & Pacific (excluding high income)	FSM	Micronesia, Fed. Sts.
EAP	East Asia & Pacific (excluding high income)	MNG	Mongolia
EAP	East Asia & Pacific (excluding high income)	MMR	Myanmar
EAP	East Asia & Pacific (excluding high income)	PNG	Papua New Guinea
EAP	East Asia & Pacific (excluding high income)	PHL	Philippines
EAP	East Asia & Pacific (excluding high income)	WSM	Samoa
EAP	East Asia & Pacific (excluding high income)	SLB	Solomon Islands
EAP	East Asia & Pacific (excluding high income)	THA	Thailand
EAP	East Asia & Pacific (excluding high income)	TLS	Timor-Leste
EAP	East Asia & Pacific (excluding high income)	TON	Tonga
EAP	East Asia & Pacific (excluding high income)	TUV	Tuvalu
EAP	East Asia & Pacific (excluding high income)	VUT	Vanuatu
EAP	East Asia & Pacific (excluding high income)	VNM	Vietnam
TEA	East Asia & Pacific (IDA & IBRD)	KHM	Cambodia
TEA	East Asia & Pacific (IDA & IBRD)	CHN	China
TEA	East Asia & Pacific (IDA & IBRD)	FJI	Fiji
TEA	East Asia & Pacific (IDA & IBRD)	IDN	Indonesia
TEA	East Asia & Pacific (IDA & IBRD)	KIR	Kiribati
TEA	East Asia & Pacific (IDA & IBRD)	LAO	Lao PDR
TEA	East Asia & Pacific (IDA & IBRD)	MYS	Malaysia
TEA	East Asia & Pacific (IDA & IBRD)	MHL	Marshall Islands
TEA	East Asia & Pacific (IDA & IBRD)	FSM	Micronesia, Fed. Sts.
TEA	East Asia & Pacific (IDA & IBRD)	MNG	Mongolia
TEA	East Asia & Pacific (IDA & IBRD)	MMR	Myanmar
TEA	East Asia & Pacific (IDA & IBRD)	NRU	Nauru
TEA	East Asia & Pacific (IDA & IBRD)	PLW	Palau
TEA	East Asia & Pacific (IDA & IBRD)	PNG	Papua New Guinea
TEA	East Asia & Pacific (IDA & IBRD)	PHL	Philippines
TEA	East Asia & Pacific (IDA & IBRD)	WSM	Samoa
TEA	East Asia & Pacific (IDA & IBRD)	SLB	Solomon Islands
TEA	East Asia & Pacific (IDA & IBRD)	THA	Thailand
TEA	East Asia & Pacific (IDA & IBRD)	TLS	Timor-Leste
TEA	East Asia & Pacific (IDA & IBRD)	TON	Tonga
TEA	East Asia & Pacific (IDA & IBRD)	TUV	Tuvalu
TEA	East Asia & Pacific (IDA & IBRD)	VUT	Vanuatu
TEA	East Asia & Pacific (IDA & IBRD)	VNM	Vietnam
EMU	Euro area	AUT	Austria
EMU	Euro area	BEL	Belgium
EMU	Euro area	HRV	Croatia
EMU	Euro area	CYP	Cyprus
EMU	Euro area	EST	Estonia
EMU	Euro area	FIN	Finland
EMU	Euro area	FRA	France
EMU	Euro area	DEU	Germany
EMU	Euro area	GRC	Greece
EMU	Euro area	IRL	Ireland
EMU	Euro area	ITA	Italy
EMU	Euro area	LVA	Latvia
EMU	Euro area	LTU	Lithuania
EMU	Euro area	LUX	Luxembourg
EMU	Euro area	MLT	Malta
EMU	Euro area	NLD	Netherlands
EMU	Euro area	PRT	Portugal
EMU	Euro area	SVK	Slovak Republic
EMU	Euro area	SVN	Slovenia
EMU	Euro area	ESP	Spain
ECS	Europe & Central Asia	ALB	Albania
ECS	Europe & Central Asia	AND	Andorra
ECS	Europe & Central Asia	ARM	Armenia
ECS	Europe & Central Asia	AUT	Austria
ECS	Europe & Central Asia	AZE	Azerbaijan
ECS	Europe & Central Asia	BLR	Belarus
ECS	Europe & Central Asia	BEL	Belgium
ECS	Europe & Central Asia	BIH	Bosnia and Herzegovina
ECS	Europe & Central Asia	BGR	Bulgaria
ECS	Europe & Central Asia	CHI	Channel Islands
ECS	Europe & Central Asia	HRV	Croatia
ECS	Europe & Central Asia	CYP	Cyprus
ECS	Europe & Central Asia	CZE	Czechia
ECS	Europe & Central Asia	DNK	Denmark
ECS	Europe & Central Asia	EST	Estonia
ECS	Europe & Central Asia	FRO	Faroe Islands
ECS	Europe & Central Asia	FIN	Finland
ECS	Europe & Central Asia	FRA	France
ECS	Europe & Central Asia	GEO	Georgia
ECS	Europe & Central Asia	DEU	Germany
ECS	Europe & Central Asia	GIB	Gibraltar
ECS	Europe & Central Asia	GRC	Greece
ECS	Europe & Central Asia	GRL	Greenland
ECS	Europe & Central Asia	HUN	Hungary
ECS	Europe & Central Asia	ISL	Iceland
ECS	Europe & Central Asia	IRL	Ireland
ECS	Europe & Central Asia	IMN	Isle of Man
ECS	Europe & Central Asia	ITA	Italy
ECS	Europe & Central Asia	KAZ	Kazakhstan
ECS	Europe & Central Asia	XKX	Kosovo
ECS	Europe & Central Asia	KGZ	Kyrgyz Republic
ECS	Europe & Central Asia	LVA	Latvia
ECS	Europe & Central Asia	LIE	Liechtenstein
ECS	Europe & Central Asia	LTU	Lithuania
ECS	Europe & Central Asia	LUX	Luxembourg
ECS	Europe & Central Asia	MDA	Moldova
ECS	Europe & Central Asia	MCO	Monaco
ECS	Europe & Central Asia	MNE	Montenegro
ECS	Europe & Central Asia	NLD	Netherlands
ECS	Europe & Central Asia	MKD	North Macedonia
ECS	Europe & Central Asia	NOR	Norway
ECS	Europe & Central Asia	POL	Poland
ECS	Europe & Central Asia	PRT	Portugal
ECS	Europe & Central Asia	ROU	Romania
ECS	Europe & Central Asia	RUS	Russian Federation
ECS	Europe & Central Asia	SMR	San Marino
ECS	Europe & Central Asia	SRB	Serbia
ECS	Europe & Central Asia	SVK	Slovak Republic
ECS	Europe & Central Asia	SVN	Slovenia
ECS	Europe & Central Asia	ESP	Spain
ECS	Europe & Central Asia	SWE	Sweden
ECS	Europe & Central Asia	CHE	Switzerland
ECS	Europe & Central Asia	TJK	Tajikistan
ECS	Europe & Central Asia	TUR	Türkiye
ECS	Europe & Central Asia	TKM	Turkmenistan
ECS	Europe & Central Asia	UKR	Ukraine
ECS	Europe & Central Asia	GBR	United Kingdom
ECS	Europe & Central Asia	UZB	Uzbekistan
ECA	Europe & Central Asia (excluding high income)	ALB	Albania
ECA	Europe & Central Asia (excluding high income)	ARM	Armenia
ECA	Europe & Central Asia (excluding high income)	AZE	Azerbaijan
ECA	Europe & Central Asia (excluding high income)	BLR	Belarus
ECA	Europe & Central Asia (excluding high income)	BIH	Bosnia and Herzegovina
ECA	Europe & Central Asia (excluding high income)	GEO	Georgia
ECA	Europe & Central Asia (excluding high income)	KAZ	Kazakhstan
ECA	Europe & Central Asia (excluding high income)	XKX	Kosovo
ECA	Europe & Central Asia (excluding high income)	KGZ	Kyrgyz Republic
ECA	Europe & Central Asia (excluding high income)	MDA	Moldova
ECA	Europe & Central Asia (excluding high income)	MNE	Montenegro
ECA	Europe & Central Asia (excluding high income)	MKD	North Macedonia
ECA	Europe & Central Asia (excluding high income)	SRB	Serbia
ECA	Europe & Central Asia (excluding high income)	TJK	Tajikistan
ECA	Europe & Central Asia (excluding high income)	TUR	Türkiye
ECA	Europe & Central Asia (excluding high income)	TKM	Turkmenistan
ECA	Europe & Central Asia (excluding high income)	UKR	Ukraine
ECA	Europe & Central Asia (excluding high income)	UZB	Uzbekistan
TEC	Europe & Central Asia (IDA & IBRD)	ALB	Albania
TEC	Europe & Central Asia (IDA & IBRD)	ARM	Armenia
TEC	Europe & Central Asia (IDA & IBRD)	AZE	Azerbaijan
TEC	Europe & Central Asia (IDA & IBRD)	BLR	Belarus
TEC	Europe & Central Asia (IDA & IBRD)	BIH	Bosnia and Herzegovina
TEC	Europe & Central Asia (IDA & IBRD)	BGR	Bulgaria
TEC	Europe & Central Asia (IDA & IBRD)	HRV	Croatia
TEC	Europe & Central Asia (IDA & IBRD)	GEO	Georgia
TEC	Europe & Central Asia (IDA & IBRD)	KAZ	Kazakhstan
TEC	Europe & Central Asia (IDA & IBRD)	XKX	Kosovo
TEC	Europe & Central Asia (IDA & IBRD)	KGZ	Kyrgyz Republic
TEC	Europe & Central Asia (IDA & IBRD)	MDA	Moldova
TEC	Europe & Central Asia (IDA & IBRD)	MNE	Montenegro
TEC	Europe & Central Asia (IDA & IBRD)	MKD	North Macedonia
TEC	Europe & Central Asia (IDA & IBRD)	POL	Poland
TEC	Europe & Central Asia (IDA & IBRD)	ROU	Romania
TEC	Europe & Central Asia (IDA & IBRD)	RUS	Russian Federation
TEC	Europe & Central Asia (IDA & IBRD)	SRB	Serbia
TEC	Europe & Central Asia (IDA & IBRD)	TJK	Tajikistan
TEC	Europe & Central Asia (IDA & IBRD)	TUR	Türkiye
TEC	Europe & Central Asia (IDA & IBRD)	TKM	Turkmenistan
TEC	Europe & Central Asia (IDA & IBRD)	UKR	Ukraine
TEC	Europe & Central Asia (IDA & IBRD)	UZB	Uzbekistan
EUU	European Union	AUT	Austria
EUU	European Union	BEL	Belgium
EUU	European Union	BGR	Bulgaria
EUU	European Union	HRV	Croatia
EUU	European Union	CYP	Cyprus
EUU	European Union	CZE	Czechia
EUU	European Union	DNK	Denmark
EUU	European Union	EST	Estonia
EUU	European Union	FIN	Finland
EUU	European Union	FRA	France
EUU	European Union	DEU	Germany
EUU	European Union	GRC	Greece
EUU	European Union	HUN	Hungary
EUU	European Union	IRL	Ireland
EUU	European Union	ITA	Italy
EUU	European Union	LVA	Latvia
EUU	European Union	LTU	Lithuania
EUU	European Union	LUX	Luxembourg
EUU	European Union	MLT	Malta
EUU	European Union	NLD	Netherlands
EUU	European Union	POL	Poland
EUU	European Union	PRT	Portugal
EUU	European Union	ROU	Romania
EUU	European Union	SVK	Slovak Republic
EUU	European Union	SVN	Slovenia
EUU	European Union	ESP	Spain
EUU	European Union	SWE	Sweden
FCS	Fragile and conflict affected situations	AFG	Afghanistan
FCS	Fragile and conflict affected situations	BFA	Burkina Faso
FCS	Fragile and conflict affected situations	BDI	Burundi
FCS	Fragile and conflict affected situations	CMR	Cameroon
FCS	Fragile and conflict affected situations	CAF	Central African Republic
FCS	Fragile and conflict affected situations	TCD	Chad
FCS	Fragile and conflict affected situations	COM	Comoros
FCS	Fragile and conflict affected situations	COD	Congo, Dem. Rep.
FCS	Fragile and conflict affected situations	COG	Congo, Rep.
FCS	Fragile and conflict affected situations	ERI	Eritrea
FCS	Fragile and conflict affected situations	ETH	Ethiopia
FCS	Fragile and conflict affected situations	GNB	Guinea-Bissau
FCS	Fragile and conflict affected situations	HTI	Haiti
FCS	Fragile and conflict affected situations	IRQ	Iraq
FCS	Fragile and conflict affected situations	KIR	Kiribati
FCS	Fragile and conflict affected situations	LBN	Lebanon
FCS	Fragile and conflict affected situations	LBY	Libya
FCS	Fragile and conflict affected situations	MLI	Mali
FCS	Fragile and conflict affected situations	MHL	Marshall Islands
FCS	Fragile and conflict affected situations	FSM	Micronesia, Fed. Sts.
FCS	Fragile and conflict affected situations	MOZ	Mozambique
FCS	Fragile and conflict affected situations	MMR	Myanmar
FCS	Fragile and conflict affected situations	NER	Niger
FCS	Fragile and conflict affected situations	NGA	Nigeria
FCS	Fragile and conflict affected situations	PNG	Papua New Guinea
FCS	Fragile and conflict affected situations	STP	São Tomé and Príncipe
FCS	Fragile and conflict affected situations	SLB	Solomon Islands
FCS	Fragile and conflict affected situations	SOM	Somalia, Fed. Rep.
FCS	Fragile and conflict affected situations	SSD	South Sudan
FCS	Fragile and conflict affected situations	SDN	Sudan
FCS	Fragile and conflict affected situations	SYR	Syrian Arab Republic
FCS	Fragile and conflict affected situations	TLS	Timor-Leste
FCS	Fragile and conflict affected situations	TUV	Tuvalu
FCS	Fragile and conflict affected situations	UKR	Ukraine
FCS	Fragile and conflict affected situations	VEN	Venezuela, RB
FCS	Fragile and conflict affected situations	PSE	West Bank and Gaza
FCS	Fragile and conflict affected situations	YEM	Yemen, Rep.
FCS	Fragile and conflict affected situations	ZWE	Zimbabwe
HPC	Heavily indebted poor countries (HIPC)	AFG	Afghanistan
HPC	Heavily indebted poor countries (HIPC)	BEN	Benin
HPC	Heavily indebted poor countries (HIPC)	BOL	Bolivia
HPC	Heavily indebted poor countries (HIPC)	BFA	Burkina Faso
HPC	Heavily indebted poor countries (HIPC)	BDI	Burundi
HPC	Heavily indebted poor countries (HIPC)	CMR	Cameroon
HPC	Heavily indebted poor countries (HIPC)	CAF	Central African Republic
HPC	Heavily indebted poor countries (HIPC)	TCD	Chad
HPC	Heavily indebted poor countries (HIPC)	COM	Comoros
HPC	Heavily indebted poor countries (HIPC)	COD	Congo, Dem. Rep.
HPC	Heavily indebted poor countries (HIPC)	COG	Congo, Rep.
HPC	Heavily indebted poor countries (HIPC)	CIV	Côte d’Ivoire
HPC	Heavily indebted poor countries (HIPC)	ERI	Eritrea
HPC	Heavily indebted poor countries (HIPC)	ETH	Ethiopia
HPC	Heavily indebted poor countries (HIPC)	GMB	Gambia, The
HPC	Heavily indebted poor countries (HIPC)	GHA	Ghana
HPC	Heavily indebted poor countries (HIPC)	GIN	Guinea
HPC	Heavily indebted poor countries (HIPC)	GNB	Guinea-Bissau
HPC	Heavily indebted poor countries (HIPC)	GUY	Guyana
HPC	Heavily indebted poor countries (HIPC)	HTI	Haiti
HPC	Heavily indebted poor countries (HIPC)	HND	Honduras
HPC	Heavily indebted poor countries (HIPC)	LBR	Liberia
HPC	Heavily indebted poor countries (HIPC)	MDG	Madagascar
HPC	Heavily indebted poor countries (HIPC)	MWI	Malawi
HPC	Heavily indebted poor countries (HIPC)	MLI	Mali
HPC	Heavily indebted poor countries (HIPC)	MRT	Mauritania
HPC	Heavily indebted poor countries (HIPC)	MOZ	Mozambique
HPC	Heavily indebted poor countries (HIPC)	NIC	Nicaragua
HPC	Heavily indebted poor countries (HIPC)	NER	Niger
HPC	Heavily indebted poor countries (HIPC)	RWA	Rwanda
HPC	Heavily indebted poor countries (HIPC)	STP	São Tomé and Príncipe
HPC	Heavily indebted poor countries (HIPC)	SEN	Senegal
HPC	Heavily indebted poor countries (HIPC)	SLE	Sierra Leone
HPC	Heavily indebted poor countries (HIPC)	SOM	Somalia, Fed. Rep.
HPC	Heavily indebted poor countries (HIPC)	SDN	Sudan
HPC	Heavily indebted poor countries (HIPC)	TZA	Tanzania
HPC	Heavily indebted poor countries (HIPC)	TGO	Togo
HPC	Heavily indebted poor countries (HIPC)	UGA	Uganda
HPC	Heavily indebted poor countries (HIPC)	ZMB	Zambia
HIC	High income	ASM	American Samoa
HIC	High income	AND	Andorra
HIC	High income	ATG	Antigua and Barbuda
HIC	High income	ABW	Aruba
HIC	High income	AUS	Australia
HIC	High income	AUT	Austria
HIC	High income	BHS	Bahamas, The
HIC	High income	BHR	Bahrain
HIC	High income	BRB	Barbados
HIC	High income	BEL	Belgium
HIC	High income	BMU	Bermuda
HIC	High income	VGB	British Virgin Islands
HIC	High income	BRN	Brunei Darussalam
HIC	High income	BGR	Bulgaria
HIC	High income	CAN	Canada
HIC	High income	CYM	Cayman Islands
HIC	High income	CHI	Channel Islands
HIC	High income	CHL	Chile
HIC	High income	CRI	Costa Rica
HIC	High income	HRV	Croatia
HIC	High income	CUW	Curaçao
HIC	High income	CYP	Cyprus
HIC	High income	CZE	Czechia
HIC	High income	DNK	Denmark
HIC	High income	EST	Estonia
HIC	High income	FRO	Faroe Islands
HIC	High income	FIN	Finland
HIC	High income	FRA	France
HIC	High income	PYF	French Polynesia
HIC	High income	DEU	Germany
HIC	High income	GIB	Gibraltar
HIC	High income	GRC	Greece
HIC	High income	GRL	Greenland
HIC	High income	GUM	Guam
HIC	High income	GUY	Guyana
HIC	High income	HKG	Hong Kong SAR, China
HIC	High income	HUN	Hungary
HIC	High income	ISL	Iceland
HIC	High income	IRL	Ireland
HIC	High income	IMN	Isle of Man
HIC	High income	ISR	Israel
HIC	High income	ITA	Italy
HIC	High income	JPN	Japan
HIC	High income	KOR	Korea, Rep.
HIC	High income	KWT	Kuwait
HIC	High income	LVA	Latvia
HIC	High income	LIE	Liechtenstein
HIC	High income	LTU	Lithuania
HIC	High income	LUX	Luxembourg
HIC	High income	MAC	Macao SAR, China
HIC	High income	MLT	Malta
HIC	High income	MCO	Monaco
HIC	High income	NRU	Nauru
HIC	High income	NLD	Netherlands
HIC	High income	NCL	New Caledonia
HIC	High income	NZL	New Zealand
HIC	High income	MNP	Northern Mariana Islands
HIC	High income	NOR	Norway
HIC	High income	OMN	Oman
HIC	High income	PLW	Palau
HIC	High income	PAN	Panama
HIC	High income	POL	Poland
HIC	High income	PRT	Portugal
HIC	High income	PRI	Puerto Rico
HIC	High income	QAT	Qatar
HIC	High income	ROU	Romania
HIC	High income	RUS	Russian Federation
HIC	High income	SMR	San Marino
HIC	High income	SAU	Saudi Arabia
HIC	High income	SYC	Seychelles
HIC	High income	SGP	Singapore
HIC	High income	SXM	Sint Maarten (Dutch part)
HIC	High income	SVK	Slovak Republic
HIC	High income	SVN	Slovenia
HIC	High income	ESP	Spain
HIC	High income	KNA	St. Kitts and Nevis
HIC	High income	MAF	St. Martin (French part)
HIC	High income	SWE	Sweden
HIC	High income	CHE	Switzerland
HIC	High income	TWN	Taiwan, China
HIC	High income	TTO	Trinidad and Tobago
HIC	High income	TCA	Turks and Caicos Islands
HIC	High income	ARE	United Arab Emirates
HIC	High income	GBR	United Kingdom
HIC	High income	USA	United States
HIC	High income	URY	Uruguay
HIC	High income	VIR	Virgin Islands (U.S.)
IBD	IBRD only	ALB	Albania
IBD	IBRD only	DZA	Algeria
IBD	IBRD only	AGO	Angola
IBD	IBRD only	ATG	Antigua and Barbuda
IBD	IBRD only	ARG	Argentina
IBD	IBRD only	ARM	Armenia
IBD	IBRD only	AZE	Azerbaijan
IBD	IBRD only	BRB	Barbados
IBD	IBRD only	BLR	Belarus
IBD	IBRD only	BOL	Bolivia
IBD	IBRD only	BIH	Bosnia and Herzegovina
IBD	IBRD only	BWA	Botswana
IBD	IBRD only	BRA	Brazil
IBD	IBRD only	BGR	Bulgaria
IBD	IBRD only	CHL	Chile
IBD	IBRD only	CHN	China
IBD	IBRD only	COL	Colombia
IBD	IBRD only	CRI	Costa Rica
IBD	IBRD only	HRV	Croatia
IBD	IBRD only	DOM	Dominican Republic
IBD	IBRD only	ECU	Ecuador
IBD	IBRD only	EGY	Egypt, Arab Rep.
IBD	IBRD only	SLV	El Salvador
IBD	IBRD only	GNQ	Equatorial Guinea
IBD	IBRD only	GAB	Gabon
IBD	IBRD only	GEO	Georgia
IBD	IBRD only	GTM	Guatemala
IBD	IBRD only	IND	India
IBD	IBRD only	IDN	Indonesia
IBD	IBRD only	IRN	Iran, Islamic Rep.
IBD	IBRD only	IRQ	Iraq
IBD	IBRD only	JAM	Jamaica
IBD	IBRD only	JOR	Jordan
IBD	IBRD only	KAZ	Kazakhstan
IBD	IBRD only	LBN	Lebanon
IBD	IBRD only	LBY	Libya
IBD	IBRD only	MYS	Malaysia
IBD	IBRD only	MUS	Mauritius
IBD	IBRD only	MEX	Mexico
IBD	IBRD only	MDA	Moldova
IBD	IBRD only	MNG	Mongolia
IBD	IBRD only	MNE	Montenegro
IBD	IBRD only	MAR	Morocco
IBD	IBRD only	NAM	Namibia
IBD	IBRD only	NRU	Nauru
IBD	IBRD only	MKD	North Macedonia
IBD	IBRD only	PLW	Palau
IBD	IBRD only	PAN	Panama
IBD	IBRD only	PRY	Paraguay
IBD	IBRD only	PER	Peru
IBD	IBRD only	PHL	Philippines
IBD	IBRD only	POL	Poland
IBD	IBRD only	ROU	Romania
IBD	IBRD only	RUS	Russian Federation
IBD	IBRD only	SRB	Serbia
IBD	IBRD only	SYC	Seychelles
IBD	IBRD only	ZAF	South Africa
IBD	IBRD only	KNA	St. Kitts and Nevis
IBD	IBRD only	THA	Thailand
IBD	IBRD only	TTO	Trinidad and Tobago
IBD	IBRD only	TUN	Tunisia
IBD	IBRD only	TUR	Türkiye
IBD	IBRD only	TKM	Turkmenistan
IBD	IBRD only	UKR	Ukraine
IBD	IBRD only	URY	Uruguay
IBD	IBRD only	VEN	Venezuela, RB
IBD	IBRD only	VNM	Vietnam
IBT	IDA & IBRD total	AFG	Afghanistan
IBT	IDA & IBRD total	ALB	Albania
IBT	IDA & IBRD total	DZA	Algeria
IBT	IDA & IBRD total	AGO	Angola
IBT	IDA & IBRD total	ATG	Antigua and Barbuda
IBT	IDA & IBRD total	ARG	Argentina
IBT	IDA & IBRD total	ARM	Armenia
IBT	IDA & IBRD total	AZE	Azerbaijan
IBT	IDA & IBRD total	BGD	Bangladesh
IBT	IDA & IBRD total	BRB	Barbados
IBT	IDA & IBRD total	BLR	Belarus
IBT	IDA & IBRD total	BLZ	Belize
IBT	IDA & IBRD total	BEN	Benin
IBT	IDA & IBRD total	BTN	Bhutan
IBT	IDA & IBRD total	BOL	Bolivia
IBT	IDA & IBRD total	BIH	Bosnia and Herzegovina
IBT	IDA & IBRD total	BWA	Botswana
IBT	IDA & IBRD total	BRA	Brazil
IBT	IDA & IBRD total	BGR	Bulgaria
IBT	IDA & IBRD total	BFA	Burkina Faso
IBT	IDA & IBRD total	BDI	Burundi
IBT	IDA & IBRD total	CPV	Cabo Verde
IBT	IDA & IBRD total	KHM	Cambodia
IBT	IDA & IBRD total	CMR	Cameroon
IBT	IDA & IBRD total	CAF	Central African Republic
IBT	IDA & IBRD total	TCD	Chad
IBT	IDA & IBRD total	CHL	Chile
IBT	IDA & IBRD total	CHN	China
IBT	IDA & IBRD total	COL	Colombia
IBT	IDA & IBRD total	COM	Comoros
IBT	IDA & IBRD total	COD	Congo, Dem. Rep.
IBT	IDA & IBRD total	COG	Congo, Rep.
IBT	IDA & IBRD total	CRI	Costa Rica
IBT	IDA & IBRD total	CIV	Côte d’Ivoire
IBT	IDA & IBRD total	HRV	Croatia
IBT	IDA & IBRD total	DJI	Djibouti
IBT	IDA & IBRD total	DMA	Dominica
IBT	IDA & IBRD total	DOM	Dominican Republic
IBT	IDA & IBRD total	ECU	Ecuador
IBT	IDA & IBRD total	EGY	Egypt, Arab Rep.
IBT	IDA & IBRD total	SLV	El Salvador
IBT	IDA & IBRD total	GNQ	Equatorial Guinea
IBT	IDA & IBRD total	ERI	Eritrea
IBT	IDA & IBRD total	SWZ	Eswatini
IBT	IDA & IBRD total	ETH	Ethiopia
IBT	IDA & IBRD total	FJI	Fiji
IBT	IDA & IBRD total	GAB	Gabon
IBT	IDA & IBRD total	GMB	Gambia, The
IBT	IDA & IBRD total	GEO	Georgia
IBT	IDA & IBRD total	GHA	Ghana
IBT	IDA & IBRD total	GRD	Grenada
IBT	IDA & IBRD total	GTM	Guatemala
IBT	IDA & IBRD total	GIN	Guinea
IBT	IDA & IBRD total	GNB	Guinea-Bissau
IBT	IDA & IBRD total	GUY	Guyana
IBT	IDA & IBRD total	HTI	Haiti
IBT	IDA & IBRD total	HND	Honduras
IBT	IDA & IBRD total	IND	India
IBT	IDA & IBRD total	IDN	Indonesia
IBT	IDA & IBRD total	IRN	Iran, Islamic Rep.
IBT	IDA & IBRD total	IRQ	Iraq
IBT	IDA & IBRD total	JAM	Jamaica
IBT	IDA & IBRD total	JOR	Jordan
IBT	IDA & IBRD total	KAZ	Kazakhstan
IBT	IDA & IBRD total	KEN	Kenya
IBT	IDA & IBRD total	KIR	Kiribati
IBT	IDA & IBRD total	XKX	Kosovo
IBT	IDA & IBRD total	KGZ	Kyrgyz Republic
IBT	IDA & IBRD total	LAO	Lao PDR
IBT	IDA & IBRD total	LBN	Lebanon
IBT	IDA & IBRD total	LSO	Lesotho
IBT	IDA & IBRD total	LBR	Liberia
IBT	IDA & IBRD total	LBY	Libya
IBT	IDA & IBRD total	MDG	Madagascar
IBT	IDA & IBRD total	MWI	Malawi
IBT	IDA & IBRD total	MYS	Malaysia
IBT	IDA & IBRD total	MDV	Maldives
IBT	IDA & IBRD total	MLI	Mali
IBT	IDA & IBRD total	MHL	Marshall Islands
IBT	IDA & IBRD total	MRT	Mauritania
IBT	IDA & IBRD total	MUS	Mauritius
IBT	IDA & IBRD total	MEX	Mexico
IBT	IDA & IBRD total	FSM	Micronesia, Fed. Sts.
IBT	IDA & IBRD total	MDA	Moldova
IBT	IDA & IBRD total	MNG	Mongolia
IBT	IDA & IBRD total	MNE	Montenegro
IBT	IDA & IBRD total	MAR	Morocco
IBT	IDA & IBRD total	MOZ	Mozambique
IBT	IDA & IBRD total	MMR	Myanmar
IBT	IDA & IBRD total	NAM	Namibia
IBT	IDA & IBRD total	NRU	Nauru
IBT	IDA & IBRD total	NPL	Nepal
IBT	IDA & IBRD total	NIC	Nicaragua
IBT	IDA & IBRD total	NER	Niger
IBT	IDA & IBRD total	NGA	Nigeria
IBT	IDA & IBRD total	MKD	North Macedonia
IBT	IDA & IBRD total	PAK	Pakistan
IBT	IDA & IBRD total	PLW	Palau
IBT	IDA & IBRD total	PAN	Panama
IBT	IDA & IBRD total	PNG	Papua New Guinea
IBT	IDA & IBRD total	PRY	Paraguay
IBT	IDA & IBRD total	PER	Peru
IBT	IDA & IBRD total	PHL	Philippines
IBT	IDA & IBRD total	POL	Poland
IBT	IDA & IBRD total	ROU	Romania
IBT	IDA & IBRD total	RUS	Russian Federation
IBT	IDA & IBRD total	RWA	Rwanda
IBT	IDA & IBRD total	WSM	Samoa
IBT	IDA & IBRD total	STP	São Tomé and Príncipe
IBT	IDA & IBRD total	SEN	Senegal
IBT	IDA & IBRD total	SRB	Serbia
IBT	IDA & IBRD total	SYC	Seychelles
IBT	IDA & IBRD total	SLE	Sierra Leone
IBT	IDA & IBRD total	SLB	Solomon Islands
IBT	IDA & IBRD total	SOM	Somalia, Fed. Rep.
IBT	IDA & IBRD total	ZAF	South Africa
IBT	IDA & IBRD total	SSD	South Sudan
IBT	IDA & IBRD total	LKA	Sri Lanka
IBT	IDA & IBRD total	KNA	St. Kitts and Nevis
IBT	IDA & IBRD total	LCA	St. Lucia
IBT	IDA & IBRD total	VCT	St. Vincent and the Grenadines
IBT	IDA & IBRD total	SDN	Sudan
IBT	IDA & IBRD total	SUR	Suriname
IBT	IDA & IBRD total	SYR	Syrian Arab Republic
IBT	IDA & IBRD total	TJK	Tajikistan
IBT	IDA & IBRD total	TZA	Tanzania
IBT	IDA & IBRD total	THA	Thailand
IBT	IDA & IBRD total	TLS	Timor-Leste
IBT	IDA & IBRD total	TGO	Togo
IBT	IDA & IBRD total	TON	Tonga
IBT	IDA & IBRD total	TTO	Trinidad and Tobago
IBT	IDA & IBRD total	TUN	Tunisia
IBT	IDA & IBRD total	TUR	Türkiye
IBT	IDA & IBRD total	TKM	Turkmenistan
IBT	IDA & IBRD total	TUV	Tuvalu
IBT	IDA & IBRD total	UGA	Uganda
IBT	IDA & IBRD total	UKR	Ukraine
IBT	IDA & IBRD total	URY	Uruguay
IBT	IDA & IBRD total	UZB	Uzbekistan
IBT	IDA & IBRD total	VUT	Vanuatu
IBT	IDA & IBRD total	VEN	Venezuela, RB
IBT	IDA & IBRD total	VNM	Vietnam
IBT	IDA & IBRD total	YEM	Yemen, Rep.
IBT	IDA & IBRD total	ZMB	Zambia
IBT	IDA & IBRD total	ZWE	Zimbabwe
IDB	IDA blend	BLZ	Belize
IDB	IDA blend	CPV	Cabo Verde
IDB	IDA blend	CMR	Cameroon
IDB	IDA blend	COG	Congo, Rep.
IDB	IDA blend	CIV	Côte d’Ivoire
IDB	IDA blend	DMA	Dominica
IDB	IDA blend	SWZ	Eswatini
IDB	IDA blend	FJI	Fiji
IDB	IDA blend	GRD	Grenada
IDB	IDA blend	KEN	Kenya
IDB	IDA blend	NGA	Nigeria
IDB	IDA blend	PAK	Pakistan
IDB	IDA blend	PNG	Papua New Guinea
IDB	IDA blend	LCA	St. Lucia
IDB	IDA blend	VCT	St. Vincent and the Grenadines
IDB	IDA blend	SUR	Suriname
IDB	IDA blend	TLS	Timor-Leste
IDB	IDA blend	UZB	Uzbekistan
IDB	IDA blend	ZWE	Zimbabwe
IDX	IDA only	AFG	Afghanistan
IDX	IDA only	BGD	Bangladesh
IDX	IDA only	BEN	Benin
IDX	IDA only	BTN	Bhutan
IDX	IDA only	BFA	Burkina Faso
IDX	IDA only	BDI	Burundi
IDX	IDA only	KHM	Cambodia
IDX	IDA only	CAF	Central African Republic
IDX	IDA only	TCD	Chad
IDX	IDA only	COM	Comoros
IDX	IDA only	COD	Congo, Dem. Rep.
IDX	IDA only	DJI	Djibouti
IDX	IDA only	ERI	Eritrea
IDX	IDA only	ETH	Ethiopia
IDX	IDA only	GMB	Gambia, The
IDX	IDA only	GHA	Ghana
IDX	IDA only	GIN	Guinea
IDX	IDA only	GNB	Guinea-Bissau
IDX	IDA only	GUY	Guyana
IDX	IDA only	HTI	Haiti
IDX	IDA only	HND	Honduras
IDX	IDA only	KIR	Kiribati
IDX	IDA only	XKX	Kosovo
IDX	IDA only	KGZ	Kyrgyz Republic
IDX	IDA only	LAO	Lao PDR
IDX	IDA only	LSO	Lesotho
IDX	IDA only	LBR	Liberia
IDX	IDA only	MDG	Madagascar
IDX	IDA only	MWI	Malawi
IDX	IDA only	MDV	Maldives
IDX	IDA only	MLI	Mali
IDX	IDA only	MHL	Marshall Islands
IDX	IDA only	MRT	Mauritania
IDX	IDA only	FSM	Micronesia, Fed. Sts.
IDX	IDA only	MOZ	Mozambique
IDX	IDA only	MMR	Myanmar
IDX	IDA only	NPL	Nepal
IDX	IDA only	NIC	Nicaragua
IDX	IDA only	NER	Niger
IDX	IDA only	RWA	Rwanda
IDX	IDA only	WSM	Samoa
IDX	IDA only	STP	São Tomé and Príncipe
IDX	IDA only	SEN	Senegal
IDX	IDA only	SLE	Sierra Leone
IDX	IDA only	SLB	Solomon Islands
IDX	IDA only	SOM	Somalia, Fed. Rep.
IDX	IDA only	SSD	South Sudan
IDX	IDA only	LKA	Sri Lanka
IDX	IDA only	SDN	Sudan
IDX	IDA only	SYR	Syrian Arab Republic
IDX	IDA only	TJK	Tajikistan
IDX	IDA only	TZA	Tanzania
IDX	IDA only	TGO	Togo
IDX	IDA only	TON	Tonga
IDX	IDA only	TUV	Tuvalu
IDX	IDA only	UGA	Uganda
IDX	IDA only	VUT	Vanuatu
IDX	IDA only	YEM	Yemen, Rep.
IDX	IDA only	ZMB	Zambia
IDA	IDA total	AFG	Afghanistan
IDA	IDA total	BGD	Bangladesh
IDA	IDA total	BLZ	Belize
IDA	IDA total	BEN	Benin
IDA	IDA total	BTN	Bhutan
IDA	IDA total	BFA	Burkina Faso
IDA	IDA total	BDI	Burundi
IDA	IDA total	CPV	Cabo Verde
IDA	IDA total	KHM	Cambodia
IDA	IDA total	CMR	Cameroon
IDA	IDA total	CAF	Central African Republic
IDA	IDA total	TCD	Chad
IDA	IDA total	COM	Comoros
IDA	IDA total	COD	Congo, Dem. Rep.
IDA	IDA total	COG	Congo, Rep.
IDA	IDA total	CIV	Côte d’Ivoire
IDA	IDA total	DJI	Djibouti
IDA	IDA total	DMA	Dominica
IDA	IDA total	ERI	Eritrea
IDA	IDA total	SWZ	Eswatini
IDA	IDA total	ETH	Ethiopia
IDA	IDA total	FJI	Fiji
IDA	IDA total	GMB	Gambia, The
IDA	IDA total	GHA	Ghana
IDA	IDA total	GRD	Grenada
IDA	IDA total	GIN	Guinea
IDA	IDA total	GNB	Guinea-Bissau
IDA	IDA total	GUY	Guyana
IDA	IDA total	HTI	Haiti
IDA	IDA total	HND	Honduras
IDA	IDA total	KEN	Kenya
IDA	IDA total	KIR	Kiribati
IDA	IDA total	XKX	Kosovo
IDA	IDA total	KGZ	Kyrgyz Republic
IDA	IDA total	LAO	Lao PDR
IDA	IDA total	LSO	Lesotho
IDA	IDA total	LBR	Liberia
IDA	IDA total	MDG	Madagascar
IDA	IDA total	MWI	Malawi
IDA	IDA total	MDV	Maldives
IDA	IDA total	MLI	Mali
IDA	IDA total	MHL	Marshall Islands
IDA	IDA total	MRT	Mauritania
IDA	IDA total	FSM	Micronesia, Fed. Sts.
IDA	IDA total	MOZ	Mozambique
IDA	IDA total	MMR	Myanmar
IDA	IDA total	NPL	Nepal
IDA	IDA total	NIC	Nicaragua
IDA	IDA total	NER	Niger
IDA	IDA total	NGA	Nigeria
IDA	IDA total	PAK	Pakistan
IDA	IDA total	PNG	Papua New Guinea
IDA	IDA total	RWA	Rwanda
IDA	IDA total	WSM	Samoa
IDA	IDA total	STP	São Tomé and Príncipe
IDA	IDA total	SEN	Senegal
IDA	IDA total	SLE	Sierra Leone
IDA	IDA total	SLB	Solomon Islands
IDA	IDA total	SOM	Somalia, Fed. Rep.
IDA	IDA total	SSD	South Sudan
IDA	IDA total	LKA	Sri Lanka
IDA	IDA total	LCA	St. Lucia
IDA	IDA total	VCT	St. Vincent and the Grenadines
IDA	IDA total	SDN	Sudan
IDA	IDA total	SUR	Suriname
IDA	IDA total	SYR	Syrian Arab Republic
IDA	IDA total	TJK	Tajikistan
IDA	IDA total	TZA	Tanzania
IDA	IDA total	TLS	Timor-Leste
IDA	IDA total	TGO	Togo
IDA	IDA total	TON	Tonga
IDA	IDA total	TUV	Tuvalu
IDA	IDA total	UGA	Uganda
IDA	IDA total	UZB	Uzbekistan
IDA	IDA total	VUT	Vanuatu
IDA	IDA total	YEM	Yemen, Rep.
IDA	IDA total	ZMB	Zambia
IDA	IDA total	ZWE	Zimbabwe
LTE	Late-demographic dividend	ALB	Albania
LTE	Late-demographic dividend	ARM	Armenia
LTE	Late-demographic dividend	ABW	Aruba
LTE	Late-demographic dividend	AZE	Azerbaijan
LTE	Late-demographic dividend	BHS	Bahamas, The
LTE	Late-demographic dividend	BRA	Brazil
LTE	Late-demographic dividend	BRN	Brunei Darussalam
LTE	Late-demographic dividend	CHL	Chile
LTE	Late-demographic dividend	CHN	China
LTE	Late-demographic dividend	COL	Colombia
LTE	Late-demographic dividend	CRI	Costa Rica
LTE	Late-demographic dividend	CYP	Cyprus
LTE	Late-demographic dividend	EST	Estonia
LTE	Late-demographic dividend	FJI	Fiji
LTE	Late-demographic dividend	PYF	French Polynesia
LTE	Late-demographic dividend	GEO	Georgia
LTE	Late-demographic dividend	GUM	Guam
LTE	Late-demographic dividend	GUY	Guyana
LTE	Late-demographic dividend	ISL	Iceland
LTE	Late-demographic dividend	IRL	Ireland
LTE	Late-demographic dividend	JAM	Jamaica
LTE	Late-demographic dividend	KAZ	Kazakhstan
LTE	Late-demographic dividend	PRK	Korea, Dem. People's Rep.
LTE	Late-demographic dividend	KWT	Kuwait
LTE	Late-demographic dividend	KGZ	Kyrgyz Republic
LTE	Late-demographic dividend	LVA	Latvia
LTE	Late-demographic dividend	LBN	Lebanon
LTE	Late-demographic dividend	MYS	Malaysia
LTE	Late-demographic dividend	MUS	Mauritius
LTE	Late-demographic dividend	MDA	Moldova
LTE	Late-demographic dividend	MNG	Mongolia
LTE	Late-demographic dividend	MNE	Montenegro
LTE	Late-demographic dividend	MAR	Morocco
LTE	Late-demographic dividend	NCL	New Caledonia
LTE	Late-demographic dividend	MKD	North Macedonia
LTE	Late-demographic dividend	OMN	Oman
LTE	Late-demographic dividend	POL	Poland
LTE	Late-demographic dividend	PRI	Puerto Rico
LTE	Late-demographic dividend	QAT	Qatar
LTE	Late-demographic dividend	ROU	Romania
LTE	Late-demographic dividend	RUS	Russian Federation
LTE	Late-demographic dividend	SRB	Serbia
LTE	Late-demographic dividend	SYC	Seychelles
LTE	Late-demographic dividend	SVK	Slovak Republic
LTE	Late-demographic dividend	LKA	Sri Lanka
LTE	Late-demographic dividend	LCA	St. Lucia
LTE	Late-demographic dividend	VCT	St. Vincent and the Grenadines
LTE	Late-demographic dividend	THA	Thailand
LTE	Late-demographic dividend	TTO	Trinidad and Tobago
LTE	Late-demographic dividend	TUN	Tunisia
LTE	Late-demographic dividend	ARE	United Arab Emirates
LTE	Late-demographic dividend	URY	Uruguay
LTE	Late-demographic dividend	VNM	Vietnam
LTE	Late-demographic dividend	VIR	Virgin Islands (U.S.)
LCN	Latin America & Caribbean	ATG	Antigua and Barbuda
LCN	Latin America & Caribbean	ARG	Argentina
LCN	Latin America & Caribbean	ABW	Aruba
LCN	Latin America & Caribbean	BHS	Bahamas, The
LCN	Latin America & Caribbean	BRB	Barbados
LCN	Latin America & Caribbean	BLZ	Belize
LCN	Latin America & Caribbean	BOL	Bolivia
LCN	Latin America & Caribbean	BRA	Brazil
LCN	Latin America & Caribbean	VGB	British Virgin Islands
LCN	Latin America & Caribbean	CYM	Cayman Islands
LCN	Latin America & Caribbean	CHL	Chile
LCN	Latin America & Caribbean	COL	Colombia
LCN	Latin America & Caribbean	CRI	Costa Rica
LCN	Latin America & Caribbean	CUB	Cuba
LCN	Latin America & Caribbean	CUW	Curaçao
LCN	Latin America & Caribbean	DMA	Dominica
LCN	Latin America & Caribbean	DOM	Dominican Republic
LCN	Latin America & Caribbean	ECU	Ecuador
LCN	Latin America & Caribbean	SLV	El Salvador
LCN	Latin America & Caribbean	GRD	Grenada
LCN	Latin America & Caribbean	GTM	Guatemala
LCN	Latin America & Caribbean	GUY	Guyana
LCN	Latin America & Caribbean	HTI	Haiti
LCN	Latin America & Caribbean	HND	Honduras
LCN	Latin America & Caribbean	JAM	Jamaica
LCN	Latin America & Caribbean	MEX	Mexico
LCN	Latin America & Caribbean	NIC	Nicaragua
LCN	Latin America & Caribbean	PAN	Panama
LCN	Latin America & Caribbean	PRY	Paraguay
LCN	Latin America & Caribbean	PER	Peru
LCN	Latin America & Caribbean	PRI	Puerto Rico
LCN	Latin America & Caribbean	SXM	Sint Maarten (Dutch part)
LCN	Latin America & Caribbean	KNA	St. Kitts and Nevis
LCN	Latin America & Caribbean	LCA	St. Lucia
LCN	Latin America & Caribbean	MAF	St. Martin (French part)
LCN	Latin America & Caribbean	VCT	St. Vincent and the Grenadines
LCN	Latin America & Caribbean	SUR	Suriname
LCN	Latin America & Caribbean	TTO	Trinidad and Tobago
LCN	Latin America & Caribbean	TCA	Turks and Caicos Islands
LCN	Latin America & Caribbean	URY	Uruguay
LCN	Latin America & Caribbean	VEN	Venezuela, RB
LCN	Latin America & Caribbean	VIR	Virgin Islands (U.S.)
LAC	Latin America & Caribbean (excluding high income)	ARG	Argentina
LAC	Latin America & Caribbean (excluding high income)	BLZ	Belize
LAC	Latin America & Caribbean (excluding high income)	BOL	Bolivia
LAC	Latin America & Caribbean (excluding high income)	BRA	Brazil
LAC	Latin America & Caribbean (excluding high income)	COL	Colombia
LAC	Latin America & Caribbean (excluding high income)	CUB	Cuba
LAC	Latin America & Caribbean (excluding high income)	DMA	Dominica
LAC	Latin America & Caribbean (excluding high income)	DOM	Dominican Republic
LAC	Latin America & Caribbean (excluding high income)	ECU	Ecuador
LAC	Latin America & Caribbean (excluding high income)	SLV	El Salvador
LAC	Latin America & Caribbean (excluding high income)	GRD	Grenada
LAC	Latin America & Caribbean (excluding high income)	GTM	Guatemala
LAC	Latin America & Caribbean (excluding high income)	HTI	Haiti
LAC	Latin America & Caribbean (excluding high income)	HND	Honduras
LAC	Latin America & Caribbean (excluding high income)	JAM	Jamaica
LAC	Latin America & Caribbean (excluding high income)	MEX	Mexico
LAC	Latin America & Caribbean (excluding high income)	NIC	Nicaragua
LAC	Latin America & Caribbean (excluding high income)	PRY	Paraguay
LAC	Latin America & Caribbean (excluding high income)	PER	Peru
LAC	Latin America & Caribbean (excluding high income)	LCA	St. Lucia
LAC	Latin America & Caribbean (excluding high income)	VCT	St. Vincent and the Grenadines
LAC	Latin America & Caribbean (excluding high income)	SUR	Suriname
TLA	Latin America & Caribbean (IDA & IBRD)	ATG	Antigua and Barbuda
TLA	Latin America & Caribbean (IDA & IBRD)	ARG	Argentina
TLA	Latin America & Caribbean (IDA & IBRD)	BRB	Barbados
TLA	Latin America & Caribbean (IDA & IBRD)	BLZ	Belize
TLA	Latin America & Caribbean (IDA & IBRD)	BOL	Bolivia
TLA	Latin America & Caribbean (IDA & IBRD)	BRA	Brazil
TLA	Latin America & Caribbean (IDA & IBRD)	CHL	Chile
TLA	Latin America & Caribbean (IDA & IBRD)	COL	Colombia
TLA	Latin America & Caribbean (IDA & IBRD)	CRI	Costa Rica
TLA	Latin America & Caribbean (IDA & IBRD)	DMA	Dominica
TLA	Latin America & Caribbean (IDA & IBRD)	DOM	Dominican Republic
TLA	Latin America & Caribbean (IDA & IBRD)	ECU	Ecuador
TLA	Latin America & Caribbean (IDA & IBRD)	SLV	El Salvador
TLA	Latin America & Caribbean (IDA & IBRD)	GRD	Grenada
TLA	Latin America & Caribbean (IDA & IBRD)	GTM	Guatemala
TLA	Latin America & Caribbean (IDA & IBRD)	GUY	Guyana
TLA	Latin America & Caribbean (IDA & IBRD)	HTI	Haiti
TLA	Latin America & Caribbean (IDA & IBRD)	HND	Honduras
TLA	Latin America & Caribbean (IDA & IBRD)	JAM	Jamaica
TLA	Latin America & Caribbean (IDA & IBRD)	MEX	Mexico
TLA	Latin America & Caribbean (IDA & IBRD)	NIC	Nicaragua
TLA	Latin America & Caribbean (IDA & IBRD)	PAN	Panama
TLA	Latin America & Caribbean (IDA & IBRD)	PRY	Paraguay
TLA	Latin America & Caribbean (IDA & IBRD)	PER	Peru
TLA	Latin America & Caribbean (IDA & IBRD)	KNA	St. Kitts and Nevis
TLA	Latin America & Caribbean (IDA & IBRD)	LCA	St. Lucia
TLA	Latin America & Caribbean (IDA & IBRD)	VCT	St. Vincent and the Grenadines
TLA	Latin America & Caribbean (IDA & IBRD)	SUR	Suriname
TLA	Latin America & Caribbean (IDA & IBRD)	TTO	Trinidad and Tobago
TLA	Latin America & Caribbean (IDA & IBRD)	URY	Uruguay
TLA	Latin America & Caribbean (IDA & IBRD)	VEN	Venezuela, RB
LDC	Least developed countries: UN classification	AFG	Afghanistan
LDC	Least developed countries: UN classification	AGO	Angola
LDC	Least developed countries: UN classification	BGD	Bangladesh
LDC	Least developed countries: UN classification	BEN	Benin
LDC	Least developed countries: UN classification	BFA	Burkina Faso
LDC	Least developed countries: UN classification	BDI	Burundi
LDC	Least developed countries: UN classification	KHM	Cambodia
LDC	Least developed countries: UN classification	CAF	Central African Republic
LDC	Least developed countries: UN classification	TCD	Chad
LDC	Least developed countries: UN classification	COM	Comoros
LDC	Least developed countries: UN classification	COD	Congo, Dem. Rep.
LDC	Least developed countries: UN classification	DJI	Djibouti
LDC	Least developed countries: UN classification	ERI	Eritrea
LDC	Least developed countries: UN classification	ETH	Ethiopia
LDC	Least developed countries: UN classification	GMB	Gambia, The
LDC	Least developed countries: UN classification	GIN	Guinea
LDC	Least developed countries: UN classification	GNB	Guinea-Bissau
LDC	Least developed countries: UN classification	HTI	Haiti
LDC	Least developed countries: UN classification	KIR	Kiribati
LDC	Least developed countries: UN classification	LAO	Lao PDR
LDC	Least developed countries: UN classification	LSO	Lesotho
LDC	Least developed countries: UN classification	LBR	Liberia
LDC	Least developed countries: UN classification	MDG	Madagascar
LDC	Least developed countries: UN classification	MWI	Malawi
LDC	Least developed countries: UN classification	MLI	Mali
LDC	Least developed countries: UN classification	MRT	Mauritania
LDC	Least developed countries: UN classification	MOZ	Mozambique
LDC	Least developed countries: UN classification	MMR	Myanmar
LDC	Least developed countries: UN classification	NPL	Nepal
LDC	Least developed countries: UN classification	NER	Niger
LDC	Least developed countries: UN classification	RWA	Rwanda
LDC	Least developed countries: UN classification	SEN	Senegal
LDC	Least developed countries: UN classification	SLE	Sierra Leone
LDC	Least developed countries: UN classification	SLB	Solomon Islands
LDC	Least developed countries: UN classification	SOM	Somalia, Fed. Rep.
LDC	Least developed countries: UN classification	SSD	South Sudan
LDC	Least developed countries: UN classification	SDN	Sudan
LDC	Least developed countries: UN classification	TZA	Tanzania
LDC	Least developed countries: UN classification	TLS	Timor-Leste
LDC	Least developed countries: UN classification	TGO	Togo
LDC	Least developed countries: UN classification	TUV	Tuvalu
LDC	Least developed countries: UN classification	UGA	Uganda
LDC	Least developed countries: UN classification	YEM	Yemen, Rep.
LDC	Least developed countries: UN classification	ZMB	Zambia
LMY	Low & middle income	AFG	Afghanistan
LMY	Low & middle income	ALB	Albania
LMY	Low & middle income	DZA	Algeria
LMY	Low & middle income	AGO	Angola
LMY	Low & middle income	ARG	Argentina
LMY	Low & middle income	ARM	Armenia
LMY	Low & middle income	AZE	Azerbaijan
LMY	Low & middle income	BGD	Bangladesh
LMY	Low & middle income	BLR	Belarus
LMY	Low & middle income	BLZ	Belize
LMY	Low & middle income	BEN	Benin
LMY	Low & middle income	BTN	Bhutan
LMY	Low & middle income	BOL	Bolivia
LMY	Low & middle income	BIH	Bosnia and Herzegovina
LMY	Low & middle income	BWA	Botswana
LMY	Low & middle income	BRA	Brazil
LMY	Low & middle income	BFA	Burkina Faso
LMY	Low & middle income	BDI	Burundi
LMY	Low & middle income	CPV	Cabo Verde
LMY	Low & middle income	KHM	Cambodia
LMY	Low & middle income	CMR	Cameroon
LMY	Low & middle income	CAF	Central African Republic
LMY	Low & middle income	TCD	Chad
LMY	Low & middle income	CHN	China
LMY	Low & middle income	COL	Colombia
LMY	Low & middle income	COM	Comoros
LMY	Low & middle income	COD	Congo, Dem. Rep.
LMY	Low & middle income	COG	Congo, Rep.
LMY	Low & middle income	CIV	Côte d’Ivoire
LMY	Low & middle income	CUB	Cuba
LMY	Low & middle income	DJI	Djibouti
LMY	Low & middle income	DMA	Dominica
LMY	Low & middle income	DOM	Dominican Republic
LMY	Low & middle income	ECU	Ecuador
LMY	Low & middle income	EGY	Egypt, Arab Rep.
LMY	Low & middle income	SLV	El Salvador
LMY	Low & middle income	GNQ	Equatorial Guinea
LMY	Low & middle income	ERI	Eritrea
LMY	Low & middle income	SWZ	Eswatini
LMY	Low & middle income	FJI	Fiji
LMY	Low & middle income	GAB	Gabon
LMY	Low & middle income	GMB	Gambia, The
LMY	Low & middle income	GEO	Georgia
LMY	Low & middle income	GHA	Ghana
LMY	Low & middle income	GRD	Grenada
LMY	Low & middle income	GTM	Guatemala
LMY	Low & middle income	GIN	Guinea
LMY	Low & middle income	GNB	Guinea-Bissau
LMY	Low & middle income	HTI	Haiti
LMY	Low & middle income	HND	Honduras
LMY	Low & middle income	IND	India
LMY	Low & middle income	IDN	Indonesia
LMY	Low & middle income	IRN	Iran, Islamic Rep.
LMY	Low & middle income	IRQ	Iraq
LMY	Low & middle income	JAM	Jamaica
LMY	Low & middle income	JOR	Jordan
LMY	Low & middle income	KAZ	Kazakhstan
LMY	Low & middle income	KEN	Kenya
LMY	Low & middle income	KIR	Kiribati
LMY	Low & middle income	PRK	Korea, Dem. People's Rep.
LMY	Low & middle income	XKX	Kosovo
LMY	Low & middle income	KGZ	Kyrgyz Republic
LMY	Low & middle income	LAO	Lao PDR
LMY	Low & middle income	LBN	Lebanon
LMY	Low & middle income	LSO	Lesotho
LMY	Low & middle income	LBR	Liberia
LMY	Low & middle income	LBY	Libya
LMY	Low & middle income	MDG	Madagascar
LMY	Low & middle income	MWI	Malawi
LMY	Low & middle income	MYS	Malaysia
LMY	Low & middle income	MDV	Maldives
LMY	Low & middle income	MLI	Mali
LMY	Low & middle income	MHL	Marshall Islands
LMY	Low & middle income	MRT	Mauritania
LMY	Low & middle income	MUS	Mauritius
LMY	Low & middle income	MEX	Mexico
LMY	Low & middle income	FSM	Micronesia, Fed. Sts.
LMY	Low & middle income	MDA	Moldova
LMY	Low & middle income	MNG	Mongolia
LMY	Low & middle income	MNE	Montenegro
LMY	Low & middle income	MAR	Morocco
LMY	Low & middle income	MOZ	Mozambique
LMY	Low & middle income	MMR	Myanmar
LMY	Low & middle income	NAM	Namibia
LMY	Low & middle income	NPL	Nepal
LMY	Low & middle income	NIC	Nicaragua
LMY	Low & middle income	NER	Niger
LMY	Low & middle income	NGA	Nigeria
LMY	Low & middle income	MKD	North Macedonia
LMY	Low & middle income	PAK	Pakistan
LMY	Low & middle income	PNG	Papua New Guinea
LMY	Low & middle income	PRY	Paraguay
LMY	Low & middle income	PER	Peru
LMY	Low & middle income	PHL	Philippines
LMY	Low & middle income	RWA	Rwanda
LMY	Low & middle income	WSM	Samoa
LMY	Low & middle income	STP	São Tomé and Príncipe
LMY	Low & middle income	SEN	Senegal
LMY	Low & middle income	SRB	Serbia
LMY	Low & middle income	SLE	Sierra Leone
LMY	Low & middle income	SLB	Solomon Islands
LMY	Low & middle income	SOM	Somalia, Fed. Rep.
LMY	Low & middle income	ZAF	South Africa
LMY	Low & middle income	SSD	South Sudan
LMY	Low & middle income	LKA	Sri Lanka
LMY	Low & middle income	LCA	St. Lucia
LMY	Low & middle income	VCT	St. Vincent and the Grenadines
LMY	Low & middle income	SDN	Sudan
LMY	Low & middle income	SUR	Suriname
LMY	Low & middle income	SYR	Syrian Arab Republic
LMY	Low & middle income	TJK	Tajikistan
LMY	Low & middle income	TZA	Tanzania
LMY	Low & middle income	THA	Thailand
LMY	Low & middle income	TLS	Timor-Leste
LMY	Low & middle income	TGO	Togo
LMY	Low & middle income	TON	Tonga
LMY	Low & middle income	TUN	Tunisia
LMY	Low & middle income	TUR	Türkiye
LMY	Low & middle income	TKM	Turkmenistan
LMY	Low & middle income	TUV	Tuvalu
LMY	Low & middle income	UGA	Uganda
LMY	Low & middle income	UKR	Ukraine
LMY	Low & middle income	UZB	Uzbekistan
LMY	Low & middle income	VUT	Vanuatu
LMY	Low & middle income	VNM	Vietnam
LMY	Low & middle income	PSE	West Bank and Gaza
LMY	Low & middle income	YEM	Yemen, Rep.
LMY	Low & middle income	ZMB	Zambia
LMY	Low & middle income	ZWE	Zimbabwe
LIC	Low income	AFG	Afghanistan
LIC	Low income	BFA	Burkina Faso
LIC	Low income	BDI	Burundi
LIC	Low income	CAF	Central African Republic
LIC	Low income	TCD	Chad
LIC	Low income	COD	Congo, Dem. Rep.
LIC	Low income	ERI	Eritrea
LIC	Low income	GMB	Gambia, The
LIC	Low income	GNB	Guinea-Bissau
LIC	Low income	PRK	Korea, Dem. People's Rep.
LIC	Low income	LBR	Liberia
LIC	Low income	MDG	Madagascar
LIC	Low income	MWI	Malawi
LIC	Low income	MLI	Mali
LIC	Low income	MOZ	Mozambique
LIC	Low income	NER	Niger
LIC	Low income	RWA	Rwanda
LIC	Low income	SLE	Sierra Leone
LIC	Low income	SOM	Somalia, Fed. Rep.
LIC	Low income	SSD	South Sudan
LIC	Low income	SDN	Sudan
LIC	Low income	SYR	Syrian Arab Republic
LIC	Low income	TGO	Togo
LIC	Low income	UGA	Uganda
LIC	Low income	YEM	Yemen, Rep.
LMC	Lower middle income	AGO	Angola
LMC	Lower middle income	BGD	Bangladesh
LMC	Lower middle income	BEN	Benin
LMC	Lower middle income	BTN	Bhutan
LMC	Lower middle income	BOL	Bolivia
LMC	Lower middle income	KHM	Cambodia
LMC	Lower middle income	CMR	Cameroon
LMC	Lower middle income	COM	Comoros
LMC	Lower middle income	COG	Congo, Rep.
LMC	Lower middle income	CIV	Côte d’Ivoire
LMC	Lower middle income	DJI	Djibouti
LMC	Lower middle income	EGY	Egypt, Arab Rep.
LMC	Lower middle income	SWZ	Eswatini
LMC	Lower middle income	GHA	Ghana
LMC	Lower middle income	GIN	Guinea
LMC	Lower middle income	HTI	Haiti
LMC	Lower middle income	HND	Honduras
LMC	Lower middle income	IND	India
LMC	Lower middle income	JOR	Jordan
LMC	Lower middle income	KEN	Kenya
LMC	Lower middle income	KIR	Kiribati
LMC	Lower middle income	KGZ	Kyrgyz Republic
LMC	Lower middle income	LAO	Lao PDR
LMC	Lower middle income	LBN	Lebanon
LMC	Lower middle income	LSO	Lesotho
LMC	Lower middle income	MRT	Mauritania
LMC	Lower middle income	FSM	Micronesia, Fed. Sts.
LMC	Lower middle income	MAR	Morocco
LMC	Lower middle income	MMR	Myanmar
LMC	Lower middle income	NAM	Namibia
LMC	Lower middle income	NPL	Nepal
LMC	Lower middle income	NIC	Nicaragua
LMC	Lower middle income	NGA	Nigeria
LMC	Lower middle income	PAK	Pakistan
LMC	Lower middle income	PNG	Papua New Guinea
LMC	Lower middle income	PHL	Philippines
LMC	Lower middle income	STP	São Tomé and Príncipe
LMC	Lower middle income	SEN	Senegal
LMC	Lower middle income	SLB	Solomon Islands
LMC	Lower middle income	LKA	Sri Lanka
LMC	Lower middle income	TJK	Tajikistan
LMC	Lower middle income	TZA	Tanzania
LMC	Lower middle income	TLS	Timor-Leste
LMC	Lower middle income	TUN	Tunisia
LMC	Lower middle income	UZB	Uzbekistan
LMC	Lower middle income	VUT	Vanuatu
LMC	Lower middle income	VNM	Vietnam
LMC	Lower middle income	PSE	West Bank and Gaza
LMC	Lower middle income	ZMB	Zambia
LMC	Lower middle income	ZWE	Zimbabwe
MEA	Middle East, North Africa, Afghanistan & Pakistan	AFG	Afghanistan
MEA	Middle East, North Africa, Afghanistan & Pakistan	DZA	Algeria
MEA	Middle East, North Africa, Afghanistan & Pakistan	BHR	Bahrain
MEA	Middle East, North Africa, Afghanistan & Pakistan	DJI	Djibouti
MEA	Middle East, North Africa, Afghanistan & Pakistan	EGY	Egypt, Arab Rep.
MEA	Middle East, North Africa, Afghanistan & Pakistan	IRN	Iran, Islamic Rep.
MEA	Middle East, North Africa, Afghanistan & Pakistan	IRQ	Iraq
MEA	Middle East, North Africa, Afghanistan & Pakistan	ISR	Israel
MEA	Middle East, North Africa, Afghanistan & Pakistan	JOR	Jordan
MEA	Middle East, North Africa, Afghanistan & Pakistan	KWT	Kuwait
MEA	Middle East, North Africa, Afghanistan & Pakistan	LBN	Lebanon
MEA	Middle East, North Africa, Afghanistan & Pakistan	LBY	Libya
MEA	Middle East, North Africa, Afghanistan & Pakistan	MLT	Malta
MEA	Middle East, North Africa, Afghanistan & Pakistan	MAR	Morocco
MEA	Middle East, North Africa, Afghanistan & Pakistan	OMN	Oman
MEA	Middle East, North Africa, Afghanistan & Pakistan	PAK	Pakistan
MEA	Middle East, North Africa, Afghanistan & Pakistan	QAT	Qatar
MEA	Middle East, North Africa, Afghanistan & Pakistan	SAU	Saudi Arabia
MEA	Middle East, North Africa, Afghanistan & Pakistan	SYR	Syrian Arab Republic
MEA	Middle East, North Africa, Afghanistan & Pakistan	TUN	Tunisia
MEA	Middle East, North Africa, Afghanistan & Pakistan	ARE	United Arab Emirates
MEA	Middle East, North Africa, Afghanistan & Pakistan	PSE	West Bank and Gaza
MEA	Middle East, North Africa, Afghanistan & Pakistan	YEM	Yemen, Rep.
MNA	Middle East, North Africa, Afghanistan & Pakistan (excluding high income)	AFG	Afghanistan
MNA	Middle East, North Africa, Afghanistan & Pakistan (excluding high income)	DZA	Algeria
MNA	Middle East, North Africa, Afghanistan & Pakistan (excluding high income)	DJI	Djibouti
MNA	Middle East, North Africa, Afghanistan & Pakistan (excluding high income)	EGY	Egypt, Arab Rep.
MNA	Middle East, North Africa, Afghanistan & Pakistan (excluding high income)	IRN	Iran, Islamic Rep.
MNA	Middle East, North Africa, Afghanistan & Pakistan (excluding high income)	IRQ	Iraq
MNA	Middle East, North Africa, Afghanistan & Pakistan (excluding high income)	JOR	Jordan
MNA	Middle East, North Africa, Afghanistan & Pakistan (excluding high income)	LBN	Lebanon
MNA	Middle East, North Africa, Afghanistan & Pakistan (excluding high income)	LBY	Libya
MNA	Middle East, North Africa, Afghanistan & Pakistan (excluding high income)	MAR	Morocco
MNA	Middle East, North Africa, Afghanistan & Pakistan (excluding high income)	PAK	Pakistan
MNA	Middle East, North Africa, Afghanistan & Pakistan (excluding high income)	SYR	Syrian Arab Republic
MNA	Middle East, North Africa, Afghanistan & Pakistan (excluding high income)	TUN	Tunisia
MNA	Middle East, North Africa, Afghanistan & Pakistan (excluding high income)	PSE	West Bank and Gaza
MNA	Middle East, North Africa, Afghanistan & Pakistan (excluding high income)	YEM	Yemen, Rep.
TMN	Middle East, North Africa, Afghanistan & Pakistan (IDA & IBRD)	AFG	Afghanistan
TMN	Middle East, North Africa, Afghanistan & Pakistan (IDA & IBRD)	DZA	Algeria
TMN	Middle East, North Africa, Afghanistan & Pakistan (IDA & IBRD)	DJI	Djibouti
TMN	Middle East, North Africa, Afghanistan & Pakistan (IDA & IBRD)	EGY	Egypt, Arab Rep.
TMN	Middle East, North Africa, Afghanistan & Pakistan (IDA & IBRD)	IRN	Iran, Islamic Rep.
TMN	Middle East, North Africa, Afghanistan & Pakistan (IDA & IBRD)	IRQ	Iraq
TMN	Middle East, North Africa, Afghanistan & Pakistan (IDA & IBRD)	JOR	Jordan
TMN	Middle East, North Africa, Afghanistan & Pakistan (IDA & IBRD)	LBN	Lebanon
TMN	Middle East, North Africa, Afghanistan & Pakistan (IDA & IBRD)	LBY	Libya
TMN	Middle East, North Africa, Afghanistan & Pakistan (IDA & IBRD)	MAR	Morocco
TMN	Middle East, North Africa, Afghanistan & Pakistan (IDA & IBRD)	PAK	Pakistan
TMN	Middle East, North Africa, Afghanistan & Pakistan (IDA & IBRD)	SYR	Syrian Arab Republic
TMN	Middle East, North Africa, Afghanistan & Pakistan (IDA & IBRD)	TUN	Tunisia
TMN	Middle East, North Africa, Afghanistan & Pakistan (IDA & IBRD)	YEM	Yemen, Rep.
MIC	Middle income	ALB	Albania
MIC	Middle income	DZA	Algeria
MIC	Middle income	AGO	Angola
MIC	Middle income	ARG	Argentina
MIC	Middle income	ARM	Armenia
MIC	Middle income	AZE	Azerbaijan
MIC	Middle income	BGD	Bangladesh
MIC	Middle income	BLR	Belarus
MIC	Middle income	BLZ	Belize
MIC	Middle income	BEN	Benin
MIC	Middle income	BTN	Bhutan
MIC	Middle income	BOL	Bolivia
MIC	Middle income	BIH	Bosnia and Herzegovina
MIC	Middle income	BWA	Botswana
MIC	Middle income	BRA	Brazil
MIC	Middle income	CPV	Cabo Verde
MIC	Middle income	KHM	Cambodia
MIC	Middle income	CMR	Cameroon
MIC	Middle income	CHN	China
MIC	Middle income	COL	Colombia
MIC	Middle income	COM	Comoros
MIC	Middle income	COG	Congo, Rep.
MIC	Middle income	CIV	Côte d’Ivoire
MIC	Middle income	CUB	Cuba
MIC	Middle income	DJI	Djibouti
MIC	Middle income	DMA	Dominica
MIC	Middle income	DOM	Dominican Republic
MIC	Middle income	ECU	Ecuador
MIC	Middle income	EGY	Egypt, Arab Rep.
MIC	Middle income	SLV	El Salvador
MIC	Middle income	GNQ	Equatorial Guinea
MIC	Middle income	SWZ	Eswatini
MIC	Middle income	FJI	Fiji
MIC	Middle income	GAB	Gabon
MIC	Middle income	GEO	Georgia
MIC	Middle income	GHA	Ghana
MIC	Middle income	GRD	Grenada
MIC	Middle income	GTM	Guatemala
MIC	Middle income	GIN	Guinea
MIC	Middle income	HTI	Haiti
MIC	Middle income	HND	Honduras
MIC	Middle income	IND	India
MIC	Middle income	IDN	Indonesia
MIC	Middle income	IRN	Iran, Islamic Rep.
MIC	Middle income	IRQ	Iraq
MIC	Middle income	JAM	Jamaica
MIC	Middle income	JOR	Jordan
MIC	Middle income	KAZ	Kazakhstan
MIC	Middle income	KEN	Kenya
MIC	Middle income	KIR	Kiribati
MIC	Middle income	XKX	Kosovo
MIC	Middle income	KGZ	Kyrgyz Republic
MIC	Middle income	LAO	Lao PDR
MIC	Middle income	LBN	Lebanon
MIC	Middle income	LSO	Lesotho
MIC	Middle income	LBY	Libya
MIC	Middle income	MYS	Malaysia
MIC	Middle income	MDV	Maldives
MIC	Middle income	MHL	Marshall Islands
MIC	Middle income	MRT	Mauritania
MIC	Middle income	MUS	Mauritius
MIC	Middle income	MEX	Mexico
MIC	Middle income	FSM	Micronesia, Fed. Sts.
MIC	Middle income	MDA	Moldova
MIC	Middle income	MNG	Mongolia
MIC	Middle income	MNE	Montenegro
MIC	Middle income	MAR	Morocco
MIC	Middle income	MMR	Myanmar
MIC	Middle income	NAM	Namibia
MIC	Middle income	NPL	Nepal
MIC	Middle income	NIC	Nicaragua
MIC	Middle income	NGA	Nigeria
MIC	Middle income	MKD	North Macedonia
MIC	Middle income	PAK	Pakistan
MIC	Middle income	PNG	Papua New Guinea
MIC	Middle income	PRY	Paraguay
MIC	Middle income	PER	Peru
MIC	Middle income	PHL	Philippines
MIC	Middle income	WSM	Samoa
MIC	Middle income	STP	São Tomé and Príncipe
MIC	Middle income	SEN	Senegal
MIC	Middle income	SRB	Serbia
MIC	Middle income	SLB	Solomon Islands
MIC	Middle income	ZAF	South Africa
MIC	Middle income	LKA	Sri Lanka
MIC	Middle income	LCA	St. Lucia
MIC	Middle income	VCT	St. Vincent and the Grenadines
MIC	Middle income	SUR	Suriname
MIC	Middle income	TJK	Tajikistan
MIC	Middle income	TZA	Tanzania
MIC	Middle income	THA	Thailand
MIC	Middle income	TLS	Timor-Leste
MIC	Middle income	TON	Tonga
MIC	Middle income	TUN	Tunisia
MIC	Middle income	TUR	Türkiye
MIC	Middle income	TKM	Turkmenistan
MIC	Middle income	TUV	Tuvalu
MIC	Middle income	UKR	Ukraine
MIC	Middle income	UZB	Uzbekistan
MIC	Middle income	VUT	Vanuatu
MIC	Middle income	VNM	Vietnam
MIC	Middle income	PSE	West Bank and Gaza
MIC	Middle income	ZMB	Zambia
MIC	Middle income	ZWE	Zimbabwe
NAC	North America	BMU	Bermuda
NAC	North America	CAN	Canada
NAC	North America	USA	United States
OED	OECD members	AUS	Australia
OED	OECD members	AUT	Austria
OED	OECD members	BEL	Belgium
OED	OECD members	CAN	Canada
OED	OECD members	CHL	Chile
OED	OECD members	COL	Colombia
OED	OECD members	CRI	Costa Rica
OED	OECD members	CZE	Czechia
OED	OECD members	DNK	Denmark
OED	OECD members	EST	Estonia
OED	OECD members	FIN	Finland
OED	OECD members	FRA	France
OED	OECD members	DEU	Germany
OED	OECD members	GRC	Greece
OED	OECD members	HUN	Hungary
OED	OECD members	ISL	Iceland
OED	OECD members	IRL	Ireland
OED	OECD members	ISR	Israel
OED	OECD members	ITA	Italy
OED	OECD members	JPN	Japan
OED	OECD members	KOR	Korea, Rep.
OED	OECD members	LVA	Latvia
OED	OECD members	LTU	Lithuania
OED	OECD members	LUX	Luxembourg
OED	OECD members	MEX	Mexico
OED	OECD members	NLD	Netherlands
OED	OECD members	NZL	New Zealand
OED	OECD members	NOR	Norway
OED	OECD members	POL	Poland
OED	OECD members	PRT	Portugal
OED	OECD members	SVK	Slovak Republic
OED	OECD members	SVN	Slovenia
OED	OECD members	ESP	Spain
OED	OECD members	SWE	Sweden
OED	OECD members	CHE	Switzerland
OED	OECD members	TUR	Türkiye
OED	OECD members	GBR	United Kingdom
OED	OECD members	USA	United States
OSS	Other small states	BTN	Bhutan
OSS	Other small states	BRN	Brunei Darussalam
OSS	Other small states	CPV	Cabo Verde
OSS	Other small states	COM	Comoros
OSS	Other small states	CYP	Cyprus
OSS	Other small states	DJI	Djibouti
OSS	Other small states	EST	Estonia
OSS	Other small states	SWZ	Eswatini
OSS	Other small states	ISL	Iceland
OSS	Other small states	MDV	Maldives
OSS	Other small states	MLT	Malta
OSS	Other small states	MUS	Mauritius
OSS	Other small states	MNE	Montenegro
OSS	Other small states	SMR	San Marino
OSS	Other small states	STP	São Tomé and Príncipe
OSS	Other small states	SYC	Seychelles
OSS	Other small states	TLS	Timor-Leste
PSS	Pacific island small states	FJI	Fiji
PSS	Pacific island small states	KIR	Kiribati
PSS	Pacific island small states	MHL	Marshall Islands
PSS	Pacific island small states	FSM	Micronesia, Fed. Sts.
PSS	Pacific island small states	NRU	Nauru
PSS	Pacific island small states	PLW	Palau
PSS	Pacific island small states	WSM	Samoa
PSS	Pacific island small states	SLB	Solomon Islands
PSS	Pacific island small states	TON	Tonga
PSS	Pacific island small states	TUV	Tuvalu
PSS	Pacific island small states	VUT	Vanuatu
PST	Post-demographic dividend	ATG	Antigua and Barbuda
PST	Post-demographic dividend	AUS	Australia
PST	Post-demographic dividend	AUT	Austria
PST	Post-demographic dividend	BRB	Barbados
PST	Post-demographic dividend	BLR	Belarus
PST	Post-demographic dividend	BEL	Belgium
PST	Post-demographic dividend	BIH	Bosnia and Herzegovina
PST	Post-demographic dividend	BGR	Bulgaria
PST	Post-demographic dividend	CAN	Canada
PST	Post-demographic dividend	HRV	Croatia
PST	Post-demographic dividend	CUB	Cuba
PST	Post-demographic dividend	CZE	Czechia
PST	Post-demographic dividend	DNK	Denmark
PST	Post-demographic dividend	FIN	Finland
PST	Post-demographic dividend	FRA	France
PST	Post-demographic dividend	DEU	Germany
PST	Post-demographic dividend	GRC	Greece
PST	Post-demographic dividend	HKG	Hong Kong SAR, China
PST	Post-demographic dividend	HUN	Hungary
PST	Post-demographic dividend	ITA	Italy
PST	Post-demographic dividend	JPN	Japan
PST	Post-demographic dividend	KOR	Korea, Rep.
PST	Post-demographic dividend	LTU	Lithuania
PST	Post-demographic dividend	LUX	Luxembourg
PST	Post-demographic dividend	MAC	Macao SAR, China
PST	Post-demographic dividend	MLT	Malta
PST	Post-demographic dividend	NLD	Netherlands
PST	Post-demographic dividend	NZL	New Zealand
PST	Post-demographic dividend	NOR	Norway
PST	Post-demographic dividend	PRT	Portugal
PST	Post-demographic dividend	SGP	Singapore
PST	Post-demographic dividend	SVN	Slovenia
PST	Post-demographic dividend	ESP	Spain
PST	Post-demographic dividend	SWE	Sweden
PST	Post-demographic dividend	CHE	Switzerland
PST	Post-demographic dividend	UKR	Ukraine
PST	Post-demographic dividend	GBR	United Kingdom
PST	Post-demographic dividend	USA	United States
PRE	Pre-demographic dividend	AFG	Afghanistan
PRE	Pre-demographic dividend	AGO	Angola
PRE	Pre-demographic dividend	BEN	Benin
PRE	Pre-demographic dividend	BFA	Burkina Faso
PRE	Pre-demographic dividend	BDI	Burundi
PRE	Pre-demographic dividend	CMR	Cameroon
PRE	Pre-demographic dividend	CAF	Central African Republic
PRE	Pre-demographic dividend	TCD	Chad
PRE	Pre-demographic dividend	COM	Comoros
PRE	Pre-demographic dividend	COD	Congo, Dem. Rep.
PRE	Pre-demographic dividend	COG	Congo, Rep.
PRE	Pre-demographic dividend	CIV	Côte d’Ivoire
PRE	Pre-demographic dividend	GNQ	Equatorial Guinea
PRE	Pre-demographic dividend	ERI	Eritrea
PRE	Pre-demographic dividend	GMB	Gambia, The
PRE	Pre-demographic dividend	GIN	Guinea
PRE	Pre-demographic dividend	GNB	Guinea-Bissau
PRE	Pre-demographic dividend	IRQ	Iraq
PRE	Pre-demographic dividend	KEN	Kenya
PRE	Pre-demographic dividend	LBR	Liberia
PRE	Pre-demographic dividend	MDG	Madagascar
PRE	Pre-demographic dividend	MWI	Malawi
PRE	Pre-demographic dividend	MLI	Mali
PRE	Pre-demographic dividend	MRT	Mauritania
PRE	Pre-demographic dividend	MOZ	Mozambique
PRE	Pre-demographic dividend	NER	Niger
PRE	Pre-demographic dividend	NGA	Nigeria
PRE	Pre-demographic dividend	SEN	Senegal
PRE	Pre-demographic dividend	SLE	Sierra Leone
PRE	Pre-demographic dividend	SOM	Somalia, Fed. Rep.
PRE	Pre-demographic dividend	SSD	South Sudan
PRE	Pre-demographic dividend	SDN	Sudan
PRE	Pre-demographic dividend	TZA	Tanzania
PRE	Pre-demographic dividend	TLS	Timor-Leste
PRE	Pre-demographic dividend	TGO	Togo
PRE	Pre-demographic dividend	UGA	Uganda
PRE	Pre-demographic dividend	ZMB	Zambia
SST	Small states (SST)	ATG	Antigua and Barbuda
SST	Small states (SST)	BHS	Bahamas, The
SST	Small states (SST)	BRB	Barbados
SST	Small states (SST)	BLZ	Belize
SST	Small states (SST)	BTN	Bhutan
SST	Small states (SST)	BRN	Brunei Darussalam
SST	Small states (SST)	CPV	Cabo Verde
SST	Small states (SST)	COM	Comoros
SST	Small states (SST)	CYP	Cyprus
SST	Small states (SST)	DJI	Djibouti
SST	Small states (SST)	DMA	Dominica
SST	Small states (SST)	EST	Estonia
SST	Small states (SST)	SWZ	Eswatini
SST	Small states (SST)	FJI	Fiji
SST	Small states (SST)	GRD	Grenada
SST	Small states (SST)	GUY	Guyana
SST	Small states (SST)	ISL	Iceland
SST	Small states (SST)	KIR	Kiribati
SST	Small states (SST)	MDV	Maldives
SST	Small states (SST)	MLT	Malta
SST	Small states (SST)	MHL	Marshall Islands
SST	Small states (SST)	MUS	Mauritius
SST	Small states (SST)	FSM	Micronesia, Fed. Sts.
SST	Small states (SST)	MNE	Montenegro
SST	Small states (SST)	NRU	Nauru
SST	Small states (SST)	PLW	Palau
SST	Small states (SST)	WSM	Samoa
SST	Small states (SST)	SMR	San Marino
SST	Small states (SST)	STP	São Tomé and Príncipe
SST	Small states (SST)	SYC	Seychelles
SST	Small states (SST)	SLB	Solomon Islands
SST	Small states (SST)	KNA	St. Kitts and Nevis
SST	Small states (SST)	LCA	St. Lucia
SST	Small states (SST)	VCT	St. Vincent and the Grenadines
SST	Small states (SST)	SUR	Suriname
SST	Small states (SST)	TLS	Timor-Leste
SST	Small states (SST)	TON	Tonga
SST	Small states (SST)	TTO	Trinidad and Tobago
SST	Small states (SST)	TUV	Tuvalu
SST	Small states (SST)	VUT	Vanuatu
SAS	South Asia	BGD	Bangladesh
SAS	South Asia	BTN	Bhutan
SAS	South Asia	IND	India
SAS	South Asia	MDV	Maldives
SAS	South Asia	NPL	Nepal
SAS	South Asia	LKA	Sri Lanka
TSA	South Asia (IDA & IBRD)	BGD	Bangladesh
TSA	South Asia (IDA & IBRD)	BTN	Bhutan
TSA	South Asia (IDA & IBRD)	IND	India
TSA	South Asia (IDA & IBRD)	MDV	Maldives
TSA	South Asia (IDA & IBRD)	NPL	Nepal
TSA	South Asia (IDA & IBRD)	LKA	Sri Lanka
SSF	Sub-Saharan Africa	AGO	Angola
SSF	Sub-Saharan Africa	BEN	Benin
SSF	Sub-Saharan Africa	BWA	Botswana
SSF	Sub-Saharan Africa	BFA	Burkina Faso
SSF	Sub-Saharan Africa	BDI	Burundi
SSF	Sub-Saharan Africa	CPV	Cabo Verde
SSF	Sub-Saharan Africa	CMR	Cameroon
SSF	Sub-Saharan Africa	CAF	Central African Republic
SSF	Sub-Saharan Africa	TCD	Chad
SSF	Sub-Saharan Africa	COM	Comoros
SSF	Sub-Saharan Africa	COD	Congo, Dem. Rep.
SSF	Sub-Saharan Africa	COG	Congo, Rep.
SSF	Sub-Saharan Africa	CIV	Côte d’Ivoire
SSF	Sub-Saharan Africa	GNQ	Equatorial Guinea
SSF	Sub-Saharan Africa	ERI	Eritrea
SSF	Sub-Saharan Africa	SWZ	Eswatini
SSF	Sub-Saharan Africa	ETH	Ethiopia
SSF	Sub-Saharan Africa	GAB	Gabon
SSF	Sub-Saharan Africa	GMB	Gambia, The
SSF	Sub-Saharan Africa	GHA	Ghana
SSF	Sub-Saharan Africa	GIN	Guinea
SSF	Sub-Saharan Africa	GNB	Guinea-Bissau
SSF	Sub-Saharan Africa	KEN	Kenya
SSF	Sub-Saharan Africa	LSO	Lesotho
SSF	Sub-Saharan Africa	LBR	Liberia
SSF	Sub-Saharan Africa	MDG	Madagascar
SSF	Sub-Saharan Africa	MWI	Malawi
SSF	Sub-Saharan Africa	MLI	Mali
SSF	Sub-Saharan Africa	MRT	Mauritania
SSF	Sub-Saharan Africa	MUS	Mauritius
SSF	Sub-Saharan Africa	MOZ	Mozambique
SSF	Sub-Saharan Africa	NAM	Namibia
SSF	Sub-Saharan Africa	NER	Niger
SSF	Sub-Saharan Africa	NGA	Nigeria
SSF	Sub-Saharan Africa	RWA	Rwanda
SSF	Sub-Saharan Africa	STP	São Tomé and Príncipe
SSF	Sub-Saharan Africa	SEN	Senegal
SSF	Sub-Saharan Africa	SYC	Seychelles
SSF	Sub-Saharan Africa	SLE	Sierra Leone
SSF	Sub-Saharan Africa	SOM	Somalia, Fed. Rep.
SSF	Sub-Saharan Africa	ZAF	South Africa
SSF	Sub-Saharan Africa	SSD	South Sudan
SSF	Sub-Saharan Africa	SDN	Sudan
SSF	Sub-Saharan Africa	TZA	Tanzania
SSF	Sub-Saharan Africa	TGO	Togo
SSF	Sub-Saharan Africa	UGA	Uganda
SSF	Sub-Saharan Africa	ZMB	Zambia
SSF	Sub-Saharan Africa	ZWE	Zimbabwe
SSA	Sub-Saharan Africa (excluding high income)	AGO	Angola
SSA	Sub-Saharan Africa (excluding high income)	BEN	Benin
SSA	Sub-Saharan Africa (excluding high income)	BWA	Botswana
SSA	Sub-Saharan Africa (excluding high income)	BFA	Burkina Faso
SSA	Sub-Saharan Africa (excluding high income)	BDI	Burundi
SSA	Sub-Saharan Africa (excluding high income)	CPV	Cabo Verde
SSA	Sub-Saharan Africa (excluding high income)	CMR	Cameroon
SSA	Sub-Saharan Africa (excluding high income)	CAF	Central African Republic
SSA	Sub-Saharan Africa (excluding high income)	TCD	Chad
SSA	Sub-Saharan Africa (excluding high income)	COM	Comoros
SSA	Sub-Saharan Africa (excluding high income)	COD	Congo, Dem. Rep.
SSA	Sub-Saharan Africa (excluding high income)	COG	Congo, Rep.
SSA	Sub-Saharan Africa (excluding high income)	CIV	Côte d’Ivoire
SSA	Sub-Saharan Africa (excluding high income)	GNQ	Equatorial Guinea
SSA	Sub-Saharan Africa (excluding high income)	ERI	Eritrea
SSA	Sub-Saharan Africa (excluding high income)	SWZ	Eswatini
SSA	Sub-Saharan Africa (excluding high income)	GAB	Gabon
SSA	Sub-Saharan Africa (excluding high income)	GMB	Gambia, The
SSA	Sub-Saharan Africa (excluding high income)	GHA	Ghana
SSA	Sub-Saharan Africa (excluding high income)	GIN	Guinea
SSA	Sub-Saharan Africa (excluding high income)	GNB	Guinea-Bissau
SSA	Sub-Saharan Africa (excluding high income)	KEN	Kenya
SSA	Sub-Saharan Africa (excluding high income)	LSO	Lesotho
SSA	Sub-Saharan Africa (excluding high income)	LBR	Liberia
SSA	Sub-Saharan Africa (excluding high income)	MDG	Madagascar
SSA	Sub-Saharan Africa (excluding high income)	MWI	Malawi
SSA	Sub-Saharan Africa (excluding high income)	MLI	Mali
SSA	Sub-Saharan Africa (excluding high income)	MRT	Mauritania
SSA	Sub-Saharan Africa (excluding high income)	MUS	Mauritius
SSA	Sub-Saharan Africa (excluding high income)	MOZ	Mozambique
SSA	Sub-Saharan Africa (excluding high income)	NAM	Namibia
SSA	Sub-Saharan Africa (excluding high income)	NER	Niger
SSA	Sub-Saharan Africa (excluding high income)	NGA	Nigeria
SSA	Sub-Saharan Africa (excluding high income)	RWA	Rwanda
SSA	Sub-Saharan Africa (excluding high income)	STP	São Tomé and Príncipe
SSA	Sub-Saharan Africa (excluding high income)	SEN	Senegal
SSA	Sub-Saharan Africa (excluding high income)	SLE	Sierra Leone
SSA	Sub-Saharan Africa (excluding high income)	SOM	Somalia, Fed. Rep.
SSA	Sub-Saharan Africa (excluding high income)	ZAF	South Africa
SSA	Sub-Saharan Africa (excluding high income)	SSD	South Sudan
SSA	Sub-Saharan Africa (excluding high income)	SDN	Sudan
SSA	Sub-Saharan Africa (excluding high income)	TZA	Tanzania
SSA	Sub-Saharan Africa (excluding high income)	TGO	Togo
SSA	Sub-Saharan Africa (excluding high income)	UGA	Uganda
SSA	Sub-Saharan Africa (excluding high income)	ZMB	Zambia
SSA	Sub-Saharan Africa (excluding high income)	ZWE	Zimbabwe
TSS	Sub-Saharan Africa (IDA & IBRD)	AGO	Angola
TSS	Sub-Saharan Africa (IDA & IBRD)	BEN	Benin
TSS	Sub-Saharan Africa (IDA & IBRD)	BWA	Botswana
TSS	Sub-Saharan Africa (IDA & IBRD)	BFA	Burkina Faso
TSS	Sub-Saharan Africa (IDA & IBRD)	BDI	Burundi
TSS	Sub-Saharan Africa (IDA & IBRD)	CPV	Cabo Verde
TSS	Sub-Saharan Africa (IDA & IBRD)	CMR	Cameroon
TSS	Sub-Saharan Africa (IDA & IBRD)	CAF	Central African Republic
TSS	Sub-Saharan Africa (IDA & IBRD)	TCD	Chad
TSS	Sub-Saharan Africa (IDA & IBRD)	COM	Comoros
TSS	Sub-Saharan Africa (IDA & IBRD)	COD	Congo, Dem. Rep.
TSS	Sub-Saharan Africa (IDA & IBRD)	COG	Congo, Rep.
TSS	Sub-Saharan Africa (IDA & IBRD)	CIV	Côte d’Ivoire
TSS	Sub-Saharan Africa (IDA & IBRD)	GNQ	Equatorial Guinea
TSS	Sub-Saharan Africa (IDA & IBRD)	ERI	Eritrea
TSS	Sub-Saharan Africa (IDA & IBRD)	SWZ	Eswatini
TSS	Sub-Saharan Africa (IDA & IBRD)	ETH	Ethiopia
TSS	Sub-Saharan Africa (IDA & IBRD)	GAB	Gabon
TSS	Sub-Saharan Africa (IDA & IBRD)	GMB	Gambia, The
TSS	Sub-Saharan Africa (IDA & IBRD)	GHA	Ghana
TSS	Sub-Saharan Africa (IDA & IBRD)	GIN	Guinea
TSS	Sub-Saharan Africa (IDA & IBRD)	GNB	Guinea-Bissau
TSS	Sub-Saharan Africa (IDA & IBRD)	KEN	Kenya
TSS	Sub-Saharan Africa (IDA & IBRD)	LSO	Lesotho
TSS	Sub-Saharan Africa (IDA & IBRD)	LBR	Liberia
TSS	Sub-Saharan Africa (IDA & IBRD)	MDG	Madagascar
TSS	Sub-Saharan Africa (IDA & IBRD)	MWI	Malawi
TSS	Sub-Saharan Africa (IDA & IBRD)	MLI	Mali
TSS	Sub-Saharan Africa (IDA & IBRD)	MRT	Mauritania
TSS	Sub-Saharan Africa (IDA & IBRD)	MUS	Mauritius
TSS	Sub-Saharan Africa (IDA & IBRD)	MOZ	Mozambique
TSS	Sub-Saharan Africa (IDA & IBRD)	NAM	Namibia
TSS	Sub-Saharan Africa (IDA & IBRD)	NER	Niger
TSS	Sub-Saharan Africa (IDA & IBRD)	NGA	Nigeria
TSS	Sub-Saharan Africa (IDA & IBRD)	RWA	Rwanda
TSS	Sub-Saharan Africa (IDA & IBRD)	STP	São Tomé and Príncipe
TSS	Sub-Saharan Africa (IDA & IBRD)	SEN	Senegal
TSS	Sub-Saharan Africa (IDA & IBRD)	SYC	Seychelles
TSS	Sub-Saharan Africa (IDA & IBRD)	SLE	Sierra Leone
TSS	Sub-Saharan Africa (IDA & IBRD)	SOM	Somalia, Fed. Rep.
TSS	Sub-Saharan Africa (IDA & IBRD)	ZAF	South Africa
TSS	Sub-Saharan Africa (IDA & IBRD)	SSD	South Sudan
TSS	Sub-Saharan Africa (IDA & IBRD)	SDN	Sudan
TSS	Sub-Saharan Africa (IDA & IBRD)	TZA	Tanzania
TSS	Sub-Saharan Africa (IDA & IBRD)	TGO	Togo
TSS	Sub-Saharan Africa (IDA & IBRD)	UGA	Uganda
TSS	Sub-Saharan Africa (IDA & IBRD)	ZMB	Zambia
TSS	Sub-Saharan Africa (IDA & IBRD)	ZWE	Zimbabwe
UMC	Upper middle income	ALB	Albania
UMC	Upper middle income	DZA	Algeria
UMC	Upper middle income	ARG	Argentina
UMC	Upper middle income	ARM	Armenia
UMC	Upper middle income	AZE	Azerbaijan
UMC	Upper middle income	BLR	Belarus
UMC	Upper middle income	BLZ	Belize
UMC	Upper middle income	BIH	Bosnia and Herzegovina
UMC	Upper middle income	BWA	Botswana
UMC	Upper middle income	BRA	Brazil
UMC	Upper middle income	CPV	Cabo Verde
UMC	Upper middle income	CHN	China
UMC	Upper middle income	COL	Colombia
UMC	Upper middle income	CUB	Cuba
UMC	Upper middle income	DMA	Dominica
UMC	Upper middle income	DOM	Dominican Republic
UMC	Upper middle income	ECU	Ecuador
UMC	Upper middle income	SLV	El Salvador
UMC	Upper middle income	GNQ	Equatorial Guinea
UMC	Upper middle income	FJI	Fiji
UMC	Upper middle income	GAB	Gabon
UMC	Upper middle income	GEO	Georgia
UMC	Upper middle income	GRD	Grenada
UMC	Upper middle income	GTM	Guatemala
UMC	Upper middle income	IDN	Indonesia
UMC	Upper middle income	IRN	Iran, Islamic Rep.
UMC	Upper middle income	IRQ	Iraq
UMC	Upper middle income	JAM	Jamaica
UMC	Upper middle income	KAZ	Kazakhstan
UMC	Upper middle income	XKX	Kosovo
UMC	Upper middle income	LBY	Libya
UMC	Upper middle income	MYS	Malaysia
UMC	Upper middle income	MDV	Maldives
UMC	Upper middle income	MHL	Marshall Islands
UMC	Upper middle income	MUS	Mauritius
UMC	Upper middle income	MEX	Mexico
UMC	Upper middle income	MDA	Moldova
UMC	Upper middle income	MNG	Mongolia
UMC	Upper middle income	MNE	Montenegro
UMC	Upper middle income	MKD	North Macedonia
UMC	Upper middle income	PRY	Paraguay
UMC	Upper middle income	PER	Peru
UMC	Upper middle income	WSM	Samoa
UMC	Upper middle income	SRB	Serbia
UMC	Upper middle income	ZAF	South Africa
UMC	Upper middle income	LCA	St. Lucia
UMC	Upper middle income	VCT	St. Vincent and the Grenadines
UMC	Upper middle income	SUR	Suriname
UMC	Upper middle income	THA	Thailand
UMC	Upper middle income	TON	Tonga
UMC	Upper middle income	TUR	Türkiye
UMC	Upper middle income	TKM	Turkmenistan
UMC	Upper middle income	TUV	Tuvalu
UMC	Upper middle income	UKR	Ukraine
WLD	World	AFG	Afghanistan
WLD	World	ALB	Albania
WLD	World	DZA	Algeria
WLD	World	ASM	American Samoa
WLD	World	AND	Andorra
WLD	World	AGO	Angola
WLD	World	ATG	Antigua and Barbuda
WLD	World	ARG	Argentina
WLD	World	ARM	Armenia
WLD	World	ABW	Aruba
WLD	World	AUS	Australia
WLD	World	AUT	Austria
WLD	World	AZE	Azerbaijan
WLD	World	BHS	Bahamas, The
WLD	World	BHR	Bahrain
WLD	World	BGD	Bangladesh
WLD	World	BRB	Barbados
WLD	World	BLR	Belarus
WLD	World	BEL	Belgium
WLD	World	BLZ	Belize
WLD	World	BEN	Benin
WLD	World	BMU	Bermuda
WLD	World	BTN	Bhutan
WLD	World	BOL	Bolivia
WLD	World	BIH	Bosnia and Herzegovina
WLD	World	BWA	Botswana
WLD	World	BRA	Brazil
WLD	World	VGB	British Virgin Islands
WLD	World	BRN	Brunei Darussalam
WLD	World	BGR	Bulgaria
WLD	World	BFA	Burkina Faso
WLD	World	BDI	Burundi
WLD	World	CPV	Cabo Verde
WLD	World	KHM	Cambodia
WLD	World	CMR	Cameroon
WLD	World	CAN	Canada
WLD	World	CYM	Cayman Islands
WLD	World	CAF	Central African Republic
WLD	World	TCD	Chad
WLD	World	CHI	Channel Islands
WLD	World	CHL	Chile
WLD	World	CHN	China
WLD	World	COL	Colombia
WLD	World	COM	Comoros
WLD	World	COD	Congo, Dem. Rep.
WLD	World	COG	Congo, Rep.
WLD	World	CRI	Costa Rica
WLD	World	CIV	Côte d’Ivoire
WLD	World	HRV	Croatia
WLD	World	CUB	Cuba
WLD	World	CUW	Curaçao
WLD	World	CYP	Cyprus
WLD	World	CZE	Czechia
WLD	World	DNK	Denmark
WLD	World	DJI	Djibouti
WLD	World	DMA	Dominica
WLD	World	DOM	Dominican Republic
WLD	World	ECU	Ecuador
WLD	World	EGY	Egypt, Arab Rep.
WLD	World	SLV	El Salvador
WLD	World	GNQ	Equatorial Guinea
WLD	World	ERI	Eritrea
WLD	World	EST	Estonia
WLD	World	SWZ	Eswatini
WLD	World	ETH	Ethiopia
WLD	World	FRO	Faroe Islands
WLD	World	FJI	Fiji
WLD	World	FIN	Finland
WLD	World	FRA	France
WLD	World	PYF	French Polynesia
WLD	World	GAB	Gabon
WLD	World	GMB	Gambia, The
WLD	World	GEO	Georgia
WLD	World	DEU	Germany
WLD	World	GHA	Ghana
WLD	World	GIB	Gibraltar
WLD	World	GRC	Greece
WLD	World	GRL	Greenland
WLD	World	GRD	Grenada
WLD	World	GUM	Guam
WLD	World	GTM	Guatemala
WLD	World	GIN	Guinea
WLD	World	GNB	Guinea-Bissau
WLD	World	GUY	Guyana
WLD	World	HTI	Haiti
WLD	World	HND	Honduras
WLD	World	HKG	Hong Kong SAR, China
WLD	World	HUN	Hungary
WLD	World	ISL	Iceland
WLD	World	IND	India
WLD	World	IDN	Indonesia
WLD	World	IRN	Iran, Islamic Rep.
WLD	World	IRQ	Iraq
WLD	World	IRL	Ireland
WLD	World	IMN	Isle of Man
WLD	World	ISR	Israel
WLD	World	ITA	Italy
WLD	World	JAM	Jamaica
WLD	World	JPN	Japan
WLD	World	JOR	Jordan
WLD	World	KAZ	Kazakhstan
WLD	World	KEN	Kenya
WLD	World	KIR	Kiribati
WLD	World	PRK	Korea, Dem. People's Rep.
WLD	World	KOR	Korea, Rep.
WLD	World	XKX	Kosovo
WLD	World	KWT	Kuwait
WLD	World	KGZ	Kyrgyz Republic
WLD	World	LAO	Lao PDR
WLD	World	LVA	Latvia
WLD	World	LBN	Lebanon
WLD	World	LSO	Lesotho
WLD	World	LBR	Liberia
WLD	World	LBY	Libya
WLD	World	LIE	Liechtenstein
WLD	World	LTU	Lithuania
WLD	World	LUX	Luxembourg
WLD	World	MAC	Macao SAR, China
WLD	World	MDG	Madagascar
WLD	World	MWI	Malawi
WLD	World	MYS	Malaysia
WLD	World	MDV	Maldives
WLD	World	MLI	Mali
WLD	World	MLT	Malta
WLD	World	MHL	Marshall Islands
WLD	World	MRT	Mauritania
WLD	World	MUS	Mauritius
WLD	World	MEX	Mexico
WLD	World	FSM	Micronesia, Fed. Sts.
WLD	World	MDA	Moldova
WLD	World	MCO	Monaco
WLD	World	MNG	Mongolia
WLD	World	MNE	Montenegro
WLD	World	MAR	Morocco
WLD	World	MOZ	Mozambique
WLD	World	MMR	Myanmar
WLD	World	NAM	Namibia
WLD	World	NRU	Nauru
[truncated: 80 more rows]

## Sheet: notes
Notes
This table classifies all World Bank member countries (189), and all other economies with populations of more than 30,000. For operational and analytical purposes, economies are divided among income groups according to 2024 gross national income (GNI) per capita, calculated using the World Bank Atlas method. The groups are: low income, $1,135 or less; lower middle income, $1,136 to $4,495; upper …
IDA countries are those that lack the financial ability to borrow from IBRD. IDA credits are deeply concessional—interest-free loans and grants for programs aimed at boosting economic growth and improving living conditions. IBRD loans are noncessional. Blend countries are eligible for IDA credits because of their low per capita incomes but are also eligible for IBRD because they are financially c…
Notes: The term country, used interchangeably with economy, does not imply political independence but refers to any territory for which authorities report separate social or economic statistics. Income classifications set on July 1, 2025, remain in effect until July 1, 2026. Argentina, which was temporarily unclassified in July 2016 pending the release of revised national accounts statistics, was…
